# Supplementary material for: Bariatric Surgery Induces Disruption in Inflammatory Signaling Pathways Mediated by Immune Cells in Adipose Tissue: A RNA-Seq Study
Source: PubMed Central journal article supplement (PMC4418598; doi:10.1371/journal.pone.0125718), 2015-05-04

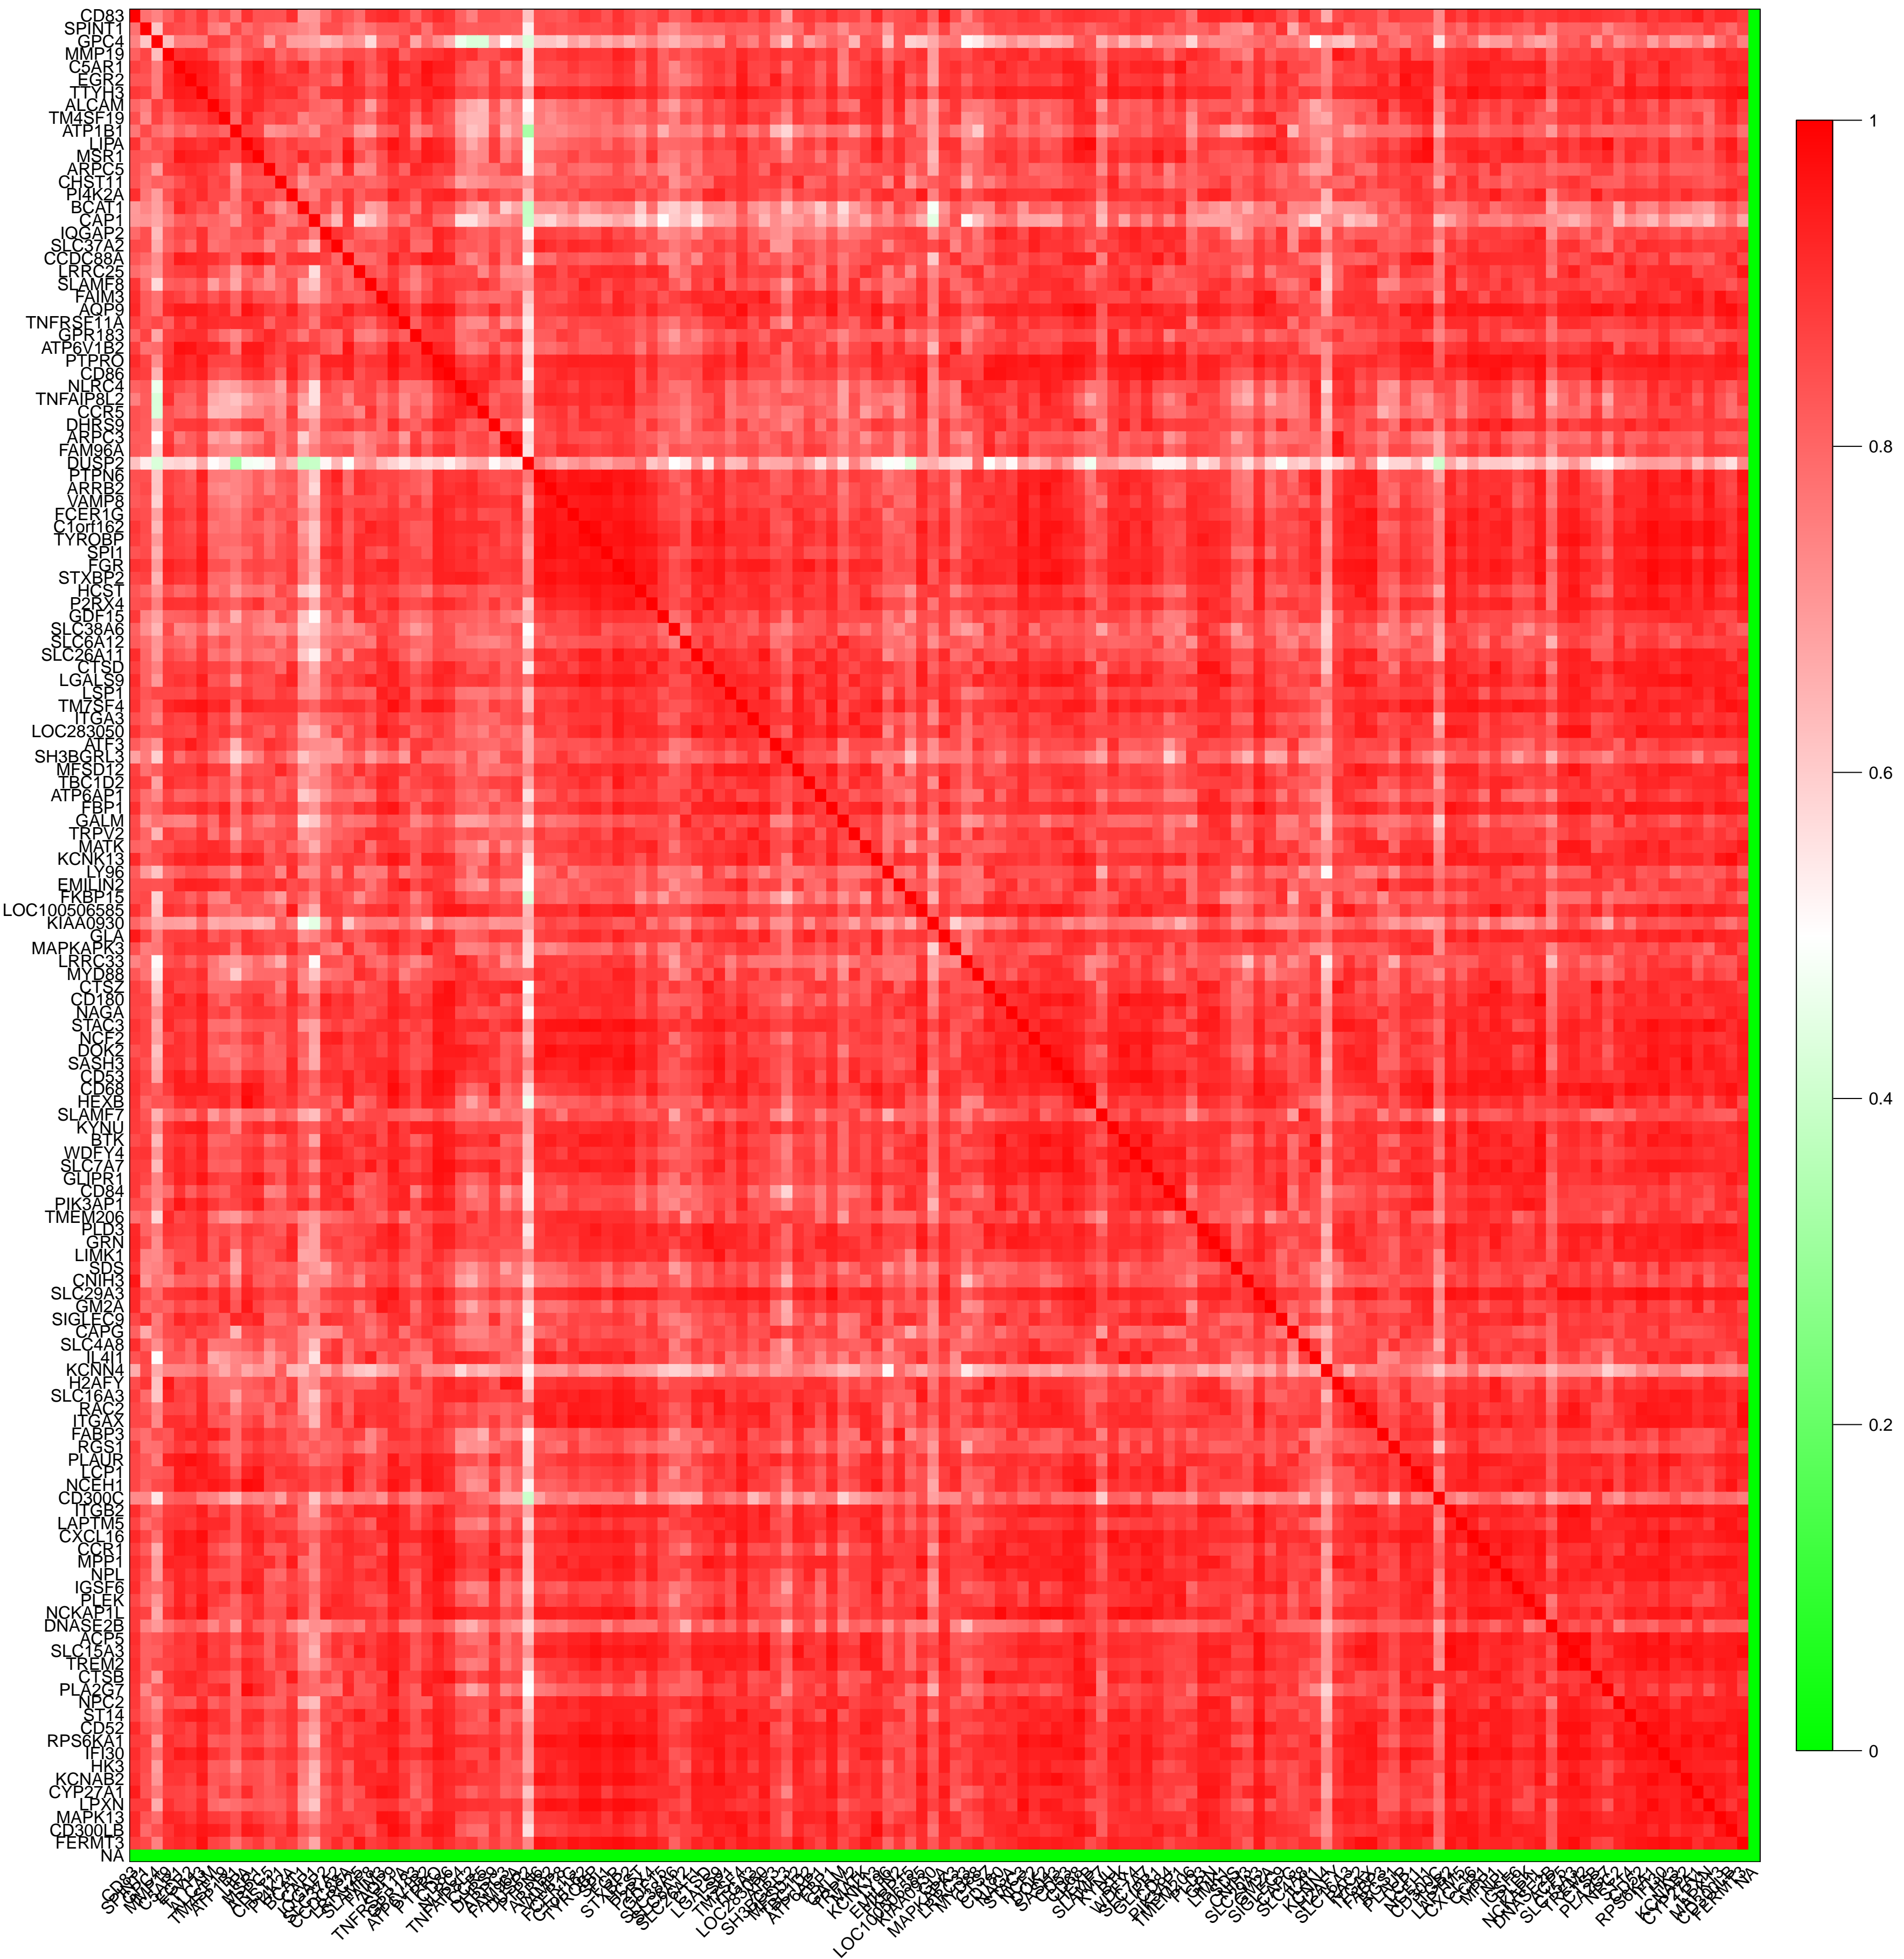

Supplement: pone.0125718.s001.pdf [file pone.0125718.s001.pdf]
