# Supplementary material for: Bariatric Surgery Induces Disruption in Inflammatory Signaling Pathways Mediated by Immune Cells in Adipose Tissue: A RNA-Seq Study
Source: PLoS One. 2015 May 4;10(5):e0125718. doi: 10.1371/journal.pone.0125718 (PMC4418598; doi:10.1371/journal.pone.0125718)
Supplement: S1 Table — (XLSX) [file pone.0125718.s007.xlsx]

## Sheet: Table S1
Table S1: Differential expression of genes 3 months after bariatric surgery. The time coefficient is estimated from a negative binomial regression adjusted for age, ethnicity, run, RIN and RNA concentration
OMIM Gene ID	Ensembl Gene ID	Time coefficient	P-value	FDR	counts T0	counts T3	Approved name
HNRNPA1	ENSG00000135486,ENSG00000135486	0.269095	1.46824e-11	2.35051e-07	7675	10508	heterogeneous nuclear ribonucleoprotein A1
STMN2	ENSG00000104435,ENSG00000104435	-2.48997	2.45885e-09	1.14689e-05	780	81	stathmin-like 2
TGM1	ENSG00000092295	-0.745263	2.78071e-09	1.14689e-05	145	75	transglutaminase 1
BCYRN1	ENSG00000236824	-0.792722	2.86561e-09	1.14689e-05	3390	1670	brain cytoplasmic RNA 1
ILF3	ENSG00000129351,ENSG00000129351,ENSG00000129351,ENSG00000129351,ENSG00000129351	0.124028	4.89641e-09	1.56773e-05	3907	4736	interleukin enhancer binding factor 3, 90kDa
HNRNPM	ENSG00000099783,ENSG00000099783	0.148491	1.65733e-08	4.42203e-05	2844	3512	heterogeneous nuclear ribonucleoprotein M
NPM1	ENSG00000181163,ENSG00000181163,ENSG00000181163	0.177979	2.14957e-08	4.91607e-05	6322	7777	nucleophosmin (nucleolar phosphoprotein B23, numatrin)
RPL26	ENSG00000161970	0.167802	3.14375e-08	5.51058e-05	11902	14968	ribosomal protein L26
HPD	ENSG00000158104,ENSG00000158104	-0.563424	3.28438e-08	5.51058e-05	102	63	4-hydroxyphenylpyruvate dioxygenase
IDO1	ENSG00000131203	-0.506086	3.44218e-08	5.51058e-05	267	181	indoleamine 2,3-dioxygenase 1
RPS23	ENSG00000186468	0.147322	4.12783e-08	6.00749e-05	10859	13188	ribosomal protein S23
P2RX6	ENSG00000099957,ENSG00000099957	-0.670152	4.57281e-08	6.10051e-05	702	394	purinergic receptor P2X, ligand-gated ion channel, 6
HNRNPA3	ENSG00000170144	0.131875	5.77731e-08	7.11454e-05	6011	7239	heterogeneous nuclear ribonucleoprotein A3
KHDRBS1	ENSG00000121774	0.12779	6.24962e-08	7.14644e-05	2678	3140	KH domain containing, RNA binding, signal transduction associated 1
HNRNPD	ENSG00000138668,ENSG00000138668,ENSG00000138668	0.0971388	1.44916e-07	0.000154664	3364	3882	heterogeneous nuclear ribonucleoprotein D (AU-rich element RNA binding protein 1, 37kDa)
HIST1H1C	ENSG00000187837	-0.36237	1.93796e-07	0.000168094	1004	744	histone cluster 1, H1c
EEF1A1	ENSG00000156508	0.145257	2.34895e-07	0.000168094	176658	214141	eukaryotic translation elongation factor 1 alpha 1
ASAH1	ENSG00000104763,ENSG00000104763,ENSG00000104763	-0.327701	2.37658e-07	0.000168094	28431	21141	N-acylsphingosine amidohydrolase (acid ceramidase) 1
SULT1A1	ENSG00000196502,ENSG00000196502,ENSG00000196502,ENSG00000196502	-0.334456	2.41275e-07	0.000168094	2005	1571	sulfotransferase family, cytosolic, 1A, phenol-preferring, member 1
RPL10A	ENSG00000198755	0.152327	2.43971e-07	0.000168094	8724	10808	ribosomal protein L10a
RSL1D1	ENSG00000171490	0.141088	2.51791e-07	0.000168094	2205	2649	ribosomal L1 domain containing 1
ABCC6	ENSG00000091262,ENSG00000091262	-0.402503	2.52754e-07	0.000168094	1361	979	ATP-binding cassette, sub-family C (CFTR/MRP), member 6
EIF4B	ENSG00000063046	0.194278	2.61734e-07	0.000168094	9156	11541	eukaryotic translation initiation factor 4B
CES1	ENSG00000198848,ENSG00000198848,ENSG00000198848	-0.539059	2.63656e-07	0.000168094	29996	18664	carboxylesterase 1
EIF3E	ENSG00000104408	0.133092	2.70863e-07	0.000168094	5294	6259	eukaryotic translation initiation factor 3, subunit E
RPL15	ENSG00000174748,ENSG00000174748,ENSG00000174748,ENSG00000174748,ENSG00000174748,ENSG00000174748	0.126331	2.72999e-07	0.000168094	19225	22714	ribosomal protein L15
SERPINF1	ENSG00000132386	-0.199072	3.29375e-07	0.000195295	21005	18277	serpin peptidase inhibitor, clade F (alpha-2 antiplasmin, pigment epithelium derived factor), member 1
RPL14	ENSG00000188846,ENSG00000188846	0.1723	3.59322e-07	0.000205442	9882	12273	ribosomal protein L14
C5orf42	ENSG00000197603	-0.223581	4.7139e-07	0.000260224	378	302	chromosome 5 open reading frame 42
CXorf69	ENSG00000184785	0.207687	5.00072e-07	0.000266014	277	354	NA
ARHGDIG	ENSG00000242173	-0.685178	5.15112e-07	0.000266014	209	131	Rho GDP dissociation inhibitor (GDI) gamma
SPTA1	ENSG00000163554	-0.602537	7.81886e-07	0.000391163	50	30	spectrin, alpha, erythrocytic 1 (elliptocytosis 2)
CALM2	ENSG00000143933	0.165437	9.03678e-07	0.000438394	10888	13319	calmodulin 2 (phosphorylase kinase, delta)
SMYD5	ENSG00000135632	0.152543	9.36956e-07	0.000441168	477	593	SMYD family member 5
KDELC2	ENSG00000178202	0.19089	9.79295e-07	0.000441872	1492	1835	KDEL (Lys-Asp-Glu-Leu) containing 2
SEC11A	ENSG00000140612	0.11022	9.93652e-07	0.000441872	3192	3717	SEC11 homolog A (S. cerevisiae)
NAP1L1	ENSG00000187109	0.177487	1.09351e-06	0.000473137	6693	8224	nucleosome assembly protein 1-like 1
WNT2B	ENSG00000134245,ENSG00000134245	-0.670581	1.2984e-06	0.000547004	215	118	wingless-type MMTV integration site family, member 2B
LOX	ENSG00000113083,ENSG00000113083	-0.415767	1.38688e-06	0.000569297	4105	2784	lysyl oxidase
MYH1	ENSG00000109061	-0.657217	1.51236e-06	0.000602852	176	99	myosin, heavy chain 1, skeletal muscle, adult
RPL22	ENSG00000116251	0.129036	1.54394e-06	0.000602852	10200	12178	ribosomal protein L22
HIST2H2BE	ENSG00000184678	-0.428745	1.65852e-06	0.00061543	299	207	histone cluster 2, H2be
INMT	ENSG00000241644,ENSG00000241644	-0.357485	1.66704e-06	0.00061543	699	525	indolethylamine N-methyltransferase
SSRP1	ENSG00000149136	0.0819542	1.70108e-06	0.00061543	1566	1812	structure specific recognition protein 1
RPL23	ENSG00000125691	0.146805	1.72992e-06	0.00061543	16300	19962	ribosomal protein L23
KLHL30	ENSG00000168427	-0.407345	1.79854e-06	0.00062593	509	376	kelch-like family member 30
AQP4	ENSG00000171885,ENSG00000171885	-1.51459	1.89454e-06	0.000634867	48	11	aquaporin 4
NACA	ENSG00000196531,ENSG00000196531	0.12562	1.94909e-06	0.000634867	11478	13732	nascent polypeptide-associated complex alpha subunit
RPL4	ENSG00000174444	0.121229	1.99695e-06	0.000634867	23561	28072	ribosomal protein L4
CKMT2	ENSG00000131730,ENSG00000131730,ENSG00000131730	-0.454226	2.04374e-06	0.000634867	348	239	creatine kinase, mitochondrial 2 (sarcomeric)
SULT1A2	ENSG00000197165,ENSG00000197165	-0.673143	2.05938e-06	0.000634867	410	225	sulfotransferase family, cytosolic, 1A, phenol-preferring, member 2
UNC13C	ENSG00000137766	-0.775189	2.06216e-06	0.000634867	71	35	unc-13 homolog C (C. elegans)
C6orf48	ENSG00000234728,ENSG00000226710,ENSG00000229300,ENSG00000204387,ENSG00000206380	0.146406	2.11442e-06	0.000638377	1890	2281	chromosome 6 open reading frame 48
EIF3H	ENSG00000147677	0.126433	2.15331e-06	0.000638377	3343	3953	eukaryotic translation initiation factor 3, subunit H
RPS6	ENSG00000137154	0.158491	2.23143e-06	0.000643792	20814	25807	ribosomal protein S6
CCDC162P	ENSG00000203799	-0.683962	2.28818e-06	0.000643792	59	33	coiled-coil domain containing 162, pseudogene
KLHL31	ENSG00000124743	-0.409447	2.29222e-06	0.000643792	2149	1499	kelch-like family member 31
RPL5	ENSG00000122406	0.118676	2.34361e-06	0.000646877	14632	17268	ribosomal protein L5
HSPA1A	ENSG00000235941,ENSG00000237724,ENSG00000234475,ENSG00000204389,ENSG00000215328	0.26547	2.39413e-06	0.000649621	3867	5282	heat shock 70kDa protein 1A
GPX1	ENSG00000233276,ENSG00000233276	-0.287213	2.4567e-06	0.000655489	23349	18801	glutathione peroxidase 1
RGS20	ENSG00000147509,ENSG00000147509	-0.480723	2.53112e-06	0.000662503	42	28	regulator of G-protein signaling 20
CSTA	ENSG00000121552	-0.288159	2.56576e-06	0.000662503	1001	778	cystatin A (stefin A)
LOXL2	ENSG00000134013	-0.275456	2.67766e-06	0.000670267	3658	2940	lysyl oxidase-like 2
TPT1	ENSG00000133112	0.126284	2.70757e-06	0.000670267	61667	73740	tumor protein, translationally-controlled 1
RPL30	ENSG00000156482	0.137341	2.72143e-06	0.000670267	15731	18958	ribosomal protein L30
SCD	ENSG00000099194	-1.0423	2.79301e-06	0.000677475	152860	55788	stearoyl-CoA desaturase (delta-9-desaturase)
RDH5	ENSG00000135437,ENSG00000135437	-0.273918	3.0105e-06	0.00071933	5399	4490	retinol dehydrogenase 5 (11-cis/9-cis)
PTPRZ1	ENSG00000106278,ENSG00000106278,ENSG00000106278	-1.31359	3.23316e-06	0.000760677	70	21	protein tyrosine phosphatase, receptor-type, Z polypeptide 1
CASQ2	ENSG00000118729	-0.497451	3.28759e-06	0.000760677	339	228	calsequestrin 2 (cardiac muscle)
SF3B3	ENSG00000189091	0.114154	3.33071e-06	0.000760677	1608	1883	splicing factor 3b, subunit 3, 130kDa
RPL38	ENSG00000172809,ENSG00000172809	0.144562	3.37361e-06	0.000760677	7230	8805	ribosomal protein L38
RPL23A	ENSG00000198242	0.140179	3.5736e-06	0.000766682	8540	10425	ribosomal protein L23a
NSA2	ENSG00000164346	0.127789	3.5744e-06	0.000766682	1630	1953	NSA2 ribosome biogenesis homolog (S. cerevisiae)
ALDOC	ENSG00000109107	-0.604559	3.58423e-06	0.000766682	5642	3280	aldolase C, fructose-bisphosphate
GJC3	ENSG00000176402	0.536609	3.59579e-06	0.000766682	11	19	gap junction protein, gamma 3, 30.2kDa
MEAF6	ENSG00000163875	0.0939008	3.67007e-06	0.000766682	954	1095	MYST/Esa1-associated factor 6
RPS15A	ENSG00000134419,ENSG00000134419	0.144955	3.71306e-06	0.000766682	10000	12285	ribosomal protein S15a
DKC1	ENSG00000130826,ENSG00000268226,ENSG00000130826	0.103272	3.73547e-06	0.000766682	613	711	dyskeratosis congenita 1, dyskerin
AOX1	ENSG00000138356	-0.340633	4.05314e-06	0.00082135	2671	1994	aldehyde oxidase 1
BTF3	ENSG00000145741,ENSG00000145741	0.107811	4.25466e-06	0.00085141	7309	8512	basic transcription factor 3
SFXN1	ENSG00000164466	-0.280921	4.41943e-06	0.000873465	425	335	sideroflexin 1
RPL37	ENSG00000145592	0.143797	4.55365e-06	0.000889017	10654	12989	ribosomal protein L37
LOC151009	NA	-0.240685	4.71025e-06	0.00090851	445	381	NA
PPP2R1B	ENSG00000137713,ENSG00000137713,ENSG00000137713,ENSG00000137713,ENSG00000137713	-0.237107	4.86503e-06	0.000927194	6752	5689	protein phosphatase 2, regulatory subunit A, beta
SRPX	ENSG00000101955,ENSG00000101955,ENSG00000101955,ENSG00000101955	0.323145	5.00365e-06	0.000942393	2629	3756	sushi-repeat containing protein, X-linked
APLNR	ENSG00000134817	-0.393568	5.13863e-06	0.000956563	3016	2205	apelin receptor
CCDC80	ENSG00000091986,ENSG00000091986	-0.303632	5.25299e-06	0.00096661	18252	14066	coiled-coil domain containing 80
DHCR24	ENSG00000116133	-0.482294	5.44505e-06	0.000990566	4478	2925	24-dehydrocholesterol reductase
SPARC	ENSG00000113140	-0.358856	5.58267e-06	0.00100336	213069	155707	secreted protein, acidic, cysteine-rich (osteonectin)
SLC22A12	ENSG00000197891,ENSG00000197891	-0.728255	5.64073e-06	0.00100336	108	56	solute carrier family 22 (organic anion/urate transporter), member 12
HBA1	ENSG00000206172	-1.60853	5.76097e-06	0.00101349	16311	5952	hemoglobin, alpha 1
RPS27	ENSG00000177954	0.182243	5.82584e-06	0.00101376	14842	18972	ribosomal protein S27
LOC730091	ENSG00000240875	-0.287354	5.95828e-06	0.00102566	168	140	NA
DTNB	ENSG00000138101,ENSG00000138101,ENSG00000138101,ENSG00000138101,ENSG00000138101,ENSG00000138101,ENSG00000138101,ENSG00000138101	0.1944	6.11775e-06	0.00102904	138	174	dystrobrevin, beta
COL5A2	ENSG00000204262	-0.228999	6.16767e-06	0.00102904	9118	7582	collagen, type V, alpha 2
SCN4B	ENSG00000177098,ENSG00000177098,ENSG00000177098	-0.341543	6.21187e-06	0.00102904	2931	2267	sodium channel, voltage-gated, type IV, beta subunit
PARP16	ENSG00000138617	0.121925	6.23504e-06	0.00102904	251	296	poly (ADP-ribose) polymerase family, member 16
LEP	ENSG00000174697	-0.44221	6.66129e-06	0.00108282	43650	30013	leptin
C7orf23	ENSG00000135185,ENSG00000135185	0.123426	6.6962e-06	0.00108282	534	628	NA
INO80	ENSG00000128908	0.0971537	6.83187e-06	0.00109371	813	934	INO80 homolog (S. cerevisiae)
PKD1L1	ENSG00000158683	-0.477081	6.94978e-06	0.00110157	236	158	polycystic kidney disease 1 like 1
PTMA	ENSG00000187514,ENSG00000187514	0.126564	7.29816e-06	0.00114545	18239	21491	prothymosin, alpha
KLHDC10	ENSG00000128607	-0.138644	7.42918e-06	0.0011547	1853	1663	kelch domain containing 10
ANP32A	ENSG00000140350	0.103015	7.54866e-06	0.00116199	2128	2484	acidic (leucine-rich) nuclear phosphoprotein 32 family, member A
CLU	ENSG00000120885	-0.270101	7.90099e-06	0.00120464	41547	33008	clusterin
HBA2	ENSG00000188536	-1.57822	8.05952e-06	0.00121722	41024	15870	hemoglobin, alpha 2
PCBP1	ENSG00000169564	0.11785	8.13645e-06	0.00121735	9119	10668	poly(rC) binding protein 1
NPY1R	ENSG00000164128	-0.411462	8.31976e-06	0.00123325	8519	6046	neuropeptide Y receptor Y1
H3F3B	ENSG00000132475	0.136722	8.44812e-06	0.00123561	7611	9094	H3 histone, family 3B (H3.3B)
SYNC	ENSG00000162520,ENSG00000162520	-0.300821	8.63099e-06	0.00123561	1119	886	syncoilin, intermediate filament protein
NHS	ENSG00000188158,ENSG00000188158	0.227986	8.6355e-06	0.00123561	212	272	Nance-Horan syndrome (congenital cataracts and dental anomalies)
MN1	ENSG00000169184	-0.327859	8.78613e-06	0.00123561	957	722	meningioma (disrupted in balanced translocation) 1
FAM171A2	ENSG00000161682	-0.542803	8.80781e-06	0.00123561	406	249	family with sequence similarity 171, member A2
ACOX3	ENSG00000087008,ENSG00000087008	-0.11758	8.8369e-06	0.00123561	506	478	acyl-CoA oxidase 3, pristanoyl
ACAT2	ENSG00000120437	-0.195259	8.87594e-06	0.00123561	473	414	acetyl-CoA acetyltransferase 2
EIF3L	ENSG00000100129,ENSG00000100129	0.115554	9.27026e-06	0.00127938	5738	6783	eukaryotic translation initiation factor 3, subunit L
TMEM18	ENSG00000151353	0.0952258	9.35338e-06	0.00127981	689	786	transmembrane protein 18
NEK6	ENSG00000119408,ENSG00000119408,ENSG00000119408,ENSG00000119408,ENSG00000119408,ENSG00000119408,ENSG00000119408	-0.172373	9.67423e-06	0.00130081	935	822	NIMA-related kinase 6
PDK4	ENSG00000004799	0.269935	9.67575e-06	0.00130081	10196	13521	pyruvate dehydrogenase kinase, isozyme 4
PRND	ENSG00000171864	-0.947073	9.75953e-06	0.00130081	83	36	prion protein 2 (dublet)
LOC148696	NA	-0.920325	9.83183e-06	0.00130081	13	5	NA
CYBASC3	ENSG00000162144,ENSG00000162144,ENSG00000162144	-0.195615	1.02219e-05	0.00133344	2405	2059	NA
PNMAL2	ENSG00000204851	-0.2675	1.02451e-05	0.00133344	753	611	paraneoplastic Ma antigen family-like 2
GLS	ENSG00000115419,ENSG00000115419	-0.180217	1.04484e-05	0.00134894	3652	3161	glutaminase
FAT2	ENSG00000086570	-0.460682	1.07853e-05	0.0013813	582	390	FAT atypical cadherin 2
PGRMC1	ENSG00000101856	0.156972	1.09798e-05	0.00139504	3549	4334	progesterone receptor membrane component 1
KLHDC8B	ENSG00000185909	-0.249336	1.1128e-05	0.00140274	2535	2071	kelch domain containing 8B
ATR	ENSG00000175054	-0.262948	1.12848e-05	0.00141139	954	756	ataxia telangiectasia and Rad3 related
ABCC6P2	ENSG00000255277	-0.707799	1.1406e-05	0.00141549	48	25	ATP-binding cassette, sub-family C, member 6 pseudogene 2
FAM124B	ENSG00000124019,ENSG00000124019	0.321847	1.17659e-05	0.00142841	109	158	family with sequence similarity 124B
LOC284751	ENSG00000203999	-0.31138	1.17761e-05	0.00142841	45	36	NA
GPR153	ENSG00000158292	0.309559	1.17777e-05	0.00142841	639	900	G protein-coupled receptor 153
HNRNPUL2	ENSG00000214753	0.0826265	1.20235e-05	0.00143842	2944	3365	heterogeneous nuclear ribonucleoprotein U-like 2
TRDMT1	ENSG00000107614	0.182661	1.204e-05	0.00143842	168	205	tRNA aspartic acid methyltransferase 1
FBLN7	ENSG00000144152,ENSG00000144152	0.305697	1.24062e-05	0.00147119	203	287	fibulin 7
SF3A3	ENSG00000183431	0.071854	1.27779e-05	0.00150413	1184	1342	splicing factor 3a, subunit 3, 60kDa
FADS2	ENSG00000134824	-0.998249	1.29727e-05	0.00151591	2508	1004	fatty acid desaturase 2
RPS3	ENSG00000149273,ENSG00000149273	0.127181	1.31259e-05	0.00152094	9078	10859	ribosomal protein S3
CCNI	ENSG00000118816	0.179799	1.32057e-05	0.00152094	3335	4077	cyclin I
DCHS2	ENSG00000197410,ENSG00000197410,ENSG00000197410	-0.868487	1.33048e-05	0.00152141	38	17	dachsous 2 (Drosophila)
LOC254896	NA	-0.681947	1.39613e-05	0.00158515	15	8	NA
GLRX	ENSG00000173221,ENSG00000173221,ENSG00000173221	-0.201344	1.44786e-05	0.00163231	1624	1399	glutaredoxin (thioltransferase)
LTF	ENSG00000012223,ENSG00000012223	-0.560731	1.46853e-05	0.00164403	334	213	lactotransferrin
GLB1	ENSG00000170266,ENSG00000170266,ENSG00000170266	-0.25991	1.48545e-05	0.00165143	1490	1189	galactosidase, beta 1
B4GALT6	ENSG00000118276	-0.557499	1.55473e-05	0.00171653	857	480	UDP-Gal:betaGlcNAc beta 1,4- galactosyltransferase, polypeptide 6
PCDP1	ENSG00000163075	-0.626447	1.58287e-05	0.00173563	99	55	NA
TMEM139	ENSG00000178826,ENSG00000178826,ENSG00000178826,ENSG00000178826,ENSG00000178826,ENSG00000178826,ENSG00000178826	-0.428549	1.60893e-05	0.00173922	246	180	transmembrane protein 139
GAS5	ENSG00000234741	0.207375	1.62371e-05	0.00173922	1560	2047	growth arrest-specific 5 (non-protein coding)
RPS25	ENSG00000118181	0.14683	1.62557e-05	0.00173922	14532	17874	ribosomal protein S25
MAOB	ENSG00000069535	0.228094	1.6296e-05	0.00173922	2987	3904	monoamine oxidase B
TP53INP2	ENSG00000078804	-0.196763	1.66847e-05	0.00176389	949	822	tumor protein p53 inducible nuclear protein 2
MED30	ENSG00000164758	0.147732	1.67476e-05	0.00176389	232	280	mediator complex subunit 30
SFRP2	ENSG00000145423	-0.843117	1.70047e-05	0.00177691	4203	1790	secreted frizzled-related protein 2
FUS	ENSG00000089280,ENSG00000089280,ENSG00000089280	0.166818	1.70931e-05	0.00177691	2803	3551	fused in sarcoma
ANKRD30A	ENSG00000148513	-0.81554	1.99591e-05	0.00206145	43	19	ankyrin repeat domain 30A
DUSP14	ENSG00000161326	-0.287625	2.04012e-05	0.00209361	1224	961	dual specificity phosphatase 14
PCBP2	ENSG00000197111,ENSG00000197111,ENSG00000197111,ENSG00000197111,ENSG00000197111,ENSG00000197111,ENSG00000197111	0.109842	2.05935e-05	0.00209988	9962	11566	poly(rC) binding protein 2
SREBF2	ENSG00000198911	-0.167883	2.08391e-05	0.00211147	1640	1513	sterol regulatory element binding transcription factor 2
PA2G4	ENSG00000170515	0.0972778	2.20393e-05	0.00221043	2416	2792	proliferation-associated 2G4, 38kDa
NLRX1	ENSG00000160703,ENSG00000160703	-0.13485	2.20919e-05	0.00221043	1054	981	NLR family member X1
ACSL5	ENSG00000197142,ENSG00000197142,ENSG00000197142	0.145374	2.29838e-05	0.00228539	1042	1255	acyl-CoA synthetase long-chain family member 5
RPL7	ENSG00000147604	0.134196	2.31635e-05	0.00228904	17881	21800	ribosomal protein L7
RPS16	ENSG00000105193	0.150808	2.34609e-05	0.00230156	12199	14984	ribosomal protein S16
ACVR1	ENSG00000115170,ENSG00000115170	0.112468	2.35777e-05	0.00230156	608	694	activin A receptor, type I
FREM1	ENSG00000164946,ENSG00000164946	-0.212141	2.44889e-05	0.00237602	1075	897	FRAS1 related extracellular matrix 1
EIF1	ENSG00000173812	0.109804	2.4897e-05	0.00240106	11130	12963	eukaryotic translation initiation factor 1
FBLN2	ENSG00000163520,ENSG00000163520,ENSG00000163520	-0.247966	2.5241e-05	0.00241966	21692	17785	fibulin 2
RPL41	ENSG00000229117,ENSG00000229117	0.140325	2.63383e-05	0.00250147	26770	32656	ribosomal protein L41
ZBED6	ENSG00000257315	-1.39487	2.64069e-05	0.00250147	131	26	zinc finger, BED-type containing 6
INSIG1	ENSG00000186480,ENSG00000186480,ENSG00000186480	-0.501163	2.77089e-05	0.00260936	3012	1892	insulin induced gene 1
NQO1	ENSG00000181019,ENSG00000181019,ENSG00000181019	-0.379021	2.81323e-05	0.00262242	10704	7786	NAD(P)H dehydrogenase, quinone 1
EPB41L3	ENSG00000082397	0.139446	2.82493e-05	0.00262242	1469	1747	erythrocyte membrane protein band 4.1-like 3
RPL32	ENSG00000144713,ENSG00000144713,ENSG00000144713	0.126992	2.8339e-05	0.00262242	14240	17011	ribosomal protein L32
TUSC1	ENSG00000198680	0.122993	2.88966e-05	0.00265281	677	799	tumor suppressor candidate 1
SLC30A4	ENSG00000104154	-0.236385	2.90734e-05	0.00265281	94	73	solute carrier family 30 (zinc transporter), member 4
HNRNPR	ENSG00000125944,ENSG00000125944,ENSG00000125944,ENSG00000125944	0.137508	2.91645e-05	0.00265281	1830	2173	heterogeneous nuclear ribonucleoprotein R
HNRNPUL1	ENSG00000105323	0.11081	2.94793e-05	0.00266629	4362	5056	heterogeneous nuclear ribonucleoprotein U-like 1
COX4I2	ENSG00000131055	-0.293318	3.00223e-05	0.00270015	503	419	cytochrome c oxidase subunit IV isoform 2 (lung)
ZFAT	ENSG00000066827,ENSG00000066827,ENSG00000066827,ENSG00000066827,ENSG00000066827,ENSG00000066827	-0.446749	3.05888e-05	0.00271412	553	366	zinc finger and AT hook domain containing
CLCA2	ENSG00000137975	-0.627215	3.06366e-05	0.00271412	137	76	chloride channel accessory 2
MECR	ENSG00000116353,ENSG00000116353	-0.261863	3.06863e-05	0.00271412	956	774	mitochondrial trans-2-enoyl-CoA reductase
LOH12CR2	ENSG00000205791	-0.292681	3.08557e-05	0.00271412	138	110	loss of heterozygosity, 12, chromosomal region 2 (non-protein coding)
ABCA1	ENSG00000165029	0.197639	3.18261e-05	0.00278417	2726	3235	ATP-binding cassette, sub-family A (ABC1), member 1
YTHDC1	ENSG00000083896,ENSG00000083896	0.100062	3.20022e-05	0.00278436	1709	1988	YTH domain containing 1
RPL19	ENSG00000108298	0.122626	3.33414e-05	0.0028852	16800	20020	ribosomal protein L19
CNTN6	ENSG00000134115	-0.882824	3.5156e-05	0.00302587	69	32	contactin 6
CENPV	ENSG00000166582	0.274323	3.58556e-05	0.00306958	162	228	centromere protein V
KCTD2	ENSG00000180901	0.122294	3.61412e-05	0.00307612	943	1128	potassium channel tetramerization domain containing 2
SFRP4	ENSG00000106483	-0.553991	3.63163e-05	0.00307612	2823	1790	secreted frizzled-related protein 4
CFH	ENSG00000000971,ENSG00000000971	-0.371098	3.73787e-05	0.00314945	5739	4228	complement factor H
ANKRD49	ENSG00000168876	0.106084	3.78708e-05	0.00315611	254	290	ankyrin repeat domain 49
EEF1B2	ENSG00000114942,ENSG00000114942,ENSG00000114942	0.0964817	3.80165e-05	0.00315611	4503	5237	eukaryotic translation elongation factor 1 beta 2
DUT	ENSG00000128951,ENSG00000128951,ENSG00000128951	0.101081	3.80491e-05	0.00315611	2030	2396	deoxyuridine triphosphatase
CDC20	ENSG00000117399	-0.551774	3.89918e-05	0.00321212	112	70	cell division cycle 20
LOC100506100	ENSG00000223478	-0.350242	3.91257e-05	0.00321212	45	33	NA
SNHG6	ENSG00000245910,ENSG00000245910	0.128347	3.93789e-05	0.00321393	1800	2140	small nucleolar RNA host gene 6 (non-protein coding)
ATOH8	ENSG00000168874	0.323871	3.95493e-05	0.00321393	1405	2066	atonal homolog 8 (Drosophila)
RNF168	ENSG00000163961	0.145993	3.97916e-05	0.00321729	552	656	ring finger protein 168, E3 ubiquitin protein ligase
ENC1	ENSG00000171617,ENSG00000171617	-0.288662	4.04413e-05	0.00325339	821	642	ectodermal-neural cortex 1 (with BTB domain)
ENPEP	ENSG00000138792	-0.267198	4.07203e-05	0.00325945	894	738	glutamyl aminopeptidase (aminopeptidase A)
ZNF541	ENSG00000118156	-0.258142	4.39643e-05	0.00350162	184	153	zinc finger protein 541
RPL36A	ENSG00000241343	0.171468	4.4286e-05	0.00350977	6080	7675	ribosomal protein L36a
OPRK1	ENSG00000082556	-0.651689	4.45529e-05	0.00351353	59	32	opioid receptor, kappa 1
ACOX1	ENSG00000161533,ENSG00000161533,ENSG00000161533	-0.244543	4.5547e-05	0.00357432	5065	4143	acyl-CoA oxidase 1, palmitoyl
CCDC125	ENSG00000183323	-0.18224	4.62199e-05	0.00360944	399	357	coiled-coil domain containing 125
PRDX2	ENSG00000167815,ENSG00000167815	-0.225227	4.69428e-05	0.00364809	5369	4536	peroxiredoxin 2
DHDDS	ENSG00000117682,ENSG00000117682	-0.207056	4.77652e-05	0.00369408	4283	3664	dehydrodolichyl diphosphate synthase
FAM84B	ENSG00000168672	0.184744	4.99033e-05	0.00384087	887	1110	family with sequence similarity 84, member B
CYB5R2	ENSG00000166394	0.139558	5.03165e-05	0.00385415	124	148	cytochrome b5 reductase 2
LRRCC1	ENSG00000133739	0.15018	5.09669e-05	0.00386754	245	290	leucine rich repeat and coiled-coil centrosomal protein 1
ABCC3	ENSG00000108846,ENSG00000108846	-0.470946	5.09745e-05	0.00386754	1503	983	ATP-binding cassette, sub-family C (CFTR/MRP), member 3
GLTSCR2	ENSG00000105373	0.163903	5.16223e-05	0.00389822	7193	8971	glioma tumor suppressor candidate region gene 2
RSL24D1	ENSG00000137876	0.105391	5.2522e-05	0.00394753	1595	1840	ribosomal L24 domain containing 1
BCL6B	ENSG00000161940	-0.219813	5.30587e-05	0.00396924	1209	1034	B-cell CLL/lymphoma 6, member B
RPL35A	ENSG00000182899	0.115466	5.33409e-05	0.00397179	9254	10988	ribosomal protein L35a
RANBP3L	ENSG00000164188,ENSG00000164188	-0.437901	5.38108e-05	0.00398823	165	107	RAN binding protein 3-like
TCTA	ENSG00000145022	-0.14692	5.40974e-05	0.00399099	1680	1544	T-cell leukemia translocation altered
SEMA3C	ENSG00000075223	-0.352693	5.44734e-05	0.0040003	7018	4812	sema domain, immunoglobulin domain (Ig), short basic domain, secreted, (semaphorin) 3C
TMTC4	ENSG00000125247,ENSG00000125247	0.141872	5.52032e-05	0.00403538	241	288	transmembrane and tetratricopeptide repeat containing 4
IFRD1	ENSG00000006652,ENSG00000006652,ENSG00000006652,ENSG00000006652	-0.213912	5.55566e-05	0.00404275	1836	1571	interferon-related developmental regulator 1
CD200	ENSG00000091972,ENSG00000091972	-0.216221	5.69151e-05	0.00412287	458	389	CD200 molecule
JAKMIP3	ENSG00000188385	-0.320464	5.78468e-05	0.00415968	125	98	Janus kinase and microtubule interacting protein 3
RTN4RL1	ENSG00000185924	0.229921	5.81279e-05	0.00415968	300	392	reticulon 4 receptor-like 1
ZNF22	ENSG00000165512	0.111398	5.82028e-05	0.00415968	1089	1267	zinc finger protein 22
PEX7	ENSG00000112357	0.123341	5.98459e-05	0.0042581	174	202	peroxisomal biogenesis factor 7
PTGES3	ENSG00000110958	0.113306	6.40264e-05	0.00453539	4221	4907	prostaglandin E synthase 3 (cytosolic)
SNRPB	ENSG00000125835,ENSG00000125835	0.0979213	6.46104e-05	0.00454592	1583	1823	small nuclear ribonucleoprotein polypeptides B and B1
RPL31	ENSG00000071082,ENSG00000071082,ENSG00000071082	0.12138	6.47867e-05	0.00454592	13907	16683	ribosomal protein L31
HIST1H4H	ENSG00000158406,ENSG00000158406	-0.674467	6.5027e-05	0.00454592	16	9	histone cluster 1, H4h
KLF11	ENSG00000172059,ENSG00000172059,ENSG00000172059	0.161268	6.55836e-05	0.00456491	1671	2024	Kruppel-like factor 11
TCEA3	ENSG00000204219	0.264246	6.59196e-05	0.00456843	333	451	transcription elongation factor A (SII), 3
RPS18	ENSG00000231500	0.115798	6.68216e-05	0.00460393	19436	22991	ribosomal protein S18
GSTK1	ENSG00000197448,ENSG00000197448,ENSG00000197448,ENSG00000197448	-0.0786602	6.72475e-05	0.00460393	4685	4643	glutathione S-transferase kappa 1
NOL7	ENSG00000225921	0.100279	6.72947e-05	0.00460393	814	940	nucleolar protein 7, 27kDa
GPRC5C	ENSG00000170412,ENSG00000170412	-0.275867	6.78972e-05	0.00461093	412	344	G protein-coupled receptor, family C, group 5, member C
RPS8	ENSG00000142937	0.142676	6.7973e-05	0.00461093	15820	19234	ribosomal protein S8
DBI	ENSG00000155368,ENSG00000155368,ENSG00000155368,ENSG00000155368,ENSG00000155368	-0.288098	6.95013e-05	0.00469471	7298	5730	diazepam binding inhibitor (GABA receptor modulator, acyl-CoA binding protein)
SLC35G1	ENSG00000176273,ENSG00000176273	-0.520047	7.01446e-05	0.00471825	142	88	solute carrier family 35, member G1
MTCH1	ENSG00000137409	0.0722826	7.07077e-05	0.00473623	4066	4637	mitochondrial carrier 1
ABCC1	ENSG00000103222	-0.142166	7.2122e-05	0.00481084	1281	1165	ATP-binding cassette, sub-family C (CFTR/MRP), member 1
FADS1	ENSG00000149485	-0.840399	7.25248e-05	0.00481763	1889	896	fatty acid desaturase 1
GLIS3	ENSG00000107249,ENSG00000107249	0.212162	7.30342e-05	0.00482533	82	104	GLIS family zinc finger 3
CES1P1	ENSG00000228695	-0.529146	7.32435e-05	0.00482533	247	166	carboxylesterase 1 pseudogene 1
CECR5	ENSG00000069998,ENSG00000069998	0.0902808	7.43843e-05	0.0048759	502	585	cat eye syndrome chromosome region, candidate 5
PEG10	ENSG00000242265,ENSG00000242265,ENSG00000242265,ENSG00000242265,ENSG00000242265,ENSG00000242265	-0.320957	7.46261e-05	0.0048759	733	551	paternally expressed 10
DLEC1	ENSG00000008226,ENSG00000008226	-0.491495	7.49531e-05	0.0048759	266	186	deleted in lung and esophageal cancer 1
HNRNPH3	ENSG00000096746,ENSG00000096746	0.109033	7.52294e-05	0.0048759	2610	3080	heterogeneous nuclear ribonucleoprotein H3 (2H9)
PSME1	ENSG00000092010,ENSG00000092010	0.0879115	7.57478e-05	0.00488971	2550	2917	proteasome (prosome, macropain) activator subunit 1 (PA28 alpha)
IGLON5	ENSG00000142549	0.526562	7.76094e-05	0.00497026	17	30	IgLON family member 5
LACE1	ENSG00000135537	-0.361751	7.76167e-05	0.00497026	117	83	lactation elevated 1
EIF2AK1	ENSG00000086232,ENSG00000086232	-0.0922394	7.82029e-05	0.00498759	2724	2606	eukaryotic translation initiation factor 2-alpha kinase 1
PLOD2	ENSG00000152952,ENSG00000152952	-0.239947	7.85104e-05	0.00498759	5947	4795	procollagen-lysine, 2-oxoglutarate 5-dioxygenase 2
SIAH1	ENSG00000196470,ENSG00000196470	0.113423	8.20669e-05	0.00519292	837	974	siah E3 ubiquitin protein ligase 1
COL11A1	ENSG00000060718,ENSG00000060718,ENSG00000060718,ENSG00000060718	-1.12684	8.27854e-05	0.00521776	457	151	collagen, type XI, alpha 1
RPS4X	ENSG00000198034	0.12297	8.40825e-05	0.00527873	20452	24377	ribosomal protein S4, X-linked
RPS12	ENSG00000112306	0.116198	8.49877e-05	0.00531472	15971	19033	ribosomal protein S12
HABP4	ENSG00000130956	0.163734	8.60739e-05	0.0053617	1057	1337	hyaluronan binding protein 4
RGAG4	ENSG00000242732	0.113614	9.0588e-05	0.00560231	269	311	retrotransposon gag domain containing 4
SPINK5	ENSG00000133710,ENSG00000133710,ENSG00000133710	-0.685874	9.08118e-05	0.00560231	41	23	serine peptidase inhibitor, Kazal type 5
STK38	ENSG00000112079	-0.12159	9.09863e-05	0.00560231	2050	1935	serine/threonine kinase 38
LINC00341	ENSG00000229645	0.150695	9.16252e-05	0.00562003	1873	2393	long intergenic non-protein coding RNA 341
WDR82	ENSG00000164091	0.0921235	9.26143e-05	0.00562241	2494	2838	WD repeat domain 82
TCEANC2	ENSG00000116205	-0.166636	9.27389e-05	0.00562241	243	212	transcription elongation factor A (SII) N-terminal and central domain containing 2
RPL17	ENSG00000215472,ENSG00000215472,ENSG00000265681,ENSG00000265681,ENSG00000265681,ENSG00000265681,ENSG00000265681	0.118212	9.30483e-05	0.00562241	12001	14317	ribosomal protein L17
RANGRF	ENSG00000108961,ENSG00000108961,ENSG00000108961	0.126394	9.31648e-05	0.00562241	531	639	RAN guanine nucleotide release factor
PLK2	ENSG00000145632	-0.222769	9.36613e-05	0.00562241	916	792	polo-like kinase 2
UNK	ENSG00000132478	0.1335	9.39248e-05	0.00562241	789	972	unkempt homolog (Drosophila)
CXCL14	ENSG00000145824	-0.329139	9.41225e-05	0.00562241	9617	7564	chemokine (C-X-C motif) ligand 14
RPS17	ENSG00000184779	0.120842	9.74125e-05	0.0057675	7826	9403	ribosomal protein S17
RPS17L	ENSG00000182774	0.120842	9.74125e-05	0.0057675	7826	9403	ribosomal protein S17-like
ADAMTS12	ENSG00000151388	-0.238561	9.76322e-05	0.0057675	431	347	ADAM metallopeptidase with thrombospondin type 1 motif, 12
DEK	ENSG00000124795,ENSG00000124795	0.12522	9.88947e-05	0.00581548	1960	2262	DEK oncogene
TUBB	ENSG00000224156,ENSG00000235067,ENSG00000232575,ENSG00000196230,ENSG00000232421,ENSG00000229684,ENSG00000183311,ENSG00000227739	0.183361	9.92178e-05	0.00581548	11351	14387	tubulin, beta class I
C8orf40	ENSG00000176209,ENSG00000176209,ENSG00000176209,ENSG00000176209	0.111859	9.95342e-05	0.00581548	972	1129	NA
SH3BGR	ENSG00000185437,ENSG00000185437	-0.22515	0.000100236	0.0058352	191	161	SH3 domain binding glutamic acid-rich protein
RPL34	ENSG00000109475,ENSG00000109475	0.118823	0.000100719	0.00584206	8848	10511	ribosomal protein L34
C1GALT1	ENSG00000106392	-0.200747	0.0001023	0.00591234	1004	840	core 1 synthase, glycoprotein-N-acetylgalactosamine 3-beta-galactosyltransferase, 1
RPS7	ENSG00000171863	0.11306	0.000104305	0.00600652	11880	14136	ribosomal protein S7
RPL11	ENSG00000142676,ENSG00000142676	0.135379	0.000104987	0.0060088	15700	19121	ribosomal protein L11
ANKRD53	ENSG00000144031,ENSG00000144031	0.36378	0.000105095	0.0060088	90	138	ankyrin repeat domain 53
WDR92	ENSG00000243667,ENSG00000243667	-0.181467	0.000108147	0.00616129	366	323	WD repeat domain 92
RCN1	ENSG00000049449	0.0813528	0.000108629	0.00616684	3713	4260	reticulocalbin 1, EF-hand calcium binding domain
NPTXR	ENSG00000221890	-0.240974	0.000109724	0.00618969	367	296	neuronal pentraxin receptor
GPLD1	ENSG00000112293,ENSG00000112293	-0.293036	0.000110243	0.00618969	445	337	glycosylphosphatidylinositol specific phospholipase D1
EIF4EBP2	ENSG00000148730	0.159234	0.000110419	0.00618969	7989	9702	eukaryotic translation initiation factor 4E binding protein 2
TMEM66	ENSG00000133872	0.09705	0.000110578	0.00618969	4774	5410	transmembrane protein 66
GCC2	ENSG00000135968	-0.133981	0.000111374	0.00621248	941	820	GRIP and coiled-coil domain containing 2
AKR1C2	ENSG00000151632,ENSG00000151632,ENSG00000265231,ENSG00000151632,ENSG00000265231	-0.280747	0.000112485	0.00625266	24044	19522	aldo-keto reductase family 1, member C2
THBS4	ENSG00000113296	-0.610265	0.000113202	0.00627079	4189	2431	thrombospondin 4
RPL27	ENSG00000131469	0.125688	0.000113888	0.00628698	10781	13107	ribosomal protein L27
PCDH12	ENSG00000113555	-0.255495	0.00011498	0.00632546	987	835	protocadherin 12
LNP1	ENSG00000206535	0.270246	0.000115579	0.00633667	43	59	leukemia NUP98 fusion partner 1
ZCCHC6	ENSG00000083223,ENSG00000083223,ENSG00000083223	-0.12438	0.000117237	0.00640564	518	463	zinc finger, CCHC domain containing 6
TOP1MT	ENSG00000184428	0.183294	0.000118408	0.00644119	299	381	topoisomerase (DNA) I, mitochondrial
CES4A	ENSG00000172824,ENSG00000172824,ENSG00000172824	-0.293973	0.000118693	0.00644119	161	132	carboxylesterase 4A
MATN2	ENSG00000132561,ENSG00000132561	0.169074	0.000120013	0.00649086	2511	3107	matrilin 2
ADH4	ENSG00000198099	-0.531589	0.000122359	0.00659541	22	14	alcohol dehydrogenase 4 (class II), pi polypeptide
VAT1	ENSG00000108828	0.141935	0.00012328	0.00662278	7769	9368	vesicle amine transport protein 1 homolog (T. californica)
WIPI1	ENSG00000070540	-0.161012	0.000123736	0.00662506	1185	1067	WD repeat domain, phosphoinositide interacting 1
AKR1C1	ENSG00000187134,ENSG00000266592	-0.243569	0.000126782	0.00676554	14830	12543	aldo-keto reductase family 1, member C1
SNRPB2	ENSG00000125870,ENSG00000125870	0.0598923	0.000128196	0.00681826	959	1060	small nuclear ribonucleoprotein polypeptide B
FMOD	ENSG00000122176	-0.417237	0.000130045	0.00689366	15384	10571	fibromodulin
RPL10	ENSG00000147403	0.120643	0.000133199	0.00703756	26809	32028	ribosomal protein L10
GSTM1	ENSG00000134184,ENSG00000134184	-0.234335	0.000136042	0.00714298	2084	1808	glutathione S-transferase mu 1
SLC15A4	ENSG00000139370	0.0782532	0.000136086	0.00714298	843	949	solute carrier family 15, member 4
RPS13	ENSG00000110700	0.120149	0.000138112	0.00719958	11681	13953	ribosomal protein S13
FRZB	ENSG00000162998	-0.474159	0.000139074	0.00719958	454	309	frizzled-related protein
AEBP1	ENSG00000106624	0.158694	0.000139174	0.00719958	5843	7249	AE binding protein 1
SPON1	ENSG00000262655	0.199945	0.000139262	0.00719958	2362	2986	spondin 1, extracellular matrix protein
HYI	ENSG00000178922,ENSG00000178922,ENSG00000178922	0.215275	0.000139413	0.00719958	1267	1691	hydroxypyruvate isomerase (putative)
LAMB2	ENSG00000172037	-0.144864	0.000140665	0.00720736	14746	13742	laminin, beta 2 (laminin S)
KCNA5	ENSG00000130037	-0.512746	0.000140928	0.00720736	24	15	potassium voltage-gated channel, shaker-related subfamily, member 5
LGALS8	ENSG00000116977,ENSG00000116977	-0.103512	0.000141	0.00720736	2945	2760	lectin, galactoside-binding, soluble, 8
ST6GALNAC6	ENSG00000160408	0.14515	0.000141486	0.00720736	4721	5773	ST6 (alpha-N-acetyl-neuraminyl-2,3-beta-galactosyl-1,3)-N-acetylgalactosaminide alpha-2,6-sialyltransferase 6
CWC15	ENSG00000261974	0.0675017	0.000141938	0.00720736	1039	1171	CWC15 spliceosome-associated protein homolog (S. cerevisiae)
C1orf198	ENSG00000119280,ENSG00000119280,ENSG00000119280	-0.295708	0.000142265	0.00720736	5546	4316	chromosome 1 open reading frame 198
MXRA5	ENSG00000101825	-0.68077	0.000144995	0.00732246	4324	2169	matrix-remodelling associated 5
CDH6	ENSG00000113361	-0.403743	0.000145667	0.00733329	360	268	cadherin 6, type 2, K-cadherin (fetal kidney)
COL4A1	ENSG00000187498	-0.192833	0.000147013	0.00735828	34641	30175	collagen, type IV, alpha 1
LINC00263	ENSG00000235823	-0.547746	0.000147083	0.00735828	142	81	long intergenic non-protein coding RNA 263
RAF1	ENSG00000132155	0.0410577	0.000150651	0.0075133	1937	2117	v-raf-1 murine leukemia viral oncogene homolog 1
CCND1	ENSG00000110092	-0.267298	0.000151616	0.00753796	8727	7160	cyclin D1
LRRC43	ENSG00000158113,ENSG00000158113	-0.337815	0.000152945	0.00755725	27	21	leucine rich repeat containing 43
TSPO	ENSG00000100300,ENSG00000100300,ENSG00000100300	-0.195119	0.000152948	0.00755725	8208	7318	translocator protein (18kDa)
PPAP2A	ENSG00000067113,ENSG00000067113	-0.225831	0.000154433	0.00760711	10021	8258	phosphatidic acid phosphatase type 2A
GUCY1A3	ENSG00000164116,ENSG00000164116,ENSG00000164116,ENSG00000164116,ENSG00000164116,ENSG00000164116,ENSG00000164116	-0.197812	0.00015537	0.00762979	1103	924	guanylate cyclase 1, soluble, alpha 3
RPL21P28	ENSG00000213860	0.148718	0.000156405	0.00764904	6752	8246	ribosomal protein L21 pseudogene 28
FCHSD2	ENSG00000137478	0.128046	0.000156717	0.00764904	1056	1248	FCH and double SH3 domains 2
CHST1	ENSG00000175264	-0.451717	0.00015799	0.00768773	114	80	carbohydrate (keratan sulfate Gal-6) sulfotransferase 1
TCOF1	ENSG00000070814,ENSG00000070814,ENSG00000070814,ENSG00000070814,ENSG00000070814,ENSG00000070814	0.0840106	0.000159344	0.00770369	684	792	Treacher Collins-Franceschetti syndrome 1
FICD	ENSG00000198855	-0.21306	0.000159666	0.00770369	115	96	FIC domain containing
SLC6A2	ENSG00000103546,ENSG00000103546,ENSG00000103546,ENSG00000103546	0.422986	0.000159762	0.00770369	82	128	solute carrier family 6 (neurotransmitter transporter, noradrenalin), member 2
IL20RA	ENSG00000016402	0.392077	0.000161154	0.00774749	17	26	interleukin 20 receptor, alpha
SDC3	ENSG00000162512	0.147403	0.000167198	0.00800574	2976	3598	syndecan 3
LOC219347	ENSG00000230091,ENSG00000230091,ENSG00000230091,ENSG00000230091,ENSG00000230091	-0.244136	0.000167526	0.00800574	187	154	NA
MSC	ENSG00000178860	-0.400586	0.000171248	0.00814306	1141	804	musculin
TMEM155	ENSG00000164112	-0.606665	0.000172164	0.00814306	39	24	transmembrane protein 155
LZTFL1	ENSG00000163818	-0.143765	0.000172228	0.00814306	543	481	leucine zipper transcription factor-like 1
GNS	ENSG00000135677	-0.14324	0.000172944	0.00814306	13749	12121	glucosamine (N-acetyl)-6-sulfatase
ADAM32	ENSG00000197140	-0.185371	0.000173009	0.00814306	73	65	ADAM metallopeptidase domain 32
ELMOD3	ENSG00000115459,ENSG00000115459,ENSG00000115459,ENSG00000115459	-0.176925	0.000173451	0.00814306	5054	4604	ELMO/CED-12 domain containing 3
HSPA1B	ENSG00000204388	0.184572	0.000175523	0.00821623	2075	2598	heat shock 70kDa protein 1B
QPRT	ENSG00000103485	-0.473189	0.00017885	0.00834756	202	132	quinolinate phosphoribosyltransferase
TMEM189	ENSG00000240849,ENSG00000240849	-0.18065	0.00018048	0.00839913	1802	1576	transmembrane protein 189
AKR1C3	ENSG00000265685,ENSG00000196139,ENSG00000196139	-0.30793	0.000182854	0.00848494	10256	8099	aldo-keto reductase family 1, member C3
LURAP1L	ENSG00000153714	-0.258016	0.000185798	0.00859666	670	533	leucine rich adaptor protein 1-like
PHF2	ENSG00000197724	0.0929843	0.000189616	0.00874801	1388	1586	PHD finger protein 2
ANXA2	ENSG00000182718,ENSG00000182718,ENSG00000182718,ENSG00000182718	-0.101264	0.000190527	0.00876477	47149	45359	annexin A2
IRAK2	ENSG00000134070	0.239177	0.000192094	0.00881155	180	230	interleukin-1 receptor-associated kinase 2
SF3B2	ENSG00000087365	0.0878465	0.000193362	0.00884436	3644	4218	splicing factor 3b, subunit 2, 145kDa
FAM151B	ENSG00000152380	-0.316328	0.000195143	0.00890041	33	25	family with sequence similarity 151, member B
CCDC96	ENSG00000173013	-0.158451	0.000196373	0.00893108	55	51	coiled-coil domain containing 96
FAU	ENSG00000149806	0.13227	0.000197271	0.00894647	7643	9242	Finkel-Biskis-Reilly murine sarcoma virus (FBR-MuSV) ubiquitously expressed
LRRTM4	ENSG00000176204,ENSG00000176204	-0.926758	0.000198511	0.00896145	23	9	leucine rich repeat transmembrane neuronal 4
PM20D1	ENSG00000162877	0.421115	0.00019872	0.00896145	23	37	peptidase M20 domain containing 1
TMEM132C	ENSG00000181234	0.265446	0.000200311	0.0089832	1793	2426	transmembrane protein 132C
SERF2	ENSG00000140264,ENSG00000140264,ENSG00000140264	-0.105812	0.000200325	0.0089832	10996	10438	small EDRK-rich factor 2
TRIM16L	ENSG00000108448	-0.40868	0.00020495	0.00916491	687	498	tripartite motif containing 16-like
IER3IP1	ENSG00000134049	0.075837	0.000206304	0.00919978	1127	1262	immediate early response 3 interacting protein 1
MATR3	ENSG00000015479,ENSG00000015479,ENSG00000015479,ENSG00000015479,ENSG00000015479	0.0920378	0.000207532	0.0092164	4834	5395	matrin 3
SLC7A4	ENSG00000099960	-0.462733	0.000207828	0.0092164	446	303	solute carrier family 7 (orphan transporter), member 4
LSM14B	ENSG00000149657	0.0802241	0.000208705	0.00922972	754	859	LSM14B, SCD6 homolog B (S. cerevisiae)
CHST8	ENSG00000124302,ENSG00000124302,ENSG00000124302	-0.467863	0.000210017	0.00924099	27	18	carbohydrate (N-acetylgalactosamine 4-0) sulfotransferase 8
LOC100134259	ENSG00000239332	0.313817	0.000210114	0.00924099	22	31	NA
RPS3A	ENSG00000145425	0.124911	0.00021251	0.00932075	18358	22035	ribosomal protein S3A
SRSF2	ENSG00000161547,ENSG00000161547,ENSG00000161547	0.119053	0.000213264	0.00932827	5443	6502	serine/arginine-rich splicing factor 2
SNPH	ENSG00000101298	-0.227271	0.000214045	0.00933692	198	170	syntaphilin
VIM	ENSG00000026025	0.140719	0.000218775	0.00947121	122307	145445	vimentin
HIST2H2AA3	ENSG00000183558	-0.278419	0.000218899	0.00947121	198	158	histone cluster 2, H2aa3
HIST2H2AA4	ENSG00000203812	-0.278419	0.000218899	0.00947121	198	158	histone cluster 2, H2aa4
DRAM2	ENSG00000156171	0.13291	0.000219703	0.0094804	1836	2134	DNA-damage regulated autophagy modulator 2
PTGDS	ENSG00000107317	-0.607277	0.00022036	0.00948318	1719	954	prostaglandin D2 synthase 21kDa (brain)
PREB	ENSG00000138073	-0.143501	0.000221246	0.00949578	2418	2240	prolactin regulatory element binding
SLC27A2	ENSG00000140284,ENSG00000140284	0.619559	0.000223857	0.00958134	12	24	solute carrier family 27 (fatty acid transporter), member 2
ECHDC1	ENSG00000093144,ENSG00000093144,ENSG00000093144,ENSG00000093144,ENSG00000093144	-0.31522	0.000224459	0.00958134	4687	3556	enoyl CoA hydratase domain containing 1
FAT1	ENSG00000083857	-0.238706	0.000225258	0.00958134	5287	4189	FAT atypical cadherin 1
LY6H	ENSG00000176956,ENSG00000176956,ENSG00000176956	-0.725885	0.000225633	0.00958134	22	12	lymphocyte antigen 6 complex, locus H
ARNT2	ENSG00000172379	-0.26204	0.000226803	0.00959793	54	42	aryl-hydrocarbon receptor nuclear translocator 2
RPS24	ENSG00000138326,ENSG00000138326,ENSG00000138326,ENSG00000138326,ENSG00000138326,ENSG00000138326	0.13428	0.000227223	0.00959793	15620	18869	ribosomal protein S24
RERE	ENSG00000142599,ENSG00000142599,ENSG00000142599	0.118334	0.00022959	0.00967237	4222	5031	arginine-glutamic acid dipeptide (RE) repeats
CCL26	ENSG00000262029,ENSG00000006606	-0.529063	0.000230257	0.00967502	24	15	chemokine (C-C motif) ligand 26
SLIT2	ENSG00000145147	-0.242407	0.000232021	0.00972362	514	410	slit homolog 2 (Drosophila)
TMEM132A	ENSG00000006118,ENSG00000006118	-0.282408	0.000232856	0.00973314	319	261	transmembrane protein 132A
CYP46A1	ENSG00000036530	-0.305086	0.000234643	0.00978231	153	123	cytochrome P450, family 46, subfamily A, polypeptide 1
HMGB1	ENSG00000189403	0.0803077	0.000235591	0.00979632	12033	13602	high mobility group box 1
LOC100506368	ENSG00000246523	-0.273346	0.000236637	0.00981429	56	45	NA
PDIA2	ENSG00000185615	-0.467669	0.000238375	0.00984385	89	70	protein disulfide isomerase family A, member 2
TRHDE	ENSG00000072657	-0.270988	0.000238579	0.00984385	422	325	thyrotropin-releasing hormone degrading enzyme
TRPM3	ENSG00000083067,ENSG00000083067,ENSG00000083067,ENSG00000083067,ENSG00000083067,ENSG00000083067,ENSG00000083067	-0.734986	0.000241184	0.00992575	24	11	transient receptor potential cation channel, subfamily M, member 3
METTL18	ENSG00000171806	0.146654	0.000242644	0.00996021	113	135	methyltransferase like 18
CIDEA	ENSG00000176194,ENSG00000176194	0.473924	0.000243699	0.00996346	1747	3037	cell death-inducing DFFA-like effector a
CLEC2B	ENSG00000110852	0.113348	0.000243968	0.00996346	559	650	C-type lectin domain family 2, member B
ARMS2	ENSG00000254636	-0.788924	0.000246436	0.0100387	10	6	age-related maculopathy susceptibility 2
HIC2	ENSG00000169635	0.176708	0.000247413	0.0100451	197	251	hypermethylated in cancer 2
PARP6	ENSG00000137817	0.0817401	0.000249182	0.0100451	997	1141	poly (ADP-ribose) polymerase family, member 6
EIF2S3	ENSG00000130741	0.0760245	0.000249248	0.0100451	4435	4970	eukaryotic translation initiation factor 2, subunit 3 gamma, 52kDa
DPYSL2	ENSG00000092964,ENSG00000092964,ENSG00000092964	0.111514	0.000249327	0.0100451	4415	5219	dihydropyrimidinase-like 2
ERGIC1	ENSG00000113719	0.0934246	0.00024973	0.0100451	3438	3978	endoplasmic reticulum-golgi intermediate compartment (ERGIC) 1
SNX11	ENSG00000002919,ENSG00000002919	-0.0696135	0.000250612	0.0100552	606	596	sorting nexin 11
C2orf16	ENSG00000221843	-0.236037	0.000251501	0.0100657	35	28	chromosome 2 open reading frame 16
TADA1	ENSG00000152382	0.102163	0.000254229	0.0101495	200	231	transcriptional adaptor 1
HSPB8	ENSG00000152137	-0.258187	0.000255636	0.0101803	1808	1451	heat shock 22kDa protein 8
RAB9A	ENSG00000123595,ENSG00000123595	-0.201527	0.00025629	0.010181	1149	986	RAB9A, member RAS oncogene family
LPIN2	ENSG00000101577	0.103654	0.000260405	0.0103189	704	803	lipin 2
DDX47	ENSG00000213782,ENSG00000213782	0.0817404	0.000263388	0.0103698	751	853	DEAD (Asp-Glu-Ala-Asp) box polypeptide 47
EPB41L4A-AS1	ENSG00000224032	0.191238	0.000263941	0.0103698	484	608	EPB41L4A antisense RNA 1
TTC30A	ENSG00000197557	-0.193772	0.000264314	0.0103698	234	199	tetratricopeptide repeat domain 30A
LRIF1	ENSG00000121931,ENSG00000121931	-0.151337	0.000265194	0.0103698	348	314	ligand dependent nuclear receptor interacting factor 1
ANK3	ENSG00000151150,ENSG00000151150,ENSG00000151150,ENSG00000151150	-0.400408	0.000265299	0.0103698	281	198	ankyrin 3, node of Ranvier (ankyrin G)
CABLES1	ENSG00000134508,ENSG00000134508,ENSG00000134508	0.138363	0.000265577	0.0103698	1216	1480	Cdk5 and Abl enzyme substrate 1
MAP3K4	ENSG00000085511,ENSG00000085511	0.0865736	0.000268142	0.0104445	601	690	mitogen-activated protein kinase kinase kinase 4
NHSL2	ENSG00000204131	-0.316691	0.000269408	0.0104683	79	55	NHS-like 2
EGFL6	ENSG00000198759,ENSG00000198759	-0.461334	0.000270394	0.0104812	10412	7334	EGF-like-domain, multiple 6
SUSD5	ENSG00000173705	-0.394194	0.000274121	0.0106	45	32	sushi domain containing 5
SEL1L2	ENSG00000101251	-0.55544	0.000276001	0.0106427	110	79	sel-1 suppressor of lin-12-like 2 (C. elegans)
RETSAT	ENSG00000042445	-0.17402	0.000276556	0.0106427	20614	18441	retinol saturase (all-trans-retinol 13,14-reductase)
USPL1	ENSG00000132952	0.117963	0.000283667	0.0108435	688	817	ubiquitin specific peptidase like 1
MAP3K5	ENSG00000197442	0.201906	0.000284013	0.0108435	548	685	mitogen-activated protein kinase kinase kinase 5
FDPS	ENSG00000160752,ENSG00000160752,ENSG00000160752,ENSG00000160752	-0.145423	0.000284083	0.0108435	1999	1919	farnesyl diphosphate synthase
ENPP3	ENSG00000154269	-0.311335	0.000285114	0.0108435	74	59	ectonucleotide pyrophosphatase/phosphodiesterase 3
RNF19A	ENSG00000034677,ENSG00000034677	-0.137975	0.000285158	0.0108435	2050	1833	ring finger protein 19A, E3 ubiquitin protein ligase
FLJ43390	ENSG00000186369	-0.739278	0.000286064	0.0108521	28	15	NA
AK8	ENSG00000165695	-0.234761	0.000286759	0.0108528	28	23	adenylate kinase 8
MOCS1	ENSG00000124615,ENSG00000124615	0.170164	0.000288221	0.0108638	1558	1918	molybdenum cofactor synthesis 1
LDLRAD3	ENSG00000179241	0.197134	0.000288409	0.0108638	327	406	low density lipoprotein receptor class A domain containing 3
HMGB2	ENSG00000164104	0.136967	0.000289728	0.0108879	1346	1635	high mobility group box 2
STK17A	ENSG00000164543	-0.233077	0.000291146	0.0109156	651	541	serine/threonine kinase 17a
TSPAN15	ENSG00000099282	0.168575	0.00029611	0.0110566	4296	5444	tetraspanin 15
EMP2	ENSG00000213853	0.112456	0.000296289	0.0110566	2291	2706	epithelial membrane protein 2
RPL39	ENSG00000198918	0.136652	0.000297401	0.0110688	13132	15956	ribosomal protein L39
GMEB2	ENSG00000101216	0.080868	0.000297999	0.0110688	472	550	glucocorticoid modulatory element binding protein 2
MXI1	ENSG00000119950,ENSG00000119950,ENSG00000119950	0.170328	0.000299879	0.0111129	1067	1281	MAX interactor 1, dimerization protein
CDC42EP4	ENSG00000179604	0.166464	0.000306421	0.0113291	2761	3421	CDC42 effector protein (Rho GTPase binding) 4
CCDC51	ENSG00000164051	-0.114647	0.000314075	0.0115853	285	270	coiled-coil domain containing 51
RNF130	ENSG00000113269	0.144843	0.000315016	0.0115933	5406	6323	ring finger protein 130
IFT81	ENSG00000122970,ENSG00000122970,ENSG00000122970	-0.153266	0.000316835	0.0116335	261	232	intraflagellar transport 81 homolog (Chlamydomonas)
UCHL1	ENSG00000154277	-0.248631	0.000319062	0.0116885	3855	3208	ubiquitin carboxyl-terminal esterase L1 (ubiquitin thiolesterase)
RABGGTB	ENSG00000137955	0.104817	0.000321813	0.0117623	959	1110	Rab geranylgeranyltransferase, beta subunit
ABCA6	ENSG00000154262	-0.207637	0.000324329	0.0118112	1478	1210	ATP-binding cassette, sub-family A (ABC1), member 6
LSM1	ENSG00000175324,ENSG00000175324	-0.108475	0.000324624	0.0118112	741	697	LSM1 homolog, U6 small nuclear RNA associated (S. cerevisiae)
CDR2L	ENSG00000109089	-0.217114	0.000326087	0.0118308	876	751	cerebellar degeneration-related protein 2-like
KIAA0146	ENSG00000164808	0.0862881	0.000326642	0.0118308	762	864	KIAA0146
OTUD5	ENSG00000267983,ENSG00000068308,ENSG00000267983,ENSG00000068308,ENSG00000068308,ENSG00000068308	0.0917014	0.000328683	0.0118377	1659	1949	OTU domain containing 5
ProSAPiP1	ENSG00000088899	0.0981239	0.000328812	0.0118377	263	309	NA
CPT1B	ENSG00000205560,ENSG00000205560,ENSG00000205560,ENSG00000205560,ENSG00000205560,ENSG00000205560,ENSG00000205560	0.29448	0.000329052	0.0118377	557	810	carnitine palmitoyltransferase 1B (muscle)
PRRG2	ENSG00000126460	-0.289144	0.000332273	0.0119268	23	19	proline rich Gla (G-carboxyglutamic acid) 2
RPIA	ENSG00000153574	0.0973924	0.000333436	0.0119306	617	724	ribose 5-phosphate isomerase A
SLC39A7	ENSG00000112473,ENSG00000226614,ENSG00000224399,ENSG00000206288,ENSG00000227402,ENSG00000229802	-0.104112	0.000333869	0.0119306	2679	2582	solute carrier family 39 (zinc transporter), member 7
HNRNPA2B1	ENSG00000122566,ENSG00000122566	0.0818331	0.000337152	0.0120211	12095	13868	heterogeneous nuclear ribonucleoprotein A2/B1
RTKN2	ENSG00000182010	-0.395109	0.000339212	0.0120551	29	21	rhotekin 2
SCIN	ENSG00000006747,ENSG00000006747	-0.339498	0.000339819	0.0120551	701	541	scinderin
HIRIP3	ENSG00000149929	0.103521	0.000340672	0.0120551	434	511	HIRA interacting protein 3
ADH1B	ENSG00000196616	0.317807	0.000341119	0.0120551	37145	52102	alcohol dehydrogenase 1B (class I), beta polypeptide
TARSL2	ENSG00000185418	0.130431	0.000342089	0.0120628	332	398	threonyl-tRNA synthetase-like 2
PCK2	ENSG00000100889,ENSG00000100889	0.284164	0.000345099	0.0121422	706	959	phosphoenolpyruvate carboxykinase 2 (mitochondrial)
NECAB2	ENSG00000103154	-0.604946	0.000346837	0.0121766	18	10	N-terminal EF-hand calcium binding protein 2
CD302	ENSG00000241399,ENSG00000241399,ENSG00000241399	0.127463	0.000350816	0.0122892	3093	3502	CD302 molecule
OXA1L	ENSG00000155463	0.0833944	0.000352535	0.0122892	2676	3040	oxidase (cytochrome c) assembly 1-like
EIF4H	ENSG00000106682,ENSG00000106682	0.0754816	0.000353042	0.0122892	7485	8457	eukaryotic translation initiation factor 4H
DCD	ENSG00000161634	3.12769	0.000353552	0.0122892	0	10	dermcidin
SRL	ENSG00000185739	-0.341337	0.000354631	0.0122892	74	57	sarcalumenin
TIMM23	ENSG00000138297	-0.11308	0.000354651	0.0122892	1238	1168	translocase of inner mitochondrial membrane 23 homolog (yeast)
HP	ENSG00000257017,ENSG00000257017	-0.958521	0.000357633	0.0123658	767	268	haptoglobin
RPL6	ENSG00000089009,ENSG00000089009	0.0878453	0.000358476	0.0123682	14509	16752	ribosomal protein L6
TCF3	ENSG00000071564	0.0707345	0.000360912	0.0124255	1139	1294	transcription factor 3
TMEM88	ENSG00000167874	-0.263391	0.000362345	0.012448	306	260	transmembrane protein 88
C1orf168	ENSG00000187889	-1.10914	0.00036461	0.012499	12	6	chromosome 1 open reading frame 168
ZDHHC18	ENSG00000204160	0.168925	0.000367182	0.0125603	1015	1288	zinc finger, DHHC-type containing 18
DRAM1	ENSG00000136048	0.14857	0.000368928	0.0125726	543	639	DNA-damage regulated autophagy modulator 1
PDZD3	ENSG00000172367,ENSG00000172367	-0.572096	0.000369112	0.0125726	36	21	PDZ domain containing 3
DCLRE1A	ENSG00000198924	-0.171773	0.000370749	0.0126015	175	149	DNA cross-link repair 1A
DYNC1H1	ENSG00000197102	-0.105173	0.000374807	0.0127125	9170	8652	dynein, cytoplasmic 1, heavy chain 1
ZMYM6NB	ENSG00000243749	0.0936558	0.000376673	0.0127488	842	959	ZMYM6 neighbor
PTCD2	ENSG00000049883	-0.151626	0.000378049	0.0127683	154	137	pentatricopeptide repeat domain 2
THRSP	ENSG00000151365	-0.262386	0.00037953	0.0127914	9885	7957	thyroid hormone responsive
KIAA0408	ENSG00000189367	-0.31497	0.000381067	0.0128162	1003	739	KIAA0408
TRIOBP	ENSG00000100106,ENSG00000100106,ENSG00000100106	0.0860858	0.000382994	0.012854	2968	3432	TRIO and F-actin binding protein
EDN1	ENSG00000078401,ENSG00000078401	0.463109	0.000384754	0.012886	405	665	endothelin 1
PABPC4	ENSG00000090621,ENSG00000090621,ENSG00000090621	0.161128	0.000385882	0.0128968	3449	4171	poly(A) binding protein, cytoplasmic 4 (inducible form)
TUFT1	ENSG00000143367,ENSG00000143367	-0.266702	0.000389018	0.0129746	415	337	tuftelin 1
DAZAP1	ENSG00000071626,ENSG00000071626	0.0965127	0.000393555	0.0130986	2209	2606	DAZ associated protein 1
PACS2	ENSG00000179364,ENSG00000179364,ENSG00000179364	0.100484	0.000403302	0.0133952	2878	3422	phosphofurin acidic cluster sorting protein 2
MMP24	ENSG00000125966	-0.187104	0.000405564	0.0134424	752	667	matrix metallopeptidase 24 (membrane-inserted)
LOC646329	ENSG00000226380,ENSG00000265410	-0.293707	0.000407826	0.0134885	37	30	NA
ZNFX1-AS1	ENSG00000177410,ENSG00000177410,ENSG00000177410,ENSG00000177410,ENSG00000177410	0.157958	0.000409231	0.0134885	1484	1810	NA
RPS27A	ENSG00000143947,ENSG00000143947	0.103312	0.000409484	0.0134885	12394	14500	ribosomal protein S27a
PHLDA3	ENSG00000174307	0.17997	0.000411537	0.0135016	5249	6746	pleckstrin homology-like domain, family A, member 3
RASSF9	ENSG00000198774	-0.333151	0.000411568	0.0135016	71	50	Ras association (RalGDS/AF-6) domain family (N-terminal) member 9
ME1	ENSG00000065833	-0.327519	0.000413147	0.0135257	3190	2375	malic enzyme 1, NADP(+)-dependent, cytosolic
MME	ENSG00000196549,ENSG00000196549,ENSG00000196549,ENSG00000196549	-0.257121	0.000417784	0.0136496	8216	6455	membrane metallo-endopeptidase
DHRS7	ENSG00000100612	0.102605	0.000421552	0.0137447	1278	1443	dehydrogenase/reductase (SDR family) member 7
KCNB1	ENSG00000158445	-0.307744	0.000425404	0.013842	265	188	potassium voltage-gated channel, Shab-related subfamily, member 1
TMEM220	ENSG00000187824	0.123275	0.000427472	0.0138811	494	581	transmembrane protein 220
EEFSEC	ENSG00000132394	0.114625	0.000430145	0.0139396	428	508	eukaryotic elongation factor, selenocysteine-tRNA-specific
RPL29	ENSG00000162244	0.115392	0.000433683	0.0139995	12127	14471	ribosomal protein L29
GTF2H5	ENSG00000185068	-0.121106	0.000433742	0.0139995	1247	1166	general transcription factor IIH, polypeptide 5
ARRDC2	ENSG00000105643,ENSG00000105643	0.185186	0.000435813	0.0140381	1552	1990	arrestin domain containing 2
PDGFD	ENSG00000170962,ENSG00000170962	-0.343454	0.000441911	0.0142059	1324	945	platelet derived growth factor D
KCTD10	ENSG00000110906	-0.112148	0.000443538	0.0142297	3337	3145	potassium channel tetramerization domain containing 10
EHHADH	ENSG00000113790,ENSG00000113790	-0.245076	0.000447406	0.0143179	926	761	enoyl-CoA, hydratase/3-hydroxyacyl CoA dehydrogenase
COL3A1	ENSG00000168542	-0.325845	0.000448076	0.0143179	72965	55092	collagen, type III, alpha 1
VPS16	ENSG00000215305,ENSG00000215305	0.109852	0.000451264	0.014391	882	1045	vacuolar protein sorting 16 homolog (S. cerevisiae)
NPY5R	ENSG00000164129	-0.261217	0.000452273	0.0143945	609	497	neuropeptide Y receptor Y5
KIAA0754	ENSG00000255103	-0.4981	0.000453279	0.0143979	337	195	KIAA0754
MRPL49	ENSG00000149792,ENSG00000149792	0.12474	0.000457113	0.0144909	716	847	mitochondrial ribosomal protein L49
AKIRIN2	ENSG00000135334	-0.142236	0.000458608	0.0145096	1999	1789	akirin 2
ZNF687	ENSG00000143373	0.085949	0.000460245	0.0145279	527	597	zinc finger protein 687
SKP2	ENSG00000145604,ENSG00000145604	-0.171787	0.000461002	0.0145279	714	630	S-phase kinase-associated protein 2, E3 ubiquitin protein ligase
PLA2G4A	ENSG00000116711	-0.365444	0.000465078	0.0146276	895	645	phospholipase A2, group IVA (cytosolic, calcium-dependent)
RPL12	ENSG00000197958	0.139924	0.00046808	0.0146931	12583	15315	ribosomal protein L12
UBAC2	ENSG00000134882,ENSG00000134882,ENSG00000134882	-0.0706574	0.000470255	0.0147325	1352	1318	UBA domain containing 2
SERPING1	ENSG00000149131,ENSG00000149131	0.124658	0.000479425	0.0149904	13628	15947	serpin peptidase inhibitor, clade G (C1 inhibitor), member 1
C4orf19	ENSG00000154274,ENSG00000154274	-0.249612	0.000486876	0.015193	424	360	chromosome 4 open reading frame 19
TBCK	ENSG00000145348,ENSG00000145348,ENSG00000145348,ENSG00000145348,ENSG00000145348,ENSG00000145348	-0.147498	0.000487801	0.015193	738	656	TBC1 domain containing kinase
TIMM13	ENSG00000099800	-0.0998656	0.000489739	0.0152238	1111	1070	translocase of inner mitochondrial membrane 13 homolog (yeast)
CTBP2	ENSG00000175029,ENSG00000175029,ENSG00000175029	0.096701	0.000491901	0.0152613	1213	1376	C-terminal binding protein 2
SLC36A2	ENSG00000186335	-0.523282	0.000493049	0.0152641	42	26	solute carrier family 36 (proton/amino acid symporter), member 2
LOC100499489	NA	0.129087	0.000493898	0.0152641	135	158	NA
NNT	ENSG00000112992,ENSG00000112992	-0.156674	0.000496825	0.015325	2361	2084	nicotinamide nucleotide transhydrogenase
RPL24	ENSG00000114391	0.122645	0.000500589	0.0154114	9093	10889	ribosomal protein L24
GPR160	ENSG00000173890	0.159152	0.000503148	0.0154499	357	439	G protein-coupled receptor 160
TRPC6	ENSG00000137672	-0.173891	0.000503769	0.0154499	353	320	transient receptor potential cation channel, subfamily C, member 6
PANX2	ENSG00000073150,ENSG00000073150	-0.351743	0.000505071	0.0154602	83	65	pannexin 2
FAM190A	ENSG00000184305,ENSG00000184305	0.339016	0.000508698	0.0155415	32	44	NA
UPF3A	ENSG00000169062,ENSG00000169062	0.0816709	0.000509961	0.0155504	1776	2071	UPF3 regulator of nonsense transcripts homolog A (yeast)
TTYH1	ENSG00000167614,ENSG00000167614,ENSG00000167614	-0.717913	0.000511781	0.0155762	180	117	tweety homolog 1 (Drosophila)
FLJ39051	NA	-0.267519	0.000512809	0.0155779	47	39	NA
VPS54	ENSG00000143952,ENSG00000143952	0.0861925	0.000522893	0.0158542	730	808	vacuolar protein sorting 54 homolog (S. cerevisiae)
MMAA	ENSG00000151611	-0.094707	0.000526908	0.0158987	247	231	methylmalonic aciduria (cobalamin deficiency) cblA type
C1orf226	ENSG00000239887,ENSG00000239887	-0.235026	0.000527874	0.0158987	263	224	chromosome 1 open reading frame 226
SMG7	ENSG00000116698,ENSG00000116698,ENSG00000116698,ENSG00000116698	0.0750552	0.000528351	0.0158987	1461	1663	smg-7 homolog, nonsense mediated mRNA decay factor (C. elegans)
C9orf116	ENSG00000160345,ENSG00000160345,ENSG00000160345	-0.295578	0.00052885	0.0158987	62	48	chromosome 9 open reading frame 116
MBNL3	ENSG00000076770,ENSG00000076770,ENSG00000076770,ENSG00000076770,ENSG00000076770,ENSG00000076770	-0.243181	0.000529329	0.0158987	874	690	muscleblind-like splicing regulator 3
PET112	ENSG00000059691	-0.130912	0.000531277	0.0159274	553	514	PET112 homolog (yeast)
CCDC149	ENSG00000181982,ENSG00000181982	0.0905232	0.000537845	0.0160941	339	392	coiled-coil domain containing 149
C21orf67	ENSG00000183250	-0.208819	0.000540161	0.0161333	52	45	chromosome 21 open reading frame 67
ERRFI1	ENSG00000116285	0.337807	0.000544816	0.016242	1724	2466	ERBB receptor feedback inhibitor 1
PSMD10	ENSG00000101843,ENSG00000101843	0.0742516	0.000550855	0.0163915	805	894	proteasome (prosome, macropain) 26S subunit, non-ATPase, 10
ZNF274	ENSG00000171606,ENSG00000171606,ENSG00000171606	0.0989293	0.00056022	0.0166147	480	565	zinc finger protein 274
LOC728431	ENSG00000233621	-0.145834	0.000560431	0.0166147	110	100	NA
CCDC115	ENSG00000136710	0.101385	0.000563247	0.0166661	1027	1194	coiled-coil domain containing 115
TBC1D14	ENSG00000132405,ENSG00000132405,ENSG00000132405	0.0971708	0.000564245	0.0166661	1497	1709	TBC1 domain family, member 14
AMOT	ENSG00000126016,ENSG00000126016	-0.372321	0.000570638	0.0167741	1047	766	angiomotin
APIP	ENSG00000149089	0.10166	0.000570954	0.0167741	856	994	APAF1 interacting protein
RAB20	ENSG00000139832	0.262731	0.000572233	0.0167741	516	692	RAB20, member RAS oncogene family
APBA1	ENSG00000107282	0.145292	0.000572864	0.0167741	224	269	amyloid beta (A4) precursor protein-binding, family A, member 1
GPR75	ENSG00000119737	-0.312341	0.000573144	0.0167741	23	18	G protein-coupled receptor 75
RPL7A	ENSG00000148303	0.0932161	0.00057615	0.0168314	16277	18689	ribosomal protein L7a
CAST	ENSG00000153113,ENSG00000153113,ENSG00000153113	0.101876	0.000579107	0.0168688	6453	7331	calpastatin
OSGIN2	ENSG00000164823,ENSG00000164823	-0.267134	0.000579677	0.0168688	2793	2217	oxidative stress induced growth inhibitor family member 2
LOC100507632	ENSG00000246430	-0.533678	0.000581464	0.0168688	980	625	NA
PIGM	ENSG00000143315	-0.126544	0.000582719	0.0168688	359	323	phosphatidylinositol glycan anchor biosynthesis, class M
FSTL1	ENSG00000163430	-0.143988	0.000583064	0.0168688	25790	23210	follistatin-like 1
IFT20	ENSG00000109083	-0.07648	0.000583755	0.0168688	485	475	intraflagellar transport 20 homolog (Chlamydomonas)
TRDN	ENSG00000186439,ENSG00000186439,ENSG00000186439	-0.582633	0.000584829	0.0168694	1181	738	triadin
UBTF	ENSG00000108312,ENSG00000108312,ENSG00000108312	0.0644878	0.000591306	0.0170256	2212	2493	upstream binding transcription factor, RNA polymerase I
C10orf114	ENSG00000204682	-0.279189	0.000593784	0.0170406	95	77	chromosome 10 open reading frame 114
LATS1	ENSG00000131023	-0.291756	0.000593958	0.0170406	240	169	large tumor suppressor kinase 1
ACACA	ENSG00000132142,ENSG00000132142,ENSG00000132142,ENSG00000132142,ENSG00000132142	-0.336285	0.00060218	0.0172153	2331	1723	acetyl-CoA carboxylase alpha
PLD6	ENSG00000179598	0.258582	0.000602197	0.0172153	268	370	phospholipase D family, member 6
CCL22	ENSG00000102962	-0.543274	0.000606698	0.0173131	242	147	chemokine (C-C motif) ligand 22
AP2M1	ENSG00000161203,ENSG00000161203	-0.0991088	0.000609307	0.0173566	7147	6908	adaptor-related protein complex 2, mu 1 subunit
KRT16	ENSG00000186832	-0.857807	0.000622721	0.0176755	361	162	keratin 16
AQP1	ENSG00000240583,ENSG00000240583,ENSG00000240583,ENSG00000240583	-0.263267	0.000622837	0.0176755	18044	15236	aquaporin 1 (Colton blood group)
RPL13	ENSG00000167526,ENSG00000167526	0.142503	0.000624691	0.0176755	17927	21976	ribosomal protein L13
RPL37A	ENSG00000197756	0.129111	0.00062582	0.0176755	18063	21704	ribosomal protein L37a
ZNF639	ENSG00000121864	0.0894738	0.000626022	0.0176755	524	589	zinc finger protein 639
SUMO3	ENSG00000184900	0.0826298	0.00062913	0.0177097	2527	2853	small ubiquitin-like modifier 3
KLF6	ENSG00000067082,ENSG00000067082,ENSG00000067082	0.189862	0.000629446	0.0177097	5296	6596	Kruppel-like factor 6
VPS45	ENSG00000136631	-0.0613869	0.000631261	0.0177296	1178	1168	vacuolar protein sorting 45 homolog (S. cerevisiae)
ACOT6	ENSG00000205669	0.32126	0.000633598	0.0177335	19	27	acyl-CoA thioesterase 6
VGLL3	ENSG00000206538	-0.28587	0.000633616	0.0177335	2897	2180	vestigial like 3 (Drosophila)
VAV2	ENSG00000160293,ENSG00000160293	0.131148	0.000639617	0.0178702	469	578	vav 2 guanine nucleotide exchange factor
MMP15	ENSG00000102996	-0.213774	0.000640812	0.0178724	1765	1529	matrix metallopeptidase 15 (membrane-inserted)
C16orf58	ENSG00000140688	0.0699888	0.000643214	0.0178735	1784	2053	chromosome 16 open reading frame 58
RRAGD	ENSG00000025039	0.154908	0.000643758	0.0178735	847	999	Ras-related GTP binding D
SELENBP1	ENSG00000143416	-0.175765	0.000644201	0.0178735	7471	6724	selenium binding protein 1
MRC2	ENSG00000011028	-0.278665	0.000647507	0.0179202	3423	2794	mannose receptor, C type 2
COX14	ENSG00000178449	0.188313	0.000648122	0.0179202	1388	1813	cytochrome c oxidase assembly homolog 14 (S. cerevisiae)
NLE1	ENSG00000073536,ENSG00000073536	-0.109222	0.000650872	0.0179652	391	370	notchless homolog 1 (Drosophila)
DPRX	ENSG00000204595	-0.70143	0.000654339	0.0180298	19	12	divergent-paired related homeobox
CEBPD	ENSG00000221869	0.228082	0.000657499	0.0180857	2426	3164	CCAAT/enhancer binding protein (C/EBP), delta
GADD45A	ENSG00000116717,ENSG00000116717	0.184162	0.000660035	0.0181244	945	1153	growth arrest and DNA-damage-inducible, alpha
PPFIA3	ENSG00000177380	-0.195308	0.000664941	0.018142	136	128	protein tyrosine phosphatase, receptor type, f polypeptide (PTPRF), interacting protein (liprin), alpha 3
IDS	ENSG00000010404,ENSG00000010404,ENSG00000010404	0.0834903	0.000665786	0.018142	4198	4658	iduronate 2-sulfatase
ERI2	ENSG00000196678,ENSG00000196678	-0.147853	0.000667358	0.018142	397	355	ERI1 exoribonuclease family member 2
CCL17	ENSG00000102970	-0.779341	0.000667427	0.018142	12	6	chemokine (C-C motif) ligand 17
RPS14	ENSG00000164587,ENSG00000164587,ENSG00000164587	0.109067	0.00066768	0.018142	13356	15785	ribosomal protein S14
ST13	ENSG00000100380	0.138739	0.000668569	0.018142	7784	9235	suppression of tumorigenicity 13 (colon carcinoma) (Hsp70 interacting protein)
ANAPC16	ENSG00000166295,ENSG00000166295,ENSG00000166295	0.0758707	0.000668612	0.018142	3115	3518	anaphase promoting complex subunit 16
MAP3K8	ENSG00000107968,ENSG00000107968	0.16007	0.000671989	0.018163	494	606	mitogen-activated protein kinase kinase kinase 8
KIFC3	ENSG00000269180,ENSG00000140859,ENSG00000140859,ENSG00000140859	0.128753	0.000672449	0.018163	1544	1909	kinesin family member C3
MAP1B	ENSG00000131711	-0.185116	0.000672789	0.018163	3151	2750	microtubule-associated protein 1B
NEDD4L	ENSG00000049759,ENSG00000049759,ENSG00000049759,ENSG00000049759,ENSG00000049759,ENSG00000049759,ENSG00000049759,ENSG00000049759,ENSG00000049759	0.175183	0.00067516	0.0181964	849	1049	neural precursor cell expressed, developmentally down-regulated 4-like, E3 ubiquitin protein ligase
AVPR1A	ENSG00000166148	-0.278965	0.000679138	0.0182728	255	181	arginine vasopressin receptor 1A
LSM6	ENSG00000164167	0.0992232	0.000681758	0.0183102	494	567	LSM6 homolog, U6 small nuclear RNA associated (S. cerevisiae)
KAT8	ENSG00000103510,ENSG00000103510	0.0778918	0.000682815	0.0183102	730	841	K(lysine) acetyltransferase 8
HNRNPK	ENSG00000165119,ENSG00000165119,ENSG00000165119	0.0632165	0.000688818	0.0184403	11276	12409	heterogeneous nuclear ribonucleoprotein K
FABP4	ENSG00000170323	0.228933	0.000693015	0.0185217	106035	139883	fatty acid binding protein 4, adipocyte
S100B	ENSG00000160307	-0.225084	0.00069549	0.0185568	4614	4045	S100 calcium binding protein B
ZNF384	ENSG00000126746,ENSG00000126746,ENSG00000126746	0.0871982	0.000701131	0.0186636	1084	1254	zinc finger protein 384
HLF	ENSG00000108924	0.210361	0.000703406	0.0186636	719	900	hepatic leukemia factor
DUSP12	ENSG00000081721	0.0912408	0.000704129	0.0186636	305	352	dual specificity phosphatase 12
KRT2	ENSG00000172867	-2.1968	0.000704846	0.0186636	18	1	keratin 2
HBD	ENSG00000223609	-1.52286	0.00070532	0.0186636	23	9	hemoglobin, delta
H19	ENSG00000130600	-0.372357	0.000706875	0.0186739	23196	17823	H19, imprinted maternally expressed transcript (non-protein coding)
NFKBIA	ENSG00000100906	0.168701	0.000710837	0.0187004	2396	2896	nuclear factor of kappa light polypeptide gene enhancer in B-cells inhibitor, alpha
BRPF3	ENSG00000096070	0.117869	0.000713124	0.0187004	555	649	bromodomain and PHD finger containing, 3
DDX27	ENSG00000124228	0.0767656	0.000713457	0.0187004	702	802	DEAD (Asp-Glu-Ala-Asp) box polypeptide 27
CALML6	ENSG00000169885	-0.40888	0.000713638	0.0187004	24	19	calmodulin-like 6
KLB	ENSG00000134962	-0.271198	0.000714582	0.0187004	3482	2703	klotho beta
UBC	ENSG00000150991	-0.115269	0.000715797	0.0187004	49396	46623	ubiquitin C
SSPO	ENSG00000197558	-0.301568	0.000716055	0.0187004	119	99	SCO-spondin homolog (Bos taurus)
KRT1	ENSG00000167768	-1.39979	0.000719779	0.018767	92	18	keratin 1
MAGEF1	ENSG00000177383	-0.122739	0.000723459	0.0188323	801	742	melanoma antigen family F, 1
TRPC4	ENSG00000133107,ENSG00000133107,ENSG00000133107,ENSG00000133107,ENSG00000133107,ENSG00000133107	-0.596726	0.000728765	0.0189396	29	17	transient receptor potential cation channel, subfamily C, member 4
SETD1A	ENSG00000099381	0.0961916	0.000739576	0.0191894	801	930	SET domain containing 1A
CNTFR	ENSG00000122756,ENSG00000122756,ENSG00000122756	0.179526	0.000741902	0.0192186	1611	2050	ciliary neurotrophic factor receptor
KANK4	ENSG00000132854	-0.300292	0.000743347	0.019225	1974	1522	KN motif and ankyrin repeat domains 4
TXNDC15	ENSG00000113621	0.0860215	0.000745199	0.0192418	1371	1559	thioredoxin domain containing 15
CCDC71L	ENSG00000253276	-0.128465	0.00074885	0.0192576	1400	1275	coiled-coil domain containing 71-like
UBR4	ENSG00000127481	-0.0907649	0.000749134	0.0192576	4246	4069	ubiquitin protein ligase E3 component n-recognin 4
GPD1L	ENSG00000152642	0.189081	0.000749422	0.0192576	1076	1350	glycerol-3-phosphate dehydrogenase 1-like
SOS1	ENSG00000115904	-0.1874	0.000751122	0.0192704	4018	3381	son of sevenless homolog 1 (Drosophila)
GNAZ	ENSG00000128266	0.183715	0.000754165	0.0192795	750	974	guanine nucleotide binding protein (G protein), alpha z polypeptide
RNF152	ENSG00000176641	-0.427738	0.00075422	0.0192795	40	26	ring finger protein 152
DIAPH3	ENSG00000139734,ENSG00000139734	-0.440488	0.00075558	0.0192795	31	21	diaphanous-related formin 3
AADACL3	ENSG00000188984,ENSG00000188984	-0.879903	0.000757963	0.0192795	45	22	arylacetamide deacetylase-like 3
FASN	ENSG00000169710	-0.412619	0.000758716	0.0192795	37764	26618	fatty acid synthase
KCNA2	ENSG00000177301,ENSG00000177301	-0.302821	0.000759566	0.0192795	44	31	potassium voltage-gated channel, shaker-related subfamily, member 2
DDX43	ENSG00000080007	-0.329425	0.000759908	0.0192795	42	34	DEAD (Asp-Glu-Ala-Asp) box polypeptide 43
SNAPC3	ENSG00000164975	-0.155181	0.000761613	0.0192922	616	535	small nuclear RNA activating complex, polypeptide 3, 50kDa
EIF3F	ENSG00000175390	0.101124	0.000763407	0.0193071	3561	4103	eukaryotic translation initiation factor 3, subunit F
CRELD1	ENSG00000163703,ENSG00000163703,ENSG00000163703	-0.113814	0.000765142	0.0193204	1526	1443	cysteine-rich with EGF-like domains 1
CLCN4	ENSG00000073464	-0.2195	0.000767022	0.0193374	266	219	chloride channel, voltage-sensitive 4
APOL4	ENSG00000100336,ENSG00000100336	0.139874	0.000770075	0.0193803	404	494	apolipoprotein L, 4
CPT2	ENSG00000157184	-0.0973674	0.000771144	0.0193803	673	643	carnitine palmitoyltransferase 2
TFB2M	ENSG00000162851	-0.145629	0.000778573	0.0195363	338	305	transcription factor B2, mitochondrial
SNHG15	ENSG00000232956	0.12991	0.000779933	0.0195398	155	192	small nucleolar RNA host gene 15 (non-protein coding)
KLF3	ENSG00000109787	0.0877776	0.000788204	0.0197162	1886	2082	Kruppel-like factor 3 (basic)
MRRF	ENSG00000148187,ENSG00000148187,ENSG00000148187,ENSG00000148187	0.105551	0.000798237	0.0199074	481	574	mitochondrial ribosome recycling factor
AP3S1	ENSG00000177879	0.0857613	0.000798334	0.0199074	2291	2597	adaptor-related protein complex 3, sigma 1 subunit
GALNT1	ENSG00000141429	-0.11857	0.000799847	0.0199141	2281	2090	UDP-N-acetyl-alpha-D-galactosamine:polypeptide N-acetylgalactosaminyltransferase 1 (GalNAc-T1)
PRPF8	ENSG00000174231	0.0827781	0.000803999	0.0199864	4766	5480	pre-mRNA processing factor 8
AGBL5	ENSG00000084693,ENSG00000084693	0.126038	0.000806225	0.0200106	507	604	ATP/GTP binding protein-like 5
TBC1D24	ENSG00000162065,ENSG00000162065	-0.165215	0.000812678	0.0200961	886	798	TBC1 domain family, member 24
EDEM3	ENSG00000116406	-0.128574	0.000814138	0.0200961	1492	1295	ER degradation enhancer, mannosidase alpha-like 3
FSTL3	ENSG00000070404	-0.172508	0.000814343	0.0200961	4733	4293	follistatin-like 3 (secreted glycoprotein)
NPR3	ENSG00000113389,ENSG00000113389,ENSG00000113389	-0.322736	0.000814688	0.0200961	5169	3884	natriuretic peptide receptor C/guanylate cyclase C (atrionatriuretic peptide receptor C)
CD93	ENSG00000125810	-0.140721	0.000824589	0.020309	6245	5795	CD93 molecule
GYS1	ENSG00000104812,ENSG00000104812	-0.177335	0.000826888	0.0203343	1955	1774	glycogen synthase 1 (muscle)
MTRNR2L2	ENSG00000255823	-0.176156	0.000829633	0.0203629	105069	96321	MT-RNR2-like 2
LOC100288846	NA	-0.241583	0.000830594	0.0203629	71	57	NA
YBX1	ENSG00000065978	0.0998874	0.00083259	0.0203806	15664	17902	Y box binding protein 1
LUC7L2	ENSG00000146963,ENSG00000146963,ENSG00000146963	0.105723	0.000835037	0.0204093	1974	2328	LUC7-like 2 (S. cerevisiae)
AGAP2	ENSG00000135439,ENSG00000135439	-0.416879	0.000841716	0.0205412	360	260	ArfGAP with GTPase domain, ankyrin repeat and PH domain 2
VPS25	ENSG00000131475	-0.0771754	0.000852407	0.0207389	811	796	vacuolar protein sorting 25 homolog (S. cerevisiae)
JMY	ENSG00000152409	-0.102752	0.000857496	0.0208028	669	611	junction mediating and regulatory protein, p53 cofactor
MEGF9	ENSG00000106780	-0.275869	0.000857632	0.0208028	2447	1842	multiple EGF-like-domains 9
HMGN2	ENSG00000198830	0.070991	0.000862375	0.0208862	6184	6976	high mobility group nucleosomal binding domain 2
PDE8A	ENSG00000073417,ENSG00000073417,ENSG00000073417	0.104234	0.000865444	0.0209153	1761	2050	phosphodiesterase 8A
MYCBP	ENSG00000214114,ENSG00000214114	-0.144816	0.00086619	0.0209153	542	490	c-myc binding protein
PPP1R21	ENSG00000162869,ENSG00000162869,ENSG00000162869	0.0778991	0.000872355	0.0210324	750	836	protein phosphatase 1, regulatory subunit 21
ZNF81	ENSG00000197779,ENSG00000269594	-0.267975	0.000874805	0.0210598	69	50	zinc finger protein 81
SDSL	ENSG00000139410	-0.251964	0.000877523	0.0210919	271	225	serine dehydratase-like
ZFAND1	ENSG00000104231,ENSG00000104231,ENSG00000104231	0.105185	0.000878776	0.0210919	620	715	zinc finger, AN1-type domain 1
E2F1	ENSG00000101412	-0.230078	0.000882781	0.0211563	180	155	E2F transcription factor 1
TMEM182	ENSG00000170417	-0.292014	0.000886892	0.0212231	219	169	transmembrane protein 182
MFI2	ENSG00000163975,ENSG00000163975	0.388368	0.000900171	0.0215046	238	369	antigen p97 (melanoma associated) identified by monoclonal antibodies 133.2 and 96.5
CYB561	ENSG00000008283,ENSG00000008283,ENSG00000008283	-0.131797	0.000901344	0.0215046	1246	1167	cytochrome b561
TRPM2	ENSG00000142185,ENSG00000142185,ENSG00000142185	-0.207279	0.000904355	0.0215444	325	281	transient receptor potential cation channel, subfamily M, member 2
DFNA5	ENSG00000105928,ENSG00000105928,ENSG00000105928	0.373267	0.000907343	0.0215834	215	307	deafness, autosomal dominant 5
RNF139	ENSG00000170881	0.093153	0.000909497	0.0215849	969	1094	ring finger protein 139
NMNAT1	ENSG00000173614	-0.132141	0.000910102	0.0215849	404	377	nicotinamide nucleotide adenylyltransferase 1
SAP30L	ENSG00000164576,ENSG00000164576,ENSG00000164576,ENSG00000164576	0.0991794	0.000916814	0.0217119	1376	1566	SAP30-like
SLC19A2	ENSG00000117479	0.170801	0.000927773	0.021916	430	525	solute carrier family 19 (thiamine transporter), member 2
PIGH	ENSG00000100564	0.122398	0.000928169	0.021916	318	374	phosphatidylinositol glycan anchor biosynthesis, class H
CPT1A	ENSG00000110090,ENSG00000110090	0.138623	0.000929728	0.0219205	1697	2091	carnitine palmitoyltransferase 1A (liver)
ITIH5	ENSG00000123243,ENSG00000123243,ENSG00000123243	-0.13328	0.00093596	0.022035	36733	34182	inter-alpha-trypsin inhibitor heavy chain family, member 5
HSD17B11	ENSG00000198189	0.122145	0.000937698	0.0220435	1539	1797	hydroxysteroid (17-beta) dehydrogenase 11
SLFN5	ENSG00000166750	-0.234206	0.000942951	0.0221131	1048	799	schlafen family member 5
C19orf80	ENSG00000130173	-0.827966	0.000943423	0.0221131	988	482	chromosome 19 open reading frame 80
MAGOH	ENSG00000162385	0.108739	0.000945527	0.0221182	494	573	mago-nashi homolog, proliferation-associated (Drosophila)
DBNDD1	ENSG00000003249,ENSG00000003249	-0.283684	0.000946401	0.0221182	161	129	dysbindin (dystrobrevin binding protein 1) domain containing 1
SLC16A9	ENSG00000165449	-0.470657	0.00094836	0.0221233	59	41	solute carrier family 16, member 9 (monocarboxylic acid transporter 9)
KIAA0195	ENSG00000177728	0.0923915	0.00095188	0.0221233	2044	2390	KIAA0195
ALAS1	ENSG00000023330,ENSG00000023330	-0.140874	0.00095202	0.0221233	1550	1416	aminolevulinate, delta-, synthase 1
CCDC97	ENSG00000142039	0.0816911	0.00095283	0.0221233	583	667	coiled-coil domain containing 97
CPQ	ENSG00000104324	0.0947681	0.000955245	0.0221233	1664	1884	carboxypeptidase Q
THRA	ENSG00000126351,ENSG00000126351,ENSG00000126351,ENSG00000126351	0.0957447	0.000955783	0.0221233	1792	2089	thyroid hormone receptor, alpha
PCDH7	ENSG00000169851,ENSG00000169851	-0.348117	0.000956293	0.0221233	517	365	protocadherin 7
WDR33	ENSG00000136709,ENSG00000136709,ENSG00000136709	0.0781629	0.000960609	0.0221763	1538	1773	WD repeat domain 33
EIF2C1	ENSG00000092847	0.0799348	0.000961355	0.0221763	750	845	NA
PIKFYVE	ENSG00000115020,ENSG00000115020,ENSG00000115020	-0.133808	0.000970358	0.0223517	1453	1262	phosphoinositide kinase, FYVE finger containing
PPP1R11	ENSG00000204619	0.0846917	0.000974504	0.022415	911	1037	protein phosphatase 1, regulatory (inhibitor) subunit 11
WISP3	ENSG00000112761,ENSG00000266134,ENSG00000112761	0.373115	0.000981215	0.0225313	6	11	WNT1 inducible signaling pathway protein 3
HNRNPU	ENSG00000153187,ENSG00000153187	0.0962144	0.000982376	0.0225313	6604	7508	heterogeneous nuclear ribonucleoprotein U (scaffold attachment factor A)
SUPT3H	ENSG00000196284,ENSG00000196284	0.137107	0.000985229	0.0225322	116	140	suppressor of Ty 3 homolog (S. cerevisiae)
LOC100507246	NA	0.13572	0.000989151	0.0225451	1258	1530	NA
HAUS2	ENSG00000137814,ENSG00000137814	0.0997133	0.000989788	0.0225451	670	761	HAUS augmin-like complex, subunit 2
APH1A	ENSG00000117362,ENSG00000266334,ENSG00000117362,ENSG00000117362	0.0864771	0.000990018	0.0225451	3289	3746	APH1A gamma secretase subunit
MYL12B	ENSG00000118680,ENSG00000118680,ENSG00000118680	0.072415	0.000995963	0.0226483	8085	9174	myosin, light chain 12B, regulatory
UBE2R2	ENSG00000107341	0.0827113	0.000999636	0.0226995	2202	2476	ubiquitin-conjugating enzyme E2R 2
RABGGTA	ENSG00000100949,ENSG00000100949	-0.157698	0.0010135	0.0229817	885	809	Rab geranylgeranyltransferase, alpha subunit
MARVELD1	ENSG00000155254	0.133921	0.00101748	0.0230394	1511	1801	MARVEL domain containing 1
PPP1R9A	ENSG00000158528,ENSG00000158528,ENSG00000158528,ENSG00000158528	-0.207671	0.00102692	0.0232202	504	423	protein phosphatase 1, regulatory subunit 9A
HIST1H2AC	ENSG00000180573	-0.251586	0.00102853	0.0232238	192	153	histone cluster 1, H2ac
SNX9	ENSG00000130340	0.0795253	0.00103663	0.0233622	3083	3452	sorting nexin 9
SPTAN1	ENSG00000197694,ENSG00000197694	-0.143462	0.00103758	0.0233622	9492	8875	spectrin, alpha, non-erythrocytic 1
DPY19L2P2	ENSG00000170629,ENSG00000170629	-0.280782	0.00104178	0.0233626	166	139	dpy-19-like 2 pseudogene 2 (C. elegans)
RGS5	ENSG00000143248,ENSG00000143248,ENSG00000143248,ENSG00000143248,ENSG00000232995	-0.218149	0.00104197	0.0233626	16533	13732	regulator of G-protein signaling 5
RNASE4	ENSG00000258818,ENSG00000181784	0.163899	0.00104197	0.0233626	3945	4782	ribonuclease, RNase A family, 4
AFF3	ENSG00000144218,ENSG00000144218	-0.239151	0.0010462	0.0234246	600	491	AF4/FMR2 family, member 3
WHSC1	ENSG00000109685,ENSG00000109685,ENSG00000109685,ENSG00000109685,ENSG00000109685,ENSG00000109685,ENSG00000109685	0.108792	0.00104908	0.0234564	1215	1413	Wolf-Hirschhorn syndrome candidate 1
EBLN2	ENSG00000255423	-0.508949	0.00105195	0.0234706	13	8	endogenous Bornavirus-like nucleoprotein 2
EIF3C	ENSG00000184110,ENSG00000184110,ENSG00000184110	0.0973743	0.00105265	0.0234706	4871	5610	eukaryotic translation initiation factor 3, subunit C
CCPG1	ENSG00000260916,ENSG00000260916,ENSG00000260916,ENSG00000260916	-0.119788	0.00105543	0.0234999	3597	3261	cell cycle progression 1
LOC100130872	ENSG00000159674	-0.488491	0.00107458	0.0238931	127	83	NA
ANKRD13C	ENSG00000118454	0.0710502	0.00108105	0.0240034	659	729	ankyrin repeat domain 13C
BMP4	ENSG00000125378,ENSG00000125378,ENSG00000125378	-0.211741	0.00108436	0.0240436	378	324	bone morphogenetic protein 4
THUMPD2	ENSG00000138050	0.116842	0.00108645	0.0240493	214	256	THUMP domain containing 2
NAV3	ENSG00000067798	-0.189848	0.00108762	0.0240493	485	403	neuron navigator 3
TNFRSF21	ENSG00000146072	-0.142783	0.00109828	0.0242515	2629	2317	tumor necrosis factor receptor superfamily, member 21
EBAG9	ENSG00000147654,ENSG00000147654	0.0957102	0.00110146	0.0242808	503	575	estrogen receptor binding site associated, antigen, 9
C8orf4	ENSG00000176907	-0.334278	0.00110264	0.0242808	530	409	chromosome 8 open reading frame 4
MYH2	ENSG00000125414,ENSG00000125414	-0.952882	0.00110686	0.0243403	24	11	myosin, heavy chain 2, skeletal muscle, adult
SPCS2	ENSG00000118363	0.0731367	0.00111658	0.0245203	1625	1806	signal peptidase complex subunit 2 homolog (S. cerevisiae)
SRRM3	ENSG00000262321,ENSG00000177679,ENSG00000262321,ENSG00000177679	0.236315	0.00112267	0.0245885	79	110	serine/arginine repetitive matrix 3
TMEM22	ENSG00000168917,ENSG00000168917	0.135556	0.00112276	0.0245885	563	679	NA
RPL17-C18ORF32	ENSG00000215472,ENSG00000215472	0.471567	0.00112698	0.0246425	48	80	NA
SLC7A10	ENSG00000130876	0.271368	0.0011283	0.0246425	1320	1888	solute carrier family 7 (neutral amino acid transporter light chain, asc system), member 10
RPL3	ENSG00000100316	0.106411	0.00113727	0.0248046	29084	34489	ribosomal protein L3
MID1	ENSG00000101871,ENSG00000101871,ENSG00000101871,ENSG00000101871,ENSG00000101871	-0.218466	0.00114014	0.0248332	736	624	midline 1 (Opitz/BBB syndrome)
CD46	ENSG00000117335,ENSG00000117335,ENSG00000117335,ENSG00000117335,ENSG00000117335,ENSG00000117335,ENSG00000117335,ENSG00000117335	-0.091466	0.00114689	0.0249424	9570	8972	CD46 molecule, complement regulatory protein
EIF4EBP1	ENSG00000187840	0.215563	0.00114826	0.0249424	545	724	eukaryotic translation initiation factor 4E binding protein 1
PRKRA	ENSG00000180228,ENSG00000180228,ENSG00000180228	0.0872356	0.00115026	0.024952	989	1118	protein kinase, interferon-inducible double stranded RNA dependent activator
ARL6	ENSG00000113966,ENSG00000113966	-0.209834	0.00115196	0.024955	47	38	ADP-ribosylation factor-like 6
TNS3	ENSG00000136205	-0.119124	0.00115603	0.0250093	5752	5362	tensin 3
SVIP	ENSG00000198168	0.142111	0.00115842	0.0250272	194	229	small VCP/p97-interacting protein
SLC10A6	ENSG00000145283	0.297197	0.00116448	0.0251242	44	60	solute carrier family 10 (sodium/bile acid cotransporter family), member 6
EIF4A3	ENSG00000141543	0.0640571	0.00116687	0.0251418	845	939	eukaryotic translation initiation factor 4A3
ANKRD1	ENSG00000148677	-0.609041	0.00117284	0.0252365	14	9	ankyrin repeat domain 1 (cardiac muscle)
PSMB5	ENSG00000100804,ENSG00000100804,ENSG00000100804	-0.106735	0.00118043	0.0253659	2397	2291	proteasome (prosome, macropain) subunit, beta type, 5
RSC1A1	ENSG00000215695	-0.228662	0.00118615	0.0254044	159	125	regulatory solute carrier protein, family 1, member 1
PKNOX1	ENSG00000160199	0.0861858	0.00118657	0.0254044	364	420	PBX/knotted 1 homeobox 1
SAAL1	ENSG00000166788	0.0714824	0.00118837	0.0254044	170	192	serum amyloid A-like 1
ANP32B	ENSG00000136938	0.108348	0.00118857	0.0254044	2748	3211	acidic (leucine-rich) nuclear phosphoprotein 32 family, member B
LINC00184	ENSG00000224939	-0.450377	0.00119199	0.0254433	28	20	long intergenic non-protein coding RNA 184
NOTCH3	ENSG00000074181	-0.21254	0.00119394	0.0254511	10995	9434	notch 3
NCOA5	ENSG00000124160	0.0720513	0.00119603	0.0254617	789	910	nuclear receptor coactivator 5
CYP1A1	ENSG00000140465	0.814562	0.00120303	0.0255768	36	85	cytochrome P450, family 1, subfamily A, polypeptide 1
STX11	ENSG00000135604	0.129149	0.00122118	0.0258994	935	1099	syntaxin 11
C16orf71	ENSG00000166246	-0.311306	0.00122256	0.0258994	22	16	chromosome 16 open reading frame 71
CYP7B1	ENSG00000172817	-0.46616	0.00122381	0.0258994	105	60	cytochrome P450, family 7, subfamily B, polypeptide 1
GGCX	ENSG00000115486,ENSG00000115486	-0.132482	0.00122654	0.0258994	1327	1227	gamma-glutamyl carboxylase
TMCO6	ENSG00000113119	0.15471	0.00123006	0.0258994	246	310	transmembrane and coiled-coil domains 6
C12orf68	ENSG00000177875	-0.420651	0.00123029	0.0258994	58	42	chromosome 12 open reading frame 68
SLC38A11	ENSG00000169507,ENSG00000169507	-0.425296	0.00123165	0.0258994	17	12	solute carrier family 38, member 11
C4orf34	ENSG00000163683	-0.148522	0.00123262	0.0258994	785	692	NA
MFSD4	ENSG00000174514	0.209081	0.00123277	0.0258994	256	332	major facilitator superfamily domain containing 4
RSPH3	ENSG00000130363	-0.18567	0.00124139	0.0259823	104	87	radial spoke 3 homolog (Chlamydomonas)
UBE2H	ENSG00000186591,ENSG00000186591,ENSG00000186591	-0.0851495	0.00124143	0.0259823	4784	4613	ubiquitin-conjugating enzyme E2H
TMEM170B	ENSG00000205269	-0.388849	0.00124276	0.0259823	2131	1417	transmembrane protein 170B
TOMM20	ENSG00000173726	0.108767	0.00124321	0.0259823	3932	4490	translocase of outer mitochondrial membrane 20 homolog (yeast)
EFS	ENSG00000100842,ENSG00000100842	0.130639	0.00124589	0.0260045	744	908	embryonal Fyn-associated substrate
RBBP8	ENSG00000101773,ENSG00000101773,ENSG00000101773	0.148205	0.0012589	0.0262159	211	246	retinoblastoma binding protein 8
CDKL1	ENSG00000100490	-0.238669	0.00125929	0.0262159	68	54	cyclin-dependent kinase-like 1 (CDC2-related kinase)
SF1	ENSG00000168066,ENSG00000168066,ENSG00000168066,ENSG00000168066,ENSG00000168066,ENSG00000168066	0.0790711	0.00126207	0.0262343	4999	5822	splicing factor 1
DBX2	ENSG00000185610	-0.372173	0.00126387	0.0262343	41	30	developing brain homeobox 2
UGGT2	ENSG00000102595	-0.0891843	0.00126509	0.0262343	530	503	UDP-glucose glycoprotein glucosyltransferase 2
CASC3	ENSG00000108349	0.0814584	0.00126764	0.0262532	2626	3010	cancer susceptibility candidate 3
HRC	ENSG00000130528	-0.253618	0.0012749	0.0263554	163	131	histidine rich calcium binding protein
TAMM41	ENSG00000144559	0.125137	0.00127587	0.0263554	134	158	TAM41, mitochondrial translocator assembly and maintenance protein, homolog (S. cerevisiae)
WTAP	ENSG00000146457,ENSG00000146457,ENSG00000146457	0.0860262	0.00128426	0.0264944	1676	1926	Wilms tumor 1 associated protein
C1orf133	ENSG00000203706	0.237831	0.00128703	0.0265175	103	145	NA
TUBB2A	ENSG00000137267	-0.262084	0.00128919	0.0265278	5466	4622	tubulin, beta 2A class IIa
C14orf43	ENSG00000156030,ENSG00000156030	0.127774	0.0013113	0.0269481	1260	1489	NA
MEF2BNB	ENSG00000254901,ENSG00000254901	-0.168531	0.00131459	0.0269811	505	465	MEF2B neighbor
OGG1	ENSG00000114026,ENSG00000114026,ENSG00000114026,ENSG00000114026,ENSG00000114026,ENSG00000114026,ENSG00000114026,ENSG00000114026	0.0795324	0.00131924	0.0269975	374	433	8-oxoguanine DNA glycosylase
C1orf233	ENSG00000228594	-0.403627	0.00131965	0.0269975	87	60	chromosome 1 open reading frame 233
ITFG3	ENSG00000167930	-0.109629	0.00132329	0.0269975	3239	3085	integrin alpha FG-GAP repeat containing 3
KCNG1	ENSG00000026559	-0.678318	0.00132329	0.0269975	11	6	potassium voltage-gated channel, subfamily G, member 1
TBCEL	ENSG00000154114,ENSG00000154114	-0.119955	0.00132382	0.0269975	420	374	tubulin folding cofactor E-like
TTC7B	ENSG00000165914	0.116963	0.00133482	0.0271798	1024	1204	tetratricopeptide repeat domain 7B
BEX4	ENSG00000102409,ENSG00000102409	0.157087	0.00133615	0.0271798	545	640	brain expressed, X-linked 4
CHMP4B	ENSG00000101421	0.074665	0.0013398	0.0272194	3062	3445	charged multivesicular body protein 4B
TMEM74B	ENSG00000125895	-0.194227	0.00134707	0.0273324	286	264	transmembrane protein 74B
ITFG2	ENSG00000111203	0.097318	0.00135214	0.0274005	499	582	integrin alpha FG-GAP repeat containing 2
IDI1	ENSG00000067064	-0.176218	0.00135854	0.0274888	1236	1082	isopentenyl-diphosphate delta isomerase 1
CNBP	ENSG00000169714,ENSG00000169714,ENSG00000169714,ENSG00000169714,ENSG00000169714,ENSG00000169714	0.0736885	0.00135993	0.0274888	7523	8380	CCHC-type zinc finger, nucleic acid binding protein
CDKN2B	ENSG00000147883	-0.314148	0.0013656	0.0275685	4695	3458	cyclin-dependent kinase inhibitor 2B (p15, inhibits CDK4)
AACS	ENSG00000081760	-0.367486	0.00136867	0.0275958	1228	911	acetoacetyl-CoA synthetase
CCL18	ENSG00000006074	0.572523	0.00137238	0.0276357	315	532	chemokine (C-C motif) ligand 18 (pulmonary and activation-regulated)
TSHZ1	ENSG00000179981	0.0864841	0.00137562	0.0276662	968	1095	teashirt zinc finger homeobox 1
NIPAL2	ENSG00000104361	-0.172745	0.00138565	0.0278324	247	207	NIPA-like domain containing 2
ELMOD2	ENSG00000179387	-0.0907204	0.00138763	0.0278324	852	799	ELMO/CED-12 domain containing 2
SRSF4	ENSG00000116350	0.113517	0.0013891	0.0278324	2541	3093	serine/arginine-rich splicing factor 4
ACBD6	ENSG00000135847	0.0965644	0.00139231	0.0278618	554	643	acyl-CoA binding domain containing 6
ODZ1	ENSG00000009694,ENSG00000009694,ENSG00000009694	-0.205443	0.00139551	0.0278779	343	275	NA
PCOLCE2	ENSG00000163710	-0.153694	0.00139659	0.0278779	8511	7682	procollagen C-endopeptidase enhancer 2
ENDOU	ENSG00000111405,ENSG00000111405,ENSG00000111405	0.294361	0.00140489	0.0280086	27	40	endonuclease, polyU-specific
AHCTF1	ENSG00000153207	-0.125681	0.00140706	0.0280169	1586	1412	AT hook containing transcription factor 1
EPHB3	ENSG00000182580	-0.329208	0.00140966	0.0280339	177	137	EPH receptor B3
UMPS	ENSG00000114491	-0.113709	0.00142108	0.0281947	483	458	uridine monophosphate synthetase
PCDH17	ENSG00000118946	-0.290664	0.00142273	0.0281947	106	78	protocadherin 17
ERV3-1	ENSG00000213462	-0.227927	0.00142303	0.0281947	1063	844	endogenous retrovirus group 3, member 1
TF	ENSG00000091513	-0.338234	0.00142649	0.0282283	3178	2478	transferrin
ITIH3	ENSG00000162267	0.409645	0.00143138	0.0282794	12	19	inter-alpha-trypsin inhibitor heavy chain 3
CLIC3	ENSG00000169583	-0.512578	0.00143261	0.0282794	63	39	chloride intracellular channel 3
SRSF3	ENSG00000112081	0.0798173	0.00143543	0.0283002	3460	3958	serine/arginine-rich splicing factor 3
GTF2A1	ENSG00000165417,ENSG00000165417	-0.174027	0.00143791	0.0283142	133	107	general transcription factor IIA, 1, 19/37kDa
APOO	ENSG00000184831	-0.147672	0.00144543	0.0284275	221	203	apolipoprotein O
PGF	ENSG00000119630,ENSG00000119630	-0.297868	0.00144888	0.0284314	228	184	placental growth factor
ELF3	ENSG00000163435,ENSG00000163435	0.523722	0.00145049	0.0284314	8	15	E74-like factor 3 (ets domain transcription factor, epithelial-specific )
BCAM	ENSG00000187244,ENSG00000187244	-0.150916	0.001451	0.0284314	4036	3736	basal cell adhesion molecule (Lutheran blood group)
CLPTM1L	ENSG00000049656	-0.10251	0.00145274	0.0284314	3109	2972	CLPTM1-like
CIZ1	ENSG00000148337,ENSG00000148337,ENSG00000148337,ENSG00000148337,ENSG00000148337	0.0807066	0.00145709	0.0284587	2049	2332	CDKN1A interacting zinc finger protein 1
PCYOX1	ENSG00000116005	-0.164349	0.00145769	0.0284587	10568	9142	prenylcysteine oxidase 1
PDGFB	ENSG00000100311,ENSG00000100311	0.14912	0.00146206	0.0285041	2182	2770	platelet-derived growth factor beta polypeptide
REEP2	ENSG00000132563	-0.336487	0.00146357	0.0285041	374	274	receptor accessory protein 2
PLEKHG5	ENSG00000171680,ENSG00000171680,ENSG00000171680,ENSG00000171680,ENSG00000171680	-0.246006	0.00148602	0.028906	3818	3282	pleckstrin homology domain containing, family G (with RhoGef domain) member 5
PNPO	ENSG00000108439	-0.10225	0.00149541	0.0290329	783	743	pyridoxamine 5'-phosphate oxidase
PIGA	ENSG00000165195,ENSG00000165195	0.0963709	0.00149617	0.0290329	200	227	phosphatidylinositol glycan anchor biosynthesis, class A
CIDEB	ENSG00000136305	0.135776	0.00150816	0.0292302	503	608	cell death-inducing DFFA-like effector b
KAL1	ENSG00000011201	-0.255681	0.00151255	0.0292606	486	374	Kallmann syndrome 1 sequence
HERC5	ENSG00000138646	0.202417	0.00151339	0.0292606	246	313	HECT and RLD domain containing E3 ubiquitin protein ligase 5
LOC283070	NA	0.10991	0.00151887	0.0293257	342	405	NA
LRP5	ENSG00000162337	0.13079	0.00152042	0.0293257	4459	5332	low density lipoprotein receptor-related protein 5
KCNE3	ENSG00000175538	-0.184989	0.00152717	0.0294206	644	553	potassium voltage-gated channel, Isk-related family, member 3
PNMA2	ENSG00000240694	-0.246936	0.00153991	0.0296303	137	117	paraneoplastic Ma antigen 2
AGPAT3	ENSG00000160216,ENSG00000160216	-0.110436	0.00154271	0.0296486	2948	2784	1-acylglycerol-3-phosphate O-acyltransferase 3
SLC6A16	ENSG00000063127	0.24732	0.00154927	0.0297388	114	157	solute carrier family 6, member 16
NCOR2	ENSG00000196498,ENSG00000196498,ENSG00000196498	0.0907723	0.00155989	0.0299012	3007	3457	nuclear receptor corepressor 2
SH3RF2	ENSG00000156463	-0.165344	0.00156146	0.0299012	129	118	SH3 domain containing ring finger 2
PTAR1	ENSG00000188647	-0.141728	0.00156637	0.0299594	1104	947	protein prenyltransferase alpha subunit repeat containing 1
CACNA2D1	ENSG00000153956	-0.513327	0.0015763	0.0301133	566	317	calcium channel, voltage-dependent, alpha 2/delta subunit 1
STOX2	ENSG00000173320	-0.366612	0.00158196	0.0301855	38	25	storkhead box 2
ZNF395	ENSG00000186918	0.115757	0.00158512	0.0301966	1879	2194	zinc finger protein 395
ALOX15B	ENSG00000179593,ENSG00000179593,ENSG00000179593	1.10422	0.00158794	0.0301966	32	99	arachidonate 15-lipoxygenase, type B
GTDC1	ENSG00000121964,ENSG00000121964,ENSG00000121964	0.0909029	0.00158837	0.0301966	764	868	glycosyltransferase-like domain containing 1
ZNF16	ENSG00000170631,ENSG00000170631	0.103428	0.0015911	0.0301966	122	141	zinc finger protein 16
RPL9	ENSG00000163682,ENSG00000163682	0.119838	0.00159197	0.0301966	20550	24674	ribosomal protein L9
CCDC39	ENSG00000145075	-0.241173	0.00159393	0.0301979	71	57	coiled-coil domain containing 39
HIBCH	ENSG00000198130,ENSG00000198130	-0.125997	0.00159653	0.0302114	1183	1089	3-hydroxyisobutyryl-CoA hydrolase
EIF3D	ENSG00000100353	0.0652769	0.00160228	0.0302514	2838	3188	eukaryotic translation initiation factor 3, subunit D
GGA2	ENSG00000103365	0.114645	0.00160242	0.0302514	1625	1909	golgi-associated, gamma adaptin ear containing, ARF binding protein 2
HAUS5	ENSG00000249115	0.129138	0.00160525	0.0302691	409	503	HAUS augmin-like complex, subunit 5
ABCC6P1	ENSG00000256340	-0.359183	0.0016102	0.030298	65	49	ATP-binding cassette, sub-family C, member 6 pseudogene 1
RASL10B	ENSG00000141150	0.563007	0.00161151	0.030298	110	205	RAS-like, family 10, member B
NDUFAF2	ENSG00000164182	0.105488	0.00161246	0.030298	429	501	NADH dehydrogenase (ubiquinone) complex I, assembly factor 2
NME1	ENSG00000239672,ENSG00000239672	-0.14599	0.00161668	0.0303416	937	874	NME/NM23 nucleoside diphosphate kinase 1
PCLO	ENSG00000186472,ENSG00000186472	-0.411595	0.00162138	0.0303942	496	358	piccolo presynaptic cytomatrix protein
RHOC	ENSG00000155366,ENSG00000155366,ENSG00000155366	-0.145222	0.00162328	0.0303943	7759	7291	ras homolog family member C
BRP44	ENSG00000143158,ENSG00000143158	-0.138348	0.00162643	0.0304177	1933	1759	NA
SLC25A20	ENSG00000178537	-0.113059	0.00163101	0.0304677	1265	1190	solute carrier family 25 (carnitine/acylcarnitine translocase), member 20
AKAP1	ENSG00000121057,ENSG00000121057,ENSG00000121057	0.170049	0.00163494	0.0305056	2360	2929	A kinase (PRKA) anchor protein 1
SMURF1	ENSG00000198742,ENSG00000198742,ENSG00000198742	0.0891669	0.00163695	0.0305075	999	1162	SMAD specific E3 ubiquitin protein ligase 1
TMEM214	ENSG00000119777,ENSG00000119777	0.0825943	0.00164473	0.0306168	2456	2859	transmembrane protein 214
CSRP1	ENSG00000159176,ENSG00000159176,ENSG00000159176	0.148094	0.00165064	0.0306912	2776	3469	cysteine and glycine-rich protein 1
EMD	ENSG00000102119	0.0861169	0.00165636	0.0307618	1499	1716	emerin
MVD	ENSG00000167508	-0.278965	0.00166442	0.0308757	805	688	mevalonate (diphospho) decarboxylase
LCNL1	ENSG00000214402	-0.732569	0.00166924	0.0309292	30	15	lipocalin-like 1
RGS17	ENSG00000091844	0.300449	0.00168179	0.0311134	19	26	regulator of G-protein signaling 17
DTX4	ENSG00000110042	0.210073	0.00168307	0.0311134	1825	2420	deltex homolog 4 (Drosophila)
TUBA1B	ENSG00000123416	0.214706	0.00169462	0.0312909	11448	14908	tubulin, alpha 1b
ABCC11	ENSG00000121270,ENSG00000121270,ENSG00000121270	-0.452895	0.00169762	0.0313101	12	8	ATP-binding cassette, sub-family C (CFTR/MRP), member 11
ARHGEF9	ENSG00000131089,ENSG00000131089,ENSG00000131089	0.103935	0.00170391	0.0313184	409	485	Cdc42 guanine nucleotide exchange factor (GEF) 9
PLIN5	ENSG00000214456	0.235428	0.00170506	0.0313184	1195	1695	perilipin 5
ZFP36L1	ENSG00000185650,ENSG00000185650	0.127697	0.00170567	0.0313184	8452	10041	ZFP36 ring finger protein-like 1
ZCCHC24	ENSG00000165424	-0.0891682	0.00170589	0.0313184	5898	5631	zinc finger, CCHC domain containing 24
PPFIBP2	ENSG00000166387,ENSG00000166387,ENSG00000166387	-0.143598	0.00171362	0.0314243	597	547	PTPRF interacting protein, binding protein 2 (liprin beta 2)
TPT1-AS1	ENSG00000170919	0.198426	0.00171933	0.0314571	354	473	TPT1 antisense RNA 1
HMGXB4	ENSG00000100281	0.104488	0.00171935	0.0314571	461	526	HMG box domain containing 4
CCBL1	ENSG00000171097,ENSG00000171097,ENSG00000171097	0.157274	0.00172238	0.0314767	97	124	cysteine conjugate-beta lyase, cytoplasmic
CHP2	ENSG00000166869	-0.382729	0.00172573	0.0314986	21	15	calcineurin-like EF-hand protein 2
ZNF143	ENSG00000166478	0.101297	0.00172921	0.0314986	281	322	zinc finger protein 143
PLEKHM1P	ENSG00000214176	-0.148735	0.00172948	0.0314986	485	440	pleckstrin homology domain containing, family M (with RUN domain) member 1 pseudogene
C6	ENSG00000039537,ENSG00000039537	0.396674	0.00173356	0.0315371	211	332	complement component 6
CCND2	ENSG00000118971	-0.241398	0.0017458	0.0317097	2702	2379	cyclin D2
GLYCTK	ENSG00000168237,ENSG00000168237	0.249041	0.00174787	0.0317097	243	337	glycerate kinase
KDM1B	ENSG00000165097	0.122344	0.001749	0.0317097	312	358	lysine (K)-specific demethylase 1B
FAM105B	ENSG00000154124	-0.113782	0.00175471	0.0317636	415	380	family with sequence similarity 105, member B
PTPN12	ENSG00000127947,ENSG00000127947,ENSG00000127947	0.0660547	0.00175594	0.0317636	2868	3178	protein tyrosine phosphatase, non-receptor type 12
LONRF3	ENSG00000175556,ENSG00000175556	-0.33043	0.00175879	0.0317793	52	36	LON peptidase N-terminal domain and ring finger 3
C20orf24	ENSG00000101084,ENSG00000101084,ENSG00000101084,ENSG00000101084	-0.150523	0.00176296	0.0318188	1983	1827	chromosome 20 open reading frame 24
SLC25A22	ENSG00000177542,ENSG00000177542	0.133386	0.0017674	0.0318297	217	265	solute carrier family 25 (mitochondrial carrier: glutamate), member 22
OPA3	ENSG00000125741,ENSG00000125741	-0.0997993	0.00176985	0.0318297	583	567	optic atrophy 3 (autosomal recessive, with chorea and spastic paraplegia)
TNFRSF11B	ENSG00000164761	-0.362631	0.00177066	0.0318297	339	248	tumor necrosis factor receptor superfamily, member 11b
DECR2	ENSG00000242612	-0.139812	0.00177152	0.0318297	1037	966	2,4-dienoyl CoA reductase 2, peroxisomal
GGPS1	ENSG00000152904	-0.100402	0.00177514	0.0318589	983	931	geranylgeranyl diphosphate synthase 1
THTPA	ENSG00000259431,ENSG00000259431,ENSG00000259431,ENSG00000259431,ENSG00000157306	-0.091708	0.00178152	0.0319054	646	618	thiamine triphosphatase
LRP11	ENSG00000120256	0.129297	0.00178895	0.0319054	1233	1453	low density lipoprotein receptor-related protein 11
PRPH2	ENSG00000112619	-0.270414	0.00179054	0.0319054	39	32	peripherin 2 (retinal degeneration, slow)
UQCRB	ENSG00000156467,ENSG00000156467	0.0748371	0.00179078	0.0319054	4082	4644	ubiquinol-cytochrome c reductase binding protein
STX6	ENSG00000135823	-0.0942477	0.00179098	0.0319054	1122	1050	syntaxin 6
ZNF581	ENSG00000171425	0.136377	0.00179244	0.0319054	303	366	zinc finger protein 581
RPL21	ENSG00000122026	0.147249	0.00179342	0.0319054	5802	7215	ribosomal protein L21
LOC440028	ENSG00000245522	-0.524091	0.001795	0.0319054	11	7	NA
UNC45A	ENSG00000140553,ENSG00000140553	-0.064499	0.00179566	0.0319054	1922	1938	unc-45 homolog A (C. elegans)
NHLRC3	ENSG00000188811,ENSG00000188811	-0.114979	0.0017986	0.0319221	1962	1813	NHL repeat containing 3
DDX51	ENSG00000185163	0.121514	0.00180329	0.0319699	685	835	DEAD (Asp-Glu-Ala-Asp) box polypeptide 51
COL4A2	ENSG00000134871	-0.114156	0.00180915	0.0320384	37829	36284	collagen, type IV, alpha 2
LINC00312	ENSG00000237697	0.235484	0.00181593	0.032123	343	469	long intergenic non-protein coding RNA 312
GRIK2	ENSG00000164418,ENSG00000164418,ENSG00000164418	-0.254088	0.00182844	0.0323086	20	17	glutamate receptor, ionotropic, kainate 2
PPP1R26	ENSG00000196422	0.129051	0.00183181	0.0323324	488	583	protein phosphatase 1, regulatory subunit 26
DNPEP	ENSG00000123992	0.0698984	0.0018382	0.0324094	1407	1607	aspartyl aminopeptidase
MTCH2	ENSG00000109919	-0.170951	0.00184278	0.0324544	2866	2494	mitochondrial carrier 2
PPP1R16B	ENSG00000101445,ENSG00000101445	0.168555	0.00185723	0.0326545	1355	1725	protein phosphatase 1, regulatory subunit 16B
ABHD11-AS1	ENSG00000261908,ENSG00000225969	-0.462843	0.0018607	0.0326545	20	14	NA
LOC646168	NA	-0.330093	0.00186157	0.0326545	49	38	NA
ADPRHL1	ENSG00000153531,ENSG00000153531	-0.19866	0.0018623	0.0326545	89	78	ADP-ribosylhydrolase like 1
IL13RA1	ENSG00000131724	0.110274	0.00186535	0.0326722	2574	2925	interleukin 13 receptor, alpha 1
PTPN2	ENSG00000175354,ENSG00000175354,ENSG00000175354,ENSG00000175354	0.140412	0.00186946	0.0327084	415	495	protein tyrosine phosphatase, non-receptor type 2
TMEM111	ENSG00000125037	0.0851031	0.00187548	0.0327779	1544	1766	NA
ATL3	ENSG00000184743	-0.218202	0.00188604	0.0328861	470	361	atlastin GTPase 3
TXNRD2	ENSG00000184470	-0.124547	0.00188657	0.0328861	499	474	thioredoxin reductase 2
GEMIN6	ENSG00000152147	-0.112183	0.00188825	0.0328861	148	138	gem (nuclear organelle) associated protein 6
BAG6	ENSG00000204463	0.0547829	0.00188989	0.0328861	3873	4342	BCL2-associated athanogene 6
PTPMT1	ENSG00000110536,ENSG00000110536	0.074086	0.00191136	0.0331916	1074	1206	protein tyrosine phosphatase, mitochondrial 1
EIF2AK2	ENSG00000055332,ENSG00000055332,ENSG00000055332	-0.296602	0.0019129	0.0331916	342	246	eukaryotic translation initiation factor 2-alpha kinase 2
CCDC75	ENSG00000152133	-0.222658	0.00191488	0.0331916	274	218	NA
ADAMTS2	ENSG00000087116,ENSG00000087116	-0.162378	0.00191573	0.0331916	3662	3321	ADAM metallopeptidase with thrombospondin type 1 motif, 2
SMARCD1	ENSG00000066117,ENSG00000066117	0.0654314	0.00191821	0.0331985	1292	1473	SWI/SNF related, matrix associated, actin dependent regulator of chromatin, subfamily d, member 1
XRCC6	ENSG00000196419	0.0571619	0.00192544	0.0332877	4337	4817	X-ray repair complementing defective repair in Chinese hamster cells 6
GLOD4	ENSG00000167699	0.0623669	0.00194044	0.0335109	1287	1428	glyoxalase domain containing 4
LOC283888	ENSG00000259954	-0.573399	0.00194759	0.033537	11	7	NA
MEGF8	ENSG00000105429	-0.0992773	0.00194977	0.033537	2695	2584	multiple EGF-like-domains 8
AGMO	ENSG00000187546	0.220092	0.00195148	0.033537	77	98	alkylglycerol monooxygenase
PPP1R13L	ENSG00000104881,ENSG00000104881	0.192555	0.00195184	0.033537	506	687	protein phosphatase 1, regulatory subunit 13 like
CAP2	ENSG00000112186	-0.262975	0.00195243	0.033537	1621	1270	CAP, adenylate cyclase-associated protein, 2 (yeast)
EXOC3L1	ENSG00000179044	-0.234595	0.00195509	0.0335392	375	333	exocyst complex component 3-like 1
RANBP3	ENSG00000031823,ENSG00000031823,ENSG00000031823	0.0630825	0.00196183	0.0335392	1255	1415	RAN binding protein 3
MFAP5	ENSG00000197614	-0.246279	0.00196275	0.0335392	7539	6072	microfibrillar associated protein 5
CTGF	ENSG00000118523	0.391398	0.0019654	0.0335392	2245	3568	connective tissue growth factor
OLFM2	ENSG00000105088	-0.347438	0.00196603	0.0335392	3890	3036	olfactomedin 2
RPL8	ENSG00000161016,ENSG00000161016	0.129906	0.00196682	0.0335392	17108	20813	ribosomal protein L8
MED22	ENSG00000148297,ENSG00000148297	0.0756682	0.00196722	0.0335392	866	999	mediator complex subunit 22
UHMK1	ENSG00000152332,ENSG00000152332,ENSG00000152332	-0.128698	0.00197136	0.0335739	3523	3034	U2AF homology motif (UHM) kinase 1
SHISA3	ENSG00000178343	0.221995	0.00197586	0.0336147	79	102	shisa homolog 3 (Xenopus laevis)
CD248	ENSG00000174807	-0.263147	0.00199103	0.033837	15138	12458	CD248 molecule, endosialin
CEACAM8	ENSG00000124469	-0.593319	0.00199531	0.0338615	15	9	carcinoembryonic antigen-related cell adhesion molecule 8
ITPR2	ENSG00000123104	-0.17143	0.0019967	0.0338615	1085	917	inositol 1,4,5-trisphosphate receptor, type 2
ELOVL6	ENSG00000170522,ENSG00000170522	-0.647336	0.00200804	0.0340038	368	204	ELOVL fatty acid elongase 6
HEBP2	ENSG00000051620	0.162446	0.00201026	0.0340038	4760	5822	heme binding protein 2
COPS8	ENSG00000198612,ENSG00000198612	-0.064387	0.00201219	0.0340038	1443	1416	COP9 signalosome subunit 8
MAN2A2	ENSG00000196547	0.142653	0.00201359	0.0340038	3727	4545	mannosidase, alpha, class 2A, member 2
CST3	ENSG00000101439	-0.126031	0.00201987	0.0340504	24727	22514	cystatin C
HDGFRP3	ENSG00000166503	0.098331	0.00202061	0.0340504	552	626	NA
ADRB3	ENSG00000188778	-0.50276	0.00202386	0.0340694	61	45	adrenoceptor beta 3
BLMH	ENSG00000108578	-0.0595048	0.00202833	0.034105	869	866	bleomycin hydrolase
ANG	ENSG00000214274,ENSG00000214274	0.190365	0.00203024	0.034105	561	703	angiogenin, ribonuclease, RNase A family, 5
SORCS2	ENSG00000184985	0.302329	0.00203716	0.0341854	56	77	sortilin-related VPS10 domain containing receptor 2
DOK1	ENSG00000115325,ENSG00000115325	-0.0990914	0.00203933	0.034186	1370	1327	docking protein 1, 62kDa (downstream of tyrosine kinase 1)
CIAPIN1	ENSG00000005194	-0.0407197	0.00205061	0.0343391	600	620	cytokine induced apoptosis inhibitor 1
TNFRSF10A	ENSG00000104689	-0.281593	0.00206627	0.034564	93	76	tumor necrosis factor receptor superfamily, member 10a
NGDN	ENSG00000129460,ENSG00000129460	0.0583526	0.00206836	0.034564	536	601	neuroguidin, EIF4E binding protein
HNRNPA0	ENSG00000177733	0.0696651	0.00207632	0.0346609	3429	3796	heterogeneous nuclear ribonucleoprotein A0
OSCP1	ENSG00000116885,ENSG00000116885	-0.176046	0.00210023	0.0350236	286	251	organic solute carrier partner 1
MAGED1	ENSG00000179222,ENSG00000268018,ENSG00000179222,ENSG00000179222,ENSG00000268018	-0.116217	0.00211679	0.035263	1817	1703	melanoma antigen family D, 1
GPAM	ENSG00000119927,ENSG00000119927	-0.361476	0.00212168	0.0352981	32713	22143	glycerol-3-phosphate acyltransferase, mitochondrial
C1QTNF9B	ENSG00000205863,ENSG00000205863	-0.830468	0.00212331	0.0352981	35	20	C1q and tumor necrosis factor related protein 9B
CYP26B1	ENSG00000003137	0.229266	0.00212969	0.0353408	1511	2022	cytochrome P450, family 26, subfamily B, polypeptide 1
FHL1	ENSG00000022267,ENSG00000022267,ENSG00000022267,ENSG00000022267,ENSG00000022267,ENSG00000022267,ENSG00000022267	0.156978	0.00213307	0.0353408	61729	75533	four and a half LIM domains 1
SLC38A10	ENSG00000157637,ENSG00000157637	-0.105514	0.00213347	0.0353408	6129	5842	solute carrier family 38, member 10
SNHG1	ENSG00000255717	0.101001	0.00213471	0.0353408	588	695	small nucleolar RNA host gene 1 (non-protein coding)
EPG5	ENSG00000152223	-0.0896453	0.00214546	0.0354821	959	904	ectopic P-granules autophagy protein 5 homolog (C. elegans)
RBM3	ENSG00000102317,ENSG00000268489	0.119851	0.00215117	0.0355399	8503	10106	RNA binding motif (RNP1, RRM) protein 3
PATL1	ENSG00000166889	0.0856738	0.0021756	0.0358446	954	1076	protein associated with topoisomerase II homolog 1 (yeast)
TMC4	ENSG00000167608,ENSG00000167608	-0.352777	0.00217633	0.0358446	130	98	transmembrane channel-like 4
NKAPL	ENSG00000189134	-0.169977	0.00217879	0.0358446	93	82	NFKB activating protein-like
APOC1	ENSG00000130208	0.702805	0.00217921	0.0358446	1137	2210	apolipoprotein C-I
TAF4	ENSG00000130699	0.0914587	0.00218081	0.0358446	510	588	TAF4 RNA polymerase II, TATA box binding protein (TBP)-associated factor, 135kDa
TMBIM4	ENSG00000155957	0.0646122	0.00219426	0.0360287	2295	2523	transmembrane BAX inhibitor motif containing 4
C1orf192	ENSG00000188931	-0.244707	0.00220164	0.0361128	26	20	chromosome 1 open reading frame 192
CHMP7	ENSG00000147457	-0.0968643	0.00220786	0.0361778	1077	1033	charged multivesicular body protein 7
ZNF256	ENSG00000152454	0.138674	0.00222969	0.0364981	91	110	zinc finger protein 256
TINF2	ENSG00000092330,ENSG00000092330	-0.119352	0.00224209	0.0366448	1568	1492	TERF1 (TRF1)-interacting nuclear factor 2
CFDP1	ENSG00000153774	0.0833763	0.00224324	0.0366448	786	897	craniofacial development protein 1
PPPDE1	ENSG00000121644	-0.0967873	0.00224974	0.0366797	1455	1349	NA
LMNB2	ENSG00000176619	0.102736	0.00224995	0.0366797	535	634	lamin B2
SNHG12	ENSG00000197989	0.259728	0.00225582	0.0367379	286	390	small nucleolar RNA host gene 12 (non-protein coding)
GUCY1A2	ENSG00000152402	-0.205234	0.00226315	0.0368198	589	472	guanylate cyclase 1, soluble, alpha 2
HCFC1	ENSG00000172534	0.0541931	0.00226625	0.0368329	1265	1417	host cell factor C1 (VP16-accessory protein)
FANK1	ENSG00000203780	-0.247464	0.00227447	0.036929	25	21	fibronectin type III and ankyrin repeat domains 1
WWC2	ENSG00000151718	-0.150086	0.00228231	0.0370188	1233	1071	WW and C2 domain containing 2
MKL2	ENSG00000186260	-0.142132	0.00229723	0.037223	2144	1898	MKL/myocardin-like 2
CTNND1	ENSG00000198561,ENSG00000198561,ENSG00000198561,ENSG00000198561,ENSG00000198561,ENSG00000198561,ENSG00000198561,ENSG00000198561,ENSG00000198561,ENSG00000198561,ENSG00000198561,ENSG00000198561,ENSG00000198561,ENSG00000198561,ENSG00000198561,ENSG00000198561,ENSG00000198561,ENSG00000198561,ENSG00000198561,ENSG00000198561,ENSG00000198561,ENSG00000198561	0.0840392	0.00230774	0.0373555	5503	6371	catenin (cadherin-associated protein), delta 1
IST1	ENSG00000182149	0.0407264	0.00231358	0.0373855	2875	3171	increased sodium tolerance 1 homolog (yeast)
PABPC1	ENSG00000070756	0.0888264	0.00231426	0.0373855	15322	17105	poly(A) binding protein, cytoplasmic 1
RNPC3	ENSG00000185946	-0.220222	0.00232079	0.0374531	738	587	RNA-binding region (RNP1, RRM) containing 3
CDHR1	ENSG00000148600,ENSG00000148600	-1.01683	0.0023315	0.0375881	13	6	cadherin-related family member 1
NRXN3	ENSG00000021645,ENSG00000021645,ENSG00000021645	-0.293762	0.00233558	0.037616	103	82	neurexin 3
WLS	ENSG00000116729,ENSG00000116729,ENSG00000116729	-0.120392	0.00233958	0.0376425	1122	1031	wntless homolog (Drosophila)
MASP1	ENSG00000127241,ENSG00000127241,ENSG00000127241	-0.271943	0.00234301	0.0376599	472	374	mannan-binding lectin serine peptidase 1 (C4/C2 activating component of Ra-reactive factor)
RPGRIP1L	ENSG00000103494,ENSG00000103494	-0.262119	0.00234947	0.0377258	93	73	RPGRIP1-like
FURIN	ENSG00000140564	0.0649453	0.00235306	0.0377456	3534	3983	furin (paired basic amino acid cleaving enzyme)
GNB2L1	ENSG00000204628	0.088833	0.00235845	0.0377943	13616	15761	guanine nucleotide binding protein (G protein), beta polypeptide 2-like 1
LOC100133612	ENSG00000268811,ENSG00000236423	-0.458286	0.00236657	0.0378864	11	8	NA
ZNF699	ENSG00000196110,ENSG00000196110	-0.415629	0.00237263	0.0379455	23	14	zinc finger protein 699
COPS7A	ENSG00000111652,ENSG00000111652,ENSG00000111652,ENSG00000111652	-0.0520441	0.00238076	0.0380375	1792	1800	COP9 signalosome subunit 7A
SCRN1	ENSG00000136193,ENSG00000136193,ENSG00000136193,ENSG00000136193	0.156141	0.00239405	0.0381815	1194	1445	secernin 1
FUCA1	ENSG00000179163	0.281812	0.00239454	0.0381815	1172	1545	fucosidase, alpha-L- 1, tissue
SECISBP2	ENSG00000187742	0.111752	0.00240915	0.0383762	916	1107	SECIS binding protein 2
SNX5	ENSG00000089006,ENSG00000089006	0.0899163	0.00241618	0.0384498	3084	3495	sorting nexin 5
C7	ENSG00000112936	0.349222	0.00243308	0.0386804	1546	2230	complement component 7
CLIC6	ENSG00000159212	-0.198065	0.00243634	0.0386939	665	543	chloride intracellular channel 6
PRPSAP2	ENSG00000141127,ENSG00000141127,ENSG00000141127,ENSG00000141127,ENSG00000141127	0.0734627	0.00244475	0.0387355	330	375	phosphoribosyl pyrophosphate synthetase-associated protein 2
SLC25A25	ENSG00000148339,ENSG00000148339,ENSG00000148339,ENSG00000148339	0.165283	0.00244597	0.0387355	566	713	solute carrier family 25 (mitochondrial carrier; phosphate carrier), member 25
MGST3	ENSG00000143198	0.0933991	0.00244791	0.0387355	5503	6378	microsomal glutathione S-transferase 3
PUS7	ENSG00000091127	0.134669	0.00244864	0.0387355	250	300	pseudouridylate synthase 7 homolog (S. cerevisiae)
IMPA2	ENSG00000141401	0.210368	0.00245502	0.0387981	638	830	inositol(myo)-1(or 4)-monophosphatase 2
VPS18	ENSG00000104142	-0.0811927	0.00247102	0.0390124	784	775	vacuolar protein sorting 18 homolog (S. cerevisiae)
ELF2	ENSG00000109381,ENSG00000109381,ENSG00000109381	0.0736045	0.00247978	0.0391121	846	944	E74-like factor 2 (ets domain transcription factor)
DNAJC5B	ENSG00000147570	0.784857	0.00248381	0.0391371	11	24	DnaJ (Hsp40) homolog, subfamily C, member 5 beta
ATF7IP	ENSG00000171681	-0.159256	0.00248701	0.0391491	636	524	activating transcription factor 7 interacting protein
SEPT11	ENSG00000138758	-0.134304	0.00249404	0.0392212	7665	6913	septin 11
SLCO1C1	ENSG00000139155,ENSG00000139155,ENSG00000139155,ENSG00000139155	-0.25192	0.00250029	0.0392808	89	70	solute carrier organic anion transporter family, member 1C1
R3HDM2	ENSG00000179912,ENSG00000179912	0.0870004	0.00250462	0.0392875	1205	1392	R3H domain containing 2
DCAF12L2	ENSG00000198354	0.217908	0.00250563	0.0392875	27	34	DDB1 and CUL4 associated factor 12-like 2
RASSF4	ENSG00000107551	-0.172886	0.00250964	0.0392931	2470	2196	Ras association (RalGDS/AF-6) domain family member 4
RPS6KA2	ENSG00000071242,ENSG00000071242	0.102106	0.00251089	0.0392931	2323	2726	ribosomal protein S6 kinase, 90kDa, polypeptide 2
SEZ6	ENSG00000063015,ENSG00000063015	-0.48487	0.0025169	0.0393486	17	12	seizure related 6 homolog (mouse)
ENPP2	ENSG00000136960,ENSG00000136960,ENSG00000136960	0.189877	0.00252591	0.0394511	7090	8917	ectonucleotide pyrophosphatase/phosphodiesterase 2
SLCO3A1	ENSG00000176463,ENSG00000176463	0.068985	0.00252964	0.0394529	958	1066	solute carrier organic anion transporter family, member 3A1
C14orf176	ENSG00000232070	-0.199415	0.00253096	0.0394529	41	35	NA
TTC13	ENSG00000143643,ENSG00000143643	-0.0830603	0.00253533	0.0394697	591	582	tetratricopeptide repeat domain 13
HIST1H2BC	ENSG00000180596	-0.575128	0.00253697	0.0394697	58	35	histone cluster 1, H2bc
LSM10	ENSG00000181817	-0.0934688	0.00254143	0.0394905	712	685	LSM10, U7 small nuclear RNA associated
C7orf29	ENSG00000188707	-0.150552	0.00254454	0.0394905	146	131	NA
HTRA1	ENSG00000166033	-0.18474	0.0025457	0.0394905	16081	14173	HtrA serine peptidase 1
LOC553103	ENSG00000233006	-0.387935	0.00255382	0.0395781	73	54	NA
WBP11	ENSG00000084463	0.0850737	0.00255871	0.0396154	1257	1415	WW domain binding protein 11
C17orf51	ENSG00000212719	-0.0829125	0.00258083	0.0399175	373	361	chromosome 17 open reading frame 51
FGFBP2	ENSG00000137441	0.450974	0.0025832	0.0399175	260	412	fibroblast growth factor binding protein 2
SLC35D2	ENSG00000130958	0.105679	0.00258575	0.0399183	359	420	solute carrier family 35, member D2
C10orf35	ENSG00000171224	-0.177776	0.00259233	0.0399813	57	52	chromosome 10 open reading frame 35
STC1	ENSG00000159167	-0.558479	0.00261247	0.0402531	105	63	stanniocalcin 1
RPL18A	ENSG00000105640	0.133348	0.00262086	0.0403435	15236	18408	ribosomal protein L18a
SLC4A1	ENSG00000004939	-1.08687	0.00263874	0.0405798	45	26	solute carrier family 4, anion exchanger, member 1 (erythrocyte membrane protein band 3, Diego blood group)
NFX1	ENSG00000086102,ENSG00000086102,ENSG00000086102	0.101613	0.00265117	0.0407319	886	1032	nuclear transcription factor, X-box binding 1
WNT5B	ENSG00000111186,ENSG00000111186	-0.191817	0.00265801	0.0407978	116	100	wingless-type MMTV integration site family, member 5B
LRRN2	ENSG00000170382,ENSG00000170382	-0.365067	0.00266079	0.0408014	92	73	leucine rich repeat neuronal 2
IFNGR2	ENSG00000159128	0.0971131	0.00266875	0.0408843	3233	3735	interferon gamma receptor 2 (interferon gamma transducer 1)
CYTL1	ENSG00000170891	-0.469134	0.00268298	0.0410629	47	31	cytokine-like 1
C6orf211	ENSG00000146476	-0.0854538	0.00268644	0.0410699	856	808	chromosome 6 open reading frame 211
POLA1	ENSG00000101868	0.0813498	0.00268856	0.0410699	254	286	polymerase (DNA directed), alpha 1, catalytic subunit
C2orf18	ENSG00000213699	0.0937853	0.00270828	0.041315	1040	1197	NA
C11orf57	ENSG00000150776,ENSG00000262506,ENSG00000150776,ENSG00000150776	0.091721	0.00270977	0.041315	563	635	chromosome 11 open reading frame 57
FOXJ2	ENSG00000065970	0.0681286	0.00271451	0.0413479	997	1131	forkhead box J2
CERS2	ENSG00000143418,ENSG00000143418	0.0641693	0.00271885	0.0413501	2757	3025	ceramide synthase 2
THYN1	ENSG00000151500,ENSG00000151500,ENSG00000151500,ENSG00000151500,ENSG00000151500	0.0897788	0.00271982	0.0413501	730	848	thymocyte nuclear protein 1
FHL2	ENSG00000115641,ENSG00000115641,ENSG00000115641,ENSG00000115641	0.229719	0.00272279	0.041356	482	647	four and a half LIM domains 2
ACSF3	ENSG00000176715,ENSG00000176715,ENSG00000176715,ENSG00000176715	-0.0691128	0.00272725	0.0413626	418	413	acyl-CoA synthetase family member 3
KRT17	ENSG00000128422	1.58207	0.0027284	0.0413626	2	22	keratin 17
RASGRF2	ENSG00000113319	-0.197395	0.00273663	0.0414482	1341	1155	Ras protein-specific guanine nucleotide-releasing factor 2
CCBL2	ENSG00000137944,ENSG00000137944	0.127669	0.00274519	0.0415385	604	717	cysteine conjugate-beta lyase 2
COL4A5	ENSG00000188153,ENSG00000188153	-0.272417	0.00276439	0.0417264	164	133	collagen, type IV, alpha 5
IGFBP5	ENSG00000115461	-0.276177	0.00276727	0.0417264	38950	29998	insulin-like growth factor binding protein 5
SLC25A33	ENSG00000171612	-0.192509	0.00277014	0.0417264	948	807	solute carrier family 25 (pyrimidine nucleotide carrier), member 33
C5orf63	ENSG00000164241,ENSG00000164241	-0.231916	0.00277015	0.0417264	103	88	chromosome 5 open reading frame 63
GLYAT	ENSG00000149124,ENSG00000149124	-0.216505	0.00277167	0.0417264	2258	1892	glycine-N-acyltransferase
MAPKAPK5	ENSG00000089022,ENSG00000089022	0.101903	0.00277325	0.0417264	372	429	mitogen-activated protein kinase-activated protein kinase 5
PRDX6	ENSG00000117592	0.140624	0.00277967	0.0417462	10000	12093	peroxiredoxin 6
CSTF2	ENSG00000101811	-0.0925464	0.00277978	0.0417462	183	175	cleavage stimulation factor, 3' pre-RNA, subunit 2, 64kDa
AGXT	ENSG00000172482	-0.354339	0.00279297	0.041905	27	20	alanine-glyoxylate aminotransferase
ABCD2	ENSG00000173208	-0.294699	0.00279954	0.0419643	1164	854	ATP-binding cassette, sub-family D (ALD), member 2
LUST	NA	-0.302219	0.00280272	0.0419726	288	212	NA
USF2	ENSG00000105698,ENSG00000105698	0.0863861	0.00280899	0.0419766	4441	5073	upstream transcription factor 2, c-fos interacting
ADI1	ENSG00000182551	-0.0879708	0.0028097	0.0419766	3518	3425	acireductone dioxygenase 1
C4orf39	ENSG00000250486	-0.220877	0.00281085	0.0419766	34	29	NA
SELK	ENSG00000113811	0.0676849	0.00281501	0.0419996	898	1007	NA
CNTN2	ENSG00000184144	-0.453291	0.00282147	0.0420567	18	12	contactin 2 (axonal)
PGD	ENSG00000142657	-0.117674	0.00283239	0.0421802	6296	5974	phosphogluconate dehydrogenase
MPV17L2	ENSG00000254858	-0.139859	0.00285265	0.0424424	260	241	MPV17 mitochondrial membrane protein-like 2
DERA	ENSG00000023697	0.0745397	0.00285996	0.0425118	630	700	deoxyribose-phosphate aldolase (putative)
LOC285758	ENSG00000227502	0.562347	0.00286669	0.042538	6	11	NA
FUT7	ENSG00000180549	-0.354744	0.00286704	0.042538	16	12	fucosyltransferase 7 (alpha (1,3) fucosyltransferase)
RAE1	ENSG00000101146,ENSG00000101146	-0.058117	0.00287205	0.0425728	529	527	RAE1 RNA export 1 homolog (S. pombe)
ADAMTSL4	ENSG00000143382,ENSG00000143382	0.228544	0.00288538	0.0427233	1650	2196	ADAMTS-like 4
SIRT4	ENSG00000089163	-0.2475	0.00288985	0.0427233	33	28	sirtuin 4
NONO	ENSG00000147140,ENSG00000147140,ENSG00000147140,ENSG00000147140	0.050079	0.00289021	0.0427233	4518	5007	non-POU domain containing, octamer-binding
TMX3	ENSG00000166479	-0.0559683	0.00289575	0.0427381	2063	1994	thioredoxin-related transmembrane protein 3
ETAA1	ENSG00000143971	0.0669911	0.00290019	0.0427381	326	357	Ewing tumor-associated antigen 1
DDR2	ENSG00000162733,ENSG00000162733	-0.452987	0.00290131	0.0427381	1772	1052	discoidin domain receptor tyrosine kinase 2
GXYLT2	ENSG00000172986	0.167551	0.00290189	0.0427381	72	86	glucoside xylosyltransferase 2
FNDC3B	ENSG00000075420,ENSG00000075420	-0.108701	0.00291305	0.0428631	3047	2719	fibronectin type III domain containing 3B
ATP5J2	ENSG00000241468,ENSG00000241468,ENSG00000241468,ENSG00000241468	-0.105781	0.00291606	0.0428679	2562	2434	ATP synthase, H+ transporting, mitochondrial Fo complex, subunit F2
PQLC3	ENSG00000162976	0.0746678	0.00292483	0.0429575	1559	1729	PQ loop repeat containing 3
OAF	ENSG00000184232	-0.123522	0.00293612	0.0430773	3162	2927	OAF homolog (Drosophila)
TRIM28	ENSG00000130726	0.0862477	0.00293837	0.0430773	3132	3629	tripartite motif containing 28
ITGA1	ENSG00000213949	-0.211307	0.00294479	0.0431007	2388	1850	integrin, alpha 1
TMEM138	ENSG00000149483	-0.165669	0.00294535	0.0431007	1002	893	transmembrane protein 138
PRICKLE4	ENSG00000124593	-0.169686	0.00295191	0.0431573	324	305	prickle homolog 4 (Drosophila)
ZNF329	ENSG00000181894	0.14012	0.00295992	0.0432348	226	269	zinc finger protein 329
RGMB	ENSG00000174136	0.109207	0.00297044	0.0433489	469	534	RGM domain family, member B
ACAD11	ENSG00000240303	-0.10844	0.00298624	0.0434998	1680	1611	acyl-CoA dehydrogenase family, member 11
ALS2CR11	ENSG00000155754,ENSG00000155754,ENSG00000155754,ENSG00000155754	-0.239098	0.00298694	0.0434998	43	35	amyotrophic lateral sclerosis 2 (juvenile) chromosome region, candidate 11
ANKRD24	ENSG00000089847	-0.277011	0.00298893	0.0434998	75	65	ankyrin repeat domain 24
TRAPPC10	ENSG00000160218	0.0593079	0.00299543	0.0435548	1387	1528	trafficking protein particle complex 10
TMEM69	ENSG00000159596	-0.0928442	0.00299961	0.043576	650	619	transmembrane protein 69
MVK	ENSG00000110921,ENSG00000110921	-0.118475	0.00300669	0.0436151	374	361	mevalonate kinase
ARL6IP5	ENSG00000144746	-0.0894184	0.00300775	0.0436151	7471	7093	ADP-ribosylation-like factor 6 interacting protein 5
IDE	ENSG00000119912,ENSG00000119912	-0.0804222	0.00301351	0.043659	807	757	insulin-degrading enzyme
RPS29	ENSG00000213741,ENSG00000213741	0.0916343	0.00302108	0.0437292	13086	15235	ribosomal protein S29
C19orf66	ENSG00000130813	0.114973	0.00302763	0.0437844	964	1166	chromosome 19 open reading frame 66
MPHOSPH8	ENSG00000196199	0.0880723	0.00303956	0.0439172	1550	1773	M-phase phosphoprotein 8
KIAA1908	ENSG00000230487,ENSG00000230487,ENSG00000230487	-0.141109	0.00304946	0.0440206	420	391	NA
WBP2	ENSG00000132471	0.0769262	0.00308429	0.0444833	3265	3702	WW domain binding protein 2
MTRNR2L8	ENSG00000255823	-0.169277	0.0030893	0.0445153	60221	56069	MT-RNR2-like 8
B3GALT4	ENSG00000235863	-0.0895805	0.00309383	0.0445406	470	456	UDP-Gal:betaGlcNAc beta 1,3-galactosyltransferase, polypeptide 4
HUS1	ENSG00000136273	-0.139596	0.00311383	0.0447882	368	336	HUS1 checkpoint homolog (S. pombe)
TSTD1	ENSG00000215845,ENSG00000215845,ENSG00000215845	0.181282	0.00313193	0.044999	433	530	thiosulfate sulfurtransferase (rhodanese)-like domain containing 1
CCDC127	ENSG00000164366	-0.0834229	0.00313411	0.044999	394	379	coiled-coil domain containing 127
SLC22A3	ENSG00000146477	0.16013	0.00313973	0.0450216	502	606	solute carrier family 22 (extraneuronal monoamine transporter), member 3
APBB1IP	ENSG00000077420	-0.224175	0.0031413	0.0450216	3112	2595	amyloid beta (A4) precursor protein-binding, family B, member 1 interacting protein
TNFSF15	ENSG00000181634	-0.473258	0.00314639	0.0450542	60	36	tumor necrosis factor (ligand) superfamily, member 15
ZC3H4	ENSG00000130749	0.0863092	0.00316401	0.045266	747	866	zinc finger CCCH-type containing 4
CERK	ENSG00000100422	0.0877395	0.00316691	0.045267	1053	1208	ceramide kinase
LOC100506548	NA	0.112459	0.00317259	0.0453077	791	938	NA
SLC38A3	ENSG00000188338	-0.509099	0.00318526	0.0454482	26	18	solute carrier family 38, member 3
DPYD	ENSG00000188641,ENSG00000188641	0.0857238	0.0032018	0.0456296	1076	1166	dihydropyrimidine dehydrogenase
FCN2	ENSG00000160339,ENSG00000160339	-0.455896	0.00320367	0.0456296	37	22	ficolin (collagen/fibrinogen domain containing lectin) 2 (hucolin)
ANGPT1	ENSG00000154188,ENSG00000154188	-0.223871	0.0032071	0.0456378	2470	1970	angiopoietin 1
NPAS3	ENSG00000151322,ENSG00000151322,ENSG00000151322,ENSG00000151322	0.303375	0.00321503	0.0456755	41	56	neuronal PAS domain protein 3
MMAB	ENSG00000139428	-0.132452	0.00321546	0.0456755	656	618	methylmalonic aciduria (cobalamin deficiency) cblB type
ID4	ENSG00000172201	0.203173	0.00322699	0.0457987	2092	2684	inhibitor of DNA binding 4, dominant negative helix-loop-helix protein
SLC2A4RG	ENSG00000125520	0.110018	0.00323402	0.0458578	3712	4409	SLC2A4 regulator
ABHD4	ENSG00000100439	-0.13582	0.00323941	0.0458935	1735	1601	abhydrolase domain containing 4
TUBB6	ENSG00000176014	0.155793	0.00324659	0.0459546	5214	6523	tubulin, beta 6 class V
RFC3	ENSG00000133119,ENSG00000133119	0.0910817	0.00324953	0.0459556	199	226	replication factor C (activator 1) 3, 38kDa
GPRASP1	ENSG00000198932,ENSG00000198932,ENSG00000198932,ENSG00000198932	0.222785	0.00326472	0.04603	450	588	G protein-coupled receptor associated sorting protein 1
MLLT10	ENSG00000078403,ENSG00000078403,ENSG00000078403,ENSG00000078403,ENSG00000078403	0.109051	0.00326563	0.04603	830	955	myeloid/lymphoid or mixed-lineage leukemia (trithorax homolog, Drosophila); translocated to, 10
DNASE2	ENSG00000105612	-0.100135	0.00326778	0.04603	1532	1436	deoxyribonuclease II, lysosomal
COMMD5	ENSG00000170619,ENSG00000170619,ENSG00000170619	-0.0988363	0.00326831	0.04603	473	454	COMM domain containing 5
AZGP1	ENSG00000160862	0.274509	0.00326917	0.04603	596	862	alpha-2-glycoprotein 1, zinc-binding
SMPD4	ENSG00000136699,ENSG00000136699,ENSG00000136699	0.0671449	0.00329316	0.046327	1420	1631	sphingomyelin phosphodiesterase 4, neutral membrane (neutral sphingomyelinase-3)
ANKRD9	ENSG00000156381	0.161029	0.00329769	0.0463372	599	749	ankyrin repeat domain 9
DGKI	ENSG00000157680	-0.290603	0.00329967	0.0463372	56	42	diacylglycerol kinase, iota
WNT11	ENSG00000085741	0.18303	0.0033052	0.0463742	1286	1656	wingless-type MMTV integration site family, member 11
POLD3	ENSG00000077514	0.106299	0.0033208	0.0465282	304	350	polymerase (DNA-directed), delta 3, accessory subunit
EIF1B	ENSG00000114784	0.0753791	0.00332199	0.0465282	981	1099	eukaryotic translation initiation factor 1B
CKMT1B	ENSG00000237289	-0.73573	0.00332631	0.046548	18	11	creatine kinase, mitochondrial 1B
PRMT2	ENSG00000160310,ENSG00000160310,ENSG00000160310	0.058848	0.00335363	0.0468893	2596	2884	protein arginine methyltransferase 2
GLRX2	ENSG00000023572,ENSG00000023572	-0.167247	0.00335671	0.0468914	339	297	glutaredoxin 2
CHCHD7	ENSG00000170791,ENSG00000170791,ENSG00000170791,ENSG00000170791,ENSG00000170791,ENSG00000170791	0.0908624	0.00336525	0.0469382	427	495	coiled-coil-helix-coiled-coil-helix domain containing 7
AQP11	ENSG00000178301	-0.224765	0.00336592	0.0469382	133	110	aquaporin 11
CD164	ENSG00000135535,ENSG00000135535,ENSG00000135535,ENSG00000135535,ENSG00000135535	-0.138728	0.00337372	0.0470059	21023	18426	CD164 molecule, sialomucin
S100A16	ENSG00000188643	-0.114294	0.00338704	0.0471505	2734	2615	S100 calcium binding protein A16
FAM149B1	ENSG00000138286	0.0736811	0.00341333	0.0474162	545	609	family with sequence similarity 149, member B1
AQP7P3	ENSG00000156750	0.240666	0.0034155	0.0474162	646	892	aquaporin 7 pseudogene 3
DDX39B	ENSG00000198563,ENSG00000235439	0.0732796	0.00341768	0.0474162	4706	5508	DEAD (Asp-Glu-Ala-Asp) box polypeptide 39B
SLC38A4	ENSG00000139209,ENSG00000139209	-0.591918	0.00342308	0.0474162	33	19	solute carrier family 38, member 4
MAN1A1	ENSG00000111885	-0.141959	0.00342802	0.0474162	4392	3712	mannosidase, alpha, class 1A, member 1
PCNP	ENSG00000081154	0.0957368	0.00342819	0.0474162	2715	3059	PEST proteolytic signal containing nuclear protein
S100A8	ENSG00000143546	-0.707819	0.00342854	0.0474162	348	165	S100 calcium binding protein A8
ARHGEF11	ENSG00000132694,ENSG00000132694	0.0641431	0.00343241	0.0474162	1365	1517	Rho guanine nucleotide exchange factor (GEF) 11
PRICKLE1	ENSG00000139174,ENSG00000139174,ENSG00000139174,ENSG00000139174	0.113558	0.00343278	0.0474162	235	267	prickle homolog 1 (Drosophila)
UVRAG	ENSG00000198382	0.0905269	0.00343921	0.0474469	2090	2405	UV radiation resistance associated
UBE2D3	ENSG00000109332,ENSG00000109332,ENSG00000109332,ENSG00000109332,ENSG00000109332,ENSG00000109332,ENSG00000109332,ENSG00000109332,ENSG00000109332	0.0651548	0.00344093	0.0474469	5134	5653	ubiquitin-conjugating enzyme E2D 3
ZNRF3	ENSG00000183579,ENSG00000183579,ENSG00000183579	-0.224881	0.00344679	0.0474868	423	353	zinc and ring finger 3
FEN1	ENSG00000168496	-0.104401	0.00345168	0.0475131	296	281	flap structure-specific endonuclease 1
RBM8A	ENSG00000131795	0.0777379	0.00345464	0.0475131	1513	1722	RNA binding motif protein 8A
NHEJ1	ENSG00000187736	0.0825279	0.00346068	0.0475554	236	265	nonhomologous end-joining factor 1
MTRNR2L3	ENSG00000256222	-0.180959	0.00346946	0.0475967	2624	2438	MT-RNR2-like 3
SCARF2	ENSG00000244486,ENSG00000244486	0.139597	0.00346963	0.0475967	839	1037	scavenger receptor class F, member 2
CSAD	ENSG00000139631,ENSG00000139631	0.200853	0.0034744	0.0476213	2802	3755	cysteine sulfinic acid decarboxylase
NDST1	ENSG00000070614	-0.11373	0.0034783	0.0476339	5428	5103	N-deacetylase/N-sulfotransferase (heparan glucosaminyl) 1
SFT2D3	ENSG00000173349	0.060239	0.00348482	0.0476706	484	536	SFT2 domain containing 3
TXNL1	ENSG00000091164	-0.057995	0.00348693	0.0476706	1496	1474	thioredoxin-like 1
CDK2	ENSG00000123374,ENSG00000123374	0.0725289	0.00349035	0.0476717	378	436	cyclin-dependent kinase 2
PTGER2	ENSG00000125384	0.215846	0.00349297	0.0476717	294	373	prostaglandin E receptor 2 (subtype EP2), 53kDa
NAP1L5	ENSG00000177432	-0.125048	0.00350632	0.0477896	242	232	nucleosome assembly protein 1-like 5
CIR1	ENSG00000138433	0.0746317	0.00350758	0.0477896	872	983	corepressor interacting with RBPJ, 1
SYPL1	ENSG00000008282,ENSG00000008282	0.0898574	0.00351552	0.0478395	3535	4008	synaptophysin-like 1
FAM69B	ENSG00000165716	-0.160351	0.00351844	0.0478395	961	919	family with sequence similarity 69, member B
MMP17	ENSG00000198598	-0.237252	0.00352157	0.0478395	466	393	matrix metallopeptidase 17 (membrane-inserted)
EEA1	ENSG00000102189	-0.178245	0.00352319	0.0478395	1592	1287	early endosome antigen 1
RPL36AL	ENSG00000165502	0.103778	0.00353003	0.0478784	2885	3412	ribosomal protein L36a-like
TNPO3	ENSG00000064419,ENSG00000064419	0.0421435	0.00353204	0.0478784	1177	1281	transportin 3
SLCO2B1	ENSG00000137491,ENSG00000137491,ENSG00000137491	0.306128	0.00354285	0.0479844	929	1272	solute carrier organic anion transporter family, member 2B1
PPM1M	ENSG00000164088,ENSG00000164088	0.125675	0.00355588	0.0481201	864	1018	protein phosphatase, Mg2+/Mn2+ dependent, 1M
LAMB3	ENSG00000196878,ENSG00000196878,ENSG00000196878	-0.202745	0.00356091	0.0481475	2593	2240	laminin, beta 3
UBXN1	ENSG00000162191	0.106608	0.00356403	0.0481489	2124	2507	UBX domain protein 1
LBP	ENSG00000129988	-0.375166	0.0035723	0.04822	649	458	lipopolysaccharide binding protein
UGT1A7	ENSG00000244122	-0.882771	0.00357857	0.048264	45	19	UDP glucuronosyltransferase 1 family, polypeptide A7
MMP12	ENSG00000262406	-0.619608	0.00358198	0.0482692	41	24	matrix metallopeptidase 12 (macrophage elastase)
ZNF396	ENSG00000186496	-0.12886	0.00360085	0.0484162	62	55	zinc finger protein 396
C12orf35	ENSG00000174718	-0.153128	0.00360215	0.0484162	812	697	NA
TCEAL3	ENSG00000196507,ENSG00000196507	0.13793	0.00360744	0.0484162	340	409	transcription elongation factor A (SII)-like 3
C11orf58	ENSG00000110696	0.062547	0.00360759	0.0484162	3822	4217	chromosome 11 open reading frame 58
HSD17B14	ENSG00000087076	0.269523	0.003608	0.0484162	112	149	hydroxysteroid (17-beta) dehydrogenase 14
COL5A3	ENSG00000080573	-0.160127	0.00361346	0.0484488	9876	9193	collagen, type V, alpha 3
ESRG	ENSG00000265992	-0.201835	0.00362948	0.0486229	198	173	embryonic stem cell related (non-protein coding)
ASTN2	ENSG00000148219,ENSG00000148219,ENSG00000148219,ENSG00000148219,ENSG00000148219	-0.170897	0.00364451	0.0487834	1833	1533	astrotactin 2
STK24	ENSG00000102572,ENSG00000102572	0.0804796	0.00364895	0.0487839	1976	2194	serine/threonine kinase 24
EXT2	ENSG00000151348,ENSG00000151348,ENSG00000151348	-0.0457868	0.00365064	0.0487839	2012	2010	exostosin glycosyltransferase 2
ESR1	ENSG00000091831,ENSG00000091831,ENSG00000091831,ENSG00000091831	0.203869	0.00365642	0.0488204	266	339	estrogen receptor 1
PRCD	ENSG00000214140	0.242463	0.00366246	0.0488602	61	84	progressive rod-cone degeneration
LDLRAP1	ENSG00000157978	-0.0723432	0.00367043	0.0489258	838	841	low density lipoprotein receptor adaptor protein 1
KCNMA1	ENSG00000156113,ENSG00000156113,ENSG00000156113,ENSG00000156113	0.353946	0.00368065	0.0489965	95	135	potassium large conductance calcium-activated channel, subfamily M, alpha member 1
CCDC13	ENSG00000244607	-0.220145	0.00368387	0.0489965	18	15	coiled-coil domain containing 13
SAA1	ENSG00000173432,ENSG00000173432,ENSG00000173432	-0.455573	0.00368491	0.0489965	79276	57607	serum amyloid A1
U2AF1	ENSG00000160201,ENSG00000160201,ENSG00000160201	0.0869793	0.0036958	0.0491005	1375	1592	U2 small nuclear RNA auxiliary factor 1
STARD3NL	ENSG00000010270	0.0724102	0.00370225	0.0491453	718	806	STARD3 N-terminal like
PALLD	ENSG00000129116,ENSG00000129116,ENSG00000129116,ENSG00000129116	-0.113761	0.00371186	0.0492322	4836	4508	palladin, cytoskeletal associated protein
HS3ST2	ENSG00000122254	0.473543	0.00371722	0.0492624	88	138	heparan sulfate (glucosamine) 3-O-sulfotransferase 2
PCID2	ENSG00000126226,ENSG00000126226,ENSG00000126226	0.0440748	0.00374566	0.0495769	700	772	PCI domain containing 2
VIT	ENSG00000205221,ENSG00000205221,ENSG00000205221,ENSG00000205221,ENSG00000205221	-0.189605	0.00374926	0.0495769	415	365	vitrin
ZMYND8	ENSG00000101040,ENSG00000101040,ENSG00000101040	0.0878282	0.00375139	0.0495769	683	786	zinc finger, MYND-type containing 8
ACSL3	ENSG00000123983,ENSG00000123983	-0.146253	0.00375334	0.0495769	1516	1326	acyl-CoA synthetase long-chain family member 3
CTSC	ENSG00000109861,ENSG00000109861,ENSG00000109861	0.204412	0.00377115	0.0497711	3116	3783	cathepsin C
TLE6	ENSG00000104953,ENSG00000104953	-0.358243	0.00377599	0.049794	26	20	transducin-like enhancer of split 6 (E(sp1) homolog, Drosophila)
ANKMY2	ENSG00000106524	0.0725845	0.00378981	0.049935	589	660	ankyrin repeat and MYND domain containing 2
FAM198B	ENSG00000164125,ENSG00000164125,ENSG00000164125	-0.171523	0.00379609	0.0499766	7074	5982	family with sequence similarity 198, member B
PRKAR2B	ENSG00000005249	0.201034	0.00383133	0.0503992	13827	17117	protein kinase, cAMP-dependent, regulatory, type II, beta
PTPLA	ENSG00000165996	0.201042	0.00384417	0.0505266	81	104	protein tyrosine phosphatase-like (proline instead of catalytic arginine), member A
PEBP1	ENSG00000089220	-0.0864841	0.00384955	0.0505558	11436	11000	phosphatidylethanolamine binding protein 1
FAM73A	ENSG00000180488	-0.113196	0.00386236	0.050623	691	623	family with sequence similarity 73, member A
CSDA	ENSG00000060138,ENSG00000060138	0.10545	0.00386573	0.050623	3422	3940	NA
GSTZ1	ENSG00000100577,ENSG00000100577,ENSG00000100577	-0.128399	0.00386699	0.050623	473	455	glutathione S-transferase zeta 1
UBE2L6	ENSG00000156587,ENSG00000156587	0.100715	0.00386732	0.050623	899	1030	ubiquitin-conjugating enzyme E2L 6
GNRHR2	ENSG00000211451,ENSG00000263696	0.160744	0.00387761	0.0507162	178	220	gonadotropin-releasing hormone (type 2) receptor 2
SRRT	ENSG00000087087,ENSG00000087087,ENSG00000087087,ENSG00000087087	0.118002	0.00388772	0.050795	1734	2133	serrate RNA effector molecule homolog (Arabidopsis)
ALAS2	ENSG00000158578,ENSG00000158578,ENSG00000158578	-1.51929	0.00389289	0.050795	125	58	aminolevulinate, delta-, synthase 2
RGPD4	ENSG00000196862	-0.337369	0.00389557	0.050795	67	53	RANBP2-like and GRIP domain containing 4
PMM1	ENSG00000100417	0.115554	0.00389633	0.050795	868	1038	phosphomannomutase 1
AK1	ENSG00000106992	-0.117553	0.00391016	0.0509339	1522	1441	adenylate kinase 1
EPB41L4B	ENSG00000095203,ENSG00000095203	0.183744	0.00391767	0.0509903	2041	2546	erythrocyte membrane protein band 4.1 like 4B
STK16	ENSG00000115661	-0.0667443	0.00392449	0.0510091	447	443	serine/threonine kinase 16
PI4KAP2	ENSG00000183506	0.157365	0.00392549	0.0510091	695	880	phosphatidylinositol 4-kinase, catalytic, alpha pseudogene 2
DAZAP2	ENSG00000183283,ENSG00000183283,ENSG00000183283,ENSG00000183283,ENSG00000183283,ENSG00000183283	0.0762008	0.00393851	0.0511367	5150	5763	DAZ associated protein 2
MAN2A1	ENSG00000112893	-0.208908	0.00395142	0.0512628	472	364	mannosidase, alpha, class 2A, member 1
YY1	ENSG00000100811	0.0766109	0.00396042	0.0512981	1459	1608	YY1 transcription factor
C6orf130	ENSG00000124596	0.0895901	0.00396055	0.0512981	466	528	NA
TLE2	ENSG00000065717,ENSG00000065717,ENSG00000065717	-0.165261	0.00397063	0.0513553	1992	1820	transducin-like enhancer of split 2 (E(sp1) homolog, Drosophila)
ANKHD1-EIF4EBP3	ENSG00000131503	-0.137758	0.00397139	0.0513553	565	512	ANKHD1-EIF4EBP3 readthrough
DAXX	ENSG00000204209	-0.0609065	0.00398271	0.0514602	972	971	death-domain associated protein
FAM166A	ENSG00000188163	-0.393009	0.00398628	0.0514648	30	22	family with sequence similarity 166, member A
LINC00478	ENSG00000215386	-0.174599	0.00398955	0.0514655	206	180	long intergenic non-protein coding RNA 478
GCLM	ENSG00000023909	-0.180044	0.00400708	0.05165	712	615	glutamate-cysteine ligase, modifier subunit
TAF1D	ENSG00000166012	0.0903051	0.00402536	0.0518439	323	365	TATA box binding protein (TBP)-associated factor, RNA polymerase I, D, 41kDa
IDH1	ENSG00000138413	-0.190528	0.00404064	0.0519989	6752	5766	isocitrate dehydrogenase 1 (NADP+), soluble
PLEKHA1	ENSG00000107679,ENSG00000107679,ENSG00000107679,ENSG00000107679	-0.0912183	0.00404754	0.0520459	1276	1192	pleckstrin homology domain containing, family A (phosphoinositide binding specific) member 1
CDR1	ENSG00000184258	-0.263085	0.00405307	0.0520751	67	52	cerebellar degeneration-related protein 1, 34kDa
SMARCB1	ENSG00000099956,ENSG00000099956	0.0768974	0.0040764	0.0523328	839	953	SWI/SNF related, matrix associated, actin dependent regulator of chromatin, subfamily b, member 1
HSPA12A	ENSG00000165868	-0.160555	0.00408152	0.0523566	3544	3213	heat shock 70kDa protein 12A
CYB5D2	ENSG00000167740	-0.0940732	0.0040979	0.0524963	914	883	cytochrome b5 domain containing 2
TAF5L	ENSG00000135801,ENSG00000135801	0.0621962	0.00410075	0.0524963	691	774	TAF5-like RNA polymerase II, p300/CBP-associated factor (PCAF)-associated factor, 65kDa
TNFAIP1	ENSG00000109079	-0.106417	0.00410225	0.0524963	1500	1450	tumor necrosis factor, alpha-induced protein 1 (endothelial)
SLC13A5	ENSG00000141485,ENSG00000141485	0.49502	0.00411356	0.052599	7	12	solute carrier family 13 (sodium-dependent citrate transporter), member 5
DIRC3	ENSG00000231672	-0.40167	0.00411694	0.0526002	135	100	disrupted in renal carcinoma 3
LIG4	ENSG00000174405,ENSG00000174405,ENSG00000174405	-0.12347	0.00412272	0.0526321	420	375	ligase IV, DNA, ATP-dependent
DIO2	ENSG00000211448,ENSG00000211448,ENSG00000211448,ENSG00000211448,ENSG00000211448,ENSG00000211448,ENSG00000211448	-0.532828	0.00413312	0.0527227	65	41	deiodinase, iodothyronine, type II
RNF220	ENSG00000187147	0.0525265	0.00414406	0.0528203	1040	1161	ring finger protein 220
CCDC59	ENSG00000133773,ENSG00000133773	0.0866905	0.00416128	0.0529976	434	497	coiled-coil domain containing 59
DPP8	ENSG00000074603,ENSG00000074603,ENSG00000074603,ENSG00000074603	-0.20319	0.0041797	0.0531899	505	390	dipeptidyl-peptidase 8
NCF1B	ENSG00000262984,ENSG00000182487	-0.355526	0.00420435	0.0534489	118	89	neutrophil cytosolic factor 1B pseudogene
NBPF7	ENSG00000203832	-0.256741	0.00420673	0.0534489	88	68	neuroblastoma breakpoint family, member 7
ME3	ENSG00000151376,ENSG00000151376,ENSG00000151376	0.109428	0.00421089	0.0534593	1059	1271	malic enzyme 3, NADP(+)-dependent, mitochondrial
RHEB	ENSG00000106615	0.0746203	0.00421542	0.0534744	2198	2454	Ras homolog enriched in brain
CAMKMT	ENSG00000143919	-0.130396	0.004226	0.0535613	149	139	calmodulin-lysine N-methyltransferase
SEC13	ENSG00000157020,ENSG00000157020	-0.0624893	0.00423026	0.0535613	1901	1896	SEC13 homolog (S. cerevisiae)
RPL13AP5	ENSG00000236552	0.114591	0.00423231	0.0535613	22316	26799	ribosomal protein L13a pseudogene 5
CD63	ENSG00000135404,ENSG00000135404	0.112737	0.00423639	0.0535706	22212	26020	CD63 molecule
FAM120C	ENSG00000184083,ENSG00000184083	0.107123	0.00424142	0.0535915	346	401	family with sequence similarity 120C
CWF19L2	ENSG00000152404	0.124007	0.00424474	0.0535915	336	394	CWF19-like 2, cell cycle control (S. pombe)
LANCL1	ENSG00000115365,ENSG00000115365,ENSG00000115365	-0.129864	0.00425518	0.0536686	2548	2254	LanC lantibiotic synthetase component C-like 1 (bacterial)
ZBTB2	ENSG00000181472	0.082308	0.00425755	0.0536686	327	363	zinc finger and BTB domain containing 2
NAA40	ENSG00000110583	-0.124572	0.0042694	0.0537757	515	486	N(alpha)-acetyltransferase 40, NatD catalytic subunit, homolog (S. cerevisiae)
ADRB2	ENSG00000169252	0.141952	0.00428081	0.0538433	455	556	adrenoceptor beta 2, surface
PHB2	ENSG00000215021,ENSG00000215021	0.0732405	0.00428322	0.0538433	3286	3733	prohibitin 2
NALCN	ENSG00000102452	-0.613511	0.00428486	0.0538433	23	13	sodium leak channel, non-selective
SLC4A3	ENSG00000114923,ENSG00000114923	-0.206242	0.00431735	0.0542006	235	203	solute carrier family 4, anion exchanger, member 3
CCDC53	ENSG00000120860	-0.0750165	0.00432007	0.0542006	752	734	coiled-coil domain containing 53
LARP1B	ENSG00000138709,ENSG00000138709,ENSG00000138709	0.107102	0.00434393	0.0544573	304	344	La ribonucleoprotein domain family, member 1B
PTTG1IP	ENSG00000183255	0.0520433	0.0043632	0.0546561	4874	5378	pituitary tumor-transforming 1 interacting protein
OXSR1	ENSG00000172939	0.0763913	0.00437267	0.0547318	1315	1477	oxidative stress responsive 1
VPS13A	ENSG00000197969,ENSG00000197969,ENSG00000197969,ENSG00000197969	-0.160169	0.00437951	0.0547746	707	589	vacuolar protein sorting 13 homolog A (S. cerevisiae)
GLB1L2	ENSG00000149328	0.305095	0.00439058	0.0548702	25	36	galactosidase, beta 1-like 2
HECA	ENSG00000112406	0.0616252	0.0043976	0.0549151	1469	1593	headcase homolog (Drosophila)
FCGR3A	ENSG00000203747,ENSG00000203747,ENSG00000203747,ENSG00000203747,ENSG00000203747	0.548453	0.0044013	0.0549185	631	1083	Fc fragment of IgG, low affinity IIIa, receptor (CD16a)
ALDH9A1	ENSG00000143149	-0.132274	0.00441043	0.0549515	6942	6318	aldehyde dehydrogenase 9 family, member A1
FAM208B	ENSG00000108021	-0.111328	0.00441081	0.0549515	766	680	family with sequence similarity 208, member B
TUBA8	ENSG00000183785,ENSG00000183785	-0.221745	0.00442591	0.0550571	250	215	tubulin, alpha 8
KLHL5	ENSG00000109790,ENSG00000109790,ENSG00000109790,ENSG00000109790	-0.158118	0.00442616	0.0550571	3369	2958	kelch-like family member 5
TRIL	ENSG00000176734	0.173558	0.00443241	0.0550577	363	449	TLR4 interactor with leucine-rich repeats
RCOR2	ENSG00000167771	-0.250155	0.00443309	0.0550577	42	35	REST corepressor 2
PRRC2A	ENSG00000231370,ENSG00000204469,ENSG00000226618,ENSG00000231825,ENSG00000225748,ENSG00000206427,ENSG00000225164	0.0614542	0.00443776	0.055073	3570	3994	proline-rich coiled-coil 2A
SENP6	ENSG00000112701,ENSG00000112701	0.068048	0.0044493	0.0551734	1946	2153	SUMO1/sentrin specific peptidase 6
ATG9A	ENSG00000198925,ENSG00000198925	-0.0648948	0.00445695	0.0552254	1905	1898	autophagy related 9A
ZNF763	ENSG00000197054	0.167105	0.00446396	0.0552696	108	133	zinc finger protein 763
TMEM67	ENSG00000164953,ENSG00000164953	-0.147452	0.0044922	0.0555763	228	201	transmembrane protein 67
LOC100505967	ENSG00000258548	-0.448628	0.00449609	0.0555814	13	8	NA
IDH2	ENSG00000182054	-0.183885	0.00450033	0.0555909	1368	1196	isocitrate dehydrogenase 2 (NADP+), mitochondrial
ZNHIT3	ENSG00000108278	0.0708269	0.00450813	0.0556444	501	565	zinc finger, HIT-type containing 3
SNRPE	ENSG00000182004	0.0771461	0.00451312	0.055659	741	846	small nuclear ribonucleoprotein polypeptide E
LINC00242	ENSG00000229214	-0.471148	0.00451903	0.055659	16	11	long intergenic non-protein coding RNA 242
MED20	ENSG00000124641	-0.091514	0.00452391	0.055659	369	353	mediator complex subunit 20
PCIF1	ENSG00000100982	0.0742702	0.00452549	0.055659	1003	1142	PDX1 C-terminal inhibiting factor 1
BRD7	ENSG00000166164,ENSG00000166164	0.0703439	0.00452999	0.055659	1133	1265	bromodomain containing 7
GSTM3	ENSG00000134202,ENSG00000134202	-0.151341	0.00453018	0.055659	1618	1486	glutathione S-transferase mu 3 (brain)
HEATR5A	ENSG00000129493	-0.0930194	0.0045353	0.0556792	1087	999	HEAT repeat containing 5A
LRBA	ENSG00000198589,ENSG00000198589	-0.102093	0.0045411	0.0557076	798	725	LPS-responsive vesicle trafficking, beach and anchor containing
NKIRAS1	ENSG00000197885	-0.122678	0.00454894	0.0557186	363	332	NFKB inhibitor interacting Ras-like 1
MARCKS	ENSG00000155130	0.151734	0.00454896	0.0557186	5228	6194	myristoylated alanine-rich protein kinase C substrate
ZFYVE21	ENSG00000100711,ENSG00000100711	0.0648136	0.00455779	0.055774	2135	2419	zinc finger, FYVE domain containing 21
C20orf11	ENSG00000101193	0.0548299	0.00456316	0.055774	952	1057	NA
PTPRT	ENSG00000196090,ENSG00000196090	0.31906	0.00456393	0.055774	57	77	protein tyrosine phosphatase, receptor type, T
ARL3	ENSG00000138175	0.0997662	0.00458453	0.055983	419	487	ADP-ribosylation factor-like 3
DLEU1	ENSG00000176124	-0.252485	0.00458833	0.0559867	60	49	deleted in lymphocytic leukemia 1 (non-protein coding)
ANKRD22	ENSG00000152766	-0.900927	0.00459508	0.0560263	14	6	ankyrin repeat domain 22
C17orf49	ENSG00000258315,ENSG00000258315,ENSG00000258315	0.133605	0.00460387	0.0560908	975	1197	chromosome 17 open reading frame 49
SCLY	ENSG00000132330	0.132775	0.00462449	0.0562993	162	198	selenocysteine lyase
C6orf62	ENSG00000112308	0.0827748	0.00463784	0.0564189	4292	4811	chromosome 6 open reading frame 62
C1QC	ENSG00000159189,ENSG00000159189	0.34795	0.00464142	0.0564195	3475	4783	complement component 1, q subcomponent, C chain
MACF1	ENSG00000127603	-0.0909603	0.00464721	0.056447	6168	5810	microtubule-actin crosslinking factor 1
KCND2	ENSG00000184408	-0.144693	0.00465264	0.0564702	211	184	potassium voltage-gated channel, Shal-related subfamily, member 2
TEX261	ENSG00000144043	0.0757886	0.0046785	0.056741	2777	3136	testis expressed 261
SNRPF	ENSG00000139343	0.0814432	0.00468977	0.0568346	571	649	small nuclear ribonucleoprotein polypeptide F
MGST2	ENSG00000085871,ENSG00000085871,ENSG00000085871	0.0803182	0.0047065	0.0569866	1086	1237	microsomal glutathione S-transferase 2
SAMD1	ENSG00000141858	0.126072	0.00471036	0.0569866	525	632	sterile alpha motif domain containing 1
ACTR1B	ENSG00000115073	0.0534209	0.00471658	0.0569866	1843	2081	ARP1 actin-related protein 1 homolog B, centractin beta (yeast)
TRIT1	ENSG00000043514	0.0834324	0.00471941	0.0569866	263	304	tRNA isopentenyltransferase 1
VEGFC	ENSG00000150630	-0.198322	0.00472109	0.0569866	407	355	vascular endothelial growth factor C
TP53I13	ENSG00000167543	0.152724	0.00472367	0.0569866	1764	2223	tumor protein p53 inducible protein 13
ZFC3H1	ENSG00000133858	-0.115313	0.00474338	0.0571813	1146	1031	zinc finger, C3H1-type containing
LOC100134368	ENSG00000236829	0.487176	0.00475135	0.0572249	6	11	NA
TIMM8B	ENSG00000150779,ENSG00000150779	-0.0981122	0.00475415	0.0572249	721	696	translocase of inner mitochondrial membrane 8 homolog B (yeast)
REPS1	ENSG00000135597,ENSG00000135597	0.0682278	0.00477787	0.0574059	565	634	RALBP1 associated Eps domain containing 1
FBXO11	ENSG00000138081,ENSG00000138081	0.0608116	0.00477914	0.0574059	1896	2066	F-box protein 11
CAMK2D	ENSG00000145349,ENSG00000145349,ENSG00000145349,ENSG00000145349,ENSG00000145349,ENSG00000145349	0.0869906	0.00477994	0.0574059	1590	1765	calcium/calmodulin-dependent protein kinase II delta
DYNC1I1	ENSG00000158560,ENSG00000158560,ENSG00000158560	-0.15892	0.00480606	0.0576764	98	90	dynein, cytoplasmic 1, intermediate chain 1
LINC00310	ENSG00000227456,ENSG00000227456	0.185352	0.0048235	0.0578117	76	95	long intergenic non-protein coding RNA 310
MCMBP	ENSG00000197771,ENSG00000197771	0.0762988	0.00482912	0.0578117	1275	1413	minichromosome maintenance complex binding protein
CXCR1	ENSG00000163464	-0.677957	0.0048295	0.0578117	33	18	chemokine (C-X-C motif) receptor 1
IQSEC2	ENSG00000124313,ENSG00000124313	0.0815717	0.00483178	0.0578117	579	658	IQ motif and Sec7 domain 2
MYO18B	ENSG00000133454	-0.620867	0.00485389	0.0580029	10	6	myosin XVIIIB
BMP6	ENSG00000153162	0.205447	0.00485505	0.0580029	905	1202	bone morphogenetic protein 6
ELMO2	ENSG00000062598,ENSG00000062598	0.0818848	0.00485864	0.0580029	801	919	engulfment and cell motility 2
RGP1	ENSG00000107185	-0.14497	0.00486988	0.0580938	177	157	RGP1 retrograde golgi transport homolog (S. cerevisiae)
BRD2	ENSG00000204256,ENSG00000204256	0.0693878	0.00488881	0.0582763	4666	5262	bromodomain containing 2
MAPK1IP1L	ENSG00000168175	0.0637337	0.00490389	0.0584125	1581	1749	mitogen-activated protein kinase 1 interacting protein 1-like
GLIS1	ENSG00000174332	0.344369	0.00491113	0.0584438	23	34	GLIS family zinc finger 1
FCGRT	ENSG00000104870,ENSG00000104870	0.141729	0.00491382	0.0584438	9036	10848	Fc fragment of IgG, receptor, transporter, alpha
EHD2	ENSG00000024422	-0.111718	0.00492824	0.0585717	20924	19822	EH-domain containing 2
KLHL10	ENSG00000161594	-0.259819	0.00494185	0.0586832	12	10	kelch-like family member 10
TSHR	ENSG00000165409,ENSG00000165409,ENSG00000165409,ENSG00000165409	-0.432383	0.00494495	0.0586832	39	28	thyroid stimulating hormone receptor
PPAPDC3	ENSG00000160539	-0.168559	0.00497064	0.0589444	369	333	phosphatidic acid phosphatase type 2 domain containing 3
CDC42SE2	ENSG00000158985,ENSG00000158985	0.0974425	0.00498109	0.0590246	927	1045	CDC42 small effector 2
NOMO1	ENSG00000103512	-0.116854	0.00499547	0.0591512	2017	1894	NODAL modulator 1
MYH9	ENSG00000100345	0.0948095	0.0050106	0.0592865	24558	29212	myosin, heavy chain 9, non-muscle
RPL27A	ENSG00000166441	0.101591	0.00501466	0.0592908	12048	14071	ribosomal protein L27a
ATOX1	ENSG00000177556	-0.124644	0.00501887	0.0592968	1298	1234	antioxidant 1 copper chaperone
KIAA1324L	ENSG00000164659,ENSG00000164659	-0.108025	0.00503174	0.059405	1184	1114	KIAA1324-like
DGKH	ENSG00000102780,ENSG00000102780,ENSG00000102780,ENSG00000102780,ENSG00000102780	-0.403221	0.00505037	0.0595809	17	10	diacylglycerol kinase, eta
MFAP2	ENSG00000117122,ENSG00000117122,ENSG00000117122,ENSG00000117122	0.176534	0.00508072	0.0598949	463	557	microfibrillar-associated protein 2
MYLK-AS1	ENSG00000239523	0.261966	0.00508533	0.0599051	18	24	MYLK antisense RNA 1
PLSCR4	ENSG00000114698,ENSG00000114698,ENSG00000114698,ENSG00000114698,ENSG00000114698	0.107572	0.00509352	0.0599574	2720	3109	phospholipid scramblase 4
DDX23	ENSG00000174243	0.0508258	0.00510512	0.0599767	1438	1608	DEAD (Asp-Glu-Ala-Asp) box polypeptide 23
SUCLG1	ENSG00000163541	-0.104592	0.00510522	0.0599767	3440	3272	succinate-CoA ligase, alpha subunit
COPB2	ENSG00000184432	-0.0753453	0.00510639	0.0599767	2395	2307	coatomer protein complex, subunit beta 2 (beta prime)
SLC1A3	ENSG00000079215,ENSG00000079215	0.1604	0.00512171	0.0601012	1498	1832	solute carrier family 1 (glial high affinity glutamate transporter), member 3
CCDC158	ENSG00000163749	-0.283263	0.00512468	0.0601012	25	20	coiled-coil domain containing 158
BRD4	ENSG00000141867,ENSG00000141867	0.0681014	0.00512825	0.0601012	1002	1129	bromodomain containing 4
SCO1	ENSG00000133028	-0.075429	0.0051409	0.0602053	585	564	SCO1 cytochrome c oxidase assembly protein
LAIR1	ENSG00000167613,ENSG00000167613	-0.123258	0.00515686	0.0602372	2988	2709	leukocyte-associated immunoglobulin-like receptor 1
TRUB1	ENSG00000165832	-0.103409	0.00515755	0.0602372	491	450	TruB pseudouridine (psi) synthase homolog 1 (E. coli)
MMS19	ENSG00000155229	0.0545473	0.00515825	0.0602372	1307	1483	MMS19 nucleotide excision repair homolog (S. cerevisiae)
ACTR5	ENSG00000101442	0.114377	0.0051617	0.0602372	195	234	ARP5 actin-related protein 5 homolog (yeast)
ATAD3B	ENSG00000160072	0.140187	0.00516455	0.0602372	562	699	ATPase family, AAA domain containing 3B
MGC16121	ENSG00000223749	-0.257446	0.00516798	0.0602372	35	30	NA
SEMA4F	ENSG00000135622	0.097706	0.00516996	0.0602372	333	383	sema domain, immunoglobulin domain (Ig), transmembrane domain (TM) and short cytoplasmic domain, (semaphorin) 4F
MCART1	ENSG00000122696,ENSG00000122696	-0.140694	0.005175	0.0602521	536	484	NA
LONP2	ENSG00000102910	-0.117508	0.00518289	0.0602604	1251	1136	lon peptidase 2, peroxisomal
RPP21	ENSG00000241779,ENSG00000243009,ENSG00000239865,ENSG00000241370,ENSG00000239927,ENSG00000242726,ENSG00000241863	0.172851	0.00518325	0.0602604	321	404	ribonuclease P/MRP 21kDa subunit
NUDT21	ENSG00000167005	0.0869727	0.00518728	0.0602636	1736	1907	nudix (nucleoside diphosphate linked moiety X)-type motif 21
RXRG	ENSG00000143171,ENSG00000143171	0.201243	0.00520433	0.0604178	99	127	retinoid X receptor, gamma
SMC1A	ENSG00000072501	0.0700202	0.00522336	0.0605948	1189	1326	structural maintenance of chromosomes 1A
NXPH3	ENSG00000182575	-0.180349	0.00524835	0.0608406	242	209	neurexophilin 3
EEF2	ENSG00000167658	0.0761055	0.00525871	0.0609165	43160	48983	eukaryotic translation elongation factor 2
CMTM8	ENSG00000170293	0.133712	0.00526628	0.0609602	301	372	CKLF-like MARVEL transmembrane domain containing 8
COL12A1	ENSG00000111799,ENSG00000111799	-0.138057	0.00529915	0.0612963	9826	8730	collagen, type XII, alpha 1
SNX29	ENSG00000048471	0.084552	0.00531644	0.0614519	975	1101	sorting nexin 29
UQCRQ	ENSG00000164405	-0.0939099	0.00532319	0.0614855	2173	2121	ubiquinol-cytochrome c reductase, complex III subunit VII, 9.5kDa
TXNDC11	ENSG00000153066	0.0577578	0.00534921	0.0617225	1002	1108	thioredoxin domain containing 11
XRCC1	ENSG00000073050	0.0796127	0.00535141	0.0617225	546	624	X-ray repair complementing defective repair in Chinese hamster cells 1
FNDC8	ENSG00000073598	-0.310189	0.00536111	0.0617719	13	10	fibronectin type III domain containing 8
SRXN1	ENSG00000172070	-0.150235	0.00537094	0.0617719	762	687	sulfiredoxin 1
CYP2U1	ENSG00000155016	-0.10156	0.00537135	0.0617719	647	590	cytochrome P450, family 2, subfamily U, polypeptide 1
ULK4	ENSG00000168038	0.111616	0.00537164	0.0617719	151	177	unc-51-like kinase 4 (C. elegans)
CXCL10	ENSG00000169245	-0.463781	0.00537499	0.0617719	150	102	chemokine (C-X-C motif) ligand 10
ITGB1BP1	ENSG00000119185,ENSG00000119185	0.125863	0.00538208	0.061809	5648	6667	integrin beta 1 binding protein 1
LDOC1	ENSG00000182195	-0.162906	0.0053932	0.0618923	721	634	leucine zipper, down-regulated in cancer 1
ZNF582	ENSG00000018869	-0.113455	0.0054185	0.0621381	51	48	zinc finger protein 582
S100A12	ENSG00000163221	-0.815087	0.00543469	0.0622792	28	12	S100 calcium binding protein A12
JPH2	ENSG00000149596,ENSG00000149596	-0.365709	0.00544071	0.0622804	229	174	junctophilin 2
FLT4	ENSG00000037280,ENSG00000037280	0.165112	0.00544258	0.0622804	1080	1414	fms-related tyrosine kinase 4
DRD1	ENSG00000184845	-0.607787	0.00545055	0.0623271	37	19	dopamine receptor D1
PAFAH1B3	ENSG00000079462,ENSG00000079462	0.176238	0.00546148	0.0623632	84	104	platelet-activating factor acetylhydrolase 1b, catalytic subunit 3 (29kDa)
ITGA6	ENSG00000091409,ENSG00000091409	-0.131253	0.00546629	0.0623632	4217	3854	integrin, alpha 6
UBE4A	ENSG00000110344,ENSG00000110344	-0.0576803	0.00546673	0.0623632	1794	1730	ubiquitination factor E4A
LGALS3	ENSG00000131981,ENSG00000131981	0.118481	0.0054693	0.0623632	12268	14372	lectin, galactoside-binding, soluble, 3
UBQLN4	ENSG00000160803	0.0528197	0.00548179	0.0624612	864	965	ubiquilin 4
NAA16	ENSG00000172766,ENSG00000172766	0.124239	0.00549591	0.0625776	320	378	N(alpha)-acetyltransferase 16, NatA auxiliary subunit
OGFRL1	ENSG00000119900	-0.198065	0.00551219	0.0626905	716	586	opioid growth factor receptor-like 1
ZNF564	ENSG00000249709	0.124041	0.00551929	0.0626905	229	275	zinc finger protein 564
BAZ2B	ENSG00000123636	-0.0883294	0.0055205	0.0626905	732	676	bromodomain adjacent to zinc finger domain, 2B
PHF12	ENSG00000109118,ENSG00000109118	0.0872023	0.00552398	0.0626905	855	988	PHD finger protein 12
BOD1	ENSG00000145919,ENSG00000145919	0.0905359	0.00552881	0.0626905	961	1111	biorientation of chromosomes in cell division 1
ATP6V1D	ENSG00000100554	-0.100162	0.00552932	0.0626905	1179	1101	ATPase, H+ transporting, lysosomal 34kDa, V1 subunit D
HADHB	ENSG00000138029	0.0806918	0.00553497	0.06271	4294	4880	hydroxyacyl-CoA dehydrogenase/3-ketoacyl-CoA thiolase/enoyl-CoA hydratase (trifunctional protein), beta subunit
TBCA	ENSG00000171530	0.0645113	0.00554781	0.0627811	2073	2314	tubulin folding cofactor A
CYP3A5	ENSG00000106258,ENSG00000106258,ENSG00000106258,ENSG00000106258,ENSG00000106258,ENSG00000106258	-0.381503	0.00554909	0.0627811	71	57	cytochrome P450, family 3, subfamily A, polypeptide 5
DDX54	ENSG00000123064,ENSG00000123064	0.0633555	0.00556198	0.0628826	1095	1246	DEAD (Asp-Glu-Ala-Asp) box polypeptide 54
UGP2	ENSG00000169764,ENSG00000169764	-0.163444	0.00556914	0.0628988	12269	10741	UDP-glucose pyrophosphorylase 2
MRAP	ENSG00000170262,ENSG00000170262	-0.159029	0.00557128	0.0628988	1828	1655	melanocortin 2 receptor accessory protein
ARAF	ENSG00000078061,ENSG00000078061,ENSG00000078061	0.060298	0.00557684	0.0629173	1376	1564	v-raf murine sarcoma 3611 viral oncogene homolog
COL24A1	ENSG00000171502	-0.210334	0.00559791	0.063061	99	87	collagen, type XXIV, alpha 1
DYX1C1	ENSG00000256061,ENSG00000256061,ENSG00000256061	0.226803	0.00559874	0.063061	57	78	dyslexia susceptibility 1 candidate 1
HEATR4	ENSG00000187105,ENSG00000187105	-0.179165	0.00560139	0.063061	16	15	HEAT repeat containing 4
NBPF16	ENSG00000203827	0.103587	0.00562085	0.0632081	4663	5638	neuroblastoma breakpoint family, member 16
RTF1	ENSG00000137815	0.0652966	0.00562235	0.0632081	1074	1184	Rtf1, Paf1/RNA polymerase II complex component, homolog (S. cerevisiae)
MSMO1	ENSG00000052802,ENSG00000052802	-0.294228	0.00563032	0.0632081	696	557	methylsterol monooxygenase 1
TCP11L1	ENSG00000176148,ENSG00000176148	-0.102881	0.00563308	0.0632081	191	178	t-complex 11, testis-specific-like 1
FBN1	ENSG00000166147	-0.170286	0.0056342	0.0632081	10414	8900	fibrillin 1
CLVS1	ENSG00000177182	-0.240771	0.00563918	0.0632196	98	86	clavesin 1
MKRN1	ENSG00000133606,ENSG00000133606	0.0605269	0.00564819	0.0632764	1936	2153	makorin ring finger protein 1
C22orf32	ENSG00000183172	0.078907	0.00565575	0.0633168	828	948	NA
SLC37A4	ENSG00000262676,ENSG00000262676,ENSG00000262676,ENSG00000262676	0.084593	0.0056888	0.0636213	438	500	solute carrier family 37 (glucose-6-phosphate transporter), member 4
C11orf51	ENSG00000110200	-0.11352	0.00569091	0.0636213	424	407	NA
ST7L	ENSG00000007341,ENSG00000007341,ENSG00000007341,ENSG00000007341	-0.17759	0.00570089	0.0636885	385	348	suppression of tumorigenicity 7 like
THRB	ENSG00000151090,ENSG00000151090,ENSG00000151090,ENSG00000151090	0.13671	0.0057061	0.0637022	1072	1247	thyroid hormone receptor, beta
HNRNPL	ENSG00000104824,ENSG00000104824	0.0538277	0.00571185	0.0637219	3972	4438	heterogeneous nuclear ribonucleoprotein L
DAB2IP	ENSG00000136848,ENSG00000136848	-0.108099	0.00572513	0.0637698	2904	2789	DAB2 interacting protein
THOC2	ENSG00000125676	-0.082457	0.00572722	0.0637698	845	780	THO complex 2
OLFML2A	ENSG00000185585	-0.152293	0.00572881	0.0637698	1702	1624	olfactomedin-like 2A
ERH	ENSG00000100632	0.0581342	0.00573352	0.0637698	1884	2083	enhancer of rudimentary homolog (Drosophila)
RDH10	ENSG00000121039	0.117073	0.00573605	0.0637698	867	1018	retinol dehydrogenase 10 (all-trans)
ACO2	ENSG00000100412	-0.103097	0.00574378	0.0638114	3659	3516	aconitase 2, mitochondrial
AGL	ENSG00000162688,ENSG00000162688,ENSG00000162688,ENSG00000162688,ENSG00000162688,ENSG00000162688	-0.157738	0.00574826	0.0638169	1270	1084	amylo-alpha-1, 6-glucosidase, 4-alpha-glucanotransferase
HIVEP1	ENSG00000095951	0.13062	0.00575374	0.0638334	349	397	human immunodeficiency virus type I enhancer binding protein 1
NTNG2	ENSG00000196358	-0.248396	0.00575898	0.0638473	37	30	netrin G2
SMG1	ENSG00000157106	-0.0971931	0.00577377	0.0638963	3000	2706	smg-1 homolog, phosphatidylinositol 3-kinase-related kinase (C. elegans)
CEP97	ENSG00000182504	-0.23189	0.00577503	0.0638963	52	39	centrosomal protein 97kDa
APLP2	ENSG00000084234,ENSG00000084234,ENSG00000084234,ENSG00000084234,ENSG00000084234,ENSG00000084234	0.119398	0.00577538	0.0638963	15455	17846	amyloid beta (A4) precursor-like protein 2
SLC30A7	ENSG00000162695	-0.138532	0.00578435	0.0639249	710	639	solute carrier family 30 (zinc transporter), member 7
CECR5-AS1	ENSG00000185837,ENSG00000185837	-0.285266	0.00578594	0.0639249	36	30	CECR5 antisense RNA 1
GOLGB1	ENSG00000173230,ENSG00000173230,ENSG00000173230,ENSG00000173230	-0.0699381	0.00579514	0.0639824	2839	2732	golgin B1
TBC1D5	ENSG00000131374,ENSG00000131374	0.0886032	0.00580435	0.0640399	1650	1863	TBC1 domain family, member 5
MTRNR2L1	ENSG00000256618	-0.162816	0.00582271	0.0641188	8398	7799	MT-RNR2-like 1
DUS2L	ENSG00000167264	-0.115423	0.00582713	0.0641188	216	206	dihydrouridine synthase 2-like
OXCT1	ENSG00000083720	-0.151186	0.00583172	0.0641188	2489	2217	3-oxoacid CoA transferase 1
IL11RA	ENSG00000137070,ENSG00000137070	0.122265	0.00583297	0.0641188	976	1190	interleukin 11 receptor, alpha
HECW1	ENSG00000002746	-0.34922	0.00583543	0.0641188	12	9	HECT, C2 and WW domain containing E3 ubiquitin protein ligase 1
KIAA1967	ENSG00000158941	0.0419438	0.00583554	0.0641188	1742	1966	KIAA1967
MAST4	ENSG00000069020,ENSG00000069020,ENSG00000069020	-0.127236	0.00583968	0.0641203	2323	2101	microtubule associated serine/threonine kinase family member 4
VRK1	ENSG00000100749	0.0883046	0.00585626	0.0642488	173	199	vaccinia related kinase 1
ODC1	ENSG00000115758	-0.106621	0.00585941	0.0642488	1131	1072	ornithine decarboxylase 1
SLAIN1	ENSG00000139737,ENSG00000139737,ENSG00000139737,ENSG00000139737,ENSG00000139737	0.186429	0.00587674	0.0643947	20	22	SLAIN motif family, member 1
PWWP2A	ENSG00000170234,ENSG00000170234	0.109844	0.00588137	0.0644014	434	510	PWWP domain containing 2A
DNMT3B	ENSG00000088305,ENSG00000088305,ENSG00000088305,ENSG00000088305,ENSG00000088305,ENSG00000088305	-0.128022	0.00592157	0.0647847	98	95	DNA (cytosine-5-)-methyltransferase 3 beta
LOC100506334	ENSG00000237945	-0.229079	0.00592447	0.0647847	76	62	NA
NAF1	ENSG00000145414,ENSG00000145414	-0.112504	0.00593433	0.0648145	235	216	nuclear assembly factor 1 ribonucleoprotein
LAMA2	ENSG00000196569,ENSG00000196569	-0.185767	0.00593853	0.0648145	1611	1375	laminin, alpha 2
CTBS	ENSG00000117151	0.0898853	0.00593934	0.0648145	549	607	chitobiase, di-N-acetyl-
EMILIN1	ENSG00000138080	0.174049	0.00595288	0.0648742	1736	2158	elastin microfibril interfacer 1
COCH	ENSG00000100473,ENSG00000100473	0.207595	0.00595292	0.0648742	121	150	cochlin
PRADC1	ENSG00000135617	-0.0946123	0.00598041	0.0650742	834	804	protease-associated domain containing 1
SRGAP3	ENSG00000196220,ENSG00000196220	0.2	0.00598414	0.0650742	85	107	SLIT-ROBO Rho GTPase activating protein 3
ARHGAP24	ENSG00000138639,ENSG00000138639,ENSG00000138639	0.0942323	0.00598934	0.0650742	871	979	Rho GTPase activating protein 24
COX7A1	ENSG00000161281	-0.142766	0.00599169	0.0650742	2936	2757	cytochrome c oxidase subunit VIIa polypeptide 1 (muscle)
CTCF	ENSG00000102974,ENSG00000102974	0.0635697	0.00599208	0.0650742	892	998	CCCTC-binding factor (zinc finger protein)
PFN1P2	ENSG00000268094	-0.291202	0.00599565	0.0650742	153	112	profilin 1 pseudogene 2
CLTCL1	ENSG00000070371,ENSG00000070371	-0.127831	0.00600445	0.0651173	278	264	clathrin, heavy chain-like 1
ENSA	ENSG00000143420,ENSG00000143420,ENSG00000143420,ENSG00000143420,ENSG00000143420,ENSG00000143420,ENSG00000143420,ENSG00000143420	0.0613503	0.00600776	0.0651173	3198	3547	endosulfine alpha
TCP1	ENSG00000120438,ENSG00000120438	0.0780006	0.00602296	0.0652379	3219	3617	t-complex 1
RUNX1	ENSG00000159216,ENSG00000159216,ENSG00000159216	0.144576	0.00603267	0.0652988	819	972	runt-related transcription factor 1
ZCCHC14	ENSG00000140948	0.0802702	0.00604019	0.0653361	1009	1122	zinc finger, CCHC domain containing 14
SRSF5	ENSG00000100650,ENSG00000100650	0.0933957	0.0060466	0.0653613	7626	8860	serine/arginine-rich splicing factor 5
SOLH	ENSG00000103326	0.115728	0.00605736	0.0654334	923	1113	small optic lobes homolog (Drosophila)
SNRPA	ENSG00000077312	0.0875851	0.0060713	0.0655201	1285	1480	small nuclear ribonucleoprotein polypeptide A
TSGA10	ENSG00000135951,ENSG00000135951	-0.292274	0.00607357	0.0655201	132	106	testis specific, 10
NRP2	ENSG00000118257,ENSG00000118257,ENSG00000118257,ENSG00000118257,ENSG00000118257,ENSG00000118257	-0.150412	0.00608827	0.0656345	2497	2215	neuropilin 2
TNFSF12	ENSG00000239697	0.106418	0.00610247	0.0657432	2276	2636	tumor necrosis factor (ligand) superfamily, member 12
ENOPH1	ENSG00000145293	0.0582991	0.00611075	0.0657881	687	746	enolase-phosphatase 1
PTPN18	ENSG00000072135,ENSG00000072135	0.0986911	0.00611953	0.0658384	2008	2384	protein tyrosine phosphatase, non-receptor type 18 (brain-derived)
PCDHGA4	ENSG00000262576,ENSG00000262576	-0.198805	0.00613207	0.0659291	107	90	protocadherin gamma subfamily A, 4
LONP1	ENSG00000196365	-0.0962474	0.00613696	0.0659373	2164	2133	lon peptidase 1, mitochondrial
AXIN1	ENSG00000103126,ENSG00000103126	0.0689266	0.00614498	0.0659644	669	757	axin 1
SDK1	ENSG00000146555	0.169228	0.00614878	0.0659644	356	423	sidekick cell adhesion molecule 1
NRCAM	ENSG00000091129,ENSG00000091129,ENSG00000091129,ENSG00000091129	-0.250597	0.00615998	0.0659644	1027	844	neuronal cell adhesion molecule
PPM1E	ENSG00000175175	-0.420528	0.00616472	0.0659644	25	17	protein phosphatase, Mg2+/Mn2+ dependent, 1E
RAC1	ENSG00000136238,ENSG00000136238	0.0612876	0.00616659	0.0659644	7208	7968	ras-related C3 botulinum toxin substrate 1 (rho family, small GTP binding protein Rac1)
TMPO	ENSG00000120802,ENSG00000120802,ENSG00000120802	0.0961992	0.00616934	0.0659644	884	967	thymopoietin
CASC4	ENSG00000166734,ENSG00000166734	0.076538	0.00616988	0.0659644	2574	2821	cancer susceptibility candidate 4
TG	ENSG00000042832	-0.389036	0.00617245	0.0659644	15	11	thyroglobulin
POMGNT1	ENSG00000085998,ENSG00000085998	0.050601	0.00618898	0.066089	1318	1492	protein O-linked mannose beta1,2-N-acetylglucosaminyltransferase
TK2	ENSG00000166548,ENSG00000166548,ENSG00000166548,ENSG00000166548	-0.0962142	0.00619381	0.066089	3332	3190	thymidine kinase 2, mitochondrial
FAM70A	ENSG00000125355,ENSG00000125355,ENSG00000125355	0.465749	0.00619649	0.066089	32	47	NA
ZRANB3	ENSG00000121988	-0.160759	0.00622182	0.0662889	60	53	zinc finger, RAN-binding domain containing 3
MYO1B	ENSG00000128641,ENSG00000128641,ENSG00000128641	-0.0878812	0.00622351	0.0662889	2960	2873	myosin IB
HBB	ENSG00000244734	-1.15033	0.00624047	0.0664253	43868	21868	hemoglobin, beta
RGN	ENSG00000130988,ENSG00000130988	-0.155428	0.00625349	0.0665197	465	422	regucalcin
EEF1G	ENSG00000254772	0.0751407	0.00626643	0.0666013	20803	23675	eukaryotic translation elongation factor 1 gamma
RNF145	ENSG00000145860,ENSG00000145860,ENSG00000145860,ENSG00000145860,ENSG00000145860	0.0708045	0.00627359	0.0666013	1685	1862	ring finger protein 145
MAP4	ENSG00000047849,ENSG00000047849,ENSG00000047849	-0.104095	0.00627364	0.0666013	13309	12655	microtubule-associated protein 4
FAM118B	ENSG00000197798	-0.103847	0.00628435	0.0666708	366	346	family with sequence similarity 118, member B
IGBP1	ENSG00000089289	0.0835873	0.00628957	0.066682	1278	1444	immunoglobulin (CD79A) binding protein 1
PI4K2B	ENSG00000038210	0.118716	0.00629664	0.0667113	403	457	phosphatidylinositol 4-kinase type 2 beta
SLC25A6	ENSG00000169100	0.08551	0.00630089	0.0667113	11260	12862	solute carrier family 25 (mitochondrial carrier; adenine nucleotide translocator), member 6
TNNC1	ENSG00000114854	-0.315132	0.00631205	0.0667113	13	10	troponin C type 1 (slow)
MSTO2P	NA	0.194445	0.00631305	0.0667113	123	175	misato homolog 2 pseudogene
CNTN1	ENSG00000018236,ENSG00000018236,ENSG00000018236,ENSG00000018236	-0.275247	0.00631317	0.0667113	171	126	contactin 1
NOMO2	ENSG00000185164,ENSG00000185164	-0.083579	0.00633656	0.0668822	2419	2347	NODAL modulator 2
TXNIP	ENSG00000117289	0.183027	0.00633771	0.0668822	56404	70300	thioredoxin interacting protein
AFF2	ENSG00000155966,ENSG00000269754,ENSG00000155966,ENSG00000155966,ENSG00000269754,ENSG00000155966,ENSG00000269754,ENSG00000155966,ENSG00000155966	-0.402079	0.0063552	0.0669646	326	234	AF4/FMR2 family, member 2
GALNT11	ENSG00000178234	0.0519785	0.00636167	0.0669646	1447	1585	UDP-N-acetyl-alpha-D-galactosamine:polypeptide N-acetylgalactosaminyltransferase 11 (GalNAc-T11)
SMEK1	ENSG00000100796	0.0543447	0.00636652	0.0669646	1333	1465	SMEK homolog 1, suppressor of mek1 (Dictyostelium)
RBM22	ENSG00000086589	0.0418729	0.00637529	0.0669646	886	981	RNA binding motif protein 22
TADA2A	ENSG00000108264,ENSG00000108264,ENSG00000108264	0.107825	0.00637538	0.0669646	146	169	transcriptional adaptor 2A
ADAR	ENSG00000160710,ENSG00000160710,ENSG00000160710	0.0613196	0.00637633	0.0669646	3888	4323	adenosine deaminase, RNA-specific
MYEOV	ENSG00000172927	-0.316379	0.00637893	0.0669646	637	527	myeloma overexpressed
C1orf35	ENSG00000143793	0.101815	0.00638129	0.0669646	425	504	chromosome 1 open reading frame 35
NETO1	ENSG00000166342,ENSG00000166342	-0.404986	0.00638316	0.0669646	33	24	neuropilin (NRP) and tolloid (TLL)-like 1
MBOAT2	ENSG00000143797	-0.164069	0.00638755	0.0669668	179	158	membrane bound O-acyltransferase domain containing 2
STBD1	ENSG00000118804	-0.113651	0.00640438	0.0670993	3294	3007	starch binding domain 1
DYNC2LI1	ENSG00000138036,ENSG00000138036,ENSG00000138036	-0.0797303	0.00640952	0.0671092	549	535	dynein, cytoplasmic 2, light intermediate chain 1
HAAO	ENSG00000162882	0.223489	0.00641981	0.0671576	220	289	3-hydroxyanthranilate 3,4-dioxygenase
ARIH1	ENSG00000166233	0.048779	0.00642253	0.0671576	1733	1877	ariadne homolog, ubiquitin-conjugating enzyme E2 binding protein, 1 (Drosophila)
NDUFB2	ENSG00000090266	-0.100295	0.00645527	0.0674265	2699	2627	NADH dehydrogenase (ubiquinone) 1 beta subcomplex, 2, 8kDa
TMEM179B	ENSG00000185475	0.053349	0.00645684	0.0674265	926	1027	transmembrane protein 179B
MGP	ENSG00000111341,ENSG00000111341	-0.139848	0.00646088	0.0674265	10816	9992	matrix Gla protein
NSRP1	ENSG00000126653	0.0715343	0.00647366	0.0675159	652	743	nuclear speckle splicing regulatory protein 1
CYP11A1	ENSG00000140459,ENSG00000140459	-0.247612	0.00651287	0.0677948	162	132	cytochrome P450, family 11, subfamily A, polypeptide 1
CDRT1	ENSG00000241322	-0.298067	0.00652076	0.0677948	34	28	CMT1A duplicated region transcript 1
DDX18	ENSG00000088205	0.0781295	0.00652076	0.0677948	1173	1304	DEAD (Asp-Glu-Ala-Asp) box polypeptide 18
CPA4	ENSG00000128510,ENSG00000128510	-0.677981	0.00652192	0.0677948	106	70	carboxypeptidase A4
APPL2	ENSG00000136044,ENSG00000136044,ENSG00000136044	0.0768386	0.00652394	0.0677948	1095	1241	adaptor protein, phosphotyrosine interaction, PH domain and leucine zipper containing 2
C17orf76-AS1	ENSG00000175061,ENSG00000175061,ENSG00000175061,ENSG00000175061,ENSG00000175061,ENSG00000175061,ENSG00000175061,ENSG00000175061,ENSG00000175061,ENSG00000175061,ENSG00000175061,ENSG00000175061,ENSG00000175061,ENSG00000175061,ENSG00000175061,ENSG00000175061,ENSG00000175061,ENSG00000175061,ENSG00000175061	0.0862658	0.00652826	0.0677948	9387	10805	C17orf76 antisense RNA 1
ACOT8	ENSG00000101473	-0.107363	0.00653005	0.0677948	285	280	acyl-CoA thioesterase 8
COQ10B	ENSG00000115520	0.105051	0.00653584	0.0678109	662	748	coenzyme Q10 homolog B (S. cerevisiae)
PFKP	ENSG00000067057,ENSG00000067057	0.122492	0.0065521	0.0679146	721	878	phosphofructokinase, platelet
STARD4	ENSG00000164211	-0.278513	0.00655942	0.0679146	58	42	StAR-related lipid transfer (START) domain containing 4
EGFLAM	ENSG00000164318,ENSG00000164318,ENSG00000164318	0.117591	0.00656337	0.0679146	602	733	EGF-like, fibronectin type III and laminin G domains
NTRK2	ENSG00000148053,ENSG00000148053,ENSG00000148053,ENSG00000148053,ENSG00000148053	-0.170776	0.00656493	0.0679146	8885	7674	neurotrophic tyrosine kinase, receptor, type 2
EID1	ENSG00000255302	0.0504325	0.00656704	0.0679146	5182	5612	EP300 interacting inhibitor of differentiation 1
FBXW10	ENSG00000171931	-0.575363	0.00659485	0.0681582	16	10	F-box and WD repeat domain containing 10
PAXIP1	ENSG00000157212	0.0904775	0.00661771	0.0682837	258	296	PAX interacting (with transcription-activation domain) protein 1
GNAS	ENSG00000087460,ENSG00000087460,ENSG00000087460,ENSG00000087460,ENSG00000087460,ENSG00000087460,ENSG00000087460,ENSG00000087460	0.0831514	0.00661992	0.0682837	24930	28117	GNAS complex locus
SMPDL3A	ENSG00000172594	0.166619	0.00662221	0.0682837	266	314	sphingomyelin phosphodiesterase, acid-like 3A
SFPQ	ENSG00000116560	0.0997328	0.00662406	0.0682837	2338	2659	splicing factor proline/glutamine-rich
LDLR	ENSG00000130164,ENSG00000130164,ENSG00000130164,ENSG00000130164,ENSG00000130164,ENSG00000130164	-0.284593	0.00665381	0.0685023	687	573	low density lipoprotein receptor
EFCAB2	ENSG00000203666,ENSG00000203666,ENSG00000203666,ENSG00000203666	0.109765	0.00665743	0.0685023	280	325	EF-hand calcium binding domain 2
C4orf32	ENSG00000174749	0.117671	0.0066581	0.0685023	2794	3294	chromosome 4 open reading frame 32
DIRC1	ENSG00000174325	-0.389093	0.00666265	0.068505	14	10	disrupted in renal carcinoma 1
PCSK5	ENSG00000099139,ENSG00000099139	-0.139565	0.00667946	0.0686294	370	325	proprotein convertase subtilisin/kexin type 5
DAAM1	ENSG00000100592	-0.16881	0.00668332	0.0686294	872	732	dishevelled associated activator of morphogenesis 1
SLC16A14	ENSG00000163053	-0.110533	0.00669371	0.0686735	308	288	solute carrier family 16, member 14 (monocarboxylic acid transporter 14)
ZEB2-AS1	ENSG00000238057	-0.291762	0.00670381	0.0686735	28	23	ZEB2 antisense RNA 1
TPM4	ENSG00000167460	0.138354	0.00670798	0.0686735	8013	9640	tropomyosin 4
KHSRP	ENSG00000088247	0.0619315	0.00670895	0.0686735	2140	2370	KH-type splicing regulatory protein
ADORA1	ENSG00000163485,ENSG00000163485	-0.260745	0.00670906	0.0686735	392	321	adenosine A1 receptor
FPR2	ENSG00000171049,ENSG00000171049	-0.849372	0.00671745	0.0687154	17	7	formyl peptide receptor 2
PTPN23	ENSG00000076201	0.061556	0.00675292	0.0690342	1452	1633	protein tyrosine phosphatase, non-receptor type 23
AASS	ENSG00000008311	0.16249	0.00676109	0.0690736	996	1238	aminoadipate-semialdehyde synthase
REXO2	ENSG00000076043	-0.0808992	0.00678173	0.0692275	1253	1217	RNA exonuclease 2
TTC31	ENSG00000115282	0.0837818	0.00678633	0.0692275	728	849	tetratricopeptide repeat domain 31
C1orf27	ENSG00000157181,ENSG00000157181,ENSG00000157181	-0.0614063	0.00678913	0.0692275	762	743	chromosome 1 open reading frame 27
RNF114	ENSG00000124226	0.0549157	0.00681557	0.0694529	1376	1517	ring finger protein 114
TPST2	ENSG00000128294,ENSG00000128294	-0.13708	0.00683272	0.0695696	2005	1838	tyrosylprotein sulfotransferase 2
MMEL1	ENSG00000142606	0.308516	0.00683572	0.0695696	20	30	membrane metallo-endopeptidase-like 1
SNX2	ENSG00000205302	0.0828149	0.00684613	0.0696043	1690	1879	sorting nexin 2
COL4A4	ENSG00000081052	-0.424098	0.00684986	0.0696043	129	87	collagen, type IV, alpha 4
ING3	ENSG00000071243,ENSG00000071243	0.0721152	0.0068541	0.0696043	317	358	inhibitor of growth family, member 3
FLVCR1-AS1	ENSG00000198468,ENSG00000198468	-0.19818	0.00685772	0.0696043	33	28	FLVCR1 antisense RNA 1 (head to head)
MAP7D3	ENSG00000129680,ENSG00000129680,ENSG00000129680	0.102651	0.00686086	0.0696043	1116	1304	MAP7 domain containing 3
TMEM132B	ENSG00000139364	-0.409978	0.0068784	0.069738	15	10	transmembrane protein 132B
L3MBTL4	ENSG00000154655	0.137714	0.00689817	0.0698525	136	162	l(3)mbt-like 4 (Drosophila)
FBLN5	ENSG00000140092	-0.129002	0.00689842	0.0698525	3204	2932	fibulin 5
NUP85	ENSG00000125450	0.0615324	0.0069085	0.0699104	795	907	nucleoporin 85kDa
LPCAT2	ENSG00000087253	0.095486	0.00692945	0.0700781	791	866	lysophosphatidylcholine acyltransferase 2
C10orf26	ENSG00000166272,ENSG00000166272	-0.0777885	0.00695782	0.070282	2560	2486	NA
CBLL1	ENSG00000105879	0.0861338	0.0069584	0.070282	530	593	Cbl proto-oncogene, E3 ubiquitin protein ligase-like 1
HCN2	ENSG00000099822	-0.32871	0.00696808	0.0703354	13	11	hyperpolarization activated cyclic nucleotide-gated potassium channel 2
KLHL23	ENSG00000213160	-0.3832	0.00698621	0.0704635	218	154	kelch-like family member 23
PSMC6	ENSG00000100519	-0.0576904	0.00699308	0.0704635	1620	1598	proteasome (prosome, macropain) 26S subunit, ATPase, 6
HNRPDL	ENSG00000152795	0.0906372	0.00699397	0.0704635	4830	5587	NA
COBLL1	ENSG00000082438	-0.176117	0.00701544	0.0706208	4206	3553	cordon-bleu WH2 repeat protein-like 1
GPN1	ENSG00000198522,ENSG00000198522,ENSG00000198522,ENSG00000198522	0.0507762	0.00702187	0.0706208	642	709	GPN-loop GTPase 1
TNMD	ENSG00000000005	-0.286446	0.00702282	0.0706208	3096	2330	tenomodulin
SETD3	ENSG00000183576,ENSG00000183576	0.0767167	0.00702853	0.0706338	2192	2453	SET domain containing 3
TSFM	ENSG00000123297,ENSG00000123297,ENSG00000123297,ENSG00000123297	-0.0850807	0.00703587	0.0706628	564	549	Ts translation elongation factor, mitochondrial
SCRIB	ENSG00000180900,ENSG00000180900	0.07754	0.00704141	0.0706628	1546	1803	scribbled planar cell polarity protein
ELOVL1	ENSG00000066322,ENSG00000066322,ENSG00000066322,ENSG00000066322	-0.0659652	0.00704465	0.0706628	2999	2965	ELOVL fatty acid elongase 1
CCNG1	ENSG00000113328,ENSG00000113328	0.0962188	0.00708084	0.0709813	2207	2485	cyclin G1
GLI3	ENSG00000106571	0.135309	0.00708678	0.0709965	437	520	GLI family zinc finger 3
FBRS	ENSG00000156860	0.0725783	0.00709363	0.0710205	1332	1527	fibrosin
SH3BP5L	ENSG00000175137	-0.082184	0.00710881	0.0711281	878	863	SH3-binding domain protein 5-like
WHSC2	ENSG00000185049	0.0933386	0.00712137	0.0712093	623	730	NA
SDHAF2	ENSG00000167985	-0.0784244	0.00713621	0.0713131	705	686	succinate dehydrogenase complex assembly factor 2
ESD	ENSG00000139684	0.0582722	0.00714616	0.071368	2645	2918	esterase D
PFKFB3	ENSG00000170525,ENSG00000170525	0.207407	0.00715655	0.0713957	15600	19781	6-phosphofructo-2-kinase/fructose-2,6-biphosphatase 3
RHOBTB1	ENSG00000072422,ENSG00000072422,ENSG00000072422	0.147904	0.00716409	0.0713957	824	1008	Rho-related BTB domain containing 1
FGF11	ENSG00000161958	-0.163231	0.00716417	0.0713957	201	184	fibroblast growth factor 11
NEXN	ENSG00000162614,ENSG00000162614	-0.157905	0.00716677	0.0713957	941	844	nexilin (F actin binding protein)
ITGA2	ENSG00000164171	-0.203469	0.00717252	0.0714085	96	81	integrin, alpha 2 (CD49B, alpha 2 subunit of VLA-2 receptor)
ZNF136	ENSG00000196646	0.119934	0.00719476	0.0715438	181	211	zinc finger protein 136
EXOSC10	ENSG00000171824,ENSG00000171824	0.0569399	0.00719505	0.0715438	1332	1513	exosome component 10
CISD2	ENSG00000145354	0.129034	0.00720051	0.0715537	426	496	CDGSH iron sulfur domain 2
ATF4	ENSG00000128272,ENSG00000128272	0.0703167	0.00721219	0.0715888	10801	12295	activating transcription factor 4
SYNPO	ENSG00000171992,ENSG00000171992,ENSG00000171992,ENSG00000171992	-0.144535	0.00721299	0.0715888	13029	11712	synaptopodin
SUMO2	ENSG00000188612,ENSG00000188612	0.0440844	0.00723299	0.0717428	4242	4600	small ubiquitin-like modifier 2
TMEM8B	ENSG00000137103,ENSG00000137103,ENSG00000137103	0.101619	0.00724571	0.0718231	534	629	transmembrane protein 8B
ACBD4	ENSG00000181513,ENSG00000181513,ENSG00000181513,ENSG00000181513	-0.148669	0.00725114	0.0718231	1052	953	acyl-CoA binding domain containing 4
CHDH	ENSG00000016391	0.291855	0.00725454	0.0718231	23	33	choline dehydrogenase
GMPS	ENSG00000163655	0.0708467	0.00727969	0.0720275	480	531	guanine monphosphate synthase
LPGAT1	ENSG00000123684	-0.125	0.00729024	0.0720874	4583	4092	lysophosphatidylglycerol acyltransferase 1
PTRHD1	ENSG00000184924	-0.105724	0.00731541	0.0722916	438	415	peptidyl-tRNA hydrolase domain containing 1
COX11	ENSG00000166260,ENSG00000166260,ENSG00000166260	0.091671	0.00733684	0.0724586	748	847	cytochrome c oxidase assembly homolog 11 (yeast)
MUC4	ENSG00000145113,ENSG00000145113,ENSG00000145113	0.322309	0.00735483	0.0725915	15	22	mucin 4, cell surface associated
UST	ENSG00000111962	0.125289	0.0073711	0.0727073	303	350	uronyl-2-sulfotransferase
HPRT1	ENSG00000165704	0.133007	0.00739099	0.0728535	331	389	hypoxanthine phosphoribosyltransferase 1
HMBS	ENSG00000256269,ENSG00000261883,ENSG00000256269	-0.148477	0.00739502	0.0728535	367	339	hydroxymethylbilane synthase
RBM23	ENSG00000100461,ENSG00000100461,ENSG00000100461	0.0567441	0.00740746	0.0729311	801	899	RNA binding motif protein 23
FASTKD1	ENSG00000138399	-0.117834	0.00742258	0.0730351	333	311	FAST kinase domains 1
GATAD2A	ENSG00000167491	0.0527414	0.00742998	0.073063	1372	1528	GATA zinc finger domain containing 2A
C1orf216	ENSG00000142686	-0.0522036	0.0074405	0.0731091	594	597	chromosome 1 open reading frame 216
ARF4	ENSG00000168374	-0.097703	0.0074438	0.0731091	5403	5101	ADP-ribosylation factor 4
SLC3A2	ENSG00000168003,ENSG00000168003,ENSG00000168003,ENSG00000168003	0.106433	0.00745558	0.0731752	2276	2647	solute carrier family 3 (activators of dibasic and neutral amino acid transport), member 2
HARBI1	ENSG00000180423	-0.190869	0.00746786	0.0731752	58	50	harbinger transposase derived 1
CRTC2	ENSG00000160741	0.086817	0.00746866	0.0731752	1185	1400	CREB regulated transcription coactivator 2
LOC158376	ENSG00000235387	0.120746	0.00746881	0.0731752	295	365	NA
HNRNPF	ENSG00000169813,ENSG00000169813,ENSG00000169813,ENSG00000169813,ENSG00000169813,ENSG00000169813	0.0756351	0.00747387	0.07318	2564	2877	heterogeneous nuclear ribonucleoprotein F
LRP1	ENSG00000123384	-0.0974855	0.00748708	0.0732644	54423	51239	low density lipoprotein receptor-related protein 1
G6PC3	ENSG00000141349	-0.0730416	0.00749876	0.0733339	1660	1641	glucose 6 phosphatase, catalytic, 3
MACROD1	ENSG00000133315	0.180818	0.00751783	0.0734649	387	496	MACRO domain containing 1
TAF13	ENSG00000197780	-0.183309	0.00752133	0.0734649	230	200	TAF13 RNA polymerase II, TATA box binding protein (TBP)-associated factor, 18kDa
CDCA7L	ENSG00000164649,ENSG00000164649,ENSG00000164649	0.189005	0.00753004	0.0735003	148	178	cell division cycle associated 7-like
APOE	ENSG00000130203	0.39751	0.00753414	0.0735003	16908	24572	apolipoprotein E
CCT4	ENSG00000115484,ENSG00000115484	0.0736714	0.00754559	0.0735287	2349	2651	chaperonin containing TCP1, subunit 4 (delta)
IL1RAP	ENSG00000196083,ENSG00000196083,ENSG00000196083,ENSG00000196083,ENSG00000196083,ENSG00000196083	0.10744	0.00754623	0.0735287	125	141	interleukin 1 receptor accessory protein
CLASP2	ENSG00000163539,ENSG00000163539	-0.0716841	0.00755839	0.0736024	1094	1039	cytoplasmic linker associated protein 2
FATE1	ENSG00000147378	-0.437134	0.00756531	0.0736037	10	8	fetal and adult testis expressed 1
TAP2	ENSG00000250264,ENSG00000204267,ENSG00000237599,ENSG00000206299,ENSG00000225967,ENSG00000228582,ENSG00000232326,ENSG00000223481,ENSG00000206235	0.0854198	0.00756772	0.0736037	1697	1951	transporter 2, ATP-binding cassette, sub-family B (MDR/TAP)
MALAT1	ENSG00000251562	-0.251391	0.00757716	0.0736508	11989	10147	metastasis associated lung adenocarcinoma transcript 1 (non-protein coding)
PCSK7	ENSG00000160613	0.092891	0.00758521	0.0736842	1450	1731	proprotein convertase subtilisin/kexin type 7
PREPL	ENSG00000138078,ENSG00000138078,ENSG00000138078,ENSG00000138078,ENSG00000138078,ENSG00000138078,ENSG00000138078	-0.10823	0.00760187	0.073801	1712	1561	prolyl endopeptidase-like
PROK2	ENSG00000163421,ENSG00000163421	-0.562669	0.0076067	0.073801	18	10	prokineticin 2
LOXL4	ENSG00000138131	-0.16358	0.00761106	0.073801	581	537	lysyl oxidase-like 4
PNLDC1	ENSG00000146453	-0.741664	0.00763221	0.0739612	14	8	poly(A)-specific ribonuclease (PARN)-like domain containing 1
FBXW7	ENSG00000109670,ENSG00000109670,ENSG00000109670	-0.0976353	0.00765315	0.0741194	774	720	F-box and WD repeat domain containing 7, E3 ubiquitin protein ligase
HEYL	ENSG00000163909	-0.233678	0.00770026	0.0744858	306	268	hairy/enhancer-of-split related with YRPW motif-like
SRRM1	ENSG00000133226	0.0671816	0.0077003	0.0744858	2018	2291	serine/arginine repetitive matrix 1
CHAF1A	ENSG00000167670	-0.0898469	0.00771152	0.0745493	390	380	chromatin assembly factor 1, subunit A (p150)
SF3B4	ENSG00000143368	0.0656047	0.00773655	0.0746647	1076	1200	splicing factor 3b, subunit 4, 49kDa
RIMS2	ENSG00000176406,ENSG00000176406	-0.595919	0.00773956	0.0746647	20	10	regulating synaptic membrane exocytosis 2
FOXS1	ENSG00000179772	-0.238421	0.00774308	0.0746647	177	156	forkhead box S1
FARP1	ENSG00000152767,ENSG00000152767	0.0978901	0.00774328	0.0746647	1205	1401	FERM, RhoGEF (ARHGEF) and pleckstrin domain protein 1 (chondrocyte-derived)
TBC1D25	ENSG00000068354	0.0514315	0.00775601	0.0746647	463	514	TBC1 domain family, member 25
LOC92249	NA	0.105978	0.00775672	0.0746647	330	387	NA
CHST3	ENSG00000122863	0.155655	0.00775815	0.0746647	1432	1754	carbohydrate (chondroitin 6) sulfotransferase 3
CRYM	ENSG00000103316,ENSG00000103316	0.377332	0.00776076	0.0746647	7	10	crystallin, mu
FAM106A	ENSG00000205217	-0.393159	0.00776618	0.0746719	25	17	family with sequence similarity 106, member A
CDK4	ENSG00000135446	0.0688366	0.00777297	0.0746829	1545	1743	cyclin-dependent kinase 4
AZGP1P1	ENSG00000214313	0.504449	0.00777665	0.0746829	7	12	alpha-2-glycoprotein 1, zinc-binding pseudogene 1
SAP30	ENSG00000164105	0.144757	0.00778762	0.0747211	120	143	Sin3A-associated protein, 30kDa
ST3GAL4	ENSG00000110080,ENSG00000110080,ENSG00000110080,ENSG00000110080	0.0782081	0.00778996	0.0747211	587	667	ST3 beta-galactoside alpha-2,3-sialyltransferase 4
FAM120A	ENSG00000048828	0.0516987	0.00780278	0.0747992	3792	4127	family with sequence similarity 120A
DCTN1	ENSG00000204843,ENSG00000204843,ENSG00000204843,ENSG00000204843,ENSG00000204843,ENSG00000204843	0.0638875	0.00781545	0.0748759	3415	3882	dynactin 1
PIF1	ENSG00000140451	-0.193205	0.00782883	0.0749592	54	48	PIF1 5'-to-3' DNA helicase
VGLL4	ENSG00000144560,ENSG00000144560,ENSG00000144560,ENSG00000144560	-0.0747992	0.00784028	0.0750239	1452	1430	vestigial like 4 (Drosophila)
KDM4A	ENSG00000066135	-0.0513871	0.0078519	0.0750903	847	848	lysine (K)-specific demethylase 4A
BST1	ENSG00000109743	-0.130118	0.0078686	0.0752051	545	498	bone marrow stromal cell antigen 1
GPX3	ENSG00000211445	0.30653	0.00787973	0.0752664	27070	38850	glutathione peroxidase 3 (plasma)
MRO	ENSG00000134042,ENSG00000134042,ENSG00000134042,ENSG00000134042	-0.160519	0.00788662	0.0752874	237	212	maestro
LOC100287042	ENSG00000263843	0.231175	0.00792376	0.0755968	37	50	NA
TMEM106C	ENSG00000134291,ENSG00000134291,ENSG00000134291,ENSG00000134291	0.082366	0.00794042	0.0757107	446	510	transmembrane protein 106C
RCE1	ENSG00000173653,ENSG00000173653	0.100223	0.00795488	0.0757639	330	395	RCE1 homolog, prenyl protein protease (S. cerevisiae)
MPHOSPH9	ENSG00000051825	-0.118532	0.00795547	0.0757639	139	123	M-phase phosphoprotein 9
LGALS12	ENSG00000133317,ENSG00000133317,ENSG00000133317,ENSG00000133317,ENSG00000133317	-0.203982	0.00798468	0.0759969	3550	3073	lectin, galactoside-binding, soluble, 12
DDAH1	ENSG00000153904,ENSG00000153904	0.156	0.00800587	0.0761532	480	596	dimethylarginine dimethylaminohydrolase 1
MSRB2	ENSG00000148450	-0.0980667	0.00803413	0.0763767	1097	1059	methionine sulfoxide reductase B2
ZMIZ1	ENSG00000108175	0.0909254	0.00806275	0.0766033	3754	4270	zinc finger, MIZ-type containing 1
LOC100505678	ENSG00000246859	-0.253338	0.00807546	0.076669	114	92	NA
CCNK	ENSG00000090061	0.0725725	0.00807925	0.076669	716	802	cyclin K
LY86-AS1	ENSG00000216863	-0.347304	0.00810681	0.076885	36	28	LY86 antisense RNA 1
TCTN1	ENSG00000204852,ENSG00000204852,ENSG00000204852,ENSG00000204852,ENSG00000204852	-0.0706448	0.00811721	0.0769312	463	450	tectonic family member 1
ARHGAP25	ENSG00000163219,ENSG00000163219,ENSG00000163219,ENSG00000163219	0.135199	0.00812177	0.0769312	472	564	Rho GTPase activating protein 25
NID2	ENSG00000087303	-0.147366	0.00812665	0.0769312	1462	1346	nidogen 2 (osteonidogen)
KIAA0889	ENSG00000149639,ENSG00000149639	-0.0940106	0.00813169	0.0769312	463	435	NA
PSME4	ENSG00000068878	-0.105816	0.00813571	0.0769312	1172	1076	proteasome (prosome, macropain) activator subunit 4
AKAP8	ENSG00000105127	0.072983	0.00814827	0.0770046	900	1036	A kinase (PRKA) anchor protein 8
ZNF185	ENSG00000147394,ENSG00000147394,ENSG00000147394,ENSG00000147394,ENSG00000147394,ENSG00000147394,ENSG00000267825,ENSG00000147394	0.131267	0.00818338	0.0772413	247	284	zinc finger protein 185 (LIM domain)
USP13	ENSG00000058056	0.163911	0.00819075	0.0772413	754	914	ubiquitin specific peptidase 13 (isopeptidase T-3)
IPO13	ENSG00000117408	-0.0692869	0.00819418	0.0772413	822	818	importin 13
MPP5	ENSG00000072415,ENSG00000072415	-0.08451	0.00819771	0.0772413	787	734	membrane protein, palmitoylated 5 (MAGUK p55 subfamily member 5)
RBBP7	ENSG00000102054,ENSG00000102054	0.059087	0.00820112	0.0772413	2031	2257	retinoblastoma binding protein 7
DBNL	ENSG00000136279,ENSG00000136279,ENSG00000136279	0.0654404	0.00820389	0.0772413	2291	2610	drebrin-like
B2M	ENSG00000166710	0.0915665	0.0082071	0.0772413	79858	89536	beta-2-microglobulin
LOC284379	NA	-0.688522	0.00824702	0.0775714	15	8	NA
FGD1	ENSG00000102302	0.0967896	0.00827972	0.0778332	225	261	FYVE, RhoGEF and PH domain containing 1
CXCL11	ENSG00000169248	-0.364886	0.00829084	0.0778921	40	31	chemokine (C-X-C motif) ligand 11
RPS21	ENSG00000171858	0.104551	0.00832169	0.078136	6288	7498	ribosomal protein S21
TRIP12	ENSG00000153827	-0.0840114	0.00834708	0.0783285	2419	2262	thyroid hormone receptor interactor 12
PRSS35	ENSG00000146250,ENSG00000146250	-0.275649	0.0083665	0.0784223	51	41	protease, serine, 35
ABHD15	ENSG00000168792	0.0937146	0.00836687	0.0784223	1562	1762	abhydrolase domain containing 15
NOD1	ENSG00000106100	0.110572	0.00838344	0.0784884	819	1008	nucleotide-binding oligomerization domain containing 1
PHF11	ENSG00000136147,ENSG00000136147	0.0521376	0.00838595	0.0784884	934	1039	PHD finger protein 11
STXBP3	ENSG00000116266	0.064103	0.00838864	0.0784884	981	1071	syntaxin binding protein 3
ZC3HAV1L	ENSG00000146858	-0.193225	0.00840365	0.0785746	76	62	zinc finger CCCH-type, antiviral 1-like
LOC100507217	NA	0.0801758	0.00841254	0.0785746	1390	1584	NA
NMNAT2	ENSG00000157064,ENSG00000157064	0.264724	0.00841704	0.0785746	598	814	nicotinamide nucleotide adenylyltransferase 2
LOC100505715	ENSG00000267058	-0.208034	0.00841748	0.0785746	47	39	NA
PIH1D2	ENSG00000150773,ENSG00000150773	-0.213373	0.00843151	0.0786597	24	20	PIH1 domain containing 2
CLEC5A	ENSG00000258227	-0.485877	0.0085149	0.0793491	12	7	C-type lectin domain family 5, member A
ADSSL1	ENSG00000185100,ENSG00000185100	0.271323	0.00851808	0.0793491	243	336	adenylosuccinate synthase like 1
HS6ST1	ENSG00000136720	0.0895157	0.00852509	0.0793491	684	767	heparan sulfate 6-O-sulfotransferase 1
ARSB	ENSG00000113273,ENSG00000113273	0.15306	0.00852685	0.0793491	349	409	arylsulfatase B
ANKRD50	ENSG00000151458,ENSG00000151458	-0.113627	0.00853018	0.0793491	643	565	ankyrin repeat domain 50
DOK6	ENSG00000206052	-0.170764	0.00854495	0.079407	70	62	docking protein 6
ARHGAP42	ENSG00000165895	-0.207542	0.00854633	0.079407	304	234	Rho GTPase activating protein 42
ADAM12	ENSG00000148848,ENSG00000148848	-0.128833	0.00855556	0.0794466	1295	1143	ADAM metallopeptidase domain 12
LRCH1	ENSG00000136141,ENSG00000136141,ENSG00000136141	0.073585	0.00857864	0.0796147	808	915	leucine-rich repeats and calponin homology (CH) domain containing 1
KDM5A	ENSG00000073614	-0.0739626	0.0085898	0.0796722	956	898	lysine (K)-specific demethylase 5A
CREB3L4	ENSG00000143578,ENSG00000143578,ENSG00000143578,ENSG00000143578,ENSG00000143578	0.114227	0.00863395	0.0800352	150	181	cAMP responsive element binding protein 3-like 4
ZNF131	ENSG00000172262	0.078329	0.00865608	0.0801939	263	298	zinc finger protein 131
BBOX1	ENSG00000129151	-0.32857	0.00866996	0.0802761	92	69	butyrobetaine (gamma), 2-oxoglutarate dioxygenase (gamma-butyrobetaine hydroxylase) 1
SCTR	ENSG00000080293	-0.268836	0.00868575	0.080322	26	22	secretin receptor
BMPER	ENSG00000164619	0.130354	0.00868728	0.080322	426	501	BMP binding endothelial regulator
MPP2	ENSG00000108852	0.115181	0.00868997	0.080322	64	78	membrane protein, palmitoylated 2 (MAGUK p55 subfamily member 2)
SLC7A8	ENSG00000092068,ENSG00000092068	0.194512	0.00869554	0.0803271	603	740	solute carrier family 7 (amino acid transporter light chain, L system), member 8
RBPJ	ENSG00000168214,ENSG00000168214,ENSG00000168214,ENSG00000168214	0.0745104	0.00874463	0.0807247	3090	3384	recombination signal binding protein for immunoglobulin kappa J region
C20orf29	ENSG00000125843,ENSG00000125843,ENSG00000125843	-0.130771	0.00874866	0.0807247	324	297	NA
ATP5G2	ENSG00000135390,ENSG00000135390	0.0796822	0.00877451	0.0809166	3891	4407	ATP synthase, H+ transporting, mitochondrial Fo complex, subunit C2 (subunit 9)
ZNF34	ENSG00000196378	0.0846617	0.00878718	0.0809618	149	169	zinc finger protein 34
TIMM17A	ENSG00000134375	-0.10062	0.00879202	0.0809618	1242	1189	translocase of inner mitochondrial membrane 17 homolog A (yeast)
CMAS	ENSG00000111726	0.0480024	0.00879743	0.0809618	642	698	cytidine monophosphate N-acetylneuraminic acid synthetase
ZSWIM5	ENSG00000162415	0.159381	0.00879965	0.0809618	69	87	zinc finger, SWIM-type containing 5
SRI	ENSG00000075142,ENSG00000075142	0.0668978	0.00880912	0.0810024	1919	2150	sorcin
MSI2	ENSG00000153944,ENSG00000153944	-0.140274	0.00882514	0.0810793	121	105	musashi RNA-binding protein 2
EIF2A	ENSG00000144895	0.0622819	0.00882761	0.0810793	1682	1851	eukaryotic translation initiation factor 2A, 65kDa
NASP	ENSG00000132780,ENSG00000132780,ENSG00000132780	0.0822002	0.00883757	0.0811242	1266	1463	nuclear autoantigenic sperm protein (histone-binding)
SIL1	ENSG00000120725,ENSG00000120725	-0.105402	0.0088499	0.0811908	1611	1547	SIL1 homolog, endoplasmic reticulum chaperone (S. cerevisiae)
C2orf89	ENSG00000186854	0.202904	0.00885986	0.0812356	103	128	NA
LOC100505648	ENSG00000245849	-0.256729	0.00887082	0.0812497	57	45	NA
TCERG1	ENSG00000113649,ENSG00000113649	0.0801288	0.00887154	0.0812497	1015	1167	transcription elongation regulator 1
MEOX1	ENSG00000005102,ENSG00000005102,ENSG00000005102	0.169892	0.00888218	0.0812592	1670	2155	mesenchyme homeobox 1
PDE8B	ENSG00000113231,ENSG00000113231,ENSG00000113231,ENSG00000113231,ENSG00000113231	0.156887	0.00888273	0.0812592	869	1045	phosphodiesterase 8B
NME5	ENSG00000112981	-0.154491	0.00891024	0.0814643	69	62	NME/NM23 family member 5
EFHA2	ENSG00000155970	-0.126463	0.00893713	0.0816635	463	419	NA
LCA5	ENSG00000135338,ENSG00000135338	-0.108313	0.00898624	0.0820654	200	182	Leber congenital amaurosis 5
RNASEL	ENSG00000135828	-0.0852918	0.0090157	0.0822876	468	446	ribonuclease L (2',5'-oligoisoadenylate synthetase-dependent)
KANSL3	ENSG00000114982,ENSG00000114982	0.0883086	0.00903229	0.082392	1553	1814	KAT8 regulatory NSL complex subunit 3
NUDT12	ENSG00000112874	-0.0935523	0.00904175	0.0824294	428	396	nudix (nucleoside diphosphate linked moiety X)-type motif 12
RCN2	ENSG00000117906	-0.0900382	0.00904669	0.0824294	1641	1551	reticulocalbin 2, EF-hand calcium binding domain
CEBPZ	ENSG00000115816	0.0773169	0.00905476	0.082456	729	814	CCAAT/enhancer binding protein (C/EBP), zeta
PPP1CC	ENSG00000186298,ENSG00000186298	0.0549495	0.00906081	0.0824642	3590	3919	protein phosphatase 1, catalytic subunit, gamma isozyme
DSC2	ENSG00000134755,ENSG00000134755	0.165506	0.00908941	0.0826326	455	544	desmocollin 2
TRIM14	ENSG00000106785,ENSG00000106785,ENSG00000106785	0.306477	0.00908964	0.0826326	364	495	tripartite motif containing 14
MRPL13	ENSG00000172172	-0.0760316	0.00909888	0.082644	561	546	mitochondrial ribosomal protein L13
KHNYN	ENSG00000100441	0.105201	0.00910122	0.082644	2359	2817	KH and NYN domain containing
SUN2	ENSG00000100242,ENSG00000100242,ENSG00000100242	0.0974477	0.00911225	0.0826972	7642	8892	Sad1 and UNC84 domain containing 2
PAF1	ENSG00000006712	-0.0586065	0.0091246	0.0827624	1149	1156	Paf1, RNA polymerase II associated factor, homolog (S. cerevisiae)
SETD9	ENSG00000155542,ENSG00000155542	0.108482	0.009136	0.0828189	146	167	SET domain containing 9
FOXP1	ENSG00000114861,ENSG00000114861,ENSG00000114861,ENSG00000114861,ENSG00000114861,ENSG00000114861,ENSG00000114861,ENSG00000114861	0.104662	0.00916201	0.0829889	1191	1394	forkhead box P1
LRP6	ENSG00000070018	-0.123445	0.00916512	0.0829889	1036	914	low density lipoprotein receptor-related protein 6
CCNYL1	ENSG00000163249,ENSG00000163249	-0.0866243	0.00918514	0.0831232	1127	1086	cyclin Y-like 1
IQCB1	ENSG00000173226,ENSG00000173226	0.0800251	0.0092098	0.0832679	360	410	IQ motif containing B1
CPNE4	ENSG00000196353	-0.336235	0.00921153	0.0832679	13	10	copine IV
RPLP1	ENSG00000137818,ENSG00000137818	0.102471	0.009248	0.0835081	23421	27442	ribosomal protein, large, P1
FRMPD1	ENSG00000070601	0.297105	0.00924909	0.0835081	27	39	FERM and PDZ domain containing 1
SIAE	ENSG00000110013,ENSG00000110013	-0.12855	0.00925375	0.0835081	1531	1422	sialic acid acetylesterase
RASGEF1B	ENSG00000138670	0.254671	0.00931142	0.0839602	139	176	RasGEF domain family, member 1B
ECT2	ENSG00000114346	-0.119249	0.00931434	0.0839602	229	206	epithelial cell transforming sequence 2 oncogene
SLC19A1	ENSG00000173638,ENSG00000173638,ENSG00000173638	0.147982	0.00933685	0.0841157	444	529	solute carrier family 19 (folate transporter), member 1
GORAB	ENSG00000120370,ENSG00000120370,ENSG00000120370	0.107287	0.00934441	0.0841343	273	317	golgin, RAB6-interacting
KATNAL2	ENSG00000167216	-0.111102	0.00934942	0.0841343	201	194	katanin p60 subunit A-like 2
CD300E	ENSG00000186407	-0.466773	0.00935605	0.0841466	92	58	CD300e molecule
LEPREL2	ENSG00000268828,ENSG00000110811	0.168456	0.00936437	0.0841742	312	396	leprecan-like 2
ZNF189	ENSG00000136870,ENSG00000136870	-0.101314	0.00937424	0.0842156	518	494	zinc finger protein 189
RPS5	ENSG00000083845	0.0953049	0.0093843	0.0842241	7024	8247	ribosomal protein S5
TBC1D30	ENSG00000111490	0.153459	0.0093857	0.0842241	52	63	TBC1 domain family, member 30
MED8	ENSG00000159479,ENSG00000159479	-0.0655658	0.0094143	0.0844334	864	856	mediator complex subunit 8
MERTK	ENSG00000153208	0.208145	0.00942809	0.0845097	276	344	c-mer proto-oncogene tyrosine kinase
HYAL3	ENSG00000186792,ENSG00000186792,ENSG00000261855,ENSG00000186792,ENSG00000186792,ENSG00000186792	-0.329526	0.00944477	0.0846014	67	50	hyaluronoglucosaminidase 3
C1orf122	ENSG00000197982,ENSG00000197982	-0.116992	0.0094501	0.0846014	1668	1605	chromosome 1 open reading frame 122
SAA2	ENSG00000134339,ENSG00000134339	-0.615524	0.00945418	0.0846014	10137	6588	serum amyloid A2
CHKB	ENSG00000100288	0.155565	0.00946282	0.0846184	1560	1980	choline kinase beta
H2AFZ	ENSG00000164032	0.0880366	0.00946665	0.0846184	1516	1727	H2A histone family, member Z
SAV1	ENSG00000151748	0.100858	0.00948186	0.084692	1432	1617	salvador homolog 1 (Drosophila)
RPS2	ENSG00000140988	0.123293	0.00948546	0.084692	19985	23809	ribosomal protein S2
CCDC9	ENSG00000105321	0.076833	0.00951088	0.08485	466	543	coiled-coil domain containing 9
GTF2H2C	ENSG00000183474	-0.160894	0.00951517	0.08485	172	155	general transcription factor IIH, polypeptide 2C
ENDOD1	ENSG00000149218	0.0807113	0.00951906	0.08485	923	1050	endonuclease domain containing 1
TP53BP1	ENSG00000067369,ENSG00000067369,ENSG00000067369	-0.0882553	0.00954595	0.0850424	606	572	tumor protein p53 binding protein 1
WDR93	ENSG00000140527	-0.230279	0.00957263	0.0852326	28	24	WD repeat domain 93
PDHA1	ENSG00000131828,ENSG00000131828,ENSG00000131828,ENSG00000131828	-0.126744	0.00958211	0.0852696	2844	2639	pyruvate dehydrogenase (lipoamide) alpha 1
SETD8	ENSG00000183955	0.0567843	0.00961624	0.0855258	894	1018	SET domain containing (lysine methyltransferase) 8
RDH13	ENSG00000160439,ENSG00000160439	-0.0907635	0.00962639	0.0855685	183	182	retinol dehydrogenase 13 (all-trans/9-cis)
SLC26A7	ENSG00000147606,ENSG00000147606	-0.362972	0.00966596	0.0858725	234	164	solute carrier family 26, member 7
CPEB2	ENSG00000137449,ENSG00000137449,ENSG00000137449,ENSG00000137449,ENSG00000137449,ENSG00000137449	-0.101452	0.00968759	0.086017	1040	926	cytoplasmic polyadenylation element binding protein 2
IFNAR2	ENSG00000159110,ENSG00000159110,ENSG00000159110	0.0875235	0.00972038	0.0862131	711	812	interferon (alpha, beta and omega) receptor 2
HPS5	ENSG00000110756,ENSG00000110756,ENSG00000110756	-0.12207	0.00972338	0.0862131	596	542	Hermansky-Pudlak syndrome 5
ST6GALNAC2	ENSG00000070731	0.144945	0.00972583	0.0862131	263	315	ST6 (alpha-N-acetyl-neuraminyl-2,3-beta-galactosyl-1,3)-N-acetylgalactosaminide alpha-2,6-sialyltransferase 2
C16orf70	ENSG00000125149	0.105058	0.00976089	0.086476	429	502	chromosome 16 open reading frame 70
USP21	ENSG00000143258,ENSG00000143258	0.0637627	0.00977711	0.0865717	444	503	ubiquitin specific peptidase 21
HHIP	ENSG00000164161	-0.373439	0.0097852	0.086586	19	14	hedgehog interacting protein
PNPLA3	ENSG00000100344	-0.471912	0.00978953	0.086586	143	95	patatin-like phospholipase domain containing 3
KIAA0182	ENSG00000131149,ENSG00000131149	0.0880949	0.00979524	0.0865886	4377	5052	NA
MYOC	ENSG00000034971	-0.276695	0.00980334	0.0866124	962	808	myocilin, trabecular meshwork inducible glucocorticoid response
C16orf72	ENSG00000182831	-0.0761589	0.00981629	0.086679	1305	1252	chromosome 16 open reading frame 72
SGPL1	ENSG00000166224	0.0838259	0.00983379	0.0867856	749	835	sphingosine-1-phosphate lyase 1
MMD	ENSG00000108960	-0.16682	0.00985148	0.0868939	10898	9631	monocyte to macrophage differentiation-associated
ZNF3	ENSG00000166526,ENSG00000166526	0.0814171	0.00986567	0.08691	486	554	zinc finger protein 3
WDR45L	ENSG00000141580	0.0493487	0.00986743	0.08691	2063	2283	NA
CATSPER3	ENSG00000152705	0.23407	0.00987352	0.08691	11	15	cation channel, sperm associated 3
CMIP	ENSG00000153815,ENSG00000153815	0.0836952	0.00987503	0.08691	1221	1389	c-Maf inducing protein
RSU1	ENSG00000148484,ENSG00000148484	0.078691	0.00989472	0.087	2874	3234	Ras suppressor protein 1
PSMF1	ENSG00000125818,ENSG00000125818	0.0636342	0.00989612	0.087	2150	2369	proteasome (prosome, macropain) inhibitor subunit 1 (PI31)
ERG	ENSG00000157554,ENSG00000157554,ENSG00000157554,ENSG00000157554,ENSG00000157554,ENSG00000157554	0.108144	0.00991393	0.0870782	1579	1876	v-ets erythroblastosis virus E26 oncogene homolog (avian)
GAN	ENSG00000127688	-0.239237	0.00991662	0.0870782	27	20	gigaxonin
BASP1	ENSG00000176788	0.212127	0.00992133	0.0870782	575	699	brain abundant, membrane attached signal protein 1
ATP8B4	ENSG00000104043	0.142431	0.00994005	0.0871947	616	719	ATPase, class I, type 8B, member 4
ZNHIT1	ENSG00000106400	-0.122798	0.00994914	0.0872266	1950	1851	zinc finger, HIT-type containing 1
C9orf21	ENSG00000158122	0.0967271	0.00997669	0.0874203	315	357	NA
C1orf124	ENSG00000010072,ENSG00000010072	-0.0902666	0.00998887	0.0874791	190	180	NA
KDELC1	ENSG00000134901	-0.139574	0.0100374	0.0878445	143	131	KDEL (Lys-Asp-Glu-Leu) containing 1
RBMX	ENSG00000147274,ENSG00000147274	0.0672964	0.0100416	0.0878445	2609	2913	RNA binding motif protein, X-linked
PRDM4	ENSG00000110851	0.071577	0.0100511	0.0878767	676	760	PR domain containing 4
NUP155	ENSG00000113569,ENSG00000113569	-0.0913155	0.0100687	0.0878767	305	283	nucleoporin 155kDa
KGFLP2	ENSG00000204837	0.144808	0.01007	0.0878767	224	271	NA
MAZ	ENSG00000103495,ENSG00000103495	0.0894526	0.0100742	0.0878767	3527	4016	MYC-associated zinc finger protein (purine-binding transcription factor)
SLC25A19	ENSG00000125454,ENSG00000125454,ENSG00000125454	-0.234141	0.0100761	0.0878767	247	208	solute carrier family 25 (mitochondrial thiamine pyrophosphate carrier), member 19
SMARCC2	ENSG00000139613,ENSG00000139613,ENSG00000139613	0.0721117	0.0100782	0.0878767	3611	4135	SWI/SNF related, matrix associated, actin dependent regulator of chromatin, subfamily c, member 2
FRYL	ENSG00000075539	-0.0973586	0.0101038	0.0880523	1464	1336	FRY-like
EIF2B2	ENSG00000119718	-0.0491262	0.0101186	0.0881333	429	431	eukaryotic translation initiation factor 2B, subunit 2 beta, 39kDa
UBE2T	ENSG00000077152	-0.197246	0.0101567	0.0883961	35	30	ubiquitin-conjugating enzyme E2T (putative)
LY6D	ENSG00000167656	-0.909492	0.0101598	0.0883961	16	7	lymphocyte antigen 6 complex, locus D
ANKHD1	ENSG00000131503,ENSG00000131503,ENSG00000131503	0.0714993	0.0101728	0.0884611	1623	1810	ankyrin repeat and KH domain containing 1
LOC554206	NA	-0.134284	0.0101945	0.088565	38	35	NA
CNTD2	ENSG00000105219	0.290565	0.0102008	0.088565	30	45	cyclin N-terminal domain containing 2
STK38L	ENSG00000211455	-0.109094	0.0102014	0.088565	1809	1679	serine/threonine kinase 38 like
LRRC36	ENSG00000159708,ENSG00000159708	-0.240411	0.0102168	0.0886398	19	17	leucine rich repeat containing 36
AZIN1	ENSG00000155096	0.0904532	0.0102211	0.0886398	2577	2874	antizyme inhibitor 1
MAFB	ENSG00000204103	0.16963	0.0102299	0.0886685	2196	2578	v-maf musculoaponeurotic fibrosarcoma oncogene homolog B (avian)
RCVRN	ENSG00000109047	0.356605	0.0102489	0.0887852	10	14	recoverin
GPR124	ENSG00000020181	-0.114467	0.0102656	0.0888815	5422	5114	G protein-coupled receptor 124
TNFRSF19	ENSG00000127863,ENSG00000127863,ENSG00000127863,ENSG00000127863	-0.17269	0.010376	0.0897399	126	110	tumor necrosis factor receptor superfamily, member 19
TTC7A	ENSG00000068724	0.101873	0.0103998	0.089898	1276	1508	tetratricopeptide repeat domain 7A
MLLT6	ENSG00000108292	0.0843539	0.010421	0.0900319	5313	6241	myeloid/lymphoid or mixed-lineage leukemia (trithorax homolog, Drosophila); translocated to, 6
MRPL48	ENSG00000175581	0.0965176	0.0104807	0.0904758	249	289	mitochondrial ribosomal protein L48
IAPP	ENSG00000121351	-0.392977	0.0104861	0.0904758	54	37	islet amyloid polypeptide
SATB2	ENSG00000119042,ENSG00000119042,ENSG00000119042	-0.115915	0.0104893	0.0904758	349	316	SATB homeobox 2
ITM2B	ENSG00000136156	0.0616812	0.0105009	0.0905275	23903	26161	integral membrane protein 2B
TMEM50A	ENSG00000183726	0.0506468	0.010522	0.0906433	2691	2921	transmembrane protein 50A
TMEM86A	ENSG00000151117	0.189011	0.0105257	0.0906433	169	204	transmembrane protein 86A
POP5	ENSG00000167272,ENSG00000167272	-0.0810845	0.0105529	0.0908026	645	630	processing of precursor 5, ribonuclease P/MRP subunit (S. cerevisiae)
PHOSPHO1	ENSG00000173868,ENSG00000173868	-0.666706	0.0105602	0.0908026	39	24	phosphatase, orphan 1
DHRS7B	ENSG00000109016	-0.0722483	0.0105613	0.0908026	811	800	dehydrogenase/reductase (SDR family) member 7B
METTL8	ENSG00000123600	-0.0740476	0.01057	0.0908026	535	527	methyltransferase like 8
USP9X	ENSG00000124486,ENSG00000124486	-0.0930037	0.0105726	0.0908026	3629	3361	ubiquitin specific peptidase 9, X-linked
PHF1	ENSG00000112511	0.109286	0.0105912	0.0908718	1696	2032	PHD finger protein 1
PLBD2	ENSG00000151176,ENSG00000151176	-0.118768	0.0105946	0.0908718	2034	1866	phospholipase B domain containing 2
UBE2E3	ENSG00000170035	0.0664793	0.0105976	0.0908718	2073	2304	ubiquitin-conjugating enzyme E2E 3
MORC4	ENSG00000133131,ENSG00000133131	0.127765	0.010613	0.0909544	654	770	MORC family CW-type zinc finger 4
LOC100506497	NA	0.320791	0.0106238	0.0909813	27	40	NA
PLEKHM1	ENSG00000257339,ENSG00000225190	-0.077336	0.0106349	0.0909813	1272	1249	pleckstrin homology domain containing, family M (with RUN domain) member 1
ATP6V1H	ENSG00000047249,ENSG00000047249,ENSG00000047249	-0.0642138	0.0106464	0.0909813	1095	1063	ATPase, H+ transporting, lysosomal 50/57kDa, V1 subunit H
FAM193A	ENSG00000125386,ENSG00000125386,ENSG00000125386,ENSG00000125386	0.0739485	0.0106496	0.0909813	681	781	family with sequence similarity 193, member A
CX3CL1	ENSG00000006210	-0.173699	0.0106528	0.0909813	1617	1466	chemokine (C-X3-C motif) ligand 1
RGS3	ENSG00000138835,ENSG00000138835,ENSG00000138835,ENSG00000138835,ENSG00000138835,ENSG00000138835	0.245459	0.0106541	0.0909813	1390	1945	regulator of G-protein signaling 3
PCYT1A	ENSG00000161217	-0.0818118	0.0106559	0.0909813	620	596	phosphate cytidylyltransferase 1, choline, alpha
MAT2B	ENSG00000038274,ENSG00000038274	0.069648	0.010701	0.0913179	1617	1796	methionine adenosyltransferase II, beta
ITPR1	ENSG00000150995,ENSG00000150995,ENSG00000150995	-0.153068	0.0107131	0.091372	898	790	inositol 1,4,5-trisphosphate receptor, type 1
DAG1	ENSG00000173402,ENSG00000173402,ENSG00000173402,ENSG00000173402,ENSG00000173402,ENSG00000173402,ENSG00000173402,ENSG00000173402,ENSG00000173402,ENSG00000173402,ENSG00000173402,ENSG00000173402,ENSG00000173402,ENSG00000173402,ENSG00000173402,ENSG00000173402	-0.0913206	0.0107322	0.0914862	2717	2582	dystroglycan 1 (dystrophin-associated glycoprotein 1)
ASCC2	ENSG00000100325,ENSG00000100325	0.0568003	0.0107433	0.0915328	1602	1807	activating signal cointegrator 1 complex subunit 2
NPHP4	ENSG00000131697	0.102703	0.0107626	0.0916484	310	368	nephronophthisis 4
ARFGAP2	ENSG00000149182	0.0565562	0.0107933	0.0918607	1915	2158	ADP-ribosylation factor GTPase activating protein 2
DCAF16	ENSG00000163257	0.0925551	0.0108048	0.0919096	823	947	DDB1 and CUL4 associated factor 16
AFAP1L2	ENSG00000169129,ENSG00000169129	-0.135842	0.0108122	0.0919239	398	387	actin filament associated protein 1-like 2
GIT1	ENSG00000108262,ENSG00000108262	0.0856017	0.0108364	0.0920807	1730	2027	G protein-coupled receptor kinase interacting ArfGAP 1
POU6F1	ENSG00000184271,ENSG00000184271	0.134331	0.0108438	0.0920947	584	723	POU class 6 homeobox 1
PSPC1	ENSG00000121390	0.0635869	0.0108538	0.0921303	596	669	paraspeckle component 1
WFS1	ENSG00000109501,ENSG00000109501	-0.102029	0.0108898	0.0923871	3786	3662	Wolfram syndrome 1 (wolframin)
SPIRE1	ENSG00000134278,ENSG00000134278,ENSG00000134278	0.0666864	0.0108972	0.0924008	813	883	spire homolog 1 (Drosophila)
SNW1	ENSG00000100603	0.0459115	0.0109078	0.0924181	1214	1322	SNW domain containing 1
APP	ENSG00000142192,ENSG00000142192,ENSG00000142192,ENSG00000142192,ENSG00000142192,ENSG00000142192,ENSG00000142192,ENSG00000142192	0.063999	0.0109108	0.0924181	10830	12060	amyloid beta (A4) precursor protein
C5orf51	ENSG00000205765	-0.0653161	0.0109856	0.0930032	875	839	chromosome 5 open reading frame 51
ROR1	ENSG00000185483,ENSG00000185483	-0.158003	0.010997	0.09305	76	65	receptor tyrosine kinase-like orphan receptor 1
SLC25A43	ENSG00000077713	0.0788957	0.011028	0.0931891	708	799	solute carrier family 25, member 43
TMC5	ENSG00000103534,ENSG00000103534,ENSG00000103534	-0.35038	0.0110297	0.0931891	99	71	transmembrane channel-like 5
MUC20	ENSG00000176945,ENSG00000176945	0.251084	0.011034	0.0931891	272	386	mucin 20, cell surface associated
DNAJC11	ENSG00000007923	0.0702364	0.0110367	0.0931891	954	1088	DnaJ (Hsp40) homolog, subfamily C, member 11
ENTPD6	ENSG00000197586,ENSG00000197586	0.0696604	0.0110508	0.0932589	1299	1492	ectonucleoside triphosphate diphosphohydrolase 6 (putative)
SMAD6	ENSG00000137834,ENSG00000137834	0.101684	0.0110626	0.0933094	1034	1198	SMAD family member 6
MPHOSPH10	ENSG00000124383	0.0625212	0.0111113	0.0936284	609	678	M-phase phosphoprotein 10 (U3 small nucleolar ribonucleoprotein)
MS4A6A	ENSG00000110077,ENSG00000110077,ENSG00000110077,ENSG00000110077	0.212708	0.0111146	0.0936284	1452	1776	membrane-spanning 4-domains, subfamily A, member 6A
ST3GAL1	ENSG00000008513,ENSG00000008513	0.0996392	0.011118	0.0936284	1171	1372	ST3 beta-galactoside alpha-2,3-sialyltransferase 1
KIAA0240	ENSG00000112624	0.0641575	0.0111306	0.0936856	661	724	NA
VKORC1L1	ENSG00000196715	-0.151792	0.0111391	0.0937075	2304	2014	vitamin K epoxide reductase complex, subunit 1-like 1
CTDSP1	ENSG00000144579,ENSG00000144579,ENSG00000144579	0.0627947	0.0111508	0.0937566	4469	5028	CTD (carboxy-terminal domain, RNA polymerase II, polypeptide A) small phosphatase 1
SYF2	ENSG00000117614,ENSG00000117614	0.0600482	0.011172	0.0938856	1498	1644	SYF2 homolog, RNA splicing factor (S. cerevisiae)
POLN	ENSG00000130997,ENSG00000130997	-0.219634	0.0111859	0.0938895	149	129	polymerase (DNA directed) nu
SPTBN1	ENSG00000115306,ENSG00000115306	-0.0970484	0.0111891	0.0938895	38962	37124	spectrin, beta, non-erythrocytic 1
SPATS2L	ENSG00000196141,ENSG00000196141,ENSG00000196141,ENSG00000196141	0.0951528	0.01119	0.0938895	1703	1940	spermatogenesis associated, serine-rich 2-like
NCF1	ENSG00000158517	-0.308872	0.0112198	0.0940842	254	197	neutrophil cytosolic factor 1
LSAMP	ENSG00000185565	-0.19267	0.011225	0.0940842	74	64	limbic system-associated membrane protein
ACTL6A	ENSG00000136518,ENSG00000136518,ENSG00000136518	0.0681182	0.0112484	0.0942094	652	726	actin-like 6A
PDE1C	ENSG00000154678,ENSG00000154678,ENSG00000154678,ENSG00000154678	-0.195883	0.0112517	0.0942094	33	28	phosphodiesterase 1C, calmodulin-dependent 70kDa
GAL	ENSG00000069482	-0.654962	0.0112614	0.0942411	69	35	galanin/GMAP prepropeptide
SET	ENSG00000119335,ENSG00000119335,ENSG00000119335,ENSG00000119335	0.0603843	0.0112681	0.0942485	3906	4314	SET nuclear oncogene
NDUFB1	ENSG00000183648	-0.0743249	0.0112786	0.0942864	1847	1809	NADH dehydrogenase (ubiquinone) 1 beta subcomplex, 1, 7kDa
KATNA1	ENSG00000186625,ENSG00000186625	0.0537729	0.0112964	0.094325	396	438	katanin p60 (ATPase containing) subunit A 1
ADCK1	ENSG00000063761,ENSG00000063761	-0.116746	0.0113123	0.094325	319	310	aarF domain containing kinase 1
POP4	ENSG00000105171,ENSG00000105171	-0.0580106	0.0113156	0.094325	641	641	processing of precursor 4, ribonuclease P/MRP subunit (S. cerevisiae)
TRIM65	ENSG00000141569	0.0895255	0.0113161	0.094325	749	880	tripartite motif containing 65
TRIM61	ENSG00000183439	-0.164769	0.0113194	0.094325	50	44	tripartite motif containing 61
ZNF771	ENSG00000179965,ENSG00000179965	0.175226	0.0113216	0.094325	108	140	zinc finger protein 771
SPPL3	ENSG00000157837	0.0714613	0.0113244	0.094325	1335	1485	signal peptide peptidase like 3
CXorf38	ENSG00000185753	0.140411	0.0113488	0.094461	726	873	chromosome X open reading frame 38
ECE1	ENSG00000117298,ENSG00000117298,ENSG00000117298,ENSG00000117298	0.10295	0.011362	0.094461	5909	6994	endothelin converting enzyme 1
LPIN1	ENSG00000134324	-0.200495	0.0113634	0.094461	1567	1367	lipin 1
RPL28	ENSG00000108107,ENSG00000108107,ENSG00000108107,ENSG00000108107,ENSG00000108107	0.108701	0.0113644	0.094461	7167	8313	ribosomal protein L28
SLC46A1	ENSG00000076351,ENSG00000076351	0.0916884	0.0114162	0.0948426	601	674	solute carrier family 46 (folate transporter), member 1
ACHE	ENSG00000087085,ENSG00000087085	-0.256982	0.0114279	0.0948905	55	45	acetylcholinesterase
CCNB1IP1	ENSG00000100814,ENSG00000100814,ENSG00000100814	0.100587	0.0114382	0.0949269	366	434	cyclin B1 interacting protein 1, E3 ubiquitin protein ligase
RPL18	ENSG00000063177	0.103282	0.0114516	0.0949887	9006	10498	ribosomal protein L18
USP49	ENSG00000164663	-0.201695	0.0114609	0.0950171	41	35	ubiquitin specific peptidase 49
ZKSCAN1	ENSG00000106261	-0.163428	0.011468	0.0950261	726	608	zinc finger with KRAB and SCAN domains 1
THADA	ENSG00000115970,ENSG00000115970	-0.0731418	0.0114762	0.0950456	794	767	thyroid adenoma associated
TUFM	ENSG00000178952	-0.0589188	0.0114877	0.0950909	3295	3281	Tu translation elongation factor, mitochondrial
PDZK1IP1	ENSG00000162366	-0.301765	0.0115007	0.0951499	42	34	PDZK1 interacting protein 1
PPIF	ENSG00000108179	-0.12032	0.0115142	0.0951901	1092	1006	peptidylprolyl isomerase F
IMPDH2	ENSG00000178035	0.0783836	0.0115175	0.0951901	1985	2257	IMP (inosine 5'-monophosphate) dehydrogenase 2
SRPK3	ENSG00000184343,ENSG00000184343,ENSG00000184343	0.24711	0.0115422	0.0953451	18	25	SRSF protein kinase 3
NOS1AP	ENSG00000198929,ENSG00000198929,ENSG00000198929	-0.230352	0.0115736	0.0955396	56	47	nitric oxide synthase 1 (neuronal) adaptor protein
SLC44A3	ENSG00000143036,ENSG00000143036	0.135214	0.0115816	0.0955396	48	58	solute carrier family 44, member 3
MTRNR2L6	ENSG00000261913	-0.144606	0.0115845	0.0955396	7245	6806	MT-RNR2-like 6
DGKE	ENSG00000153933	-0.142626	0.0115896	0.0955396	594	542	diacylglycerol kinase, epsilon 64kDa
C21orf119	ENSG00000256073	-0.155373	0.0116159	0.0957071	121	110	chromosome 21 open reading frame 119
DYNLL1	ENSG00000088986,ENSG00000088986,ENSG00000088986	-0.108884	0.0116431	0.0958015	4833	4566	dynein, light chain, LC8-type 1
ALDOA	ENSG00000149925,ENSG00000149925,ENSG00000149925,ENSG00000149925,ENSG00000149925	-0.115336	0.011644	0.0958015	21755	20467	aldolase A, fructose-bisphosphate
GPR35	ENSG00000178623,ENSG00000178623	0.238763	0.0116453	0.0958015	40	53	G protein-coupled receptor 35
INSIG2	ENSG00000125629	0.0892008	0.0116743	0.0959809	451	508	insulin induced gene 2
OSTM1	ENSG00000081087	-0.0831965	0.0116841	0.0959809	2444	2302	osteopetrosis associated transmembrane protein 1
UPP1	ENSG00000183696,ENSG00000183696	0.133412	0.0116851	0.0959809	494	608	uridine phosphorylase 1
OXSM	ENSG00000151093,ENSG00000151093	-0.101163	0.0117161	0.0961236	206	200	3-oxoacyl-ACP synthase, mitochondrial
UBR3	ENSG00000144357	-0.105527	0.0117208	0.0961236	2002	1810	ubiquitin protein ligase E3 component n-recognin 3 (putative)
BPTF	ENSG00000171634,ENSG00000171634	-0.0780351	0.0117245	0.0961236	1340	1261	bromodomain PHD finger transcription factor
TMEM217	ENSG00000172738	-0.583573	0.0117267	0.0961236	10	6	transmembrane protein 217
OXCT2	ENSG00000198754	-0.425645	0.0117325	0.0961236	16	12	3-oxoacid CoA transferase 2
C6orf52	ENSG00000137434	-0.33027	0.0117463	0.0961875	17	14	chromosome 6 open reading frame 52
C14orf159	ENSG00000133943,ENSG00000133943,ENSG00000133943,ENSG00000133943,ENSG00000133943	-0.049694	0.0117546	0.0962061	1128	1126	chromosome 14 open reading frame 159
CDK5	ENSG00000164885,ENSG00000164885	-0.143868	0.0117706	0.0962544	236	211	cyclin-dependent kinase 5
NPAS2	ENSG00000170485	0.190832	0.0117779	0.0962544	89	110	neuronal PAS domain protein 2
TAGLN	ENSG00000149591	0.24478	0.0117785	0.0962544	9315	13326	transgelin
KIAA1432	ENSG00000107036,ENSG00000107036	-0.111719	0.0117901	0.0962986	1063	952	KIAA1432
HAUS4	ENSG00000092036,ENSG00000092036,ENSG00000092036	0.0733879	0.011796	0.0962986	883	1000	HAUS augmin-like complex, subunit 4
FAM98A	ENSG00000119812	-0.140667	0.0118041	0.0963161	1317	1201	family with sequence similarity 98, member A
FKBP4	ENSG00000004478	0.130731	0.0118228	0.0964198	730	871	FK506 binding protein 4, 59kDa
FYCO1	ENSG00000163820	-0.0905018	0.0118351	0.0964504	1906	1812	FYVE and coiled-coil domain containing 1
DEFB132	ENSG00000186458	-0.408355	0.0118418	0.0964504	413	418	defensin, beta 132
TMEM233	ENSG00000224982	-0.415248	0.0118454	0.0964504	11	8	transmembrane protein 233
RASA2	ENSG00000155903	-0.214004	0.0118507	0.0964504	99	73	RAS p21 protein activator 2
COPG1	ENSG00000181789	-0.0673015	0.0118689	0.0965496	3013	3001	coatomer protein complex, subunit gamma 1
CNN1	ENSG00000130176	0.434171	0.0118793	0.0965851	67	104	calponin 1, basic, smooth muscle
VDAC2	ENSG00000165637,ENSG00000165637,ENSG00000165637	0.0648207	0.0118909	0.09663	2625	2910	voltage-dependent anion channel 2
DOLK	ENSG00000175283	-0.069838	0.0119051	0.0966961	513	504	dolichol kinase
SGCD	ENSG00000170624,ENSG00000170624,ENSG00000170624	-0.149712	0.0119315	0.0968621	618	541	sarcoglycan, delta (35kDa dystrophin-associated glycoprotein)
PTPN22	ENSG00000134242,ENSG00000134242	-0.322222	0.011998	0.0973309	139	101	protein tyrosine phosphatase, non-receptor type 22 (lymphoid)
ASB7	ENSG00000183475,ENSG00000183475	-0.0830814	0.0120014	0.0973309	373	355	ankyrin repeat and SOCS box containing 7
RPS20	ENSG00000008988,ENSG00000008988	0.081857	0.0120103	0.0973537	28358	32585	ribosomal protein S20
GPR146	ENSG00000164849	0.163159	0.012056	0.0976745	1898	2427	G protein-coupled receptor 146
ZC3H13	ENSG00000123200	-0.103459	0.0120689	0.0977296	794	721	zinc finger CCCH-type containing 13
IGFBP4	ENSG00000141753	0.103251	0.0120969	0.0979067	15389	18128	insulin-like growth factor binding protein 4
TRIM4	ENSG00000146833,ENSG00000146833	0.09633	0.0121056	0.0979277	826	942	tripartite motif containing 4
C3orf25	ENSG00000172771	-0.286584	0.0121202	0.0979861	38	31	NA
LINC00476	ENSG00000175611,ENSG00000175611	0.103636	0.0121287	0.0979861	158	183	long intergenic non-protein coding RNA 476
PRKAR1A	ENSG00000108946,ENSG00000108946,ENSG00000108946	0.0781594	0.0121312	0.0979861	8345	9165	protein kinase, cAMP-dependent, regulatory, type I, alpha
COL4A3	ENSG00000169031	-0.466595	0.012138	0.0979905	38	26	collagen, type IV, alpha 3 (Goodpasture antigen)
CLDN23	ENSG00000253958	0.149793	0.012144	0.0979905	261	313	claudin 23
PDCL3	ENSG00000115539	0.0948013	0.0121649	0.0980769	323	376	phosducin-like 3
PACSIN3	ENSG00000165912,ENSG00000165912,ENSG00000165912	0.158094	0.0121702	0.0980769	271	341	protein kinase C and casein kinase substrate in neurons 3
GGNBP2	ENSG00000005955	0.0522952	0.0121748	0.0980769	1702	1870	gametogenetin binding protein 2
AMBRA1	ENSG00000110497	0.0477475	0.0121792	0.0980769	477	530	autophagy/beclin-1 regulator 1
NFU1	ENSG00000169599,ENSG00000169599,ENSG00000169599,ENSG00000169599	0.0871985	0.0121928	0.0980931	1443	1647	NFU1 iron-sulfur cluster scaffold homolog (S. cerevisiae)
PODN	ENSG00000174348,ENSG00000174348,ENSG00000174348,ENSG00000174348	0.13628	0.0121935	0.0980931	3069	3745	podocan
ANO3	ENSG00000134343	-0.195342	0.0122057	0.0981426	376	315	anoctamin 3
VSTM2L	ENSG00000132821	-0.378979	0.0122555	0.0984933	36	25	V-set and transmembrane domain containing 2 like
PMS2L2	NA	-0.196091	0.0122695	0.0985558	155	137	NA
DOPEY1	ENSG00000083097	-0.144478	0.012281	0.0985994	517	456	dopey family member 1
FAHD2A	ENSG00000115042	-0.099538	0.0122903	0.0986244	588	580	fumarylacetoacetate hydrolase domain containing 2A
TMEM120A	ENSG00000189077,ENSG00000262309	0.108749	0.0123152	0.0987745	1788	2112	transmembrane protein 120A
PDE1B	ENSG00000123360,ENSG00000123360	0.151115	0.0123364	0.0988948	1040	1284	phosphodiesterase 1B, calmodulin-dependent
LOC441204	NA	-0.179101	0.0124161	0.0994842	130	115	NA
SPDYE7P	NA	-0.14698	0.0124417	0.0996392	404	379	speedy/RINGO cell cycle regulator family member E7, pseudogene
SCARB1	ENSG00000073060,ENSG00000073060	-0.104552	0.0124897	0.0999739	4754	4592	scavenger receptor class B, member 1
SETD7	ENSG00000145391	-0.0926594	0.0125667	0.10054	4795	4430	SET domain containing (lysine methyltransferase) 7
[truncated: 13,974 more rows]
