# Supplementary material for: Bariatric Surgery Induces Disruption in Inflammatory Signaling Pathways Mediated by Immune Cells in Adipose Tissue: A RNA-Seq Study
Source: PLoS One. 2015 May 4;10(5):e0125718. doi: 10.1371/journal.pone.0125718 (PMC4418598; doi:10.1371/journal.pone.0125718)
Supplement: S6 Table — (XLSX) [file pone.0125718.s012.xlsx]

## Sheet: Feuil2
Table S6: Description of modules identified by WGCNA at T0. Genes in modules are ranked according to module membership (MM) from highest positive to lowest negative values.
The grey color indicates genes belonging to the GO class(es) enriched for the corresponding module, the light green color indicates genes differentially expressed (DE) and the dark green color indicates genes belonging to both categories
Module	grey60	black	blue	greenyellow	plum	magenta	tan	darkred	violet	darkgrey	darkorange	lightsteelblue	steelblue	skyblue	yellowgreen	lightyellow	paleturquoise	saddlebrown	turquoise*	ivory	orangered4	sienna3	darkmagenta	green	lightcyan*	lightcyan1	grey
Size	1240	438	1876	210	87	246	203	412	102	299	125	62	108	88	89	169	503	109	1901	56	75	94	94	434	911	59	10
GO class enrichment	GO:0048704 "embryonic skeletal system morphogenesis"	GO:0016021 "integral to membrane"	GO:0005747 "mitochondrial respiratory chain"	GO:0006414 "translational elongation"	GO:0009615 "response to virus"	GO:0007166 "cell surface recept. signal. pathway"	GO:0006952 "defense response"	GO:0005739 "mitochondrion"	GO:0008610 "lipid biosynthetic process"	none	GO:0051494 "negative regulation of cytoskeleton organization"	GO:0005576 "extracellular region"	GO:0005576 "extracellular region"	GO:0005576 "extracellular region"	GO:0005576 "extracellular region"	none	GO:0006351 "transcription"	none	GO:0006952 "immune response"	none	none	none	GO:0007398 "ectoderm development"	GO:0007167 "enzyme linked receptor protein signaling pathway"		none	none
GO class enrichment						GO:0005833 "hemoglobin complex"			GO:0008203 "cholesterol metabolic process"					GO:0031226 "intrinsic to plasma membrane"
									GO:0006631 "fatty acidl metabolic process"
Nb of DE genes T0-T3	72	12	102	29	7	11	1	93	29	64	35	13	7	8	8	15	45	2	94	5	1	6	5	28	63	10	0
% of DE genes T0-T3	5.80645	2.73973	5.4371	13.8095	8.04598	4.47154	0.492611	22.5728	28.4314	21.4047	28	20.9677	6.48148	9.1	8.98876	8.87574	8.94632	1.83486	4.94477	8.92857	1.33333	6.38298	5.31915	6.45161	6.91548	16.9492	0
Genes in the module	SFSWAP	TIE1	SELO	RPL24	IFIH1	LCK	S100A9	GYS1	ACLY	ABCC3	HSPB8	MXRA5	PPL	PAMR1	FZD7	RASA1	NIPBL	SDCBP	MAPK13	ZNF192	CG030	SLC25A36	KRT15	ATF7	GTF2I	WWC2	SPDYE1
	LOC155060	PKN3	ZBTB17	RPS8	IFI44L	CD79A	S100A8	MMP15	FADS1	SRPRB	PLA2G4A	COL5A2	PDGFRA	TNXB	LUM	FAM91A1	ARFGEF2	SGMS2	FERMT3	RNPC3	NKTR	RICTOR	FLG	SBF2	BCL2	CLCN4	CNNM1
	SUN1	USHBP1	TAZ	RPL13AP5	IFI44	CARD11	CSF3R	PRDX2	ACACA	TUBB2A	SEC22B	ADAM12	C1R	PI16	COL6A3	ZC3H12C	NCOA2	SPRED1	CD300LB	HSP90AB2P	OGT	RCOR3	TFAP2A	EIF4EBP2	PCYOX1	LPGAT1	DES
	MBD6	ESAM	QTRT1	RPL35	ISG15	PIM2	RGS2	PPAPDC3	LPIN1	SLC7A4	SAR1A	GNG2	DCN	SCARA5	CD44	CD47	ZNF354C	RAB8B	PLEK	LOC100131257	LUC7L3	FAM76B	SCEL	ESYT2	GIGYF2	PTPN11	GDPD1
	TSSK3	ADCY4	CDC37	RPS11	HERC6	IL18RAP	FPR1	GPX1	ATP2B4	CDC20	OSTM1	CALU	MAN1C1	CD55	SSC5D	FCHO2	SLK	ADAM10	RPS6KA1	LUST	LOC100499177	BRWD3	FLG2	ZCCHC11	KIAA0564	EHBP1	MYH11
	HOXA3	C17orf28	FAM50A	RPL36	IFI27	BCL11B	BIN2	MRAP	FADS2	CD248	DLEU1	COL4A1	AHNAK2	CD70	COL1A2	SPAG9	LRCH3	SNX30	LCP1	LOC100190986	DMTF1	MYSM1	CDSN	SIN3A	PTGER3	CAV2	CSRNP3
	LENG8	JAG2	IRF3	FAU	OAS2	CD247	S100A12	ABCC6	GPAM	STMN2	EHHADH	SPARC	ITGBL1	GPR133	SCARA3	KIAA1033	CTDSPL2	TMEM65	NCKAP1L	MDN1	HNRNPU.AS1	LOC100506710	KRT5	TNS1	FERMT2	B4GALT6	LOC644172
	ATXN2L	PLCG1	NUBP2	RPL18A	RSAD2	LEF1	GLT1D1	ADORA1	AACS	TIMM17A	ANGPT1	FSTL1	CTSK	CILP	C6orf132	CEP170	NF1	GAS7	ST14	XIST	GCFC1	ARID4A	COL7A1	PHF3	CLMP	TRUB1	ZNF99
	NRBP2	ARAP3	CPSF3L	RPL11	IRF7	LOC100130231	RGS18	UQCRH	SREBF1	PGP	FAM198B	COL4A2	PTGIS	VIT	COL1A1	N4BP2	LATS1	ERO1L	NCEH1	LOC646214	GNRH1	KIAA1147	COL17A1	EPB41L2	PEX19	COBLL1	DNAJC22
	SIN3B	PDE9A	WDR13	RPS15	CMPK2	MMP25	TRAF3IP3	AIFM1	INSIG1	DPP3	STK40	CCDC80	PTGES	SPSB4	MARVELD1	PPIP5K2	ATE1	PTGFRN	NPC2	LOC440297	CREBZF	JHDM1D	EPS8L1	FGD5.AS1	CAP2	ADAM22	SLFN12L
	TSPYL2	KANK3	PRR14	RPL8	IFI6	FAM129C	NFE2	PPIF	CYCS	AP2M1	MTCH2	ATRN	GAS1	PTHLH	COL8A2	SLC4A7	STAG1	TMEM106A	MPP1	KIAA2026	PNISR	TRIM33	SFN	PTPN21	CYP2U1	ZEB1
	CSNK1E	ARHGEF15	CDK5RAP3	RPL37A	UBTD1	MYBL1	VNN2	ARPC5L	MME	P4HB	FAM173B	RAB6B	C1S	C17orf58	ARSI	DICER1	SPIN1	TMEM127	IGSF6	LOC100216546	DDX17	SENP7	DSP	ATP9A	C7orf58	FYCO1
	MTA1	CD320	DMAP1	RPL18	IFIT1	SLC25A37	SERPINA1	HSPA12A	LGALS12	STK17A	STEAP1	ASAH1	FGF14	TPPP3	FAM102B	SLC30A7	GNAQ	WNT2	CCR1	RALGAPA1	SF3B1	EPM2AIP1	KRT10	ARHGEF6	MSRB3	CD46
	TENC1	C20orf160	HDAC10	RPL9	DDX60	ITK	RASSF5	C19orf80	CLCA2	STK38	SPTA1	PPIC	PTGFR	PROCR	MAP1A	CPEB2	DIAPH2	SERTAD2	PLAUR	ORC4	ZMAT1	TTC21B	TRIM29	TMEM132C	SORBS1	RNF180
	PNPLA7	DOCK6	LUC7L	BCL7C	MX1	ACAP1	GAPT	GLRX2	DLAT	SLC35G1	RAD23B	EXTL2	ECM1	HUNK	IL17D	FAM46A	TTBK2	DOCK10	CD52	NR2C2	GOLGA6L5	BTAF1	EVPL	RBMS3	MID2	ALDH3B2
	MLL4	INPP5K	CCS	RPS16	FLJ36777	MS4A1	SELL	UNC13C	ELOVL6	AADACL3	AKR1C3	HSD17B4	IGDCC4	SLC17A7	ZNF469	ODZ1	SPOPL	HGF	ITGB2	LOC653075	LOC653061	MLL	S100A14	PPM1A	FAM213A	TSGA10
	SHANK3	CASZ1	CLTB	RPS19	OAS3	KIAA0748	IKZF1	ADCK1	APBB1IP	SLC27A4	MGAT3	NANOS1	DCLK1	RARG	XPNPEP2	FEM1C	RC3H2	AHR	HK3	DNM1P41	ACCS	ZC3H6	KRT77	SH3D19	ARHGAP35	PHOSPHO2.KLHL23
	TUBGCP6	CC2D1A	WDR45	RPL29	MX2	CD6	AMICA1	PIK3C2B	DHCR7	C20orf24	CCNYL1	PIGW	CPA3	GPR12	COL14A1	DENND4C	ANKIB1	NUFIP2	LAPTM5	NBPF7	CCDC14	FAM161A	CLDN1	ADNP2	CHRDL1	RGS22
	H1FX.AS1	CDH5	NDUFA3	RPS28	DGAT2	LTB	TUBB1	NR2F6	ECHDC1	C11orf24	SPTAN1	MFAP5	GLT8D2	DACT2	GFPT2	NIN	TMED8	PGM2	FABP3	HOXA.AS3	SLC25A27	FAM160B1	KRT2	SCAPER	SIK2	PMS2P3
	HOXB3	TEAD2	EGFL7	RPS21	C9orf95	PHOSPHO1	CD48	PRRT4	TANC2	PSMD14	SLC39A6	GMFB	CTHRC1	DBNDD2	VCAN	PI4K2B	HIPK3	CMKLR1	NPL	LOC148696	TUBE1	ZNF441	SBSN	TLN2	SETD7	PCDH9
	GIGYF1	BAIAP3	TBCD	ATP5G2	DDX58	TMC8	NOD2	ECHS1	SPTSSA	GARS	SEPT11	PRELP	CHL1	OGN	COLEC12	SACS	VPS13B	KIAA1524	PLA2G7	ANKRD20A9P	HCG27	ARHGAP12	LGALS7B	GAB2	ACVR1C	ACOX1
	KIAA0913	LNX1	B3GAT3	RPS7	PARP9	CD3E	FAM65B	NDUFB3	ME1	PIF1	AKR1C2	AOC2	SEMA3D	KCNK1	PCOLCE	GAS2L3	MYO9A	CISD2	IFI30	C2CD3	TIA1	FAM126B	LY6D	LHFP	KCTD20	PTPRZ1
	CCNL2	ABLIM3	PRPF31	IDH3G	AZGP1	ZAP70	PTPRC	UQCR10	HCAR2	LACE1	STIM1	PLBD2	CXCL14	SH3PXD2B	HAS2	KIF20B	ZNF12	TMOD3	LPXN	PGM5P2	GOLGA8B	ZMYM2	KRTDAP	TNKS	YIPF6	CACHD1
	DVL3	LGI4	C16orf48	EEF1D	KIF27	ALAS2	LST1	ISOC2	LOC100130872	PSMA3	TAF13	ALG1	VASH2	MATN4	LOC100505633	C9orf72	TAOK1	LACC1	CD53	ANKS4B	NR2C2AP	AKAP9	C12orf39	SMAD7	TMEM64	ZFP106
	ULK1	CCDC106	SSNA1	SERPINB6	LURAP1	RLTPR	TREM1	ATP5A1	ACSL3	GMPPB	KANK4	GALNTL1	SRPX	ABI3BP	LRRC17	MIS18BP1	ARHGAP5	SNX18	HEXB	RBAK	NEK3	ZNF432	CALML5	SOS2	NEO1	GRHL1
	PML	PPP1R13B	GADD45GIP1	LOC100289187	CYP3A5	CD7	PIK3CD	BRP44	IDI1	FAM98A	QPRT	KIAA0090	TPSB2	FBLN1	FAM180B	ATM	SNX13	SEC24D	CYP27A1	LOC100505678	CARD8	NR2C1	DSC3	CRY2	DLG1	ITPR1
	AKAP8L	SLC9A3R2	NME3	RPLP1	BLVRB	SYTL1	PARP15	FAM171A2	KIAA0408	PRDX1	GGCX	GALNT1	CTSG	WSCD2	TMEM119	DENND1B	FAM171B	MAPRE2	KCNK13	GOLGA8E	LOC375010	ANKRD36	FGFR3	ACVR1B	YAP1	ZNF669
	EZH1	CXorf36	TRMT1	EDF1	HAUS4	CXCR1	FCN1	POP5	ELOVL5	ALG9	SFRP4	FKBP9	MS4A2	FRMPD1	FAM43B	PHTF2	RAB11FIP2	TGFB2	CD300C	LOC283089	ANKRD10	KIAA1107	LGALS7	UBR3	GPR180	NHLRC3
	HOXD4	C19orf29	KRTCAP2	C12orf10	SLC15A2	CD5	MXD1	COX7B	NXPH4	PALLD	RCN2	QPCT	TPSAB1	F10	GPR153	MITF	DPP8	TLR4	KCNAB2	OSTCP1	MALAT1	TBC1D2B	LOC283547	ARHGAP32	MARK1	SSTR1
	REXO1	EBF4	PPP1R12C	FLT3LG	BOK.AS1	SLAMF1	APOBEC3A	NME1	ACSS2	CCND2	RNLS	SPON2	THBS2	DBN1	NT5E	ATL3	IREB2	HMGCR	RAC2	KIAA0754	LOC100190938	PHIP	FXYD3	NPR2	FAM69A	TMTC1
	SGSM2	BRF1	C9orf142	RPS24	MTRNR2L3	PRKCQ	TSPAN32	GLRX5	LPCAT3	URB2	EIF4G1	LOC100009676	NUDT11	FAM19A5	PENK	LCOR	PIAS1	OSTC	CD180	BMS1P1	ODF2L	CCNG1	IRF6	AZIN1	CFL2	NRXN1
	PRMT7	DHRS3	SHARPIN	RPL12	AMZ2P1	CXCR2	TMEM71	CES1	DHCR24	CCT5	UGP2	ALG10	CP	ADAMTS16	KCNA1	SP7	MAP3K2	IPMK	SASH3	BMS1P5	HLA.F.AS1	TMEM25	TNFRSF19	DDHD2	LONP2	OLFM2
	RBM33	PLCB4	ADCK5	RPS5	ZDBF2	RASGRP1	FYB	TMEM139	MRPL19	PNO1	C4orf19	TUBB6	HPGD	SLPI	CTXN1	FSD1L	QSER1	SGTB	CTSB	CEPT1	CLK4	KDELC2	LAD1	YPEL2	PALM2.AKAP2	USP6NL
	NUMA1	HYAL2	PTOV1	BST2	GLUL	SLC4A1	CLEC12B	KLHL31	ARHGEF40	GLB1	CNN3	INTS7	PRRX1	HSD3BP4	IL13RA1	PROS1	CPNE3	HRH2	SLAMF7	FAM13A.AS1	MDM4	PLAG1	C1orf115	NEK7	ASPH	PALM2
	LCAT	MTMR9LP	FASTK	POLR2I	CREB3L1	SH2D1A	CYTIP	CKMT2	CYP3A4	SLC39A7	LOC100507632	ADAMTS15	RGS13	B3GNT9	CAMKK1	LCORL	DMXL1	IQGAP1	STXBP2	AP4E1	ZNF354B	KLRAP1	CST6	CYTH3	PEX2	IRF2BPL
	NEURL4	MMRN2	ANKS3	ARL6IP4	NT5M	HBM	IL1B	ALDOC	SRCRB4D	BAMBI	FAT2	ERBB2	SNED1	WNT10B	PHF19	ZNF736	EGFR	RNF24	FGR	ARHGEF26.AS1	NOVA1	CXorf38	LOC650623	ZNF785	ADIPOR2	FRZB
	HOXD3	HOXD.AS1	LSMD1	RPS27	ZNF429	TBC1D10C	CD1D	ALAD	TMEM135	IRF8	AQP11	LAMB1	ASB13	PDLIM4	DPY19L1	PDK3	PPM1L	ANXA4	CXCL16	CLCN5	LOC100287846	ZNF100	KRT14	ZBTB4	RNF145	ARHGEF35
	KIAA0907	IGF2.AS1	LDLRAD2	RPL36AL	LOC283788	GPR97	CSF2RB	UGT1A7	LINC00263	RRP12	MID1	ENC1	OLFML1	CCDC34	PTGER2	ENHO	BIRC6	DCAF7	CTSZ	ZNF619	CLK1	ZNF655	KRT1	MED13L	RTN4	CD200
	XRCC3	TUT1	SCAND1	RPL39	PPP2R5A	KLRB1	CCR2	C6orf106	EHF	SLC22A12	TYSND1	IARS	PLXNA1	C1QTNF2	DZIP1	ANKRD36BP1	MAN2A1	SLC17A5	SLC7A7	GFOD1	ZNF676	ATCAY	SPICE1	GPATCH8	SERINC3	HES1
	TNRC6A	DLL4	MAPK11	CCDC12	AZGP1P1	TCF7	FCGR3B	MON1A	PRUNE2	SELRC1	AKIRIN1	SERPINF1	ADAMTSL1	MTMR11	SYS1	CALM2	STAG2	BRCC3	TRPV2	PTGDR	LINC00086	WDFY2	TP63	SPEN	C20orf30	GPR35
	INPP5E	RGN	RPS19BP1	FBL	APOB	GPR114	MYCL1	CYB5A	SLC2A6	ARF4	PLIN4	KHDC1	CMA1	PCNXL2	WBSCR17	ZNF385B	C10orf118	RP2	GALM	LOC100506334	BMP7	LOC100507557	HSPB2.C11orf52	TOB2	ZBED3	GPR132
	FAM160B2	MTERFD3	CTBP1	RPS10	XCL1	KRT8	CD300LF	PSMB5	PNPLA3	ATR	TRIM16L	ADRB2	FPGT.TNNI3K	RXRG	AXL	ZNF518A	GTF2A1	KCNMA1	MATK	LOC147804	ZNF540	HNF1A.AS1	CALML3	MPP6	AR	VMO1
	AGAP11	SCARF1	OSBPL7	EIF4EBP3	RASGRP3	CD8B	ITGA4	AGXT	MCM10	ALG3	DYNC1H1	ZBP1	MMP2	PXDNL	TFPI	CRLF3	C14orf49	SLC8A1	CD68	SFMBT2	POU5F1	IL18R1	SLC14A2	HIVEP2	SC5DL	WEE1
	RHBDF1	MYCT1	CCDC61	VPS28	LOC100505549	FCRL3	PROK2	OXCT1	CDO1	TGM1	SYAP1	RAD54B	C14orf132	HIC1	THBS3	SMC4	RSF1	F13A1	RGS1	CHORDC1	LOC391322	CRX	LYPD3	NEDD4L	USP9X	KCNJ2
	SZT2	ADAM15	HAUS7	SLC43A1	FAM108B1	HBA1	CLEC12A	CDKN2C	IDH1	TGM5	ELP3	CARHSP1	STIL	NHSL1	DCX	VWA5A	C9orf102	RIPK2	BTK	LOC100506314	C12orf65	MATL2963	ARL15	TACC1	LOC283624	FAM158A
	ECHDC2	TINAGL1	C17orf90	TPRN	KLF6	IL7R	CD300E	LSM10	FCN2	ERN2	CDKN2B	SLC4A5	IL17RD	PANK1	GPSM2	FAM129A	JMJD1C	OSBPL11	ARPC5	DNAJC28	FAM111A	DOPEY1	EPCAM	CRTC3	SH3GLB1	DNM1
	SEC16B	ALS2CL	RBM10	TSEN54	IGSF21	HBB	ARHGAP9	UQCRFS1	HMGCS1	ENO1	TEX2	FIBIN	IGFBP3	VSTM2L	OLFML2B	LOC653653	STRN	RAP1GDS1	ACP5	ABCA1	NPHP3.ACAD11	EIF2C4	PKP3	BMPR1A	PREPL	MAPK7
	MYH7B	AGAP2	RHOT2	IFITM3	SPTBN5	SAMD3	CFP	KPTN	DBI	IDH2	NMT2	PTGIR	WASF1	C1QTNF4	SYNJ2	MALT1	PCGF5	EMB	MFSD12	SOSTDC1	GSTT1	TRIM2	FZD3	ERMAP	AP3M1	C14orf80
	FAM193B	SEMA6A	MRPL28	RPL13	ADCYAP1	CD27	AMPD2	HSPD1	CNTN6	PGM3	TSPAN2	PPAP2C	MFAP4	KCNIP3	UST	DRAM2	KCNT2	SRD5A1	TREM2	ESM1	SNHG10	ANGEL2	LINC00167	MAGI2.AS3	SYNJ2BP	CDC42EP5
	ANO8	RBM6	ARRDC1	LOC100505483	SPESP1	MAL	SORL1	NES	LOC149837	CCL26	FBXL19.AS1	ZNF33B	HDC	LINC00341	MMP27	BEX4	PTPRG	FAIM2	GM2A	SNORA61	TRPC1	MMS22L	GATC	ZNF366	DCBLD2	PTMS
	PNN	CASKIN2	ATP5D	RPL21	SORCS2	HBD	CD244	SLC25A11	KLHDC10	KLF14	DYNLL2	RAC3	C3	RFX2	SIGLEC11	ANGPTL5	CDKL5	FMN1	ATP6V1B2	FAM177A1	DPY19L2	SYNJ1	LOC284751	CRIM1	RBFOX2	RP9P
	PRPF3	ECSCR	CDC34	SMARCD2	KCNMB3	CCR7	LIMD2	OGDH	GYPC	APEH	ACO1	LOC100131176	GDF6	GPRC5A	GLT25D2	ZNF91	LRRC58	TGFBI	ITGAX	OXT	ZNF600	UBN2	ANXA8L2	FGF2	PDGFC	STAB1
	POGZ	TNIP1	LIN7B	RPS18	TTC3P1	ZNF831	ANKRD44	HIST2H2BE	MVD	RPN2	MEGF8	BEND5	TPST1	LOC441666	DKK1	CCDC144B	OIP5.AS1	FRMD4B	DOK2	PTRF	TMEM136	UBE2Q2P1	DSG1	PDE3B	ZAK	HOXD1
	DNAH1	DCLK2	C16orf13	TNXA	CDR2	CMTM5	SELPLG	MECR	CLMN	CTPS	DUSP14	ROM1	SYNGR1	CCL23	CPZ	ZBTB34	KIAA1430	EGLN3	LIMK1	PLA2G4C	YTHDC2	THSD7A	LOR	KAT6B	ASH1L	BATF3
	CLASRP	ZBTB46	OGFOD2	PMM1	CTGF	DGKA	NUP210	NDUFB2	THRSP	VARS	GBE1	WDR86	OSR2	MAFG	LOC729799	LPCAT2	ATF7IP	CBWD3	PTPRO	C17orf101	LOC643406	TMEM144	SFTPD	C17orf75	SCRN3	MYO7A
	DONSON	FAM70B	C19orf66	HLA.B	PAPPA	UBASH3A	GCA	FASTKD1	FAT3	SCFD2	LOC100379224	LOC100506394	AEBP1	CD24	FAM182A	ATP8B4	PJA2	SCN9A	SLC16A3	POLR2E	PCGF3	RIMKLB	MYLK	PHC3	ZC3H13	NFKBID
	MAPK8IP3	TMEM11	VPS16	DGCR6L	PRORSD1P	PRF1	LILRA5	NDUFB5	CDH6	SLC4A3	STAC	CAPN11	CCNB1IP1	STON2	RTN4RL1	CMYA5	TRIP11	PLSCR1	KYNU		UGT8	MYO6	CDHR1	CREBBP	MUM1L1	REEP4
	CIRBP	MAPK3	EIF3G	FANCL	THBS1	LOC439949	MST4	ITPR2	LYRM7	GPBAR1	TSEN15	HDDC3	PLP2	PIEZO2	SLC7A11	ZNF295	SOX5	HEATR8.TTC4	EGR2		TMEM213	TMEM56.RWDD3	GRIA1	UBR5	EFCAB3	SERPINF2
	FAM156A	SYT7	ZNF358	RPL13A	CGREF1	NLRC3	ADAM8	CCDC162P	P2RY8	TEX26	SYT11	MBL1P	BHLHE22	LOC100505806	SNORA63	CACNB4	FEM1B	SPTLC2	DNASE2B		AKAP5	COL28A1	LOC100506388	ARHGEF10	KCNB1	NCF4
	WDR59	TECPR1	MAP2K2	RPL41	XBP1	SEPT1	ALOX5	HPD	CRHR2	GTF3C6	CALD1	EML3	OSR1	CYP2C18	KCNK5	P2RY1	MARCH6	GEM	KCNN4		ELMOD1	BCRP3	RND2	C17orf103	ANO6
	PHC1	KLHL23	TRMU	HLA.DPB1	ZNF439	LOC100506779	MGAM	KLB	SPDYE5	CYP19A1	NKD1	MACROD1	WDR17	DKFZP686I15217	LOC100128338	FBXO45	RANBP2	HAS1	WDFY4		CCR6	KIN	TP73	LOC100288615	KIAA0087
	SLC6A16	APOL3	PIGQ	EPB41L4A-AS1	KIAA1522	R3HDM4	CLEC7A	SLC14A1	FGF18	BZW2	LDHA	ABTB1	CCDC8	SDK1	SPIB	C12orf32	NR3C1	ZNF860	TMEM206		ZC3H12D	LRRC8B	RGPD6	MACROD2	C9orf5
	TRIP10	INF2	ANAPC2	MUSTN1	POMZP3	CYFIP2	PTAFR	AGPAT3	SLC2A5	ALS2CR11	URB1		MASP1	SERF1B	TTC12	KLHL28	ZNF148	RGPD8	SLC4A8		ZKSCAN3	LOC100506207	KL	CTTNBP2	FOXN3
	HDAC6	NDUFA4L2	MRPL55	ISG20	TNMD	CD3D	C11orf21	ABCF2	SCN5A	TMEM158	DHDDS		SPOCK1	PCDHA2	GBP4	ZNF486	MAML2	CRTAC1	ALCAM		STX16.NPEPL1	ZNF222	HEYL	DSE	EXOC6B
	BTNL9	TBX2	SURF2	MEOX1	SLC7A2	HBG2	HAL	SLC39A3	POLR1A	SEC61G	AARS		LOC729737	RWDD2A	FGF8	MRGPRX2	AFF4	CNNM2	CAPG		SNX29P2	ANKRD12	GJA5	HILPDA	ZNF664
	LOC100132247	KIF26A	DPM3	FAM212A	TNFRSF12A	HBQ1	USP15	C10orf114	NSDHL	PSMB2	ARPP21		C1orf186	GMEB1	GIMAP7	ATP11A	FNIP2	CBLN2	CNIH3		RYR3	BMP3	VEGFB	NIPSNAP3B	FAM20B
	SH2B1	ZDHHC8	NDUFA2	TNFRSF18	BMS1P4	SLC9A3R1	CLEC4E	CCDC71L	ADAMTS9	CPA2	DLC1		GDF10	IGF2BP2	PDZD7	FOXRED2	BBX	AFAP1L2	PIK3AP1		C15orf37	RASAL2	C9orf125	ZFAND5	UTP14C
	LOC100505696	SEMA6C	ARFGAP1	A4GALT	CECR7	AHSP	CD101	ARMC6	LINC00242	PDZD3	PRRG1		CFB	SMN2	RAG1	LYST	ATP11B	PCDHB6	SDS		IL20RB	LOC100507053	ESRG	KAT6A	MYZAP
	FNBP4	TTLL10	MAPK12	DHX58	MAPT	GRAP2	CORO1A	GSTK1	LMO4	SND1	LINC00346		ZNF503	AQP1	GNG7	SLFN12	NHLRC2	EGFEM1P	VAMP8		RGPD3	ASB11	TNFSF9	FOXJ3	CLIC4
	LOC613037	NRN1	ELMO3	LOC100132163	NUAK1	CD2	PMAIP1	C1orf31	SERPINI1	AQP4	PIGS		BCORL1	SPIN2B	GIMAP5	TMPO	STT3B	PEG3	STAC3		PGA4	S100A1	SH3GL1P1	ZNF827	GFPT1
	MDC1	GPR4	NDUFV1	PHYHD1	FILIP1L	SKAP1	BIRC3	PDHA1	CETP	TUBB4B	PNPLA4		LOC645166	EBPL	CCDC58	GPD2	ROCK2	LOC100289341	H2AFY		DNAJC25	NPAS3	GEN1	GABARAPL1	HIPK1
	CSAD	FAHD2A	SLC25A28	GCOM1	C15orf59	CPA1	SNX20	MYEOV	NID2	LOXL4	AJUBA		LOC100128788	KIAA1549	PLCD4	ZNF675	SCYL2	ZNF44	GPR183		SLC35E2	SNORA33	PCDHA11	CCNG2	PRDX3
	SRSF4	SEMA4C	D2HGDH	TOMM7	JPH2	TRIM58	MYO1G	OSCP1	BANP	LCNL1	CDRT1		IRX3	PLCB1	IFRD1	RPL21P28	RNF150	TMEM116	NAGA		CPT2	RYR1	CDR1	SNX33	KANK1
	LOC653160	GZMH	SPSB3	FOXO3B	TXNRD1	PTPRCAP	FGD3	OXNAD1	C14orf23	CYBASC3	GUCY1A2		CARD14	LOC100128822	CCL4L1	ZNF273	KIF2A	ZNF331	SLC29A3		NOMO2	UCHL1	ARMCX5.GPRASP2	POU2F1	MAN1A1
	YPEL3	AGPAT2	MUS81	SVOP	CHST3	HBG1	NCF1B	TMEM183B	INTS4L1	CSN1S1	ANAPC13		SNORD22	NRXN3	CCL4L2	TSPAN8	CASP8AP2	LOC100288748	C1orf162		GSTM3	TPTEP1	CDH13	TBX15	NTRK2
	RAPGEF3	FLT4	STUB1	IFITM1	CCRN4L	JAK3	CXCR4	KLHDC8B	MDH1	PCDP1	SSTR2		SDCBP2	KIAA1045	KBTBD11	STX3	RBL2	SETD6	SPI1			SCPEP1	DSN1	TEF	AKAP12
	FRS3	RAPGEFL1	CXXC1	GHDC	C1QTNF5	GNLY	TLR1	DEFB132	HOXB.AS3	CPA4	TSHR		CXCL11	EPHA4	MARCH2	RPL17-C18ORF32	ATRX	COL24A1	SLC15A3			DNAJC15	CD3G	KLF9	MMD
	ARHGAP33	PKD1L2	TRMT2A	GAS5	NCALD	S1PR4	EMR1	SCD	CHST9.AS1	SULT1A2	PLOD2		LOC100507178	EXOG	PIM1	LUZP2	AVL9	PZP	MSR1			PEMT	CLSPN	POT1	RGP1
	ZNF662	SIK1	AZI1	FAM45B	BEST1	SP140	FPR2	THOP1	C10orf32.AS3MT	PLIN2	POLR1B		LOC653566	SCN8A	CCNH	LBX2	G2E3	PPP1R1A	LIPA			KCNK15	HDDC2	AMIGO2	EMP1
	NISCH	CARD10	CAPS	DGCR6	RRAS2	SIT1	TLR2	PCYT2	TTC7B	MPHOSPH6	FAM154B		LINC00487	C17orf96	PTPRU	SYTL3	RASA2	GADD45A	TM4SF19			SLC38A10	LOC100287177	SMAD3	SNX19
	GABBR1	FGFR4	PARP10	C1orf151.NBL1	ANKRD1	TBX21	HSH2D	ITFG3	ALDH3A1	LEP	KIAA1467		AP3B2	HIST1H2BC	PYROXD1	LOC100272216	APPL1	LOC729513	FBP1			POPDC3	WIPF3	NDRG1	UBE3C
	SRRM2	GIMAP8	SNRPA	IQCB1	MAP1B	CST7	TAGAP	DHRS11	EFHB	RAB9A	LOC100130890		CXCL10	KCNRG	DNM3	NFATC2	PFN1P2	RPAIN	LSP1			PODXL2	CBR3.AS1	PCDHB4	SGCB
	ZNF335	ADARB1	PHPT1	CCDC85C	DAAM2	TRAT1	TXK	FAM82A2	FABP4	QSOX1	TTC23		TIAM2	POU5F1P3	EVPLL	ZNF57	FAM199X	PPM1N	NCF2			C20orf54	CILP2	MLXIP	ANTXR2
	NLRP1	ECE1	ARFRP1	C8orf40	SLC35C1	SH2D1B	PIK3CG	PCCB	CTSF	PTGDS	FLJ42709		GCFC1.AS1	TRPM3	TLE6	CD3EAP	C5orf42	G0S2	CD84			P2RX6	CHRAC1	SCMH1	PLEKHM3
	INTS3	TSPAN13	U2AF1	MT1F	SRPX2	IL2RB	PTPLAD2	SGK2	KIAA1755	EPB42	STXBP4		TRPM6	MAPK8IP2	LOC158376	HCAR3	PCDH18	TRIM41	SLAMF8			CLPTM1L	C4A	KLF13	GHR
	DCUN1D2	PDZD4	ATP5I	RPL36A.HNRNPH2	SYTL4	ATP2A3	SEMA4D	MFSD3	MSH5	PPP2R2C	RSPO3		LOC100133920	PPFIBP2	TTC13	LOC100093631	ZNF699	LOC100507433	TTYH3			C10orf90	MRPS18C	LRIG2	CDC42BPA
	PHRF1	TPD52L1	NPRL2	HSD17B8	CRY1	KCNA3	CLEC5A	UQCRQ	METTL21B	AOX1	SPTBN2		SPDYE7P	C12orf68	ALDH5A1	LOC100131067	SHPRH	TRIM45	GLIPR1			ORMDL2	C4B	PRIMA1	NDUFS1
	INTU	PTP4A3	HRAS	ZNF773		FKBP8	RNF149	ELOVL3	YPEL1	AKR1C1	DHFR		ANKDD1A	LOXHD1	RBP4	ZNF219	ASXL2	SNHG7	ATP6AP1			TXNL4A	LPAL2	ZNF532	UBE2H
	MPP3	PILRB	DUS1L	NTRK3		ITGB7	SNCA	POLN	IL34	RTKN2	WDR92		MEF2BNB.MEF2B		TLE2	ST7L	ZNF24	GPR56	TYROBP			RHBDL2	PLA2G2A	LOC100130899	ADIPOQ
	CDAN1	ADCK3	GTPBP6	GOLGA8DP		GZMB	GBP5	TKT	PLCXD3	MSL3P1	MEST		BTN3A2			CYP4F35P	MED13	AGAP6	IL4I1			MRPL52	COL16A1	TRAF6	ADRBK2
	HCN3	MYO7B	LRRC45	NTPCR		GPR171	CLECL1	PCDH17	ZNF286A	SLC36A2	CCDC125		FLJ45340			PET112	TNPO1	SETMAR	SH3BGRL3			PPP2R4	SUMF2	SMARCA1	O3FAR1
	UCKL1	C2CD4C	BRAT1	FRG1		SBK1	C16orf54	C1orf56	OVGP1	CYB561	SLC47A1		CYP1A2			PNMA2	ALS2CR8	POLM	SIGLEC9			MINOS1	PRC1	SSB	ZC3H7B
	KCTD13	DLGAP3	AIP	PDCD1LG2		ABHD12B	KCNJ15	PPAP2A	C19orf29.AS1	CTNNAL1	CES1P1		SLC16A4			UBE2D4	TTC37	NOTCH4	CCDC88A			RANGAP1	C11orf52	IRS2	NFIX
	CFLAR	PYROXD2	EGFL8	CCBE1		ITGA2B	TMEM154	TSPAN3	EFHC1	SNAP25	UNC5B		BAG3			LOC100616668	ANKRD50	SCRN2	ATF3			NMB	LINC00514	KANSL1L	COPS2
	TRIM52	CD300LG	CAPN10	MRPS6		MYL4	NCF1	ALDH9A1	C1QTNF9B.AS1	TINF2	KANSL1.AS1		IQSEC3			PRR5	MKLN1	FKRP	TBC1D2					PDE3A	HSDL2
	GRB14	LDB2	MPST	CRISPLD2		SLC38A1	SEPT6	QDPR	EPS8L2	MAGED1	ROCK1P1		PPA1			LOC100287042	NBPF10	ZNF23	MAPKAPK3					MORC4	LAMA4
	TBC1D17	JAM2	SYMPK	MT1M		NRGN	TLR6	RETSAT	SLC39A4	LOC344887	GNB3		WIPI1			CDC42EP2	IKZF5	H1FX	LY96					LARP6	APOOL
	PLXNB1	HSPA12B	CDK9	USP32P1		CYSLTR2	AP1S2	HMBS	DIO3OS	RND3	CCDC74A		WNT2B			AKR1B15	BPTF	PPP1R14A	LRRC25					SKI	HLCS
	HIF3A	SULF2	NOSIP	CD34		FAM46C	RUNX3	MRPS33	FAM122C	GNA14	C13orf15		PCDHGB1			LINC00482	KLHL11	AMY2B	GRN					OSBPL6	AHCYL2
	PPT2.EGFL8	GTF2IRD1	MOB2	RDH13		PDZK1IP1	HSPA6	LBP	CPT1A	EEF1E1	ABR		STK17B			CEACAM21	REV3L	CLEC1A	DUSP2					PPP2R3A	EYS
	FRMD1	COQ6	GPS1	INO80B.WBP1		PF4	IL1R2	NDUFAF4	IMPA2	NUP188	ELANE		TMEM138			DNALI1	PIK3CA	LOC100129722	FCER1G					ATXN7	SPTBN1
	TSC2	ANKRD29	C1orf159	RAET1E		APBA2	IRF1	C6orf108	PLA2G4B	ENPP5	CLEC4G		MAP1LC3B2			ZNF2	DNAJB14	PLA2G6	GLA					C2orf91	QKI
	FAM214A	SPTBN4	RABAC1	MMRN1		PPBP	EFHC2	C8orf55		E2F1	PPP1R3G		MYOM2			B3GNT1	SMCHD1	FAAH	PLD3					BNC2	RNASEH1
	CCDC147	PLEKHA7	BAD	FSIP2		CCDC64	ADAM28	MYCBP		HNRNPAB	MBOAT1		LOC100861402			LOC388387	OSBPL8	VIPR1	ARRB2					CLSTN2	FAM168B
	MSH5.SAPCD1	ITGB4	HEXDC	FAM117A		HBA2	CEACAM4	PDXK		ADAMTS4	SP5		MYBBP1A			RBM19	ROCK1	KLHL17	SLC6A12					PFKFB3	VLDLR
	WHAMMP3	SLC9A5	PICK1	EFNA3		TNFRSF10C	CX3CR1	APLNR		SELP	FKBP1A.SDCBP2		MAP6			IGF2	LPP	SHC2	ATP1B1					BCL9L	LAMC1
	SMARCC2	TAP2	PRKD2	SLC26A1		F2RL1	ASGR2	RDH5		LDLR	CLEC2B		DIRC3			ZNF814	IL6ST	DMPK	FAM96A					TMEM183A	KIF13A
	RERE	GDPD5	NDUFS7	LOC100131551		HOXA11	HLA.DOB	ATP5J		IRAK1	FAM65C		COPG1			LRGUK	TBCEL	KLHL22	FAIM3					PERP	WASF3
	FAM13A	PTPRN2	TMEM86B	MUTED.TXNDC5		CHST5	IL21R	DECR1		SQSTM1	HAAO					OSGIN1	ZNF704	SDR39U1	SLC37A2					TOM1L1	PALMD
	MOCS1	FN3K	WHSC2	CYP4V2		KDM5B.AS1	TNFRSF9	COX5A		ABCC1	PPM1M					SLIT1	CLOCK		EMILIN2					TIMP3	CAT
	HOXA6	HYAL1	DPP7	ECT2L		ZNF573	SLCO4C1	FAM167B		COL6A1	MT1E					SLC25A18	KIAA0232		AQP9					TMEM100	ENTPD5
	WBP1	APOLD1	FBXW5	E2F5		GZMA	TSPAN5	C11orf51		SERPINH1	STMN3					DUSP8	FRS2		MYD88					TSPYL1	WNK1
	LOC100270804	CRYBB2P1	SLC25A29	LOC100125556		LTK	LY75	MLEC		OGFOD1	FAM22A					LOC389765	FAM73A		ITGA3					SMURF1	LIMCH1
	RTEL1.TNFRSF6B	NLRC5	COQ4	OLAH		THEMIS	SGK3	MN1		MFAP3L	MICA					ARHGEF4	CHD9		C5AR1					PCDHGA4	FAM115A
	C6orf141	ICAM2	NARFL	RGPD1		MCOLN2	ADAM19	ATP2C1		C1GALT1	GSN					OTUD6A	BDP1		SLC26A11					ARHGAP10	THRB
	WDR60	LAMA3	GLI4	EGFL6		APOBEC3D	PARP14	LETM1		NLN	EYA1					LOC284454	ZNF292		TNFRSF11A					ZNF417	PBX1
	ZNF76	ALDH1L1	XAB2	ATG9B		C9orf116	FBN2	ZNF503.AS2		OPRK1	PLEKHA6					C21orf15	MAN1A2		P2RX4					ZNF844	UBE2W
	GIPR	E2F6	KAT2A	GRIA3		REC8	SPDYE8P	ATP5J2		SLC12A2	CABLES2					HSPB6	PBRM1		LOC283050					ARHGEF9	KCND2
	GSDMB	ADRA2C	DDX56	LOC399753		NELL2	ERMN	KLHL25		C3orf80	NENF					PIGZ	PRKCA		MMP19					DLG5	WDPCP
	LOC728752	LINC00085	TSPAN4	MRO		MZB1	FAM26F	TPST2		FLNC	ISLR					PRHOXNB	LRP6		TNFAIP8L2					FHL1	NAALADL2
	GATAD1	NOS3	DNAJC4	MGC2752		LOC729683	SEMA4A	ATP6V0E2		COBL	RPL34					LOC151009	MPP7		CCR5					MTTP	IFNAR1
	FBXO17	MYO10	TSSC4	MEIS3P1		C21orf7	SIGLEC10	SURF1		LURAP1L	YDJC					CASQ1	PTER		CTSD					KLF5	YWHAG
	RGL3	LRRC8A	TRMT61A	C3orf33		PLAC8	CDA	LOC400236		THAP7.AS1	RPL36A					CCDC40	ZBED6		TM7SF4					PROKR1	SIAE
	CEP95	MST1R	AGER	DDIT4		EOMES	LGALS2	LAMB3		SLC38A4	IL11RA					LOC100507547	LTN1		BCAT1					TRIM56	NCOA4
	MYO5C	KCTD1	TOMM6	ADAMTS14		LOC653501	DOCK8	OR7E91P		TMEM156	PIWIL4					MGC39372	MIB1		PI4K2A					FAM114A1	ST13
	FLJ31306	CYP46A1	WDR74	NPB		KIF21B	MRE11A	PTGES2		DLGAP4						TMEM93	RSC1A1		GDF15					PRSS12	GNAL
	MOGS	NUDT14	CHMP2A	PDE10A		GPRC5C	LOC100505746	PLK2		ZFAT						SNORA8	ZNF81		CAP1					ACER2	IGSF1
	ZNF251	PLEKHH1	FIS1	CD38		MTRNR2L6	ZNF845	FAHD1		GJD3						LRP3	KAT2B		IQGAP2					TRIO	COL8A1
	DAPK2	NEDD9	ZGPAT	MCART1		MTRNR2L2	RAP1GAP2	DEFB1		SULT1A1						HRASLS	DENND4A		NLRC4					ZCCHC4	ODZ3
	PAN2	LOC285359	RGL2	CHRM3		MTRNR2L1	NLRP12	UQCR11		TNFRSF11B						GIPC1	KIAA1109		SLC38A6					TMEM150C	CD164
	FBRSL1	CX3CL1	CCDC130	PLXNA2		NKG7	RGS14	CD93		PPP1R9A						NELF	CPSF6		CD86					ICK	SATB2
	EFS	LY6K	C19orf70	ANKRD20A8P		COPG2	KCNC3	PEX11A		LOC100507634						NR2F1	ZFHX4		PTPN6					CADM1	DLG2
	NUP107	EFNB2	RBM5	FKBP9L		SCARNA15	FAM179A	ZBTB7B		NRCAM						SCN11A	RORA		CHST11					BRIP1	MARC2
	HSF4	LOC100270746	CCM2	MAGED4B		CTLA4	NCF1C	ADAMTSL2		LOC219731						BTBD6	ATXN1		FKBP15					DAAM1	MAP9
	FLJ14186	ZNF781	PPP1R35	SH2D4A		FFAR2	GALC	SPC25		OAF						HEPN1	ZFC3H1		GPC4					RGNEF	GLRB
	CORO6	NSUN5	NDUFB7	MAP1LC3C		LOC388588	FLJ35282	ELMOD3		FAM151A						LPIN3	ITSN2		LRRC33					ZNF92	PTPN13
	DNHD1	CHN1	NPDC1	DGCR11		MTRNR2L8	CHD1L	APOL1		ART5						SNPH	DENND5B		LOC100506585					SEPT14	TLN1
	PM20D1	LOC553103	COPE	PTCHD3		PDE7A	FAM35B2	TUBG1		ANK3						CITED4	PRKAR2A		SPINT1					BACE1.AS	AOC3
	NLGN2	NRG2	C19orf6	TNFRSF10A		OR7E14P	MEFV	COLEC11		INMT						PISD	XPO1		CD83					ADD3	NUDT4
	IGSF8	UNC119	WDR85	CCDC36		ANO9	APAF1	PCK1		RHOH						HEXIM1	CD302		LGALS9					INSR	IPO7
	PKD1P1	GJA4	ODF3B	MATN3		ZNF670	SNORA52	ARHGDIG		SMYD2						ZSWIM7	AVPR1A		DHRS9					EGFLAM	DCUN1D5
	AMT	BMP2	TRA2A	HPS5		TARP	NPHS1	USMG5		CSMD2						TNFRSF25	RBM43		ARPC3					LOC285084	C7orf41
	ANKRD53	PROK1	CYHR1	NEXN		CD8A	LOC286467	RAD51D		C10orf111						PSPH	GLCE		KIAA0930					PMS2P4	FOXO1
	MAN2A2	SSPO	MAP1LC3A	SPRY4		SLC9B1	MANEAL	RTN3		PDE1A						CMBL	PHF20		HCST					EPS8	NAP1L2
	SGK223	CEP250	CLK2	LIN28A		GZMM	SMA5	C2orf43		PVRIG						CCDC86	UBXN7		GALNT6					TATDN3	CAV1
	LOC100288123	C2orf84	TYK2	NPNT		LRG1	RPS10P7	BANK1		PNMAL2						LMCD1	ZNF521		SMS					FOXO3	HCAR1
	MAP3K6	CPAMD8	CIB1	LOC100652759		HOPX	SLC24A4	DPRX		LSG1						TFE3	RB1		COL22A1					ADAM1	ACADSB
	GATS	SMAGP	SLC26A6	LOC339166		PRKCZ	CCDC163P	PTRH1		STK39						KLC2	GALNT4		CD300A					TFDP2	LDOC1L
	GSC	ABHD14B	SH3GLB2	TEP1		NAMPT	SPATA13	MRPL53		NPTXR						PIR	PDZD8		EMP3					TSTD1	CLCN3
	FAM160A2	RILP	ULK3	MACF1		UBD	FAM90A1	DOK5		NALCN						MEF2BNB	GABPA		GNA15					TGFBR3	VCL
	TSKU	PECAM1	NDUFB10	SRP19		RUNX2	GPRASP2	DBX2		ANKRD30B						C17orf89	ASCC3		RASL11B					ADH1A	ERBB4
	ZNF490	VEGFC	RFNG	FLJ35390		LOC100288428	PPAPDC1B	ADRA2A		BST1						KIAA0284	SMAD5		GOLGA7B					HSPB7	GOLGA4
	SYDE1	BTN3A1	TNFRSF4	PCDHB8		CCT6B	PCDHB19P	PLOD1		CALB2						EPHX1	CAPN7		ASF1B					TPRG1L	LIG4
	FBXO31	TPO	MRPS26	ZNF334		FASLG	FAM117B	LDHB		LOC646168						LAMB2	BRAF		MYO9B					LOC729603	SNN
	NXF1	ACTN4	CCDC84	ZFP57		GZMK	SYT15	LOC100144603		CYTL1						ALDOA	FRMD6		TBXAS1					ZNF431	IQCG
	HOXB4	SMOC2	CLK3	TRIM16		GLRX	RGPD2	SMAD6		LOC96610						UBE2G2	MAB21L3		SLC28A3					CDON	ECM2
	HSPB2	C1QTNF9	NDUFA13	BTBD19		C1orf106	VPREB3	TBC1D24		OXCT2						NUDT5	ZBTB38		CA2					PRKCD	CCDC75
	ITPKC	RASL11A	SRRT	H6PD		POU2AF1	SGOL1	PCBP3		ZNF682						LPHN1	PRKAR1A		RNASE6					LRP11	ABCC9
	TFAP4	CLEC14A	MRPS34	LOC256880		TSNAX.DISC1	LOC100306975	AMOT		ERAP2						LZTR1	FUBP1		RIN3					LOC100129550	TMEM192
	ZNF862	NDUFV3	ETV2	METTL20		PTPN20A	C4orf21	PDHX		C5orf63						LRRN2	ASTN2		SPOCD1					PPFIBP1	TGOLN2
	ZNF276	SOX17	NUPR1	KIAA1919		PTPN20B	RASA4P	HP		FOXF1						PANX2	TTC3		PIK3R5					ZDHHC9	SDHC
	LINC00265	TRIB2	CRIP2	TBCE		HIST2H2BF	RETN	ABCB8		FAM60A						PLEKHG3	BRWD1		MMP7					SCN7A	ZHX2
	PI4KAP1	KIAA0664	GSDMD	CHMP4C		ITIH4	ZNF415	SCLY		CCDC113						COL11A2	ZNF791		C6orf115					LOC100505815	NCKAP1
	DCHS1	NYNRIN	RAB4B	LOC440894		ANK1	RAB15	ECH1		HERC2P2						ADRA1B	RECQL		RHOG					C1QTNF3.AMACR	ZNF518B
	RAB2B	IGLL5	PQBP1	CNTN4		ZNF557	FUT6	HSPE1		SALL1						LOC284412	SMG1		PYCARD					LOC100859930	ASPA
	ZNF182	SGCA	PPP2R3B	ITIH5		GTPBP5	ZNF385D	TTC39A		ACE2						ABCB6	PRKDC		APOBR					DIRC2	NR1D2
	AAAS	PLN	TCEB2	JRK		SNX22	JAG1	C1orf53		FAM74A1						PPP2R5B	GFRA1		GUSB					MCOLN3	LPHN2
	PAN3	RAMP2	FAM73B	CRTAP		ZNF808	LOC729264	COX5B		ADCY3						PNPLA2	CNTN1		CDCA5					FAM175A	CHMP3
	LUC7L2	THTPA	MPG	LOC100131691		ZNF124	MGC14436	BOK		TOMM5						MMP28	CELF2		CLN6					RANBP3L	ANKRD46
	TAOK2	ST6GALNAC1	TMEM205	NME6		FRAT2	AICDA	FXYD6		FCGR1B							CPD		ARPC1B					HECTD2	ZKSCAN2
	VSIG10	SIGLEC16	TCEA2	SEMA4F		ANKRD22	CD82	FAH		CYP2B7P1							KIAA1432		ALDH3B1					EXPH5	SERINC1
	INO80E	TTC16	VAMP5	NQO1		CSF2RA	C1orf210	H19		NETO1							ACAP2		RGS10					ARHGAP24	PEAK1
	MAP7D3	GIPC3	ZNF787	HSPG2		CPB1	FAM66E	HHLA2		PLCXD1							AKAP11		CLIC1					ERBB3	FNTB
	TMEM198B	GAS2	CENPT	FAM26E		MTRNR2L10	MTX2	TMEM132A		SPIN2A							REST		CECR1					KALRN	HBS1L
	LOC286367	IDO1	MRPS21	MYO18B		CD79B	NOS2	FAM203A		ETS2							ATP7A		LOC154092					C11orf93	TYRO3
	CUL9	SLC16A11	ZNF513	ANXA1		PIR.FIGF	ELN	MRAS		BTN3A3							BROX		CTSS					DIS3L	TBCK
	MZF1	C14orf180	TBCB	LYNX1		HAR1A	C9orf40	LYRM1		CBWD1							KLF3		TREML1					PTPN14	FBXL17
	BCL6	PLVAP	RPS6KB2	ARL17A		C17orf76.AS1	MCF2L2	PMS2P5		TTC39C							MOB1B		KIF11					C16orf88	ANKRD5
	NPIP	LCN6	SAP25	PFAS		ZNF419	LOC100287616	GCSH		RINL							SECISBP2L		DOPEY2					MAGED4	DYNLT3
	MLXIPL	HIST1H2BK	MYEOV2	PKI55		SLC2A1	CBWD5	FAM101B		PDXP							LOC641298		HAVCR2					C5	NUBPL
	PGAM2	GRB7	PIDD	TSTD2		CD40LG	STEAP4	COX7C		PVR							DDR2		GSTO1					ZDHHC21	PCDHGA10
	PACSIN1	CROCCP2	SLC26A10	SYT2		GSG1	C2orf27A	FLYWCH2		MTRNR2L4							BOD1L		LILRB3					ZNF280C	SUCNR1
	HOXA5	CMTM8	ARHGEF1	POFUT1		SERF1A	SLC29A4	C4orf33		PPA2							ZNF217		MYOZ1					CDKN2AIP	VPRBP
	IMPDH1	SAA4	UBXN1	TBC1D9B		CHRNE	CRYZ	LINC00184		MSRA							CREB1		CALM3					ZMYM1	DOCK1
	PPP1R3E	PCGF2	SGSM3	PEA15		ATF7IP2	ZNRD1.AS1	PIK3R3		GOLGA8IP							LOC647979		CCL3					LOC728606	STARD13
	GON4L	SCHIP1	TMEM161A	BBS5		C19orf33	TUBGCP5	GPLD1		AGMAT							SETBP1		CMTM7					KIAA1244	BIVM.ERCC5
	LINC00174	NEURL1B	LIME1	ADAT1		HECW2	GUSBP4	SEPW1		NPTX2							PCNX		MS4A6E					ZNF625	INVS
	ACACB	AREG	C9orf3	BVES		ZNF587B	PCDHA4	BDH1		XKR8							KCND3		TFEC					GLDN	HINT3
	PTBP2	HGC6.3	EXOSC5	SIX4		MYLK.AS1	BCR	FRAS1		STAC2							ITGA1		WDR1					CYS1	TAF1B
	MYH3	ATP1B2	C17orf70	ZNF28		CBS	VENTX	OLFML2A		ZNF80							USP24		GMIP					ZNF713	MDFIC
	MED12	SCARB1	COX4I1	FXN		SPATA7	GPC3	DFFA		LOC283174							FRYL		LILRB4					KIAA0922	PTPLB
	MLLT4	EPHX2	UBA7	COL12A1		PCDHB16	CCDC148	FKBP4		SAMD9L							RPS6KA3		MMP9					SLITRK2	RNF11
	RGL4	PAAF1	ASPSCR1	SSH1		PLAC2	EFHD1	LOC100134868		LTBP4							HEATR1		NFKBIE					HSD11B1	CLDN2
	RALGDS	SSU72	TRABD	ZNF703		DOC2B	FBLN5	HIATL2		REPS2							KLF12		SYK					FAM115C	CPS1
	TBX6	AGXT2L2	RAB24	SAMD4A		PTCH1	TCF7L1	ACOT4		DCLRE1C							LOC100294145		GPSM3					RASSF3	KIAA0100
	IFT172	WFIKKN1	APBB3	ICMT		LPHN3	ALDH4A1	LOC100505687		ZNF137P							NHSL2		ATG7					SEMA3E	SFXN1
	MUC4	OPLAH	CHCHD5	ZNF225		ZNF850	KIAA0355	TMEM45A		KRT222							SUV39H2		NUSAP1					SNX29	SGCD
	PIP5K1A	FGD5	PNKP	LOC100133091		TMX2.CTNND1	PALM	MFRP		IQCJ.SCHIP1							ZNF816		CHI3L1					TAF1A	NTM
	SLC22A17	ARMS2	SSR4	TBC1D16		PTPRD	LOC100131089	PDIA2		LOC285696							PIK3C2A		ST18					KDR	FITM2
	FAM113B	C1QTNF9B	TSTA3	C17orf51		REM1	METTL4	HEPACAM		ABCC8							SEL1L		CCRL2					PCDHGA11	DOCK7
	NOL3	REEP1	ANAPC11	PCDHGB6		C4orf32	KCNJ8	ACTA2		WDSUB1							PRKG1		SLC45A3					TMEM212	KIF16B
	GBA2	PC	SPAG7	FREM1		ZNF823	HOXC5	SLC25A16		NCAM2							HCG11		PTTG1					PPM1K	NET1
	SNRNP70	GATSL3	PPFIA3	KCNA4		FAM21C	PDZRN3	NKD2		TAS2R20							MCTP2		PRAM1					SP9	SSPN
	MPL	RNFT2	C17orf56	SORT1		ZNF677		ANKHD1.EIF4EBP3		UBE2Q2P2							CCDC50		EFHD2					EDA	PCDHGB7
	CRIPAK	ZNF658B	SIRT7	RFFL		PGA5		LOC100506368		ANXA3							MOB1A		BCL2A1					PKIA	LRBA
	COLQ	NPRL3	NTHL1	QRSL1		C21orf62		DERL3		MAP3K5							DPY19L4		PPT1					ZC2HC1A	ITGB1
	LOC202781	USP18	DVL1	C2CD4D		SMO		ADI1		ADCY5							DYNC2H1		ARHGAP30					SLC2A10	KLHL8
	TRO	KCNJ11	PUS1	EPDR1		LEPR		SFRP2		PNMA6C							TRPS1		C3AR1					SPRY2	MSI2
	LY6G5B	LOC100302401	DAPK3	BTBD11		NSA2		SMUG1		PGPEP1							LIN7A		NFAM1					P2RY14	TM7SF3
	TMEM191B	MYH9	SIGIRR	UGGT1		NOTCH3		CALM1		ABCC2							CAMSAP2		STK10					LRRK2	ACADM
	LOC100289230	RMRP	CDK10			FSBP		FBLN2		CYP4B1							LPIN2		UHRF1					C10orf10	TMEM167A
	PDXDC2P	IL32	AGAP3			PCDHGB3		PHYHIP		LOC100129931							SLC26A2		NAGK					SYDE2	RNF141
	PHLDB1	NXN	EXD3			PGA3		C5orf65		CISH							ATAD2B		SLAMF9					KIT	ERAP1
	IRX6	CD151	PKIG			LOC100128750		C8orf4		PPIEL							PRICKLE1		KCTD5					PPFIA2	SCN4B
	DNAJC18	HCP5	PRR24			FLCN		LINGO1		LOC154761							NIPAL2		SGK1					ARRDC3	PDP2
	LRRC66	ARHGEF37	MRPL4			MFGE8		FMOD		KCNA6							IPO5		TOP2A					XG	CANX
	KLHL3	AKT1	CCDC94			OR2A7		LDHC		LOC100506990							PIKFYVE		TRIM14					PPARA	GPR124
	HECTD3	DKFZp779M0652	AURKAIP1			PCDHB14		PMEPA1		PPEF2							XRN1		CENPE					RHOB	ARHGEF5
	METTL5	BCRP2	COMMD4			DZANK1		NUDT7		SLC9A4							DDI2		USP2					LAMA2	HIPK2
	ATG4D	PRIC285	TMEM134			C8orf44.SGK3		DDX11L2		ZNF20							C1orf168		ATP6V0D2					TYW5	TSPAN31
	SRSF5	NDRG4	MRPL38			UQCRHL		TMEM54		BAALC							DPYD		C11orf75					ZNF302	GRSF1
	BCL2L2.PABPN1	ORMDL1	FAM207A			FAS		SLC25A33		TSHZ3							IFT80		TGFB1					FAM70A	TYW3
	COPS7B	LOC645431	PPP1R16A			LHPP		MSRB2		IAPP							EIF2AK2		LMNB1					B4GALNT4	FAM82B
	WASH7P	FIGNL2	NDUFS8			PLEKHA8P1		NDST1		ACVR2A							PTAR1		MNDA					SLC6A15	ATL2
	HIRIP3	EPHX4	C17orf61			NDRG3		THSD1		TUB							LRP4		CKS2					PRKG2	UTRN
	RUSC2	BACE2	RHOD			C1QL3		DUSP6		CNRIP1							CCDC39		HS3ST2					PCDHGA5	RGL1
	LOC100507032	ATP6V1C2	ZNF524			HSCB		ABHD15		RAPGEF4							NDFIP1		SEC14L2					NOMO3	PEX13
	CIC	SHROOM1	POLRMT			SEPT5		PCDHB3		ZNF718							CFH		CATSPER1					TYW1B	C11orf54
	TUSC5	LOC283683	NDUFA11			BRD3		LOC285540		LOC100506083							FAM13B		SFXN3					DBP	EXOC5
	FBXW4	LOC100499405	IFT27			CTAGE4		ADRA1D		CEP68							PLCL2		EMR2					CMTM1	PTPN3
	WTIP	B4GALNT1	DRAP1			SAMD5		EMCN		EMP2							REXO1L1		C1orf38					CDCA7L	PIGM
	AHCTF1	SAMM50	PSMC5			NSL1		FUT8		FRA10AC1							TXNDC16		PARVG					AADAC	TM9SF2
	ZNF133	POLD2	FAM113A			ATG10		NECAB2		PRH1.PRR4							CERS6		MS4A4A					FAM102A	TPPP
	MEIS1	ABHD4	NEIL1			GPR63		NBPF3		TMEM37							TMEM30A		KCNJ5					CDC42EP1	MARCH8
	PLEKHF1	MESP1	C10orf116			GJA9.MYCBP		FAM24B.CUZD1		LOC100505676							DNM3OS		C2					TRIB1	IMPAD1
	PER1	C17orf72	ROMO1			HSP90AB1		ACTG2		EPN2							ARL5B		PHLDA1					PRR18	SELT
	CCL16	RHOXF1	ECI1			RUNDC3B		TMEM182		RXRA							GMCL1		TPK1					FDPS	DENND5A
	NCRUPAR	CACNA1H	HIP1R			PTENP1		NAPSB		SLC25A42							ST8SIA1		FPR3					TNFRSF10D	COCH
	MAFK	EPHB4	LMF2			SH3RF3		LRR1		KIAA1456							RFX7		VSIG4					CCDC92	HIGD1A
	IP6K2	ASPG	TMEM175			SCAMP4		ABCC6P1		TTN							HEATR5A		CTSL1					NRARP	COL4A3BP
	RBM25	KIF25	ZFYVE19			PCDHGC3		AGRN		ATP1A1OS							ZNF644		ITGAM					TESK1	ALDH6A1
	DRD4	ZNF323	TMEM44			PLXNB2		TMEM155		BDAG1							ZKSCAN1		SOWAHD					LOC100506994	PTGR1
	GLTSCR1	GATA6	CLPP			CYFIP1		TRHDE		AUH							MYCBP2		SH3BP1					ACTR3C	FTO
	CRAMP1L	F2RL3	CDC25B			ORC6		ACOT1		SH3BP5							FOXN2		NCAPH					MEGF9	C5orf30
	LOC100128071	WBSCR27	DCXR			SMPDL3A		LAIR2		BDNF.AS1							NEGR1		SLC17A9					PDGFA	ESYT1
	MCF2L	ARHGAP23	ARL2			NIPA1		HIST1H2BD		LOC100271836							C15orf38		CCNB2					BATF2	ANKRD40
	AFG3L1P	PCDHA3	DNAJC17					FDPSL2A		IRF4							GDA		CYTH4					NDUFA6	PTPN4
	MGC27345	TMEM184A	OVCA2					PCDHGA1		RUFY2							LOC389834		IGF2BP3					GCAT	SMN1
	PEAR1	ATP6V1G2.DDX39B	ALKBH6					FLJ46361		ZNF300P1							TET2		SNX24					DYSF	THSD7B
	NCKAP5L	FZD8	FIZ1					PIGF		TTF1							YES1		HCK					LTF	NKAIN2
	TEN1.CDK3	CECR5.AS1	UBL5					AP1S3		HOMEZ							ZXDB		ARAP1					ARNTL	ABCA8
	BAZ2A	CSMD1	RASIP1					WNT5A		GRIP1							GSK3B		CD97					LDHD	MTHFD1
	SOD3	FAM171A1	ARPC4.TTLL3					CYP2C9		WARS2							C14orf118		NCS1					RAD51	BCHE
	FLJ30403	HSPE1.MOB4	RHPN1					PRR7		KIAA1239							ZBTB10		ASPHD1					KIAA0101	MFSD9
	LOC646471	DHRS1	PSMB3					RGS16		ABAT							ELK3		RBM47					SERGEF	NUDT15
	ZNF767	C15orf52	PTH1R					NPC1L1		MPPED2							SCD5		CD9					CERKL	SEC23A
	DHRS12	RERGL	CHKA					LOC541471		DSG2							AGL		MKI67					RCAN2	SNAPC3
	GPR146	NFIL3	HDGFRP2					TMEM238		LOC643837							SPIN4		EVI2B					VEGFA	IGIP
	LOC648740	CARNS1	MIF					SCARNA9		KCNIP2							FGD4		CTSH					PREB	HSP90AA1
	FAM166A	SOX12	TAF10					LYRM2		STXBP6							SAMD8		PTPN7					FAM166B	EIF4E3
	ZNF783	PMS2L2	SDHAF1					FBXL13		ZNF559.ZNF177							RECK		IRF5					UGT1A6	PXK
	LOC619207	INGX	LOC146880					S100B		CFD							CYBRD1		WAS					HYAL3	KIF3B
	RHBDL1	HBZ	NOD1					WDR31		ZNF236							VPS13A		HSD3B7					TOP1P1	ADRA1A
	MKNK1	LRRC10B	SIX5					ZNF883		PRSS16							C11orf92		ADAP2					FAM84A	SFRP1
	SETD1B	C19orf35	RNF207					ZNF462		TMEM159							VPS13C		GPNMB					RPP40	CEP104
	GOLGA8A	DDTL	C7orf59					RNF182		ZNF510							PVRL3		SLC16A10					GPT	AFF2
	NPIPL3	SORBS2	TNFRSF14					SLC1A1		ZNF324							ADCY2		TIAM1					CDC42EP3	KPNA6
	MAGEL2	UNC45B	GRAMD1A					POTEM		RNF112							SLC46A1		LILRA2					HYLS1	PXDN
	KIFC2	SEMA5B	LYPLA2					DNAJC6		MOB3B							IGSF10		C11orf82					AP1S1	RRAGD
	MSS51	BMX	RNF181					LMLN		KLHL24							RNF19A		CCDC109B					LOC654342	DLD
	SMPD3	COQ10A	E4F1					KCNE4		EIF4B							ZNF117		CDCA8					RASAL3	FGFR1
	LOC100130451	DYX1C1	GDPD3					FOXP2		MKX							NBEA		RRM2					FLJ41200	FGFRL1
	MOG	HEY1	TRAPPC5					CERS4		PLEKHA5							PGAP1		CCL7					EGR1	BCL2L2
	C7orf63	GSTT2	MRPL23					AHI1		MDFI							RASSF8		HPGDS					LEPREL4	IPP
	SEC31B	ROR2	LIMS2					FCER2		NPHP3							KITLG		DFNA5					PSMG3	PCSK5
	FLJ13197	SFR1	C19orf25					LYPD1		MAOB							C12orf35		GNPDA1					TRPM2	METTL2A
	CDK11A	LOC100131096	DNAH17					ZKSCAN4		HIP1							C6orf72		BUB1B					MMAB	PDE4DIP
	IL17RC	WWC1	AKAP17A					DEPTOR		PCMTD1							MPHOSPH9		PIP4K2A					BCYRN1	HIBADH
	SCN4A	FOSL2	DDX39A					DDX11		PRRG3							ATP8A1		DOCK5					DLEC1	HIVEP3
	TP53I13	ZNF154	CPLX1					CA5B		TMEM220							SIGLEC6		FAM78A					RASSF4	FAM190B
	ASXL1	LMO2	NADSYN1					FAM149A		C2CD2							ERCC4		TFRC					UAP1L1	TULP4
	DBF4B	ZNF90	RPS9					KDSR		PLAGL1							POLR2M		DOCK2					BRI3	TG
	CBFA2T3	PTPRVP	ETFB					ATP8B2		HADH							ACVR1		SPINT2					CCDC48	SLC16A2
	HOXC9	CDC42EP4	FBXL15					TMSB15A		MOCS2							TMOD2		EVL					ABCA7	EIF4A2
	POU6F1	PCDHB18	BCS1L					CHRNA5		AUTS2							C21orf91		C20orf26					CARS	VPS41
	KBTBD12	C8orf84	BLOC1S1					DNAJC27.AS1		PER3							ZNF658		MFSD1					CKMT1B	MGLL
	CEBPD	GABRB3	THAP7					CACNA1F		PODN							SLC9A7P1		SAMSN1					LOC728431	PCDH7
	LOC100505576	SNORA24	ZNHIT2					PCSK6		RHOT1							RAPGEF6		IL2RG					VKORC1	TMEM164
	MT1X	LOC100129917	LRCH4					WNT11		RTN1							ZNF595		AIF1					RARA	TCF4
	KIAA0895L	ITM2C	NAPRT1					C4orf26		SCAI							SOS1		ACTR3					IFI27L1	GREB1L
	SLC7A6OS	RPL39L	SIVA1					SNORA40		CORO2B							SIGLEC8		CHST15					RRS1	CHURC1
	ULK4	IRAK3	PEX16					USP53		CIB2							ZNF555		ESCO2					MARCKSL1	EDEM3
	L3MBTL1	FZD2	DCST2					LIFR		STK24							SLFN5		CARD9					FCN3	PHKB
	TBP	IL1R1	NPFF					LOC285965		PRKAR2B							RPL23AP53		OSBPL3					ADPRH	AXIN2
	C16orf53	LOC100506023	SOLH					LOC100288181		PPP1R26							FAM208B		HLA.DMB					FAM86FP	TNRC6B
	ENTPD4	SLC31A2	CROCC					IRX1		PHF13							ATP1B4		CDK18					NR4A2	SLC46A3
	MIB2	FIGNL1	POLR2L					ZNF880		SPSB1							SLC35F5		KMO					HES6	PIK3CB
	GUCA1B	LRRC37A2	NDOR1					NPHP4		PHF10							CAST		IL1RN					ASS1	GALNT13
	PAPD7	LOC387647	ZNHIT1					TRIM22		RNASE4							ZNF780B		TUBA1B					BCL3	SLC41A1
	BAI1	BMPER	PPOX					ZNF519									MGAT4A		TDRD6					LOC100507392	TCEANC2
	TAL1	RFC2	ADRM1					LEFTY1									RBPJ		SHCBP1					NETO2	CCPG1
	CBFA2T2	CAPN5	GUK1					PRR16									VAMP4		ETHE1					DLX5	KCNAB1
	ENOSF1	LOC100286793	RAB40C					EDNRB									FKBP7		STMN1					FRMD8	SEP15
	LOC401320	RNF121	COX6B1					MRGPRX3									PHACTR3		ZYX					REEP6	TACC2
	CA4	CD1E	DECR2					HYDIN									AEBP2		OSCAR					UBL4B	EPHA3
	ACAP3	RNF222	ATAD3B					LOC400958									GVINP1		PLEKHO1					FAM46B	NNAT
	C5orf4	PLA2G5	MXD3					C17orf57									NDNF		ANLN					ZNF443	SUCLA2
	CYP4X1	LOC729678	TAF1C					PPIL3									TBC1D4		ATP6V0D1					ACOT7	DIP2C
	LOC541473	RPL23AP7	PAM16					DPYSL3									NAPEPLD		CDKN3					DNLZ	FNDC3B
	C19orf12	FAM21A	CRYGS					MCM3AP.AS1									SEC1		FUCA1					WDR34	ZFP64
	C9orf68	TMEM176B	CIDEC					GPR89B									FLJ45445		PTPRE					FSCN1	IGF1
	PLEKHG2	FAM27A	TIMM13					KLF4									LINC00260		CHST13					RPS26	KAL1
	TTC32	SYTL2	MOK					UBE2QL1									ZNF714		LCP2					HLX	CS
	PARP2	CCDC152	SPPL2B					TEKT4									SLITRK4		SLC9A7					RBM38	C4orf3
	LOC84856	ZNF721	HLA.F					ZNF585B									ZNF764		TNNI2					ICAM3	GPR34
	LOC728323	ADAMTS2	PIN1					ELL2									ZNF790		LOC283143					GCH1	TNFRSF21
	LRP1B	PDE1B	MST1					KHNYN									LOC100132287		HMGA1					TALDO1	AMIGO1
	LOC572558	NTNG1	NOVA2					MFSD4									LOC100132062		RTN4R					SERTAD1	COL6A6
	ADAM11	FBXO4	CUTA					RPLP0P2									SVIL		S100A11					KRT18	ZNF626
	LOC100128593	IPCEF1	CHKB					NTN4									LOC100133161		ADORA3					SLC25A39	MBNL2
	C10orf107	ZNF320	POU5F1B					DDAH1									SLC38A11		GPR137B					SLC25A19	MYEF2
	MUC20	CD1C	PRRT1					FYN									GCC2		AOAH					PNPLA6	PCOLCE2
	EFEMP2	ANKS1B	RPLP2					CBLN3									STYX		RAD51AP1					ARMC5	TGFBR2
	UNKL	METTL15	CLDN5					C20orf118									STOX2		IQGAP3					THOC6	CDK19
	SRSF11	PDLIM3	SPRN					SDHAP1									TC2N		CSK					MLLT10P1	SMARCA2
	RCL1	DCLK3	COX6A1					ADAMTSL4									DPY19L2P4		SLA					LOC100505495	ZNF423
	USP13	CYP27C1	DTX3					C8orf73									GPR82		ACP2					STK32C	APIP
	BMP6	THOC3	FDX1L					KREMEN1									LRRC34		MOSPD1					MVK	SLC16A7
	BCL7A	ORC1	JOSD2					CYP2D6									DACT3		RASGRF1					SLC27A3	MYLIP
	FLJ43681	KAZALD1	HP07349					RAB33B									SCN3A		KIAA1598					RRP9	STX11
	LOC100128288	CCP110	CCDC101					TP53INP1									ATP5J2.PTCD1		SLC43A3					MCOLN1	KIAA1161
	AHSA2	NCOA7	C19orf79					TSC22D3									ZNF84		SIGLEC7					SRA1	AK4
	LINC00202	PAX8	C1orf35					ZNF548									NUPL1		ABCG2					RENBP	DAND5
	PHF17	LOC100132273	NDUFA7					CDC14B									ZNF430		VAV1					PDLIM1	ELOVL2
	LAMA5	ZNF85	FAM132A					THSD1P1									SNORA4		PKM2					RNASEH2A	TAF8
	MAPRE3	PCDHB10	ISYNA1					NAV2									MPV17L		CD37					TBC1D7	NOS1AP
	FAM41C	CDH11	CAPN3					MAK									POM121L4P		TTC39B					LOC145820	AGTR1
	MKNK2	C6orf25	COASY					TSC22D1.AS1									SHOX		TMEM86A					HCFC1R1	NLGN4X
	ATHL1	CEP19	CCDC56					SNHG6									LOC100233156		TBC1D8					TPM2	SYNPO
	ABCA9	PARP8	PSME2					NXPH3									DNM1P46		TGFA					ENG	PPP2R1B
	DFNB31	KCNA2	NUDT8					AQP6									TRIM4		DMXL2					DNASE2	FNDC5
	NECAB3	B3GALNT1	NDUFS5					ARMC10									RASGRF2		M6PR					SAT1	SCUBE1
	CAHM	GTF2H2	NSUN5P1					CBLB									C14orf39		CNPY3					ATAD3A	LIX1L
	RNF144A	ATP10A	GPX4					SESTD1									CCDC73		MAFB					SLC22A18AS	FUT2
	ERRFI1	MYOZ3	FKBP2					C6									SKIV2L2		PPM1E					APOL2	AP3S2
	HEBP2	SERPINA5	AP4M1					TRAPPC2P1									LOC151475		CALHM2					H2AFX	ATP2A2
	KIAA1274	MOSPD2	ZNF444					RPS6KA6									CXCL9		BUB1					OSBP2	MPDZ
	POLR2J4	ZNF254	SAFB2					SOX9									IRX5		ASPM					S100A2	HOXC8
	SLFN13	PDE5A	PHF1					FLJ42102									ZFP30		CD163					ZC3HC1	PPP1R12B
	C21orf63	PRDM8	FAM3A					UGGT2									GYS2		ID2					TIMM10	CREG1
	NBPF16	RASGRP4	BOLA2					CACNB1									FCER1A		STX4					HOMER3	FIGN
	COX14	POSTN	BOLA2B					KIF5C									SRL		CENPF					CHCHD10	DGKI
	ZNF841	ZNF780A	ZNF692					LOC284581									ZNF138		LHFPL2					RNASEK	RASA3
	CBX7	STK32B	CHST1					ZFP36L1									LRRC4B		GPR84					HSPB1	SLC9A9
	ME3	LOXL3	MZT2B					CCDC146									CEP44		C19orf38					ATP5E	PPP1R1B
	MT1L	GXYLT1	FAM69B					ZNF83									ELTD1		TM4SF19.TCTEX1D2					SNRNP25	CETN4P
	PER2	CXCR2P1	PRICKLE4					PMP22									SYNDIG1		CDC45					LY86.AS1	METTL2B
	GUSBP11	DGKG	LZTS2					SIPA1L1									RRN3P2		UBASH3B					FBXW9	TWIST2
	LOC642846	SLC16A12	NDUFB11					ASAP3									ATXN3		BIRC5					UROS	OR7E2P
	NOX4	BIRC7	NUDT22					GLB1L2									PCDHB7		P2RX1					NAGLU	TMED7.TICAM2
	ADH1B	ASPN	FBXO46					SLC6A2									DLEU2		RAB11FIP4					SEPX1	LANCL1
	SOX13	PLXNA3	C19orf60					MFAP2									C1orf140		SLC16A6					SPATA2L	ARHGAP21
	PABPN1	CCBP2	FHOD1					CTBP2									ZBTB7C		RNASET2					FAM162A	DYNC1I1
	TNRC6C	FNDC1	MRPL41					RHOBTB1									LAMP3		SRC					RABGGTA	LINC00478
	ZP1	FAT4	IDUA					HMGB2									CCDC165		TK1					NT5DC2	FAT1
	ABCA10	DDHD1	PGLS					MTR									CHI3L2		NRIP3					RNF122	SLIT2
	CDC14C	SLC12A6	ATP6V1B1					ZDHHC18									PLEKHA8		C15orf27					C11orf48	MAP4
	GPR83	FAM40B	COX4I2					LOC100507217									PBX3		PRPS2					CST3	NRIP1
	LOC401052	ADM2	TRAPPC2L					LOC400043									FHL5		RBP5					YIF1B	HEG1
	DIP2A	HEPH	MIIP					SLC38A2									CEP135		PLCB2					NR4A1	MAP2K1
	BMP8A	CENPQ	PI4KAP2					STX7									KCNS3		PMFBP1					MYL6	TMEM209
	INHBB	FAM49A	IFT43					LOC100131564									ETFA		PDE6G					IFI35	PARK2
	TTC18	VTA1	EPN1					SLC13A3									VIPR2		MADD					NOP16	ZSCAN12
	ACOX2	LOC100506190	WASH2P					PLSCR4									LOC643623		SRGN					CTSA	MEF2C
	KIAA0226	LIF	NPEPL1					FLJ10661									MTHFS		FABP5					ADAT3	SCN2B
	MTHFSD	CADM3	CISD3					HLF									GJB2		LILRA3					TRAPPC1	DHFRL1
	PKD1	CHD3	TBKBP1					MTMR3									C9orf174		MYBL2					TEN1	AKT2
	FBXL8	CA13	NT5C					VIM									OPRL1		GPR65					PARVB	C9orf41
	GPIHBP1	DIO2	HSD17B1					GTF2IRD2									MGRN1		DLGAP5					C16orf91	ZNF470
	PRRT2	FAP	VARS2					AKNA									FAM72D		SPP1					CYP11A1	DCBLD1
	PKDCC	GNL3L	C3orf78					ZBTB24									AP1M2		CD276					TMEM180	LMX1A
	C21orf58	SPAG17	SMARCD3					INPP5F									HIST2H2BC		MYO5A					B3GALT6	PCDHA10
	HOXA4	RALGPS2	CCNL1					PRKRIR									ZNF155		PLA2G15					APOA1BP	ENPEP
	BOLA1	RAB23	OCEL1					PLXNB3									ARMCX5		FAM110A					SIL1	PARVA
	TRPV1	HTR2B	SFTPB					EVC2									HR		NLRP3					LMAN2	ACSL1
	ZSCAN18	TXNDC5	VPS37B					MAST2									FAM95B1		HMMR					SDSL	GPR64
	RASL10B	FAM18B2.CDRT4	NDUFS3					DSC2									PRSS35		CELSR1					BCAT2	LOC728377
	FP588	TRAM2	EIF4EBP1					SERPING1									HIST1H4J		TPM3					TXNDC17	RAB7L1
	MINK1	ETV5	FOXRED1					FST									DTX4		RARRES1					BOP1	PPP3R1
	PRR12	CA3	TST					PCK2									PDZK1		KIFC1					ROGDI	SHISA6
	FAM184A	TNFSF13B	ZMIZ2					FGFBP2									LOC650368		WIPF1					PTK2B	UBQLN1
	LMF1	FECH	TREX1					IDS									PCDHGC5		ZNF710					TFPT	PPP2CB
	TMEM74B	C8orf22	TMEM219					TCF19									IL17RE		MAN2B1					VASP	ABCD2
	PTPRS	ANGPTL1	PCBP4					FAM198A									LOC100292680		SLC22A16					SDF2L1	EMX2OS
	RALGAPA2	HPSE2	GBAP1					ZFP36L2									ZNF815		RGS19					FAM195A	HNRNPH3
	LOC338799	BAI2	KIF17					OSBPL9									SCXA		C1QC					DTYMK	THAP2
	ZNF337	LPPR4	MTX1					SLC23A2									SCXB		HPS3					ZDHHC12	TMEM200A
	IQCC	PLXDC1	C6orf226					PRR3									GPR172A		ARL11					CCDC167	OR7E12P
	STARD9	PRG4	NOSTRIN					C16orf45									CTU2		SIGLEC15					UBE2S	SKA2
	LOC645212	PCDHAC1	MYO15B					SEMA3A									ACOX3		HM13					RBX1	ARG2
	ANKRD20A5P	GSTCD	GLTPD1					ANKRD36B									CIDECP		KIF20A					GAPDH	TBC1D9
	XAF1	CRLF1	SNAPC4					TCEA3									LYSMD4		TSPAN33					ITPA	TNS3
	CDKN1C	C1QTNF3	CELF6					ENPP2									DTX2		DEPDC1					MRPL17	SIK3
	RPGR	RAP2A	PVRL2					ZNF449									MT1DP		GNB4					ASGR1	ZNF208
	ABHD14A	FGL2	C19orf43					CLIP4									LOC90499		TTK					ATP6V1F	VSTM4
	MAGI1	TLR7	ZNF593					MXI1									TMEM17		SOAT1					MNF1	LOC401010
	PTPRB	RCAN3	PRDX5					ABCB11									FSTL3		SLC2A9					ATP5G1	PNMA1
	MAN2C1	ANK2	MRPL12					LDB1									LY6H		SCIMP					PTRHD1	PARD3
	AGAP5	GPR150	PCSK4					L3MBTL4									NIT2		ARHGAP22					GALE	FAM18B1
	VAMP1	ABI1	CEP164					PIK3IP1									ANKLE1		DPEP2					MRPS24	PCCA
	FAM76A	SLC31A1	CDK2AP2					PDK4									LOC100505967		CEP55					NDUFB9	CPEB1
	ST7.AS1	RAB31	PHKG2					SPATA6									MSC		EIF4A1					TXNRD2	LOC100329109
	PDK2	REL	BCAP31														DBNDD1		SH3BGRL					LAMTOR2	FMNL2
	ZNF700	BICC1	RFXANK														SNX15		GINS1					PFN1	AKAP1
	PCDH11X	MICAL2	C1orf63														NEK8		ZNF267					LSM4	EFHA2
	PRSS50	RELN	HIST2H2AA3														TAX1BP3		KCNK3					TMEM208	LOC100131655
	CIDEA	ABCB4	HIST2H2AA4														C16orf89		SH2B3					FARSA	ZNF778
	TNFSF12	HMGCLL1	C11orf35														AIPL1		MYO1F					CDK5	SLC35B4
	TSC1	RPAP3	SIPA1														PRELID2		APOC1					MRPS12	SEZ6
	ADSSL1	NEU3	LGALS1														ENDOG		MFHAS1					PPIB	TMBIM1
	ABCB9	SPPL2A	CEACAM19														ZNF433		AKR1B1					FIBP	ZNF587
	CALCOCO2	FAM3C	KIAA1984														DMRT3		PLBD1					RHOC	SRCAP
	ABO	HIF1A	NXNL1														GSDMA		GTSE1					TMEM141	MAPK10
	WDR83	ADCY7	ACADVL														NUDT18		IFITM10					C19orf24	GNE
	ZNF333	ATP2B1	YJEFN3														MGC72080		S1PR3					TIMM8B	OR51E1
	MLL2	AGPS	HAGH														TMEM160		LAT2					C12orf44	PHGDH
	LOC100506649	FMO1	FLJ20021														CHST2		CYB5R4					BSCL2	HHIP
	LOC100130581	SDC2	PACSIN3														QRICH2		CSTB					CMC2	RFTN1
	LOC678655	SERPINB8	OBSL1														ZNF544		PRKCB					ECE2	AAK1
	CNTFR	BEND6	HEATR7A														SNORA44		AURKB					S100A16	SGCG
	LOC440300	SRP72	TMUB1														RHBDD3		LYZ					ATOX1	RNF8
	ZNF500	LPAR1	U2AF1L4														MOV10		EVI2A					C9orf16	CHP
	INCA1	ABHD2	C21orf2														PSMD8		PLEKHB2					NCLN	FHDC1
	NSUN5P2	PRKACB	C1orf86														JMJD5		PLAU					AP2S1	HK2
	TSNARE1	CSGALNACT2	TMEM120A														C7orf43		TIMP1						C8orf80
	ADHFE1	FAM126A	HINT2														HTRA1		RAB38						NFAT5
	LOC100289561	PSD3	ZRSR2														MED8		RAP2B						PCDHGB5
	WASH5P	SGPP1	PRR22														MORC2.AS1		SLC1A4						D4S234E
	LTB4R		C12orf57														SRM		RHOF						SYPL2
	ZFPM1		AK1														COMT		NUF2						KIF5B
	PLD6		GRAP														RABL2B		SLC11A1						TFAM
	FARP2		HSF1														MYL9		DNAJC5B						APOL4
	GPX3		PFDN2														CAPNS1		CRABP2						FDFT1
	ZNF865		NDUFS6														RPP38		RELT						ID4
	KCNQ4		TONSL														PTCD1		GNA13						NFIC
	LONRF1		PTDSS2														POR		NANS						MYOC
	LOC100133331		ANKZF1														SWSAP1		B3GNT2						STK35
	DNAH6		FAM195B														FADS3		MS4A7						DUSP16
	TMEM8B		ROBO3														TMPRSS5		SNAPC2						LINC00094
	ABCA6		SH2D3C														CYTH2		ALOX15B						LONRF2
	LOC100272228		MED15														INPP1		MMP12						RAPGEF2
	RFPL3.AS1		C7orf50														CEL		HTRA4						ARHGAP31
	ZMYM5		METRN														TAGLN		PSTPIP1						PJA1
	NFE2L1		TELO2														HMOX2		LY9						C14orf43
	RBM28		SAFB														MGMT		GBA						CRYAB
	WHAMMP2		ACADS														TRADD		TMEM123						FANCC
	GTF2IRD2B		DENND4B														TCN2		KIF23						LOC100133991
	RARRES2		FAM108A1														TMEM214		PFKFB4						SLC7A6
	TXNIP		DPM2														CLIP3		TFCP2L1						UVRAG
	TSPAN15		COMTD1														GRK5		ATP1A1						LOX
	C19orf54		CCDC154														SULT1A3		PGBD5						FRMD4A
	PSCA		ASMTL														SULT1A4		KCNK6						LOC100287015
	EEF2K		SIRT6														DDX55		SLC6A7						RPL23AP82
	LOC100506033		SFI1														CENPO		ZNF804A						LOC728613
	SLC7A10		GIT1														GPSM1		PLXNC1						RCCD1
	SLC1A7		RNASEH2C														B4GALT7		ABHD12						PCDHGA6
	CDIPT		SCRIB														CYR61		FCGR2A						SNTB2
	TLR9		WDR18														PCSK7		ANPEP						PDE11A
	MGC21881		PXN														KIAA0415		ACTG1						ERI2
	ZBTB16		NFKBIB														PPP2R3B.AS1		KBTBD8						GFRA3
	CNNM3		TMEM198														NAA10		IL10RA						TMC2
	CROCCP3		SLC2A4RG														MIEN1		GK						ZXDA
	C14orf149		FLJ11235														FAM100A		ARPC4						EIF4G3
	NEAT1		POMT1														EFCAB4A		RASGEF1B						STON1
	RNASE13		SPHK2														ZNF177		MYO1E						CYP39A1
	YBX2		MTIF3														TDRD10		GALNT7						SLC38A3
	CYP2E1		PSMB10														YIF1A		MREG						HIBCH
	AQP7P3		PPAN														FFAR3		CLEC4A						DNA2
	GTF2A1L		SLC27A1														ABCD1		ZWINT						NREP
	SHISA9		MRPL24														PPP4C		COQ2						NAV1
	BCO2		TMEM150A														ADAD2		CFL1						NMNAT2
	HLA.J		COX7A1														BSG		ATP6V0B						ANKRD30A
	ZNF74		KLKB1														EPOR		TLR8						TMEM184B
	TUBBP5		MXRA8														IL3RA		TRIM36						KRT19
	LTBP2		TRAP1														RABEP2		SLC36A1						LOC728989
	SLC29A2		TUBB8														RRAS		KIF4A						GAS2L2
	USP35		CPT1C														RRBP1		FAM20C						ZRANB2.AS1
	HYI		C11orf83														ACSS1		CAMK2B						ZNF737
	BZRAP1		LOC100288911														PRKCDBP		MILR1						C5orf62
	RHD		EXOSC4														H2AFJ		SLC39A11						TBRG1
	PHKG1		LMBR1L														MVP		SEPT9						POLR2J2
	KIF7		ABHD11														NOC4L		LILRA6						LOC388692
	KDM3A		JUP														LOC100188947		DEPDC1B						PRND
	LOC100630923		SF3B5														USE1		OTUB2						CACNB2
	ANKRD20A3		NDUFA8														RCN3		ACPP						CNTNAP3B
	LOC100130015		CHRD														CCDC124		MAP2K3						ARHGAP29
	C1QTNF1		CLDN15														CDK11B		KIF2C						FEZ1
	LOC100506124		LOC728743														LOC100134317		S100A6						ADCYAP1R1
	LRP5		C7orf53														LOC728392		OTOA						MPZL1
	LOC253039		RPUSD1														C15orf63		TMEM102						AGT
	PXDC1		LLGL2														NRN1L		MGAT1						ZNF253
	SLC27A2		TRAPPC12														SMTN		GPR77						GGT6
	AFAP1L1		LOC100288778														THAP8		SIRPB1						WWOX
	ZNF223		NOC2L																RSPO4						THUMPD3
	PM20D2		LOC389493																CAB39						SLC25A15
	PYHIN1		MRPL43																PAK1						PPAP2B
	PCDH11Y		TSNAXIP1																YPEL4						LRIG1
	LTBP3		MTG1																SEMA7A						ZBTB43
	MTERFD2		SWI5																CYP2S1						SUSD5
	BMP1		CHADL																TM6SF1						HNMT
	ZNF793		ENTPD6																UCP2						PCDHGB4
	NBPF9		IVNS1ABP																AGPAT9						PTCHD4
	TNFRSF10B		LRRC36																KLF16						ALDOB
	FBF1		C9orf172																MAD2L1						SLC29A1
	IL28RA		LOC150381																RASSF2						DNAJA4
	H2BFXP		ARHGEF16																KIAA0226L						C1orf226
	OPN4		ZNF205																FBXO41						ZDHHC11
	LOC100506123		SPIRE2																PBK						PCDHB11
	ADAM33		FBXL6																GPRIN3						LTBP1
	GK5		EFNA1																SAMHD1						CCZ1B
	KIF19		MYL6B																CDT1						TCFL5
	LINC00294		BCL6B																LY86						PPARGC1A
	LINC00092		MFSD10																FXYD5						CLDN16
	PITPNM2		BIN3																HAMP						FOXP4
	GRB10		LONP1																MFI2						DNAJB4
	LOC100216545		ANKRD54																IL18BP						LOC100133612
	ATOH8		BANF1																NRAS						RNF5
	DOM3Z		LRRC37B																PGM2L1						GTPBP10
	TMEM80		SYCE1																ESPL1						PTGDR2
	CACNB3		LOC113230																AKR1A1						SPRYD7
	ZNF577		METTL17																C11orf45						VN1R2
	NOL9		BCAM																FCGR3A						LOC642361
	MPZ		MRPL27																RAB39A						SLC2A11
	CCDC114		ASMTL.AS1																OPN3						BAG4
	TSC22D1		TTLL3																DIRAS1						PCDHB15
	LOC440434		GCDH																RNF128						FMN2
	DDX43		MBD3																PILRA						PTCH2
	ZNF554		ARHGAP27																C6orf192						LOC644961
	NOL12		PNKD																SERPINE1						LOC100293534
	KIAA1683		DGAT1																C14orf169						HCG22
	LOC100129269		ALDH16A1																SLCO2B1						PLEKHG1
	LMO3		THAP3																FTH1						STRBP
	SMOC1		GRASP																GLT25D1						PTGR2
	ARC		CCDC107																ACTB						C15orf38.AP3S2
	FAM178B		CPNE1																RAMP1						VSIG1
	NCAM1		IGHMBP2																BASP1						GTF2H2C
	SFTA1P		DUSP23																KCNE1						NR1D1
	ITGA10		DICER1.AS1																HMGB3						ZNF135
	COPZ2		SPG7																RAB13						PEX5L
	SMAD9		COX8A																P2RX7						CLVS1
	RAI2		ZNF688																C1orf127						PELI2
	HAPLN2		ACY1																LACTB						DPT
	TRIM66		C11orf67																PVRL4						PIGB
	ACR		LOC150776																TACC3						SLC25A32
	PPIP5K1		HSD17B10																DAPP1						IRX2
	LOC100289019		SEMA6B																ARPC2						SNORA21
	FTX		NDUFB1																PTCRA						FBXO48
	MEGF6		IFITM2																ST3GAL5						MACC1
	CCT6P1		PQLC1																PPP1CA						FLJ40852
	MTSS1L		C2orf55																CENPM						RNF212
	KLHDC1		GAS6																C1QB						GRAMD4
	FAM59B		CMAHP																SEL1L3						LRRTM2
	LRFN4		SCNN1D																TCIRG1						TMEM189.UBE2V1
	GALNTL4		ZNF511																CDCP1						FAM153C
	CBWD6		ROBO4																BLNK						LOC646999
	LOC284950		POMC																HS3ST1						LRRC32
	C9orf173		PDLIM7																IER5						PCDHGA7
	DFFB		ARVCF																ARMC9						ADAMTS6
	IRAK2		LSM7																C1orf96						NGFR
	STAG3L3		TTC21A																CMTM3						LINC00574
	ARMCX4		FBXO6																S100A4						TACR1
	HIGD1B		SYCE1L																HEATR3						DPEP3
	ZNF418		MIER2																BMF						NLRP2
	FHOD3		HOTAIRM1																DYRK2						LOC151174
	SCARF2		TGFB1I1																CLSTN3						HERC5
	C9orf100		SLX1A																LGALS3						SLC2A3
	OR7E156P		SLX1B																FAM64A						CHEK1
	LRP5L		BCAR1																TNFRSF1B						GLTP
	RAB4B.EGLN2		SLC25A35																MFSD2A						TRNP1
	PHKA1		DDT																RNASE2						ANGPT2
	CRYBB2		LOC100302650																TUBB3						TRIM59
	CAB39L		C8orf76																NAB2						PTH2R
	VWA3A		BAIAP2L1																C14orf109						LOC100506874
	ABLIM1		HDAC7																MICAL1						PCDHA6
	PIGL		BIN1																TWF2						LOC644714
	LOC399715		SIRT5																LILRB1						LOC440354
	PNLDC1		TBC1D3C																CD33						TMEM187
	BCL2L12		NNMT																FAM131B						GPR162
	MATN2		SAC3D1																GABRB2						MUC1
	EME2		SCGN																UBXN11						TMEM26
	RGMA		CLEC4F																UNC93B1						FAM13C
	MAP3K13		LCN10																DLX3						IL12RB1
	WDR27		HRC																SERPINB1						FOXP1
	FLJ42875		SNCG																CD1B						SYS1.DBNDD2
	ANG		MPZL2																UBE2C						ICAM4
	NDUFC2.KCTD14		CEMP1																FNDC4						FAM57A
	C11orf1		C11orf61																CPVL						RBM3
	TNNI1		C17orf65																PRSS36						GRAMD3
	TMEM200B		EXOC3L1																HCLS1						GBP3
	LRRC24		TPM1																P2RY11						WNT7B
	CITED2		SLX1A.SULT1A3																TMEM51						DIAPH3
	ADAMTS10		SLX1B.SULT1A4																DOK3						EDN1
	UNC5CL		PDE2A																FAM20A						SOCS3
	LOC646762		METTL11A																IKZF2						GUSBP1
	CASP10		CLDND2																TDRD3						KDELR3
	LPPR2		MRP63																CD63						FAM124A
	RFX1		PRSS30P																PTBP3						ZBTB3
	COL9A3		KIAA1875																MTHFD2						LOC653513
	RGPD5		LOC388242																PNP						AIMP2
	FBLN7		EXOC3L4																VNN1						SNAI1
	LTB4R2		C6orf1																PAPLN						LAMC2
	C1orf51		C3orf71																FCHO1						TNFAIP8L3
	ACSM5		CCL5																UTP18						HIST1H4K
	PPIL6		FAM43A																CDK1						SNHG5
	USP31		PRKRIP1																LTA4H						SOX18
	MAP3K8		TMEM204																PAQR8						HSD17B7P2
	ZNF761		CCDC137																HPSE						SLC9A3
	CSRP2		ARHGEF25																LGI2						C21orf56
	DENND2A		TNFRSF6B																SHANK1						SPATA22
	EHD1		TRAF4																CYBA						THBD
	LIMA1		NDUFAF3																FZD1						ZNF114
	LOC144571		ADA																CD4						SLC5A5
	TPT1-AS1		ENDOV																TRIM38						TCTEX1D2
	ZNF546		TRAPPC6A																CSF1R						MYCN
	GOLGA6L10		HOXD8																CYP1B1						AFMID
	DNAH2		ZNF747																GSG2						HIF1A.AS2
	ADH1C		LDB3																HSD17B14						FAM110D
	LOC145663		PAQR6																RAB20						FOXI2
	MLLT4.AS1		MYL5																ADORA2B						SOX4
	ANO1		FDXR																KCNJ1						C9orf7
	IL15RA		GIMAP1.GIMAP5																TMEM98						APOM
	TSIX		EIF3K																TRIM47						KRT16
	ZC3H3		FLYWCH1																FAM129B						SPDYE3
	KCNQ1OT1		NFATC4																HK1						MYLK3
	ULBP1		TNK2																RPP25						CCZ1
	MAP7D1		CPSF4																SIRPA						COL4A3
	AKR7L		NT5C3L																SQLE						LOC389634
	PIWIL2		SLC4A11																ATP6AP2						HSPA2
	LOC340037		NME2																TMED9						SLC25A34
	AGAP9		CCDC17																IL10RB						GPR37L1
	WISP2		TRPT1																ARHGAP11A						SNCAIP
	ZFP42		DENND3																AURKA						LOC389906
	SLC6A10P		MAP3K10																CDCA3						PRKAG2
	CNTNAP3		NAT14																ERP29						AKR7A3
	CUTC		BAIAP2L2																DOCK3						APOBEC3G
	AGAP8		HSPA7																FHAD1						PPP1R15A
	HOXB2		MRPS15																OXER1						PLA1A
	NACAD		CKB																MOXD1						ABLIM2
	SUGP2		HLA.A																NR4A3						C22orf34
	PHLDA3		FAM65A																TBC1D1						FAM181B
	ATP6AP1L		WDR90																CXorf26						KLHDC7B
	AHDC1		INO80C																IER5L						GJC2
	TAT		MRPL54																ADAMTS8						HHEX
	CEBPB		C6orf70																IKBKE						SLC2A8
	NUAK2		MAP3K11																GRIN2D						LOC284837
	INTS4L2		IZUMO4																CALR						CORO2A
	PSMC3IP		DLL1																SHKBP1						EPHA2
	TWIST1		TBC1D3F																COL6A2						RAD51L3.RFFL
	CYP21A1P		WASH3P																KLHL6						CD74
	HOXD.AS2		DGKQ																PAQR5						MYC
	EFCAB2		TMEM88																CMTM6						PPAN.P2RY11
	C7orf46		DDX26B																TPP1						LOC100288637
	C3orf35		ALKBH7																LINC00256A						HBEGF
	ASXL3		SPINK5																NCAPG						TBXA2R
	SIRT3		SDHAP3																FLVCR2						RPS6KA2
	UACA		TEX264																PANX1						FANCD2
	RUSC1.AS1		DHRS4L2																PPP1R18						TP53TG1
	RNF157		ING5																PKMYT1						EHBP1L1
	ZYG11A		ABHD16B																PLK1						C1orf228
	LOC283922		TUBG2																PSAP						FAM174B
	SYNE2		ENO3																ARSB						ZDHHC14
	FKBP5		STK36																CCNA2						LOC375295
	ANKRD13B		PLEKHJ1																E2F3						GPR68
	NUMBL		MDP1																PDIA4						PDIA5
	SLC15A1		TSKS																SDC4						GADD45B
	C8orf44		C16orf42																TUBA1A						LFNG
	NODAL		ATG16L2																CXorf21						PPP3CC
	CACNA1C		ECSIT																CENPK						HAPLN3
	BTN2A1		DYRK4																FANCA						AP4B1
	LOC440173		PAOX																SNAI3						GFAP
	TOX2		GSTZ1																MANBA						FAM86A
	NYAP1		PSMB9																SLC43A2						RPLP0
	SPINLW1		RBM14																GATM						JMJD7
	STX1B		LSR																TROAP						SARDH
	FAM106A		COX17																B3GNT8						CYP2D7P1
	ISM1		TPTE2P6																SETDB2						OLFM1
	SH3RF2		HIST1H1C																JAKMIP2						METRNL
	COL27A1		GADD45G																ADAMDEC1						DUSP5
	SOCS1		CHURC1.FNTB																CCL22						LGI1
	CELSR3		HOGA1																ZG16B						TAP1
	PNMA3		SBNO2																GALNT12						MLKL
	LAMA1		FUZ																PRR11						PDLIM2
	DNMT3A		CCDC74B																IGFLR1						DARC
	DDX12P		AVIL																FUT4						LHX6
	BOC		C7orf55																CYBB						CPXM1
	ZNF266		PIM3																BAIAP2						HOXA.AS5
	ASB6		MMP17																TNFSF15						SNORA27
	FLJ33360		AURKC																PTGS1						PTMA
	PDGFRL		RASGRP2																SLC39A8						CYGB
	AOC4		DFNB59																FAM105A						CCDC120
	ATG14		LOC613038																LYN						RNF166
	C1orf204		GNG11																NR1H3						HERC2P9
	FOXK1		CYP4Z1																TTYH2						RELL1
	ICA1L		AS3MT																SLC22A18						HLA.C
	WHAMM		HCG26																HAPLN4						CLDN11
	SNORA57		VWF																TET3						SNORA67
	SYCP2		LOC100507463																MARCKS						HSD17B7
	LOC100130557		CLIC3																HEXA						CHPF
	UPK3B		CEACAM8																ADAM9						IFFO1
	CNTNAP1		DOC2A																PTPRJ						ZNF211
	SOX8		RRN3P1																GAL						FXYD7
	IGF1R		LMOD1																PIPOX						MAP4K1
	ACCN3		APRT																PAQR4						CCDC88B
	LRMP		UFSP1																PPP1R9B						GBP2
	STAMBPL1		MRPL21																PLB1						GTPBP3
	AVP		RFX8																S1PR2						CXorf65
	TLR10		ACAD9																PTPN22						CPN2
	LINC00266.1		LOC100507424																ME2						PLCG2
	PITPNC1		PXMP2																RIPK3						APOE
	LOC100129387		ZNF837																PLEK2						TCEAL3
	GTF2IP1		ZNF580																RAB42						CNKSR3
	DPY19L1P1		AVPR2																TNC						PLIN3
	TMEM105		LOC255512																MMP8						FBLIM1
	MS4A10		LINC00116																MRC1						SLC24A6
	ZNF552		C20orf27																FAM214B						IGFBP2
	DMC1		RRN3P3																CECR6						MAFF
	ZNF483		PEX11G																TMSB4X						HRCT1
	LINC00339		ACVRL1																FAM213B						METTL7B
	METTL21A		SSBP4																PPAPDC1A						BCL2L1
	ZHX1.C8ORF76		LINC00471																FN1						CORO7
	CNKSR2		FCGR2C																CHIT1						RPSA
	HOXC4		MPV17L2																C1orf85						SLC50A1
	CES2		INHA																RIMS3						C10orf125
	RUNX1T1		TNNT3																PLXDC2						TAPBP
	LOC644242		C1orf122																SECTM1						TMEM97
	FLJ31662		N4BP3																JUNB						LENG9
	C15orf40		ARGLU1																FMNL1						LOC729234
	KIAA1731		SERHL2																IL17RA						TESC
	CCDC142		ZNF673																C1QA						LYL1
	RSPO1		SYCP2L																A1BG.AS1						ID1
	SIDT2		ITPRIP																RNF135						FLVCR1.AS1
	C17orf69		SERF2																GCNT1						ASRGL1
	PEX6		CCL14																NDC80						IER2
	NSUN6		LOC442421																METTL1						SYT12
	NT5DC3		PWWP2B																ACRBP						SCN1B
	SCIN		C9orf23																DIAPH1						FAM211B
	KCNA7		CPSF1																MS4A14						TNFRSF8
	FZD9		AGFG2																ACOT11						ID3
	ZFP36		C15orf57																ARHGDIB						SCO2
	LOC399744		CCR10																ZMYND15						ZNF232
	PACS1		TCF15																ETNK1						VWCE
	C1QTNF7		GSTM2																MARCH1						RAD9A
	TRAF5		RN45S																APOBEC3C						ARID5A
	ERVK13.1		KLHL35																GAA						TRIP13
	SMYD4		ARL16																C15orf48						RELB
	LOC401074		ENGASE																F5						PFKP
	ANKRD20A4		ABCA2																SAPCD2						CYTH1
	LOC401431		FBXO44																GNG5						FES
	KIAA1324		FOXH1																PADI2						ELL
	SKA1		CCHCR1																SLC6A6						BRSK1
	STX2		LOC386758																PRSS23						RPS2
	ZNF746		LOC100652768																GMPR						CDKN1A
	SPEG		GPAA1																SLC22A15						ICA1
	EIF5AL1		FUT1																H2AFY2						LOC100130776
	MUC6		TECR																SIGLECP3						STK11IP
	JPX		PQLC2																SMAP2						KIF22
	LOC100506054		MMP11																TNFAIP8L2.SCNM1						MTFP1
	PPT2		HMGN3																SHOX2						RPP21
	SPDYE6		POC1B.GALNT4																DENND1C						RHBDF2
	CLDN4		METTL21D																S100A3						ST3GAL6
	TEKT3		LPCAT4																FCGBP						DTL
	UCKL1.AS1		BREA2																INSM1						RPL28
	PAK6		MT1A																MS4A6A						FOXM1
	LOC100506963		C17orf61.PLSCR3																CD22						TMEM173
	GBP1P1		PCDHB5																AGPAT4						VAV2
	RASD1		SEMA3F																CHRNA1						RPL27A
	NAIP		PABPC1L																ARHGAP18						SF3A2
	LOC338817		GLYCTK																B3GNT5						GLTSCR2
	LOC729156		ATF4																PLK3						MAP3K12
	LOC285074		SPNS2																CD14						C11orf2
	GOLGA6L1		C16orf74																BACH1						HPCAL1
	DUS3L		FER1L4																MICB						SLC39A13
	LOC100127983		SEPT4																SLC7A5						FCHSD1
	RNF125		KRI1																SQRDL						SNHG9
	LINC00338		MEF2B																IGFBP4						ETV6
	TMEM2		SCNM1																LGMN						CLEC3B
	HERC2P3		C9orf103																LOC151534						PSRC1
	PABPC1P2		UBAP1L																TPM4						PDGFB
	SLCO4A1		ZFYVE28																CRIP1						GCHFR
	LOC100507331		ZNF541																HTR7						SGIP1
	LRRC37A3		GSTT2B																CR1						MANF
	NS3BP		PPP1R13L																BMP2K						TUBA4A
	FLJ39639		NBEAL2																CCNB1						NOXA1
	ANGPT4		DNASE1L3																ARRDC4						TNK1
	FAM86C1		DNASE1L2																LAMP1						DDX60L
	KLHL29		KCTD15																SRGAP3						SNHG12
	ZNF233		CRELD1																ITGA5						HMOX1
	NOTCH2NL		FAM189A2																CASS4						NUDT2
	COL5A3		LIMS3																CXADR						ZNFX1-AS1
	DOK6		LIMS3L																SLC20A1						ABI3
	LOC646719		PDE4C																GNGT2						RAB34
	SCUBE2		LOC283335																ETNK2						C16orf7
	LOC646851		ERF																G6PD						SLC3A2
	LMOD3		LOC100507246																AMDHD1						POC1A
	TRAF3IP2.AS1		CTSW																FLJ90757						RARRES3
	RRP7B		TMC4																MEI1						DCAF15
	MAPKBP1		TMEM178																GFRA2						GALT
	WSB1		ALKBH4																ADRA2B						LEPRE1
	IRGQ		C18orf34																ADTRP						CPT1B
	CUBN		YBEY																LILRB2						RTEL1
	TTPAL		LOC728855																TPX2						ARRDC2
	ITGB3BP		STAT4																APLP2						STRA13
	RABL5		KIAA1407																MCM5						ITGAE
	FCAR		CAPN12																IL6R						PRG2
	SLC25A5.AS1		SDHAP2																FTL						PRPF6
	POM121L9P		CSRNP1																TNFSF8						C17orf49
	C5orf38		ACBD4																PABPC4						ATP13A1
	NFKBIZ		DNASE1																COL9A2						KIFC3
	DUOX2		MDK																MR1						CA11
	HCG4		SCNN1B																DAGLA						FAM100B
	GPR112		IL6																SSX2IP						TRAPPC4
	APCDD1		MAMLD1																EGR3						ANKRD37
	TNFSF10		C1orf229																MGAT4B						SPHK1
	GHRLOS		PIP5KL1																GCNT2						PLCB3
	PKP2		ST20																LONRF3						ST6GALNAC4
	BPHL		PLGLB1																CARD16						C19orf76
	SCML2		ZNF667																C7orf73						MFSD7
	CXorf23		RPSAP58																PKIB						PRMT1
	C4orf48		MEG3																TNFAIP6						PBX4
	1.2.SBSRNA4		RBM4B																PLEKHA4						ASL
	AGAP4		SLC25A10																THY1						PAFAH1B3
	HES4		ADAMTS1																USP6						MT2A
	AGAP7		TMC6																COTL1						DEF6
	C5orf45		PRODH																HJURP						CD72
	CLYBL		VWA1																MAF						ARHGAP15
	ARMC2		RPPH1																GBGT1						RASSF1
	C5orf27		NEURL2																RPL22L1						PSMB8
	POM121L1P		CRIP3																ATP6V0C						GSTP1
	EMX2		STAP2																TRERF1						FOSL1
	LOC100287722		KLHDC9																CLCF1						LRRC70
	MET		TRAF1																FAM111B						SORBS3
	TTC36		MRPL46																TMPRSS13						POLD1
	KANSL1		MRRF																MELK						CCDC57
	DKFZP586I1420		SS18L1																ADCK2						FXYD1
	KLF2		LOC388796																A1BG						FAM89B
	LOC728730		RBP1																ZNF765						SH3TC1
	LOC100132526		ITPR3																C10orf55						ADRBK1
	MDGA1		TRPM4																ELF4						RAB8A
	LRRC1		PLGLB2																PRKX						PFDN5
	TANC1		KLHDC4																LPAR5						SLC38A5
	ADAMTS7		ISY1																ORAI1						MYBPC3
	GRM6		BTNL8																ICAM1						LAT
	DSCAML1		ATP6V1G2																AMPD3						RRP1
	FOXC1		THYN1																FZD10						CBR3
	HIST2H4A		SAMD1																GPR39						RIN1
	HIST2H4B		CSRP1																PIK3R6						S100A13
	C17orf53		BLOC1S1.RDH5																TPMT						FAM125A
	LOC100506688		ARSA																WDR11						CBX8
	XRCC2		ALDH8A1																SLC11A2						IFI27L2
	MADCAM1		ADM																NUDT19						NCAPH2
	SYNPO2L		THNSL2																ADAP1						TIAF1
	KIAA1751		SPSB2																ITGAD						PPP1R14B
	ANKRD19P		GIMAP1																OLR1						MC1R
	KCNN2		FAM173A																RNH1						OSBPL10
	DLGAP1		HIGD2A																HLA.DMA						RECQL4
	ABCA11P		HLA.E																CCL13						ANKRD13D
	ZNF525		LOC100268168																CLEC11A						SGSH
	TRIM7		LOC100287314																SYNGR2						NUDT1
	DGKE		KIAA1530																PREX1						NMRAL1
	CSF1		TMEM163																TP53BP2						DGKZ
	SLC5A4		HPR																FOLR2						ARHGDIA
	LOC100507412		CXCL2																LPAR2						AP1G2
	ELOVL7		PTPN18																PITPNM1						STK19
	IL2RA		AATK																MSX2						DDB2
	DSCR6		LINC00311																BHLHE40						CORO1B
	LOC81691		NEK5																KLK4						RASSF7
	TGM2		WDR6																BCL10						GGT1
	DACH1		ENO2																MARCO						MAN1B1
	TUBD1		CLEC4GP1																RELL2						OGFR
	SKIL		MMP23B																DOT1L						EZH2
	A2MP1		LGALS4																C3orf14						SELM
	CLIC6		PLAC9																SNORA16A						ARHGAP4
	FAM72B		MAMDC4																DUSP18						MICALL2
	TRPC6		LINC00485																C2CD2L						TMEM91
	ARSD		CASP9																CCL24						RNPEPL1
	RAPH1		SPDYA																TYMP						POLD4
	GSTM5		RRAD																STAG3						UNC13D
	CYP2A6		TUBA8																C9orf167						IKBKG
	LOC100129716		TM4SF1																SCAMP5						HMG20B
	FAM124B		CLUAP1																TFEB						DAGLB
	ST6GAL2		DEXI																FCGRT						CHTF18
	PNMAL1		TTYH1																TP53I3						C17orf109
	BTN2A2		LOC100505761																DLG4						GMFG
	SIM2		FAM176B																STIP1						GNB2
	HLA.DOA		UPK3BL																LY6E						CHMP6
	CNTN3		HDHD3																VASN						BAX
	PCDHGA8		PRKAR1B																C13orf33						AGTRAP
	LRRC4C		ZNF683																LRRFIP1						C17orf59
	C11orf70		MST1P9																TLR5						USF1
	CCDC102B		STYXL1																FKBP10						GALK1
	CD96		TSPO																CDH23						NAGPA
	RNF103.CHMP3		PMF1.BGLAP																OAS1						PARP12
	SNHG8		C20orf112																PSD4						C9orf89
	CNGA1		BDH2																HMHA1						ZNRD1
	TMED10P1		LOC389705																VCAM1						MAD2L2
	ARNTL2		DIO3																SERINC2						UPP1
	ZFP112		IFT122																HLA.DRB1						STARD3
	RAB37		COL18A1																FARP1						NFKB2
	ITGA2		TEAD4																PTK6						TMSB10
	LYPLAL1		PHYHIPL																CASP1						GGA1
	SFXN4		SUSD2																ARHGAP25						BRMS1
	SH3PXD2A		LOC100506233																RUNX1
	KLRG1		CH25H																ABCC5
	PMM2		PRDM15																SH2B2
	INMT.FAM188B		ZNF238																CD109
	ENPP6		SNHG3																DAPK1
	ULK2		CTNS																KCNQ1
	SH3BP4		CACNA1A																SERTAD3
	CNTN2		SRPK3																C21orf67
	BTG1		LOC100131825																DNAJB5
	PMS2P1		GAS2L1																APOC2
	TDP1		EXOC3L2																MEX3B
	CCT8		C3orf25																SIRPB2
	BBOX1		TRIM50																MCM2
	HLA.DQB2		PLEC																EMILIN1
	NCDN		CATSPER2																UBE2L6
	KIAA0513		IL15																C15orf23
	ENDOD1		KLRC4.KLRK1																ARHGEF2
	CBWD2		DND1																PTK7
	DISP2		SNTA1																SLC35E3
	SRXN1		SEPT5.GP1BB																TDRD9
	NBPF11		LOC283663																ARAP2
	FREM2		CXCL1																CD274
	GIPC2		MYO18A																SIGLEC14
	KCTD12		LOC100240735																MLF1IP
	KRT17		LOC388152																TAGLN2
	AKR7A2		DNAJC30																SPN
	PRRG4		HOXD9																SIGLEC5
	PHLDA2		WDR65																ALDH1A2
	WFDC1		RAB3C																ANGPTL6
	ABHD14A.ACY1		SPATA20																FGD2
	CLU		GALNT14																ING2
	LOC100506012		C8orf82																CRYL1
	CHEK2		LGALS3BP																CXXC5
	FGF13		TNNI3K																KIAA1804
	RCC1		PPP1R10																MIDN
	GSTM1		RGS11																DUSP10
	MBOAT2		ZNF300																CDS1
	CCL21		ZNF497																EMR4P
	GTSF1		LRRC27																PLA2G2D
	KLHL7.AS1		ST6GALNAC2																ZNF385A
	PPP1R3C		SLC25A25																RCSD1
	ATP6V1D		C2CD4B																SH3BP2
	SLC12A8		EFNB3																POU2F2
	LSM5		ASNS																NIP7
	SAMD11		CDH24																ZNF589
	ST8SIA4		DUSP15																TPBG
	DAB2		FN3KRP																PCDHGA12
	GAP43		GAMT																IKBIP
	FLJ31485		GSTM4																C5orf20
	SLC5A3		TRIM67																NT5C2
	TSPAN12		LINC00152																MTHFR
	ZNF678		GAB3																TMEM150B
	TMEM170B		ARHGEF19																AKIP1
	SFXN2		CNN1																SMPD1
	OASL		RAMP3																HLA.DQA1
	LOC595101		SNHG1																SLC7A8
	KIAA0825		TOP1MT																FOS
	RFT1		THOC5																SNTB1
	FAM55C		STRC																FCGR2B
	CEP70		NCKIPSD																MPEG1
	MRGPRF		INS.IGF2																CCL4
	FAM210A		TTC38																MMP14
	LOC439994		OAZ3																LAYN
	DPP4		MORN4																LXN
	CCL19		CFI																FHL3
	HDAC9		APOD																TRIM34
	TP53INP2		CNN2																DNER
	C12orf75		CDHR3																IL4R
	ZNF283		TXNL4B																FAM72A
	METTL6		SLC44A5																PIGT
	MSX1		MST1P2																DRAM1
	LOC728554		ZNF579																BBC3
	RIMS2		LOC100506085																SEMA3G
	LAPTM4B		SDHA																APOBEC3B
	GRM7		SNORA45																LRRC8E
	DHRS4L1		HMGXB3																GREM1
	ISPD		GGH																HLA.DQB1
	EPHB3		C3orf15																C1QTNF6
	CHCHD2		ISLR2																HSPA1A
	MTHFD1L		KLRK1																SLC19A1
	MCM4		NRXN2																ZNF185
	ZNF708		TNNC2																PRDM1
	CRHBP		PTX3																CD209
	PPM1H		EIF3CL																NXF3
	IL18		CCDC85B																TES
	ACTN1		FAM86HP																CTSL2
	EPSTI1		HMGB3P1																ITGAL
	STK38L		SHISA3																HTRA3
	DYNLL1		FMO3																CDH12
	EHD4		LOC147727																EZR
	MLC1		ZNF428																E2F2
	LPAR6		PGF																CHST8
	MT1G		LOC80054																PDIA3P
	GPC1		TPGS1																YWHAH
	BRCA2		HRSP12																TMEM70
	TRIL		ZNF467																GGTA1P
	SYT1		POLR2J3																TYMS
	ATF5		ALPL																PRRX2
	IFIT3		SSH3																CCDC99
	ZMAT3		SERF2.C15ORF63																HLA.DRA
	KCNG1		LOC284865																BLOC1S2
	PDF		PARD6B																PLEKHG4
	SPRYD3		MEIS3																RAB3IL1
	HTATIP2		CASQ2																ZNF93
	COMMD3.BMI1		FAM150B																PEPD
	MCM8		SPR																C1orf233
	LOC285954		HERC2P4																CTSC
	CLDN23		BRWD1.IT2																NEK2
	DCHS2		ERCC1																FGD6
	ALDH1B1		GNAZ																LSAMP
	ARL4A		CHKB.CPT1B																ZNF668
	TPCN2		TBC1D3																IER3
	PRKAA2		TMEM41B																MAN2B2
	ACAT2		LMX1B																SEZ6L2
	FAM63B		MSTO2P																LOC285972
	NHLRC1		FAM188B																FCGR1A
	FAM86DP		LOC100133445																DISC1
	ANKRD65		TAPBPL																SLFN11
	MAP3K1		FCGR1C																HVCN1
	CBR1		PCDH12																TNFSF12.TNFSF13
	CD36		FLNB																RPSAP9
	CEP192		VSIG2																PLOD3
	ODC1		POLB																CHRNA7
	FAM83H		RILPL2																APOBEC3F
	HACL1		FLJ35024																B3GNT7
	LOXL2		ANKRD18B																IL8
	GPD1		BEX5																FJX1
	ANXA5		TPD52																ALOX5AP
	LOC90784		PLTP																ALDH1A3
	IL33		JUN																NANOG
	MCTP1		PAPL																APLN
	AQP3		LOC283731																SLAMF6
	OBFC2A		LOC730102																ADD2
	BCKDHB		LOC143666																KCP
	SFPQ		SLC44A4																LILRA1
	LOC100170939		MLPH																RASA4
	LRRC2		C10orf11																NDE1
	WISP1		C11orf96																HS6ST1
	CENPP		TF																IL10
	SDC1		LOC100132774																HEATR8
	LOC439990		ELFN1																ACSM3
	IFIT5		LOC100131320																LOC653786
	NIPA2		MMP24																CXCL3
	CNOT6L		GRAPL																CENPA
	GPR27		ANGPTL4																DENND2D
	LOC100506385		C1orf54																CDKN2A
	COL21A1		KIAA0040																SLC7A1
	SMA4		LOC100129148																OLFML3
	ZNF770		LOC100128398																C2orf89
	B2M		NDUFAF1																GOLGA6C
	RAB32		TLL1																MBP
	TUBB2B		ARGFX																TNFSF14
	LRRC59		SCGB1B2P																C9orf139
	DGKH		TRIM73																PRR5L
	COL5A1		TRIM74																EYA2
	ST3GAL2		ESPNL																CCL2
	LOC728190		ZDHHC8P1																SEC11C
	ATP5G3		LOC100505989																HAND2
	DDIT4L		OR7E37P																EBP
	C5orf64		GALNT3																ARL4C
	XRRA1		FAM84B																PDPN
	HSD17B12		SLX4																WDR76
	COX20		MESDC1																LRRN4CL
	LRRC8D		ZNF786																PPDPF
	DKK3		PCBD2																RAB11FIP1
	CXCL12		JMJD6																NPAS2
	RHOU		SGSM1																SIX2
	KRT7		GATA2																ACSF2
	CAPN6		CLDN7																LOC100130705
	LRP8		ZNF671																C3orf58
	PDGFD		KLRD1																EDA2R
	MOB4		FLJ44511																NR0B1
	KCNQ3		INPP5D																CDC6
	CDR2L		HHLA3																LEPREL2
	C19orf40		DNAH10																NINJ1
	LZTS1		SCARNA17																PYCR1
	TMC5		ANKRD24																TMEM176A
	DNAH14		PRCD																TNFAIP2
	PPID		FOSB																LAMC3
	RCOR2		MZT2A																GPR85
	YARS		CPNE5																CYP21A2
	HNRNPA1P10		MYL3																PLD4
	HSPH1		LOC643529																ATAD3C
	ACE		LOC727896																SIGLEC1
	NAV3		ACOT13																RIMBP3
	ENTPD1		WASH1																COMP
	CD200R1		TCF21																CLCNKB
	CLTA		TMOD1																HAS2.AS1
	CHRFAM7A		KHK																MERTK
	PPIL1		MAZ																C8orf45
	STXBP5		NME1.NME2																LILRB5
	FGF12		C9orf66																ANKRD16
	PEG10		PLCD1																STEAP3
	CHIC1		SUZ12P																CHAC1
	CENPBD1		RBP7																AHRR
	POGLUT1		WDR91																GPCPD1
	NACC1		HSPA1B																CCBL2
	AKAP6		ZP3																CENPL
	PPPDE1		C16orf5																BGN
	CD28		NFKBIA																CD58
	SERAC1		HSBP1L1																C16orf93
	CCND1		GRM2																GALR1
	ARHGEF3		PCDHA7																TCTN2
	RAI14		LOC100507034																RASL10A
	GLUD2		GBP1																ABHD11-AS1
	INPP4B		C10orf140																COL4A4
	FAIM		GOLGA6L9																NAAA
	SERPINB2		EFNB1																UGDH
	CSTA		ZNF296																HRH1
	NBEAL1		CCL17																S100A10
	CACNA2D1		GPR17																TGFB3
	OGFRL1		ZCCHC8																LIMS3.LOC440895
	TOMM40L		NKIRAS2																MYO1D
	DNAJA1		JUND																FANCI
	CKAP2		ZNF610																IGFBP6
	MMACHC		MID1IP1																SLC35F2
	TTC9		LOC100506686																PDE6B
	HN1		CDK3																C17orf77
	LPAR4		CYP4F12																CTNND2
	NUP155		CSDA																CCNF
	CASKIN1		ZNF771																LOC606724
	KPNA2		GGT5																NEB
	NPC1		KCNMB4																CYP1A1
	CDC42SE2		NXNL2																ALPK2
	SOWAHC		MALL																ICOSLG
	DCP2		FHL2																HLA.DPA1
	FLNA		FAM118A																CA12
	VDR		FRG1B																CLEC10A
	BCL11A		ZNF876P																LOC100505702
	FUCA2		DOCK4																MGP
	SLC25A5		TTLL12																DEFB124
	SRD5A3		TMSB15B																ARL4D
	TMEM104		PDZK1P1																SLC1A2
	CENPN		LOC646576																ZDHHC15
	P4HA1		ACSL6																TNFSF13
	PCBD1		USP32P2																RNF130
	SHB		C2orf74																ADAM23
	RHOA		PDE4B																DSTNP2
	KRAS		BDKRB2																LINGO3
	ERI1		SLC25A1																LOC339524
	USP46		KIAA1609																DUSP19
	B4GALT1		RBM14.RBM4																CMIP
	LAIR1		MAPK8IP1																HHIPL1
	COMMD2		DUSP1																ST5
	SUSD1		GRIP2																HSD11B2
	HSPA5		ZNF613																PCDHA9
	ACER3		PLCD3																PAX3
	GALNT2		TIMP4																SNORA72
	CORO1C		CIITA																LOC100506433
	RGS4		TMEM38A																CCL18
	KRT79		KCNJ14																PION
	COL3A1		FAM156B																C1orf95
	FGF7		RNASE1																SLC40A1
	TTC27		PSTPIP2																DNASE1L1
	TUBB		SAPCD1																NUDT6
	SCARB2		NBL1																HIST3H2A
	AHCY		ADH4																TMEM79
	SEC61A1		SCNN1A																HLA.G
	PAICS		TMEM221																GALNS
	GLIPR2		EEF1E1.MUTED																ZNF615
	SLC25A20		ANP32A.IT1																RAB27A
	C2orf88		KLHL14																TMEM130
	SLC39A10		SH3BGR																TMEM191A
	SLC41A2		ANKRD9																VASH1
	SHMT2		MYRIP																CLGN
	ABCC4		LLGL1																CASP8
	PRNP		ZNF563																C2orf63
	MSMO1		LOC643733																IGSF9
	CDK6		LOC728024																LOC284889
	LAP3		ESRRG																WARS
	EIF4E		POM121L10P																LOC645752
	SERPINE2		RASD2																LOXL1
	PDIA6		RABL2A																TMEM191C
	HSPA8		ATP8B1																GUSBP3
	ANO5		LTC4S																ITGB8
	ACAA2		GPAT2																CD163L1
	TUBA1C		ZEB2.AS1																MARVELD3
	ALAS1		KIAA1908																CES3
	MTPN		LOC100652739																UBE2F.SCLY
	HTR7P1		KIF3A																PAG1
	TMED3		DUXA																SERPINA3
	EEA1		CHRNB1																CCDC141
	SNORD10		BPIFB2																NAPSA
	LRRC4		SNORA31																SLCO2A1
	PDIA3		ZNF625.ZNF20																CCL8
	PAPSS1		SELE																GLIS2
	NSF		HES2																CASP7
	TMEM19		NPPA.AS1																IL27RA
	BZW1		NR5A2																ADARB2
	CAPZA2		HLA.L																MRAP2
	RIT1		CTU1																PDE4A
	CYP51A1		CAPN2																ABCB5
	ITGAV		CHST6																KIAA1671
	LRRC16A		C20orf111																CTAGE7P
	SESN3		SLC6A20																LOC389033
	SEC23B		LOC286186																DHRS4
	GYG1		LRRC37A																UHRF1BP1
	HSPA4		GPR172B																PHOSPHO2
	SAMD9		C21orf49																LOC284379
	CPPED1		C20orf3																LOC727849
	ZDHHC2		FLJ39653																PMS2CL
	MRPL42		PSIMCT.1																HLA.DRB6
	PRCP		RPS2P32																SNAPC5
	RET		ZNF442																C9orf85
	FAM49B		TMEM218																ABCG1
	PLEKHO2		MAP3K9																CHAF1A
	HYOU1		ARHGAP28																PMEL
	CYP7B1		TFPI2																LEPREL1
	SLC30A1		GDAP1																ARL2.SNX15
	ATP1B3		LOC100128531																COX11
	PGK1		NEBL																UPK1B
	SOCS4		EPB41L3																CCDC169.SOHLH2
	C12orf5		CLEC2D																CDK2AP1
	UHMK1		EIF3C																TMEM236
	FDX1		FLJ12825																SNORA81
	SPCS3		GTF2H2B																FAM21B
	SCCPDH		YEATS4																PYGL
	ZDHHC20		SLC39A14																ADAMTS18
	SLC44A1		ADCY1																MCCC1
	COMMD8		AQPEP																SHMT1
	MGAT2		ING1																SEC14L4
	LYPLA1		PRR5.ARHGAP8																C7orf29
	ACTR2		DGKB																LOC650293
	STARD4		CAMK2N1																RYR2
	EPHB2		RNF138P1																HERC2P7
	EFR3A		SNORA77																NKX3.1
	NEK6		CNTNAP4																NR2F2
	PANK3		ZNF702P																KRBA2
	AMD1		RIN2																BCL2L11
			FONG																BACH2
			ANP32E																CPNE4
			ENOX1																WNT6
			LOC220729																STEAP1B
			LOC283693																DZIP1L
			RAB3IP																LOC100505783
			NEK4																LINC00476
			DPH3																RNASEK.C17ORF49
			GRIK2																MAGEA10
			PTGER4																HLA.DQA2
			C5orf44																HEY2
			HRNR																COL4A5
			ALX1																TSLP
			LOC349196																ZNF107
			P2RY12																FAM86C2P
			ZNRF2P2																ZNF493
			LOC388630																METTL21CP1
			AMPH																LOC100507577
			LOC645513																ZNF252
			XRCC6BP1																ITGB1BP1
			UBIAD1																KLHL30
			KRBOX1																LOC400548
			SRR																STAG3L2
			GJA1																SELENBP1
			MOGAT1																LOC441204
			GNAO1																CDRT4
			HAUS3																ADRB3
			MSTO1																ECEL1
			ISY1.RAB43																IGFN1
			FOXF2																JMJD7.PLA2G4B
			GLTPD2																SSH2
			BBIP1																TDRD5
			SIX1																BTLA
			XKR9																INO80B
			ABTB2																B3GALNT2
			ZNF484																ZNF680
			FRMD6.AS1																TLCD2
			ARHGAP26																KLRF1
			GULP1																FGF9
			CREB5																GLCCI1
			RASL12																CBLN1
			C10orf105																LSS
			FAM110B																LOC284023
			CDH20																GUCY1A3
			LOC100289511																PAN3.AS1
			SHROOM3																CCT6P3
			RGPD4																DPYSL4
			ZNF776																IGJ
			HLA.H																HSD17B13
			DHTKD1																TCTEX1D1
			SLC25A43																ZNF321P
			CORO7.PAM16																CLEC2L
			EYA4																HCG18
			FAR2																GPR89C
			EFR3B																SYNM
			ADAMTSL5																C1orf126
			RPL13P5																P2RX5.TAX1BP3
			C14orf37																COX6B2
			TMEM59																ZNF585A
			HLA.DRB5																ZNF835
			ZNF674																DNAL1
			PARP11																TMEM140
			MYLK4																SHROOM2
			ZNF250																LOC100216479
			ZNF286B																FOXD4
			AP5B1																C20orf132
			SOD2																SMTNL2
			CCDC122																FANCE
			LOC441242																CLEC18A
			C1RL																FAM162B
			DNAJC21																LIPT1
			ETV1																BCL2L15
			LIMD1																NBR2
			NBPF24																MKL2
			ZNF14																RBPMS2
			F2R																GUCY1B3
			MYOF																C2orf40
			CPXM2																C17orf97
			CASP2																ASAH2B
			MZT1																SLC22A5
			DSG3																SLC7A5P2
			FGFR2																FAM66C
			LARS2																SPOCK2
			ABI2																ACBD7
			SURF4																CABP1
			COL11A1																FAM91A2
			SLC22A23																RBM20
			CTH																HEBP1
			SYNC																MGC3771
			ZNF514																SVEP1
			PLEKHH2																ABCC6P2
			LOC100129662																RPS6KL1
			PCDHA13																PCDHB9
			ARNT2																LOC219347
			ITGB5																LOC730091
			FAM127C																CDKN2AIPNL
			TP53																LOC221442
			MRC2																SYCP1
			SHC3																NMUR1
			RIMBP2																C11orf80
			FAM45A																ADK
			AMACR																LOC100506599
			NUDT3																TSHZ1
			CGNL1																GREB1
			KIAA0889																SLC15A5
			CRISPLD1																SLC28A2
			ZNF812																LOC100132352
			NOV																ATP5S
			PMS2																SBDSP1
			STAG3L4																KIAA1324L
			LCLAT1																ZNF526
			OPA3																MIAT
			ZNF763																CNR1
			KHDRBS3																ABCA5
			FAM66B																TSR1
			GLB1L																LEFTY2
			LOC100132111																ELK2AP
			SEMA5A																AGSK1
			KCTD10																NRK
			STK32A																NRP2
			KCNJ12																GLIPR1L2
			SDC3																DCAF16
			ZNF681																SPATA18
			PDGFRB																LOC100130093
			SERINC5																SLC7A14
			CEP78																RPH3AL
			RFPL1.AS1																MEOX2
			RAVER2																SCN3B
			SNAP29																VGLL3
			LOC284408																FAM182B
			ZNF502																KANK2
			TNFAIP3																SLC6A1
			SYT17																CATSPER2P1
			CXCR7																POM121L8P
			C7																CEACAM1
			DSTN																IGFBP5
			CPQ																TRPC4
			BRCA1																SLA2
			FRRS1																ACAT1
			ARHGEF26																EXD1
			HMCN1																NECAB1
			P4HA2																ESR2
			GPR176																TBX5
			NEK11																GRTP1
			SIM1																SEMA3B
			RNASEH2B																TBX4
			ZNF492																LOC100288069
			SOX10																PYGM
			PSAT1																RARB
			PLXNA4																UIMC1
			UFSP2																CLCNKA
			P2RY13																DCAKD
			COL25A1																DMRT2
			SAMD12																ALDH7A1
			TMEM43																LINC00087
			MGC57346																FAM83F
			GLI2																SLC16A9
			LOC731275																EHD2
			ANGPTL2																ACOT2
			GJC1																ARID5B
			CLIC2																STARD8
			NOG																KGFLP1
			DUSP4																C8orf46
			IL16																GUSBP2
			CBL																OMA1
			CSPG4																PGD
			PIGX																DTNA
			GLS																LRRC61
			DTX1																IGFBP7
			FRMD3																PRPH
			PDPR																SOX7
			KCNE3																TLE1
			PTN																LOH12CR2
			FGF1																TMIGD2
			LRRC37A4																DUOX1
			NID1																DPH3P1
			SULT1C2																WDR52
			MAMDC2																PCDHB12
			HRASLS5																FLJ41484
			DNAJB1																CABLES1
			MYADM																MRI1
			DHRSX																CCDC68
			NTN1																SERINC4
			PEX1																WNT5B
			TBCCD1																TMTC4
			MAL2																GRPEL2
			RNF152																LOC100505738
			CCRL1																MSTN
			MAP2																CRLS1
			KLF10																ITGA6
			PCDHGB2																HIST1H2AC
			SREBF2																DPPA4
			TLE3																CLIC5
			PTPLAD1																TRMT2B
			IGSF3																LOC100507421
			CPE																CTC1
			GABRG1																UBAC2.AS1
			GNS																PRR15
			C9orf80																PKNOX2
			OR7D2																ST6GALNAC3
			FKTN																S1PR5
			FAM47E.STBD1																MYH2
			TMEM169																LOC340544
			ACCN2																ENPP3
			PPARGC1B																HOXA7
			SHPK																TTC14
			SUB1																EPB49
			SLC16A1																REPIN1
			TBX18																KCNC4
			FAM161B																SAA2
			TBX1																PECR
			ANO3																ZNF160
			ZNF506																AGMO
			SLC22A3																NAALAD2
			TIRAP																PITX1
			NME7																MRVI1
			LYVE1																PDE8B
			ZNF701																NRIP2
			CXCL5																RERG
			ALX4																MGC16703
			MCART6																PTPRK
			ZNRF2P1																PLEKHG6
			KCTD21																FGF11
			PCDHA12																PGM5
			CERCAM																CEBPA
			KLHDC7A																DPY19L2P2
			UAP1																STOM
			ITM2A																CXXC4
			ZNF772																DDX51
			SPON1																PPARD
			LOC100130992																LOC286297
			RNF169																LPL
			CHPT1																HOOK2
			AGFG1																SV2B
			PGR																TMCC3
			CXorf56																DPP6
			SERPINB9																ISOC1
			SKP2																SCN2A
			C6orf97																ANO2
			CPM																C10orf103
			RACGAP1																WNK3
			LRFN5																RBM48
			LOC728066																PARM1
			LOC286437																OBSCN
			ADAL																LDOC1
			SNX16																SNORA70
			BNIP3L																SAA1
			LOC100287216																CYB5D1
			ZNF221																CA8
			TRIM13																FAM66D
			BOLA3.AS1																AFF3
			TRIM6																LOC100132215
			HUS1																FLJ10038
			ULK4P3																RNF165
			FCF1																BMP4
			TSC22D2																LIN52
			ENPP4																ZNRF3
			RNF138																ESRP2
			DKK2																NOTCH1
			NOMO1																HAS3
			GDAP2																OTUD3
			LOC654433																FRY
			GXYLT2																TPGS2
			ARSK																SLC2A4
			B7H6																OSGIN2
			ZNF616																LOC646278
			LBH																PGM1
			FAM217B																CSGALNACT1
			LRRN3																THBS4
			AGA																CACNA2D2
			ZNF436																PKD2
			EXOSC6																WSCD1
			LOC255480																TSPAN7
			LRRK1																SEPT7P2
			GNPNAT1																SLC16A14
			STK4																CES4A
			TPSD1																LOC100335030
			LOC100506305																PARD6G
			DBT																MCC
			NBPF1																FAM204A
			DSCC1																OCLN
			SNX10																ACYP2
			TMEM237																TACSTD2
			HNRNPUL2.BSCL2																PCMTD2
			C14orf167																PITRM1
			EDIL3																LOC100505876
			KLHL4																RGS3
			HLTF																FAM86B1
			ARHGAP20																NICN1
			STAT1																C3orf55
			ROBO2																LOC284440
			MBNL3																IRS1
			FGF10																RAI1
			EXT1																PLEKHM1P
			LOC100287559																FLT1
			ACHE																ACO2
			STAG3L1																GPRC5B
			ALG11																CNTD2
			SLC1A3																C8orf34
			TEKT4P2																USP33
			ZHX1																NLGN1
			NBPF14																C1orf213
			RIF1																GPD1L
			ZNF813																FMO2
			STAT3																TCF7L2
			GCLC																FAM92A3
			WSB2																GKAP1
			PIGN																MXRA7
			UBTD2																LOC100132832
			ADAMTS12																SLC6A9
			DACT1																NDN
			GLI3																POM121C
			STS																LOC100506472
			GUF1																LRRTM4
			TPI1P2																SYBU
			LINC00472																L1TD1
			MAP7																REEP2
			VKORC1L1																MAP4K3
			SLC25A30																SULT1C4
			ZNF562																SATB1
			MAP4K4																NQO2
			LOC442028																BHMT
			C11orf41																EPB41
			GRIN3A																CCDC69
			MAB21L1																STRADB
			OSMR																CYYR1
			PTPRT																KIF21A
			TBC1D8B																APOL6
			THSD4																LACTB2
			SLC24A3																STC1
			TROVE2																PLCH2
			CALCRL																BTG2
			CDH1																FNIP1
			SGCE																LOC100505648
			TMX4																SEMA6D
			TM9SF3																ADRB1
			MUTED																CCDC88C
			DCTN5																SPARCL1
			PITPNM3																GALNTL2
			GREM2																UNC5C
			PREX2																FBXW10
			PUS7L																PAWR
			OLA1																PRDM16
			PLP1																LOC387646
			ARL6IP5																NFS1
			RAB27B																CCDC102A
			DBR1																ALDH1A1
			G3BP1																OR2A9P
			ENAH																LOC386597
			MOCS3																TSPAN10
			TFAP2C																FBXL20
			PHLPP2																SUCLG1
			TP53BP1																GCFC2
			ABCB1																LOC100306951
			PCDHGA2																LOC100506795
			RGS7BP																AGAP1
			LRRC15																LOC493754
			PLCE1																LINC00264
			ADAMTS5																GLYAT
			IFIT2																LOC728558
			LOC100132077																POLI
			FAM155A																TMEM189
			PAM																SMAD1
			SNX7																MARCH3
			TLK1																RASSF10
			TMEM30B																EPB41L1
			LOC100505812																GATA3
			CAMK1D																ATPAF1
			ZNF70																DCUN1D3
			CCNDBP1																AIFM2
			OMD																HOXB8
			ZNF551																MYH1
			SULF1																MGEA5
			HMBOX1																ANKRD33B
			SLC33A1																LOC731424
			UFL1																FAM47E
			ZNHIT6																FASN
			SOBP																UPF3A
			LUZP1																FIGF
			MTMR12																GRID1
			KBTBD7																C14orf126
			ARHGAP42																GNG4
			GSR																C9orf25
			ZNF468																PDE6A
			RNF144B																LOC389791
			SCRN1																ORMDL3
			ZFP91.CNTF																TBX3
			KCTD18																TMC7
			LOC283299																C1orf198
			STEAP2																DTX2P1.UPK3BP1.PMS2P11
			CYP4F24P																TM7SF2
			RALA																SEL1L2
			GDE1																RBPMS
			SEMA3C																GPI
			C14orf21																SLC35F1
			IFNAR2																PFN2
			FLRT2																TRDN
			PDLIM5																BAHCC1
			MBTPS2																ZNF611
			BRPF3																NPR3
			PIK3R1																LHCGR
			EFEMP1																SAA2.SAA4
			ZNF528																UBA2
			NCKAP5																DMWD
			EP300																NMNAT3
			CRK																INE1
			TIPARP																TSPAN18
			SPTSSB																IPW
			BDNF																PHLDB2
			DAG1																PKP1
			BMP5																SHANK2
			SRGAP1																PCDH19
			BHLHE41																GPR125
			L1CAM																SBDS
			ITGA8																GYG2
			C6orf174																PBLD
			DTWD2																TPRG1
			GCLM																CACNG8
			MSN																ZNF471
			C9orf30.TMEFF1																EEPD1
			SNAI2																LOC100506930
			ITGA11																EIF1AD
			FBXL5																MASP2
			ODZ4																TP73.AS1
			TMCO3																LOC147670
			ABHD5																PKD1L1
			AFAP1																FAM107A
			COL15A1																MYO1C
			ZBTB8A																SLC35E2B
			PAR.SN																C10orf58
			RNASEL																CCDC3
			PDE12																BNIPL
			CREB3L2																GOLGA6L6
			LRRCC1																RAB3B
			NAP1L3																LINC00312
			ENTPD7																C6orf123
			ALDH3A2																PCDHB2
			WIPF2																HOXC10
			DRD1																MGST1
			SEPT10																CNTD1
			GPX8																HOXC6
			RRM1																EPB41L4B
			AIM1																EPAS1
			MCPH1																C20orf7
			GNPTAB																ESR1
			CHM																SEC14L1
			COG6																C15orf2
			SLC25A24																PODXL
			LAX1																SLC25A4
			TSHZ2																ALDH2
			KIAA1586																SYNPO2
			LOC100132891																PRKD1
			A4GNT																ZNF275
			BTBD9																ADH5
			NNT																TEK
			LGR4																CTF1
			RHOQ																OTUD7B
			LNPEP																RGS5
			TTLL7																NAP1L5
			ZC3HAV1L																ERG
			KIAA1143																NME4
			ZMPSTE24																NPR1
			LRP1																DPH1
			ERV3-1																FAM18A
			HFE																MGC45800
			CYP26B1																PIEZO1
			ERC1																SPATA9
			TCP11L2																PLAT
			HIVEP1																SLC19A2
			FUT11																CADM2
			SLC30A4																F8
			COG5																STXBP1
			ZFPM2																LOC92249
			IFFO2																AQP7P1
			BAG5																GOLGA2
			GPC6																SCAND2
			SEPP1																PAPSS2
			SNX2																KLLN
			PDSS2																ENTPD3
			ATXN1L																EBF2
			LAMP2																TMEM120B
			NBPF15																EBF3
			EVC																PPP1R16B
			PLA2R1																PHLPP1
			LIN54																GNAI1
			FBN1																S1PR1
			TMEM38B																LOC100129794
			MSH3																ADCY6
			LRIG3																ENPP1
			B4GALT5																AIF1L
			C4orf34																PRPF40B
			ANTXR1																EFNA5
			RDX																PCDHGA3
			XYLT1																DPY19L2P3
			LUZP6																GIMAP6
			FAM107B																MYOM1
			SYNRG																DMGDH
			LRRC3																SLC26A7
			RPL7L1																PTPRF
			LMBRD2																AIG1
			ZNF141																SLC25A45
			DEK																GPT2
			GOLT1B																C3orf26
			CTDSP2																LOC90834
			DSEL																PLA2G16
			XPR1																DMKN
			WLS																PHKA2
			LDLRAD3																PTEN
			MGAT5																F3
			DIXDC1																LOC100506469
			MSL2																STOX1
			SEC24A																FLJ43390
			IGF2R																RDH10
			MCFD2																SLC25A23
			ACSL4																TUFT1
			GSPT1																MECOM
			SLIT3																LIPE
			TSPAN11																INADL
			LRRC57																LOC100131434
			GTF2H2D																TEAD1
			PDPK1																KLHL21
			LINC00256B																LMTK2
			AK3																SLC1A5
			RABL3																WFS1
			SERTAD4																STC2
			ALDH1L2																ITGA7
			HELZ																TNN
			SP3																C1orf109
			PCDHAC2																MTUS1
			KLF11																KIAA1217
			NXT2																KLHL5
			PCDHGA9																DAB2IP
			PID1																ATP1A2
			GPM6B																TMEM133
			TMF1																LOC401093
			MED28																CELSR2
			SMAD2																GPRASP1
			CCNI																DDR1
			PTPN9																APBB2
			CPSF2																JAKMIP3
			TMEM66																SH3BGRL2
			DDX21																ACSS3
			CPEB4																ALPK3
			PLCL1																PPARG
			TWSG1																MCAM
			CNIH																PROM2
			SLC25A46																MICAL3
			ATP13A3																AQP7
			YIPF5																SOCS2
			ETV3																PRDX6
			C18orf1																USP30
			DHX36																KIF1C
			TIMP2																SPIN3
			HNRNPH2																OR2A20P
			ZBTB41																FZD4
			UTP20																PIGP
			MAGT1																RIC3
			GFM1																NFASC
			ZNF623																ZNF204P
			RRAGC																PRICKLE2
			ITGB3																STBD1
			CHN2																CTIF
			DHX9																MAST4
			CYSLTR1																LOC339290
			GNPDA2																FBXO32
			ROBO1																FZD5
			KIAA1377																TMEM22
			TLR3																ACAD11
			KIAA1715																VIP
			SSR3																GDF5
			CBX6																HEMK1
			DCK																SOCS7
			FAM168A																SLC5A6
			PAPD5																CTNNBIP1
			AHNAK																SASH1
			RAB30																LGALS8
			LZTFL1																C1orf21
			HS2ST1																PFKFB1
			ZNF281																MYO16
			RAB21																SH3TC2
			TMEM106B																RGS6
			LITAF																ATN1
			TMEM56																CAND2
			EPRS																BNIP3
			REEP3																MLLT6
			SLC35A3																LOC286189
			TMTC3																SLC12A4
			DOCK11																ADAMTSL3
			LOC100129034																TEAD3
			RBM12																KLF8
			BACE1																TXLNG
			UHRF1BP1L																ATP7B
			LZIC																KLF15
			SMC2																SOX6
			ERMP1																LOC283392
			FKBP14																ECHDC3
			TXNRD3																NAT8L
			ELF1																LOC100286844
			MTX3																RHOBTB3
			OAT																STX16
			UEVLD																FAM71F2
			TTC30A																AASS
			TMED5																TJP1
			ATF1																CHCHD3
			LRP12																SDPR
			GTF2H3																FBXL18
			CLTC																TSPAN6
			MMGT1																KAZN
			GNG12																XPNPEP3
			ANKH																KIAA0182
			MANEA																SLC6A8
			LIMS1																PLEKHG5
			G3BP2																ITSN1
			ATF6																PLIN5
			TGFBRAP1																CYP2C8
			CDC27																RBMS2
			TBC1D5																SLC4A4
			GRIN2B																CDNF
			SMCR8																ARHGEF17
			ZEB2																ZNF69
			ITGA9																ANKS1A
			LMBR1																TNFAIP8
			PPTC7																ACADL
			GOLIM4																AKAP2
			TRIM44																EDNRA
			KIRREL																MYH14
			GTF3C4																NUDT4P1
			OXR1																TSEN2
			CASK																TJP2
			NOTCH2																AMOTL2
			DYM																RAPGEF5
			ROR1																MARC1
			ZFP91																NPY1R
			BLZF1																NPY5R
			CTSO																CCDC85A
			TMED7																FAM89A
																			DMD
																			MAOA
																			PTPRQ
																			TTPA
																			SYN2
																			FBXO27
																			ARHGEF7
																			PARD3B
																			PTPRM
																			MBD2
																			GABRE
																			PDZD2
																			BHMT2
																			MYH10
																			SPRED2
																			PCLO
																			SLC19A3
																			ATXN2
																			EPB41L4A
																			GPR116
																			COG7
																			KIAA1462
																			CALCOCO1
																			EBF1
																			PLIN1
