# Supplementary material for: Bariatric Surgery Induces Disruption in Inflammatory Signaling Pathways Mediated by Immune Cells in Adipose Tissue: A RNA-Seq Study
Source: PLoS One. 2015 May 4;10(5):e0125718. doi: 10.1371/journal.pone.0125718 (PMC4418598; doi:10.1371/journal.pone.0125718)
Supplement: S8 Table — Each sheet of the Excel file corresponds to a different module. (XLSX) [file pone.0125718.s014.xlsx]

## Sheet: turquoise
Table S8A: Genes of the turquoise module, ranked by decreasing module membership (MM) from +1 (positive contribution) to -1 (negative contribution).
Stability indicates the number of times the gene is correctly classified in the 22 Jackknife sub-analyses.
Genes listed in the GO category are genes of the module belonging to the given enriched category
Gene ID	MM	Stability		Genes in GO:0006955 "immune response"
MAPK13	0.988432	22		ACP5	acid phosphatase 5, tartrate resistant
FERMT3	0.987497	22		APLN	apelin
CD300LB	0.983696	22		APOBEC3F	apolipoprotein B mRNA editing enzyme, catalytic polypeptide-like 3F
PLEK	0.979959	22		AQP9	aquaporin 9
RPS6KA1	0.979235	22		ARHGDIB	Rho GDP dissociation inhibitor (GDI) beta
LCP1	0.978491	22		BCL10	B-cell CLL/lymphoma 10; hypothetical LOC646626
NCKAP1L	0.978253	22		BLNK	B-cell linker
ST14	0.977875	22		BNIP3	BCL2/adenovirus E1B 19kDa interacting protein 3
NCEH1	0.975943	22		BTLA	B and T lymphocyte associated
NPC2	0.975927	22		C1QA	complement component 1, q subcomponent, A chain
MPP1	0.975692	22		C1QB	complement component 1, q subcomponent, B chain
IGSF6	0.975148	22		C1QC	complement component 1, q subcomponent, C chain
CCR1	0.974642	22		C2	complement component 2
PLAUR	0.974246	22		C5AR1	complement component 5a receptor 1
CD52	0.973629	22		CARD9	caspase recruitment domain family, member 9
ITGB2	0.9734	22		CCL13	chemokine (C-C motif) ligand 13
HK3	0.973113	22		CCL18	chemokine (C-C motif) ligand 18 (pulmonary and activation-regulated)
LAPTM5	0.973014	22		CCL2	chemokine (C-C motif) ligand 2
FABP3	0.972125	22		CCL22	chemokine (C-C motif) ligand 22
NPL	0.971648	22		CCL3	chemokine (C-C motif) ligand 3
PLA2G7	0.97131	22		CCL4	chemokine (C-C motif) ligand 4
IFI30	0.970473	22		CCL7	chemokine (C-C motif) ligand 7
LPXN	0.968882	22		CCL8	chemokine (C-C motif) ligand 8
CD53	0.967677	22		CCR1	chemokine (C-C motif) receptor 1
HEXB	0.966683	22		CCR5	chemokine (C-C motif) receptor 5
CYP27A1	0.966644	22		CD14	CD14 molecule
KCNK13	0.96652	22		CD180	CD180 molecule
CD300C	0.96597	22		CD1B	CD1b molecule
KCNAB2	0.965682	22		CD209	CD209 molecule
RAC2	0.964718	22		CD274	CD274 molecule
CD180	0.964595	22		CD276	CD276 molecule
SASH3	0.964561	22		CD300A	CD300a molecule
CTSB	0.964352	22		CD300C	CD300c molecule
SLAMF7	0.963564	22		CD300LB	CD300 molecule-like family member b
STXBP2	0.96309	22		CD4	CD4 molecule
FGR	0.962715	22		CD83	CD83 molecule
CXCL16	0.961878	22		CD86	CD86 molecule
CTSZ	0.961588	22		CD97	CD97 molecule
SLC7A7	0.961446	22		CHIT1	chitinase 1 (chitotriosidase)
TRPV2	0.961388	22		CLEC10A	C-type lectin domain family 10, member A
GALM	0.961114	22		CLEC4A	C-type lectin domain family 4, member A
MATK	0.96106	22		CNPY3	canopy 3 homolog (zebrafish)
CD68	0.960966	22		CR1	complement component (3b/4b) receptor 1 (Knops blood group)
RGS1	0.960683	22		CTSC	cathepsin C
BTK	0.960111	22		CTSS	cathepsin S
ARPC5	0.959742	22		CXCL16	chemokine (C-X-C motif) ligand 16
ACP5	0.959237	22		CXCL3	chemokine (C-X-C motif) ligand 3
MFSD12	0.958666	22		CYBA	cytochrome b-245, alpha polypeptide
TREM2	0.958509	22		CYBB	cytochrome b-245, beta polypeptide
GM2A	0.95777	22		ENPP1	ectonucleotide pyrophosphatase/phosphodiesterase 1
ATP6V1B2	0.957209	22		ENPP3	ectonucleotide pyrophosphatase/phosphodiesterase 3
ITGAX	0.95698	22		FAIM3	Fas apoptotic inhibitory molecule 3
DOK2	0.956685	22		FCER1G	Fc fragment of IgE, high affinity I, receptor for; gamma polypeptide
LIMK1	0.956596	22		FCGR1A	Fc fragment of IgG, high affinity Ic, receptor (CD64); Fc fragment of IgG, high affinity Ia, receptor (CD64)
PTPRO	0.956167	22		FCGR2B	Fc fragment of IgG, low affinity IIb, receptor (CD32); Fc fragment of IgG, low affinity IIc, receptor for (CD32)
SLC16A3	0.956099	22		FCGR3A	Fc fragment of IgG, low affinity IIIa, receptor (CD16a)
KYNU	0.955899	22		FCGRT	Fc fragment of IgG, receptor, transporter, alpha
EGR2	0.955737	22		FTH1	ferritin, heavy polypeptide 1; ferritin, heavy polypeptide-like 16; similar to ferritin, heavy polypeptide 1; ferritin, heavy polypeptide-like 3 pseudogene
DNASE2B	0.955257	22		GPI	glucose phosphate isomerase
KCNN4	0.95433	22		GPR183	G protein-coupled receptor 183
WDFY4	0.953786	22		GPR65	G protein-coupled receptor 65
TMEM206	0.953291	22		HAMP	hepcidin antimicrobial peptide
SLC4A8	0.953287	22		ICAM1	intercellular adhesion molecule 1
ALCAM	0.953202	22		ICOSLG	inducible T-cell co-stimulator ligand
CAPG	0.952992	22		IGJ	immunoglobulin J polypeptide, linker protein for immunoglobulin alpha and mu polypeptides
CNIH3	0.952376	22		IGSF6	immunoglobulin superfamily, member 6
PIK3AP1	0.952143	22		IKBKE	inhibitor of kappa light polypeptide gene enhancer in B-cells, kinase epsilon
SDS	0.951957	22		IL10	interleukin 10
VAMP8	0.950805	22		IL18BP	interleukin 18 binding protein
STAC3	0.950722	22		IL1RN	interleukin 1 receptor antagonist
H2AFY	0.950612	22		IL27RA	interleukin 27 receptor, alpha
GPR183	0.950425	22		IL2RG	interleukin 2 receptor, gamma (severe combined immunodeficiency)
NAGA	0.949693	22		IL4R	interleukin 4 receptor
SLC29A3	0.949073	22		IL6R	interleukin 6 receptor
C1orf162	0.948739	22		IL8	interleukin 8
SPI1	0.948698	22		ITGAD	integrin, alpha D
SLC15A3	0.948496	22		ITGAL	integrin, alpha L (antigen CD11A (p180), lymphocyte function-associated antigen 1; alpha polypeptide)
MSR1	0.948361	22		KYNU	kynureninase (L-kynurenine hydrolase)
LIPA	0.94788	22		LCP1	lymphocyte cytosolic protein 1 (L-plastin)
TM4SF19	0.947753	22		LCP2	lymphocyte cytosolic protein 2 (SH2 domain containing leukocyte protein of 76kDa)
FBP1	0.947705	22		LILRA1	leukocyte immunoglobulin-like receptor, subfamily A (with TM domain), member 1
LSP1	0.947641	22		LILRA3	leukocyte immunoglobulin-like receptor, subfamily A (without TM domain), member 3
NCF2	0.947418	22		LILRA6	leukocyte immunoglobulin-like receptor, subfamily A (with TM domain), member 6
CD84	0.947369	22		LILRB1	leukocyte immunoglobulin-like receptor, subfamily B (with TM and ITIM domains), member 1
SLAMF8	0.947044	22		LILRB2	leukocyte immunoglobulin-like receptor, subfamily B (with TM and ITIM domains), member 2
TTYH3	0.946657	22		LILRB4	leukocyte immunoglobulin-like receptor, subfamily B (with TM and ITIM domains), member 4
GLIPR1	0.946547	22		LILRB5	leukocyte immunoglobulin-like receptor, subfamily B (with TM and ITIM domains), member 5
ATP6AP1	0.946335	22		LY86	lymphocyte antigen 86
TYROBP	0.946133	22		LY9	lymphocyte antigen 9
IL4I1	0.946076	22		LY96	lymphocyte antigen 96
SH3BGRL3	0.94571	22		MASP2	mannan-binding lectin serine peptidase 2
SIGLEC9	0.945646	22		MBP	myelin basic protein
CCDC88A	0.944694	22		MICB	MHC class I polypeptide-related sequence B
ATF3	0.944316	22		MR1	major histocompatibility complex, class I-related
TBC1D2	0.942421	22		MYD88	myeloid differentiation primary response gene (88)
MAPKAPK3	0.942041	22		MYO1F	myosin IF
LY96	0.942029	22		NCF2	neutrophil cytosolic factor 2
LRRC25	0.941946	22		NLRP3	NLR family, pyrin domain containing 3
GRN	0.941516	22		NOTCH1	Notch homolog 1, translocation-associated (Drosophila)
DUSP2	0.941476	22		OAS1	2',5'-oligoadenylate synthetase 1, 40/46kDa
FCER1G	0.941354	22		OLR1	oxidized low density lipoprotein (lectin-like) receptor 1
GLA	0.941097	22		ORAI1	ORAI calcium release-activated calcium modulator 1
PLD3	0.940107	22		PAG1	phosphoprotein associated with glycosphingolipid microdomains 1
ARRB2	0.939903	22		PMS2CL	PMS2 C-terminal like pseudogene
SLC6A12	0.93985	22		PNP	nucleoside phosphorylase
ATP1B1	0.939405	22		POU2F2	POU class 2 homeobox 2
FAM96A	0.939365	22		PPARG	peroxisome proliferator-activated receptor gamma
FAIM3	0.938428	22		RAB27A	RAB27A, member RAS oncogene family
SLC37A2	0.937964	22		RGS1	regulator of G-protein signaling 1
EMILIN2	0.937306	22		SAMHD1	SAM domain and HD domain 1
AQP9	0.937025	22		SECTM1	secreted and transmembrane 1
MYD88	0.936461	22		SEMA7A	semaphorin 7A, GPI membrane anchor (John Milton Hagen blood group)
ITGA3	0.936049	22		SLA2	Src-like-adaptor 2
C5AR1	0.935536	22		SLAMF7	SLAM family member 7
SLC26A11	0.934855	22		SLC11A1	solute carrier family 11 (proton-coupled divalent metal ion transporters), member 1
TNFRSF11A	0.934843	22		SPN	sialophorin
P2RX4	0.934745	22		STXBP2	syntaxin binding protein 2
LOC283050	0.934138	22		TFEB	transcription factor EB
MMP19	0.933876	22		TGFB1	transforming growth factor, beta 1
TNFAIP8L2	0.931536	22		TLR5	toll-like receptor 5
CCR5	0.930186	22		TLR8	toll-like receptor 8
CTSD	0.929566	22		TNFAIP8L2	tumor necrosis factor, alpha-induced protein 8-like 2
TM7SF4	0.929452	22		TNFRSF1B	tumor necrosis factor receptor superfamily, member 1B
BCAT1	0.929413	22		TNFSF13	TNFSF12-TNFSF13 readthrough transcript; tumor necrosis factor (ligand) superfamily, member 12; tumor necrosis factor (ligand) superfamily, member 13
PI4K2A	0.929002	22		TNFSF14	tumor necrosis factor (ligand) superfamily, member 14
GDF15	0.928541	22		TNFSF15	tumor necrosis factor (ligand) superfamily, member 15
CAP1	0.927639	22		TNFSF8	tumor necrosis factor (ligand) superfamily, member 8
IQGAP2	0.926843	22		TREM2	triggering receptor expressed on myeloid cells 2
NLRC4	0.926779	22		TREML1	triggering receptor expressed on myeloid cells-like 1
SLC38A6	0.926759	22		VAV1	vav 1 guanine nucleotide exchange factor
CD86	0.925246	22		VNN1	vanin 1
PTPN6	0.923578	22		VSIG4	V-set and immunoglobulin domain containing 4
CHST11	0.923104	22		WAS	Wiskott-Aldrich syndrome (eczema-thrombocytopenia)
FKBP15	0.922855	22
GPC4	0.92255	22
LRRC33	0.922092	22
LOC100506585	0.922019	22
SPINT1	0.921842	22
CD83	0.921788	22
LGALS9	0.921606	22
DHRS9	0.921244	22
ARPC3	0.92124	22
KIAA0930	0.921237	22
HCST	0.920594	22
GALNT6	0.919872	22
SMS	0.919561	22
COL22A1	0.919558	22
CD300A	0.919332	22
EMP3	0.919182	22
GNA15	0.9188	22
RASL11B	0.91867	22
GOLGA7B	0.91842	22
ASF1B	0.918012	22
MYO9B	0.917866	22
TBXAS1	0.916154	22
SLC28A3	0.916017	22
CA2	0.915984	22
RNASE6	0.915857	22
RIN3	0.915326	22
SPOCD1	0.913905	22
PIK3R5	0.913046	22
MMP7	0.913039	22
C6orf115	0.91245	22
RHOG	0.911711	22
PYCARD	0.911491	22
APOBR	0.911058	22
GUSB	0.910688	22
CDCA5	0.910624	22
CLN6	0.91061	22
ARPC1B	0.910307	22
ALDH3B1	0.910251	22
RGS10	0.909664	22
CLIC1	0.909392	22
CECR1	0.90937	22
LOC154092	0.909289	22
CTSS	0.909146	22
TREML1	0.908557	22
KIF11	0.908547	22
DOPEY2	0.908501	22
HAVCR2	0.90777	22
GSTO1	0.906032	22
LILRB3	0.90596	22
MYOZ1	0.905757	22
CALM3	0.905288	22
CCL3	0.905122	22
CMTM7	0.905105	22
MS4A6E	0.904896	22
TFEC	0.904664	22
WDR1	0.904473	22
GMIP	0.904108	22
LILRB4	0.903876	22
MMP9	0.903528	22
NFKBIE	0.902698	22
SYK	0.902641	22
GPSM3	0.902403	22
ATG7	0.900858	22
NUSAP1	0.900539	22
CHI3L1	0.899172	22
ST18	0.899162	22
CCRL2	0.898954	22
SLC45A3	0.89843	22
PTTG1	0.898027	22
PRAM1	0.89787	22
EFHD2	0.897799	22
BCL2A1	0.897596	22
PPT1	0.897305	22
ARHGAP30	0.896776	22
C3AR1	0.896307	22
NFAM1	0.895892	22
STK10	0.89496	22
UHRF1	0.894814	22
NAGK	0.894799	22
SLAMF9	0.894703	22
KCTD5	0.894316	22
SGK1	0.893542	22
TOP2A	0.893074	22
TRIM14	0.892748	22
CENPE	0.891913	22
USP2	0.891722	22
ATP6V0D2	0.891658	22
C11orf75	0.891192	22
TGFB1	0.890278	22
LMNB1	0.889434	22
MNDA	0.889265	22
CKS2	0.88909	22
HS3ST2	0.889029	22
SEC14L2	0.888663	22
CATSPER1	0.888344	22
SFXN3	0.888301	22
EMR2	0.888047	22
C1orf38	0.88791	22
PARVG	0.887466	22
MS4A4A	0.887362	22
KCNJ5	0.887322	22
C2	0.886205	22
PHLDA1	0.884592	22
TPK1	0.884076	22
FPR3	0.883773	22
VSIG4	0.883718	22
CTSL1	0.882468	22
ITGAM	0.881648	22
SOWAHD	0.880585	22
SH3BP1	0.880335	22
NCAPH	0.880327	22
SLC17A9	0.880299	22
CCNB2	0.880231	22
CYTH4	0.879933	22
IGF2BP3	0.879685	22
SNX24	0.879527	22
HCK	0.879151	22
ARAP1	0.878828	22
CD97	0.878462	22
NCS1	0.878094	22
ASPHD1	0.878067	22
RBM47	0.877435	22
CD9	0.877386	22
MKI67	0.876895	22
EVI2B	0.876455	22
CTSH	0.876395	22
PTPN7	0.876189	22
IRF5	0.875536	22
WAS	0.874919	22
HSD3B7	0.874002	22
ADAP2	0.873916	22
GPNMB	0.873801	22
SLC16A10	0.873622	22
TIAM1	0.872545	22
LILRA2	0.871912	22
C11orf82	0.87191	22
CCDC109B	0.871236	22
CDCA8	0.870988	22
RRM2	0.870712	22
CCL7	0.870265	21
HPGDS	0.869943	22
DFNA5	0.869217	22
GNPDA1	0.868657	22
BUB1B	0.868501	22
PIP4K2A	0.868178	22
DOCK5	0.868174	22
FAM78A	0.866363	22
TFRC	0.866319	22
DOCK2	0.866198	22
SPINT2	0.865803	22
EVL	0.865271	22
C20orf26	0.865105	22
MFSD1	0.865028	22
SAMSN1	0.864796	22
IL2RG	0.864586	21
AIF1	0.86434	22
ACTR3	0.864143	22
CHST15	0.86399	22
ESCO2	0.863715	22
CARD9	0.863409	22
OSBPL3	0.86308	22
HLA.DMB	0.862959	22
CDK18	0.862906	22
KMO	0.862788	22
IL1RN	0.862477	22
TUBA1B	0.862117	22
TDRD6	0.861699	22
SHCBP1	0.861572	22
ETHE1	0.861447	22
STMN1	0.861289	22
ZYX	0.861053	22
OSCAR	0.860923	22
PLEKHO1	0.860839	22
ANLN	0.860065	22
ATP6V0D1	0.859824	21
CDKN3	0.859678	22
FUCA1	0.859248	22
PTPRE	0.859207	22
CHST13	0.859063	22
LCP2	0.858863	22
SLC9A7	0.858725	22
TNNI2	0.858503	22
LOC283143	0.857284	22
HMGA1	0.85709	22
RTN4R	0.856341	22
S100A11	0.856179	22
ADORA3	0.855908	22
GPR137B	0.855869	22
AOAH	0.855798	22
RAD51AP1	0.855691	22
IQGAP3	0.854759	22
CSK	0.85451	22
SLA	0.854255	22
ACP2	0.852984	22
MOSPD1	0.852386	22
RASGRF1	0.852133	22
KIAA1598	0.852108	22
SLC43A3	0.852056	22
SIGLEC7	0.851475	22
ABCG2	0.851069	22
VAV1	0.851042	22
PKM2	0.850938	22
CD37	0.850654	22
TTC39B	0.850623	22
TMEM86A	0.850603	22
TBC1D8	0.85012	22
TGFA	0.850004	22
DMXL2	0.849989	22
M6PR	0.849026	22
CNPY3	0.848918	22
MAFB	0.848518	22
PPM1E	0.848461	22
CALHM2	0.848073	22
BUB1	0.848039	22
ASPM	0.847234	22
CD163	0.846571	22
ID2	0.845847	22
STX4	0.845786	22
CENPF	0.845662	22
LHFPL2	0.845302	20
GPR84	0.845048	22
C19orf38	0.844833	22
TM4SF19.TCTEX1D2	0.844666	22
CDC45	0.84452	22
UBASH3B	0.843807	22
BIRC5	0.843492	22
P2RX1	0.843322	22
RAB11FIP4	0.842421	22
SLC16A6	0.842055	22
RNASET2	0.842018	22
SRC	0.841877	22
TK1	0.841339	22
NRIP3	0.841062	22
C15orf27	0.841047	22
PRPS2	0.840482	22
RBP5	0.839718	22
PLCB2	0.839652	22
PMFBP1	0.839197	22
PDE6G	0.83901	22
MADD	0.838878	22
SRGN	0.838797	22
FABP5	0.838599	22
LILRA3	0.838052	22
MYBL2	0.837913	22
GPR65	0.837902	22
DLGAP5	0.837538	22
SPP1	0.837187	22
CD276	0.836796	22
MYO5A	0.836776	22
PLA2G15	0.836558	22
FAM110A	0.836083	22
NLRP3	0.835687	22
HMMR	0.835569	22
CELSR1	0.835369	22
TPM3	0.834973	22
RARRES1	0.834034	22
KIFC1	0.833945	22
WIPF1	0.833686	22
ZNF710	0.83367	22
MAN2B1	0.833401	22
SLC22A16	0.832885	22
RGS19	0.832881	22
C1QC	0.832813	22
HPS3	0.832588	22
ARL11	0.832301	22
SIGLEC15	0.831497	22
HM13	0.831396	21
KIF20A	0.831295	22
TSPAN33	0.830701	22
DEPDC1	0.830625	22
GNB4	0.830324	21
TTK	0.830135	22
SOAT1	0.829826	22
SLC2A9	0.829749	22
SCIMP	0.829215	22
ARHGAP22	0.829092	22
DPEP2	0.828579	22
CEP55	0.828123	22
EIF4A1	0.8276	22
SH3BGRL	0.827501	21
GINS1	0.827463	22
ZNF267	0.827092	22
KCNK3	0.826656	22
SH2B3	0.826612	22
MYO1F	0.826516	18
APOC1	0.826456	22
MFHAS1	0.824715	19
AKR1B1	0.824673	22
PLBD1	0.823694	22
GTSE1	0.823517	22
IFITM10	0.823038	22
S1PR3	0.822988	22
LAT2	0.822933	22
CYB5R4	0.8228	21
CSTB	0.822639	21
PRKCB	0.822354	22
AURKB	0.821779	22
LYZ	0.82122	22
EVI2A	0.821061	22
PLEKHB2	0.820899	19
PLAU	0.820868	22
TIMP1	0.820625	22
RAB38	0.820541	19
RAP2B	0.820485	21
SLC1A4	0.820155	22
RHOF	0.819769	21
NUF2	0.819663	22
SLC11A1	0.819626	22
DNAJC5B	0.819582	22
CRABP2	0.819353	22
RELT	0.819121	22
GNA13	0.818774	20
NANS	0.818621	19
B3GNT2	0.81782	22
MS4A7	0.816301	22
SNAPC2	0.815825	20
ALOX15B	0.814917	22
MMP12	0.814764	22
HTRA4	0.814718	22
PSTPIP1	0.814551	22
LY9	0.81448	22
GBA	0.814393	22
TMEM123	0.813966	19
KIF23	0.813268	22
PFKFB4	0.813205	18
TFCP2L1	0.812962	22
ATP1A1	0.812244	22
PGBD5	0.812106	22
KCNK6	0.812038	22
SLC6A7	0.811743	22
ZNF804A	0.811638	22
PLXNC1	0.811579	22
ABHD12	0.810806	22
FCGR2A	0.809693	22
ANPEP	0.809185	22
ACTG1	0.808471	21
KBTBD8	0.808177	22
IL10RA	0.80797	22
GK	0.807848	22
ARPC4	0.807034	20
RASGEF1B	0.806045	22
MYO1E	0.805966	22
GALNT7	0.805553	22
MREG	0.805489	22
CLEC4A	0.805255	22
ZWINT	0.804163	22
COQ2	0.803108	22
CFL1	0.802804	21
ATP6V0B	0.802364	21
TLR8	0.80097	22
TRIM36	0.800463	22
SLC36A1	0.800071	22
KIF4A	0.799996	22
FAM20C	0.799915	22
CAMK2B	0.799912	22
MILR1	0.79978	22
SLC39A11	0.799526	22
SEPT9	0.79816	19
LILRA6	0.797836	22
DEPDC1B	0.797773	21
OTUB2	0.796939	22
ACPP	0.79691	22
MAP2K3	0.796884	22
KIF2C	0.796797	22
S100A6	0.796057	22
OTOA	0.795488	22
TMEM102	0.794759	20
MGAT1	0.794429	22
GPR77	0.794034	21
SIRPB1	0.792746	22
RSPO4	0.79227	22
CAB39	0.792204	19
PAK1	0.791841	22
YPEL4	0.791826	22
SEMA7A	0.791458	20
CYP2S1	0.791161	22
TM6SF1	0.790832	22
UCP2	0.790067	22
AGPAT9	0.789845	22
KLF16	0.788329	22
MAD2L1	0.787008	22
RASSF2	0.786895	22
KIAA0226L	0.786538	22
FBXO41	0.785999	21
PBK	0.785525	22
GPRIN3	0.785302	21
SAMHD1	0.784465	16
CDT1	0.784195	22
LY86	0.783214	22
FXYD5	0.782991	20
HAMP	0.782857	21
MFI2	0.782488	22
IL18BP	0.782432	22
NRAS	0.782218	18
PGM2L1	0.781823	22
ESPL1	0.781382	22
AKR1A1	0.781288	21
C11orf45	0.78065	21
FCGR3A	0.779043	22
RAB39A	0.778669	21
OPN3	0.778478	22
DIRAS1	0.778353	22
RNF128	0.778316	22
PILRA	0.777976	22
C6orf192	0.777547	22
SERPINE1	0.776576	22
C14orf169	0.775713	22
SLCO2B1	0.775422	21
FTH1	0.77454	22
GLT25D1	0.774492	20
ACTB	0.773509	19
RAMP1	0.773484	21
BASP1	0.773149	22
KCNE1	0.772804	22
HMGB3	0.772679	22
RAB13	0.772502	22
P2RX7	0.772414	22
C1orf127	0.772073	20
LACTB	0.771805	18
PVRL4	0.771166	22
TACC3	0.770921	21
DAPP1	0.770731	19
ARPC2	0.770234	21
PTCRA	0.769834	22
ST3GAL5	0.769466	22
PPP1CA	0.769241	17
CENPM	0.768539	21
C1QB	0.768428	22
SEL1L3	0.76835	19
TCIRG1	0.768089	19
CDCP1	0.767886	22
BLNK	0.76776	22
HS3ST1	0.767221	22
IER5	0.767191	22
ARMC9	0.767156	22
C1orf96	0.767013	21
CMTM3	0.766679	22
S100A4	0.76638	22
HEATR3	0.765121	22
BMF	0.765105	22
DYRK2	0.764905	15
CLSTN3	0.764821	22
LGALS3	0.764754	22
FAM64A	0.763634	22
TNFRSF1B	0.763573	22
MFSD2A	0.763387	22
RNASE2	0.76331	22
TUBB3	0.76289	22
NAB2	0.762883	22
C14orf109	0.762694	22
MICAL1	0.762497	21
TWF2	0.761979	22
LILRB1	0.761122	22
CD33	0.76045	22
FAM131B	0.760359	22
GABRB2	0.760357	20
UBXN11	0.760237	21
UNC93B1	0.759609	21
DLX3	0.759294	22
SERPINB1	0.758975	16
CD1B	0.758711	22
UBE2C	0.757169	22
FNDC4	0.756319	22
CPVL	0.755529	22
PRSS36	0.754613	22
HCLS1	0.754599	20
P2RY11	0.754485	22
TMEM51	0.754008	22
DOK3	0.752823	22
FAM20A	0.752453	22
IKZF2	0.752217	22
TDRD3	0.752086	21
CD63	0.751515	17
PTBP3	0.751436	19
MTHFD2	0.751015	22
PNP	0.750801	20
VNN1	0.750624	22
PAPLN	0.750245	22
FCHO1	0.750222	21
UTP18	0.749808	22
CDK1	0.749684	22
LTA4H	0.749657	21
PAQR8	0.749361	22
HPSE	0.749244	22
LGI2	0.749243	21
SHANK1	0.748675	22
CYBA	0.748524	21
FZD1	0.746483	20
CD4	0.746066	16
TRIM38	0.745161	22
CSF1R	0.745105	22
CYP1B1	0.744502	22
GSG2	0.744372	22
HSD17B14	0.742035	22
RAB20	0.74173	18
ADORA2B	0.74163	19
KCNJ1	0.741612	22
TMEM98	0.741401	22
TRIM47	0.741084	22
FAM129B	0.738592	21
HK1	0.738296	20
RPP25	0.737141	22
SIRPA	0.737105	22
SQLE	0.737096	21
ATP6AP2	0.736482	12
TMED9	0.736362	15
IL10RB	0.736136	21
ARHGAP11A	0.735044	21
AURKA	0.734392	22
CDCA3	0.733903	22
ERP29	0.733825	12
DOCK3	0.733699	22
FHAD1	0.733505	22
OXER1	0.733007	22
MOXD1	0.732268	22
NR4A3	0.731403	19
TBC1D1	0.730269	14
CXorf26	0.730217	22
IER5L	0.729931	22
ADAMTS8	0.729383	22
IKBKE	0.728231	10
GRIN2D	0.727901	22
CALR	0.72787	15
SHKBP1	0.727262	15
COL6A2	0.72672	22
KLHL6	0.726684	22
PAQR5	0.725543	20
CMTM6	0.724916	14
TPP1	0.72471	22
LINC00256A	0.724279	22
NCAPG	0.723878	22
FLVCR2	0.723235	22
PANX1	0.722879	21
PPP1R18	0.722156	22
PKMYT1	0.721962	21
PLK1	0.720798	22
PSAP	0.720615	12
ARSB	0.720571	21
CCNA2	0.72007	22
E2F3	0.719589	19
PDIA4	0.719457	18
SDC4	0.718337	22
TUBA1A	0.71792	22
CXorf21	0.717754	21
CENPK	0.717399	22
FANCA	0.717386	19
SNAI3	0.716532	22
MANBA	0.716439	22
SLC43A2	0.71623	22
GATM	0.716101	22
TROAP	0.716079	22
B3GNT8	0.716025	11
SETDB2	0.715098	22
JAKMIP2	0.714337	22
ADAMDEC1	0.712863	22
CCL22	0.712373	22
ZG16B	0.712049	22
GALNT12	0.710546	22
PRR11	0.709063	22
IGFLR1	0.708538	22
FUT4	0.70794	14
CYBB	0.707904	19
BAIAP2	0.707808	22
TNFSF15	0.70758	20
PTGS1	0.707502	13
SLC39A8	0.707047	19
FAM105A	0.706211	22
LYN	0.706053	18
NR1H3	0.705963	19
TTYH2	0.705895	22
SLC22A18	0.705127	21
HAPLN4	0.704488	21
TET3	0.703821	22
MARCKS	0.703725	20
HEXA	0.703497	22
ADAM9	0.703201	12
PTPRJ	0.703035	21
GAL	0.702255	22
PIPOX	0.701181	22
PAQR4	0.700869	22
PPP1R9B	0.700523	22
PLB1	0.699862	22
S1PR2	0.699549	22
PTPN22	0.698827	20
ME2	0.697441	21
RIPK3	0.696602	7
PLEK2	0.696391	18
RAB42	0.695442	22
TNC	0.695113	22
MMP8	0.69434	22
MRC1	0.694339	19
FAM214B	0.693395	19
CECR6	0.693237	22
TMSB4X	0.693234	12
FAM213B	0.693097	22
PPAPDC1A	0.692838	22
FN1	0.692423	22
CHIT1	0.692037	22
C1orf85	0.691691	21
RIMS3	0.691619	22
PLXDC2	0.691609	16
SECTM1	0.690157	22
JUNB	0.689824	22
FMNL1	0.689779	22
IL17RA	0.688704	18
C1QA	0.688601	22
A1BG.AS1	0.688174	22
RNF135	0.68802	22
GCNT1	0.686428	17
NDC80	0.686174	20
METTL1	0.686034	7
ACRBP	0.685531	15
DIAPH1	0.685413	22
MS4A14	0.685321	22
ACOT11	0.684405	22
ARHGDIB	0.682666	22
ZMYND15	0.681199	20
ETNK1	0.68087	12
MARCH1	0.680284	18
APOBEC3C	0.679461	21
GAA	0.677928	22
C15orf48	0.674917	22
F5	0.674697	22
SAPCD2	0.674686	21
GNG5	0.674519	18
PADI2	0.674216	16
SLC6A6	0.673783	20
PRSS23	0.672585	22
GMPR	0.672457	18
SLC22A15	0.672336	22
H2AFY2	0.672194	22
SIGLECP3	0.67168	22
SMAP2	0.6714	20
TNFAIP8L2.SCNM1	0.670654	22
SHOX2	0.67052	22
DENND1C	0.67023	16
S100A3	0.670087	22
FCGBP	0.669895	22
INSM1	0.669231	21
MS4A6A	0.668804	20
CD22	0.668762	21
AGPAT4	0.66872	22
CHRNA1	0.668252	22
ARHGAP18	0.667145	19
B3GNT5	0.666949	21
PLK3	0.666581	15
CD14	0.665168	22
BACH1	0.665013	17
MICB	0.664416	22
SLC7A5	0.663593	22
SQRDL	0.663083	14
IGFBP4	0.663033	19
LGMN	0.663024	18
LOC151534	0.662251	22
TPM4	0.662099	22
CRIP1	0.661195	21
HTR7	0.658989	18
CR1	0.658937	21
BMP2K	0.658758	20
CCNB1	0.65753	13
ARRDC4	0.657397	22
LAMP1	0.656103	19
SRGAP3	0.655822	22
ITGA5	0.655548	19
CASS4	0.655203	22
CXADR	0.654877	18
SLC20A1	0.654745	22
GNGT2	0.654735	22
ETNK2	0.653866	20
G6PD	0.653062	22
AMDHD1	0.653046	22
FLJ90757	0.652189	22
MEI1	0.651922	14
GFRA2	0.651752	22
ADRA2B	0.651691	22
ADTRP	0.65107	20
LILRB2	0.650133	21
TPX2	0.649591	15
APLP2	0.649576	22
MCM5	0.64935	11
IL6R	0.647535	19
FTL	0.646876	20
TNFSF8	0.646617	14
PABPC4	0.646613	22
COL9A2	0.644888	22
MR1	0.642193	14
DAGLA	0.642188	22
SSX2IP	0.642165	13
EGR3	0.641705	12
MGAT4B	0.641295	22
GCNT2	0.641274	19
LONRF3	0.640631	15
CARD16	0.639938	22
C7orf73	0.639892	12
PKIB	0.639744	22
TNFAIP6	0.639681	21
PLEKHA4	0.639388	22
THY1	0.639057	18
USP6	0.638908	22
COTL1	0.638514	22
HJURP	0.637984	22
MAF	0.637029	22
GBGT1	0.636911	22
RPL22L1	0.636883	22
ATP6V0C	0.636846	21
TRERF1	0.636415	22
CLCF1	0.635479	20
FAM111B	0.634652	22
TMPRSS13	0.634627	22
MELK	0.634161	22
ADCK2	0.63405	20
A1BG	0.633702	22
ZNF765	0.633564	22
C10orf55	0.633545	20
ELF4	0.633468	22
PRKX	0.632406	22
LPAR5	0.63151	21
ORAI1	0.631423	13
ICAM1	0.630936	22
AMPD3	0.629316	22
FZD10	0.628847	18
GPR39	0.62857	22
PIK3R6	0.628244	22
TPMT	0.627772	19
WDR11	0.627763	11
SLC11A2	0.625874	21
NUDT19	0.625784	20
ADAP1	0.625588	19
ITGAD	0.625177	20
OLR1	0.624145	21
RNH1	0.623422	17
HLA.DMA	0.623069	15
CCL13	0.623017	20
CLEC11A	0.623007	22
SYNGR2	0.622566	6
PREX1	0.622004	21
TP53BP2	0.621318	22
FOLR2	0.620799	21
LPAR2	0.620458	17
PITPNM1	0.619645	22
MSX2	0.618938	21
BHLHE40	0.617631	21
KLK4	0.616878	21
BCL10	0.614325	20
MARCO	0.614196	16
RELL2	0.613229	20
DOT1L	0.613008	15
C3orf14	0.612839	22
SNORA16A	0.612749	21
DUSP18	0.612166	21
C2CD2L	0.610456	21
CCL24	0.610287	22
TYMP	0.607578	15
STAG3	0.6071	22
C9orf167	0.606918	19
SCAMP5	0.604995	22
TFEB	0.60491	21
FCGRT	0.604849	17
TP53I3	0.604679	17
DLG4	0.60429	19
STIP1	0.60341	12
LY6E	0.60338	11
VASN	0.601743	22
C13orf33	0.600968	22
LRRFIP1	0.600778	22
TLR5	0.600375	19
FKBP10	0.600199	15
CDH23	0.600073	22
OAS1	0.599923	19
PSD4	0.599567	18
HMHA1	0.599249	16
VCAM1	0.598883	20
SERINC2	0.598362	22
HLA.DRB1	0.597493	19
FARP1	0.597438	17
PTK6	0.596851	21
CASP1	0.595859	21
ARHGAP25	0.59579	21
RUNX1	0.595747	22
ABCC5	0.595419	22
SH2B2	0.594173	15
CD109	0.59259	14
DAPK1	0.591912	22
KCNQ1	0.591834	19
SERTAD3	0.591764	17
C21orf67	0.591414	15
DNAJB5	0.591162	20
APOC2	0.590236	22
MEX3B	0.590209	21
SIRPB2	0.589158	22
MCM2	0.588216	21
EMILIN1	0.586815	22
UBE2L6	0.584812	19
C15orf23	0.584268	22
ARHGEF2	0.58406	19
PTK7	0.583806	21
SLC35E3	0.582637	21
TDRD9	0.580486	20
ARAP2	0.580231	19
CD274	0.580193	22
SIGLEC14	0.579974	22
MLF1IP	0.57966	21
TAGLN2	0.578823	21
SPN	0.578779	18
SIGLEC5	0.57877	21
ALDH1A2	0.578162	15
ANGPTL6	0.577926	20
FGD2	0.576301	22
ING2	0.575477	13
CRYL1	0.575232	22
CXXC5	0.575006	22
KIAA1804	0.57459	22
MIDN	0.574142	15
DUSP10	0.573659	18
CDS1	0.573498	15
EMR4P	0.570849	15
PLA2G2D	0.570125	20
ZNF385A	0.570094	17
RCSD1	0.568677	22
SH3BP2	0.56773	20
POU2F2	0.56373	9
NIP7	0.562856	22
ZNF589	0.561773	22
TPBG	0.56083	19
PCDHGA12	0.560644	21
IKBIP	0.560532	20
C5orf20	0.559214	18
NT5C2	0.558455	22
MTHFR	0.557199	18
TMEM150B	0.557117	20
AKIP1	0.557048	15
SMPD1	0.556678	12
HLA.DQA1	0.556532	20
SLC7A8	0.556469	22
FOS	0.556305	22
SNTB1	0.555627	20
FCGR2B	0.555227	21
MPEG1	0.553191	14
CCL4	0.553104	22
MMP14	0.552824	8
LAYN	0.551022	22
LXN	0.549151	21
FHL3	0.548802	21
TRIM34	0.548772	18
DNER	0.54833	22
IL4R	0.547967	22
FAM72A	0.547545	20
PIGT	0.546731	14
DRAM1	0.545169	19
BBC3	0.544611	11
SEMA3G	0.543427	22
APOBEC3B	0.541526	19
LRRC8E	0.541061	21
GREM1	0.540917	22
HLA.DQB1	0.53948	20
C1QTNF6	0.53809	22
HSPA1A	0.536848	18
SLC19A1	0.536427	16
ZNF185	0.536378	15
PRDM1	0.535483	21
CD209	0.535259	19
NXF3	0.534664	21
TES	0.533134	18
CTSL2	0.532036	21
ITGAL	0.530479	14
HTRA3	0.529186	14
CDH12	0.528151	22
EZR	0.528142	22
E2F2	0.527257	20
CHST8	0.526108	14
PDIA3P	0.525558	22
YWHAH	0.524807	16
TMEM70	0.524613	18
GGTA1P	0.523949	18
TYMS	0.522221	19
PRRX2	0.522097	15
CCDC99	0.521917	19
HLA.DRA	0.521616	19
BLOC1S2	0.521449	14
PLEKHG4	0.51987	18
RAB3IL1	0.516941	15
ZNF93	0.516731	19
PEPD	0.515294	17
C1orf233	0.515044	16
CTSC	0.513961	16
NEK2	0.513778	12
FGD6	0.512097	15
LSAMP	0.511999	22
ZNF668	0.5068	8
IER3	0.505764	20
MAN2B2	0.504108	20
SEZ6L2	0.503479	22
LOC285972	0.503201	21
FCGR1A	0.50239	21
DISC1	0.502374	21
SLFN11	0.501578	22
HVCN1	0.501192	18
TNFSF12.TNFSF13	0.501082	19
RPSAP9	0.500001	21
PLOD3	0.499929	22
CHRNA7	0.499284	22
APOBEC3F	0.499048	22
B3GNT7	0.498724	19
IL8	0.498523	11
FJX1	0.497939	18
ALOX5AP	0.49553	13
ALDH1A3	0.494266	13
NANOG	0.493819	22
APLN	0.492134	20
SLAMF6	0.491681	19
ADD2	0.49066	22
KCP	0.490595	22
LILRA1	0.490406	22
RASA4	0.489623	20
NDE1	0.488958	22
HS6ST1	0.487347	15
IL10	0.487182	22
HEATR8	0.483977	20
ACSM3	0.483607	6
LOC653786	0.482504	21
CXCL3	0.482495	20
CENPA	0.48082	15
DENND2D	0.480819	12
CDKN2A	0.478094	17
SLC7A1	0.477582	18
OLFML3	0.474978	21
C2orf89	0.474909	19
GOLGA6C	0.473749	14
MBP	0.473472	20
TNFSF14	0.473276	13
C9orf139	0.472966	22
PRR5L	0.471917	15
EYA2	0.470768	21
CCL2	0.470213	6
SEC11C	0.468823	22
HAND2	0.468668	16
EBP	0.467409	7
ARL4C	0.467051	18
PDPN	0.460927	16
WDR76	0.460325	18
LRRN4CL	0.458498	18
PPDPF	0.457094	7
RAB11FIP1	0.456343	10
NPAS2	0.455419	21
SIX2	0.453147	17
ACSF2	0.450118	6
LOC100130705	0.449127	20
C3orf58	0.448979	18
EDA2R	0.448924	9
NR0B1	0.448223	19
CDC6	0.446871	18
LEPREL2	0.445984	10
NINJ1	0.443575	18
PYCR1	0.443334	10
TMEM176A	0.442998	16
TNFAIP2	0.441977	7
LAMC3	0.441314	5
GPR85	0.437315	14
CYP21A2	0.437187	20
PLD4	0.436167	13
ATAD3C	0.435325	9
SIGLEC1	0.4315	19
RIMBP3	0.430668	14
COMP	0.42963	7
CLCNKB	0.429069	7
HAS2.AS1	0.428707	16
MERTK	0.42803	20
C8orf45	0.427833	12
LILRB5	0.426557	20
ANKRD16	0.426382	18
STEAP3	0.425996	20
CHAC1	0.420491	17
AHRR	0.420443	16
GPCPD1	0.419972	7
CCBL2	0.419618	16
CENPL	0.418898	11
BGN	0.418606	19
CD58	0.416772	20
C16orf93	0.413096	22
GALR1	0.408606	16
TCTN2	0.407808	21
RASL10A	0.407654	18
ABHD11-AS1	0.407573	12
COL4A4	0.40643	12
NAAA	0.405739	22
UGDH	0.405661	19
HRH1	0.404535	21
S100A10	0.403343	21
TGFB3	0.402337	15
LIMS3.LOC440895	0.401018	20
MYO1D	0.401008	0
FANCI	0.398631	12
IGFBP6	0.396641	11
SLC35F2	0.39604	21
PDE6B	0.394999	8
C17orf77	0.393657	18
CTNND2	0.393325	14
CCNF	0.392422	3
LOC606724	0.391961	19
NEB	0.391459	18
CYP1A1	0.390184	19
ALPK2	0.386643	20
ICOSLG	0.383249	18
HLA.DPA1	0.382533	15
CA12	0.381451	21
CLEC10A	0.381088	18
LOC100505702	0.380535	19
MGP	0.379966	16
DEFB124	0.379072	15
ARL4D	0.378017	18
SLC1A2	0.377793	20
ZDHHC15	0.376839	19
TNFSF13	0.375596	19
RNF130	0.374668	20
ADAM23	0.372988	21
DSTNP2	0.371138	15
LINGO3	0.368608	14
LOC339524	0.365418	16
DUSP19	0.363814	15
CMIP	0.362777	19
HHIPL1	0.362608	12
ST5	0.362094	21
HSD11B2	0.361838	15
PCDHA9	0.361328	15
PAX3	0.360788	15
SNORA72	0.359138	12
LOC100506433	0.359068	21
CCL18	0.3569	8
PION	0.356152	7
C1orf95	0.355034	16
SLC40A1	0.350932	13
DNASE1L1	0.345042	20
NUDT6	0.344094	8
HIST3H2A	0.341668	15
TMEM79	0.341522	18
HLA.G	0.339699	17
GALNS	0.337599	13
ZNF615	0.33541	18
RAB27A	0.334743	12
TMEM130	0.330957	18
TMEM191A	0.32719	17
VASH1	0.325765	2
CLGN	0.321129	17
CASP8	0.320942	19
C2orf63	0.320689	14
IGSF9	0.320291	20
LOC284889	0.316254	19
WARS	0.316161	14
LOC645752	0.311716	18
LOXL1	0.309886	18
TMEM191C	0.308847	18
GUSBP3	0.300279	17
ITGB8	0.298339	8
CD163L1	0.297212	13
MARVELD3	0.294004	21
CES3	0.283769	20
UBE2F.SCLY	0.283298	17
PAG1	0.281264	13
SERPINA3	0.279667	16
CCDC141	0.27744	10
NAPSA	0.269854	18
SLCO2A1	0.257854	7
CCL8	0.252557	12
GLIS2	0.248416	9
CASP7	0.245303	11
IL27RA	0.24195	5
ADARB2	0.240158	18
MRAP2	0.22849	8
PDE4A	0.188104	4
ABCB5	0.171723	15
KIAA1671	-0.187158	13
CTAGE7P	-0.194223	10
LOC389033	-0.203392	20
DHRS4	-0.203571	15
UHRF1BP1	-0.20371	5
PHOSPHO2	-0.24562	13
LOC284379	-0.246247	19
LOC727849	-0.253355	14
PMS2CL	-0.253541	6
HLA.DRB6	-0.255529	12
SNAPC5	-0.256002	8
C9orf85	-0.260211	8
ABCG1	-0.265354	7
CHAF1A	-0.275842	7
PMEL	-0.276723	5
LEPREL1	-0.279286	12
ARL2.SNX15	-0.28097	18
COX11	-0.285351	17
UPK1B	-0.285503	17
CCDC169.SOHLH2	-0.285838	11
CDK2AP1	-0.286	18
TMEM236	-0.287863	8
SNORA81	-0.289539	16
FAM21B	-0.292416	16
PYGL	-0.297112	18
ADAMTS18	-0.298027	15
MCCC1	-0.29908	7
SHMT1	-0.302845	12
SEC14L4	-0.307103	9
C7orf29	-0.310231	20
LOC650293	-0.313367	14
RYR2	-0.315256	14
HERC2P7	-0.315725	6
NKX3.1	-0.317977	15
NR2F2	-0.319461	13
KRBA2	-0.319505	18
BCL2L11	-0.320891	9
BACH2	-0.320994	21
CPNE4	-0.322163	12
WNT6	-0.322961	13
STEAP1B	-0.323846	16
DZIP1L	-0.324204	2
LOC100505783	-0.324718	19
LINC00476	-0.32561	15
RNASEK.C17ORF49	-0.328104	19
MAGEA10	-0.329683	19
HLA.DQA2	-0.33002	10
HEY2	-0.330932	14
COL4A5	-0.330985	2
TSLP	-0.33164	11
ZNF107	-0.332623	3
FAM86C2P	-0.333893	19
ZNF493	-0.335365	11
METTL21CP1	-0.33675	17
LOC100507577	-0.336818	16
ZNF252	-0.336848	8
ITGB1BP1	-0.342041	8
KLHL30	-0.343384	16
LOC400548	-0.344355	19
STAG3L2	-0.344954	20
SELENBP1	-0.345129	18
LOC441204	-0.346445	16
CDRT4	-0.347458	10
ADRB3	-0.347995	21
ECEL1	-0.348314	15
IGFN1	-0.348568	15
JMJD7.PLA2G4B	-0.349823	15
SSH2	-0.350936	5
TDRD5	-0.351112	2
BTLA	-0.35208	17
INO80B	-0.352407	13
B3GALNT2	-0.354217	16
ZNF680	-0.355651	19
TLCD2	-0.356334	17
KLRF1	-0.360318	5
FGF9	-0.360481	13
GLCCI1	-0.36135	10
CBLN1	-0.362439	19
LSS	-0.3633	10
LOC284023	-0.363347	12
GUCY1A3	-0.363498	18
PAN3.AS1	-0.363811	10
CCT6P3	-0.364719	11
DPYSL4	-0.365084	13
IGJ	-0.366089	19
HSD17B13	-0.366487	20
TCTEX1D1	-0.366902	17
ZNF321P	-0.367321	17
CLEC2L	-0.367526	20
HCG18	-0.370224	7
GPR89C	-0.370518	11
SYNM	-0.370633	22
C1orf126	-0.371604	22
P2RX5.TAX1BP3	-0.371776	19
COX6B2	-0.373406	14
ZNF585A	-0.376408	17
ZNF835	-0.378242	21
DNAL1	-0.378739	21
TMEM140	-0.380397	18
SHROOM2	-0.38265	15
LOC100216479	-0.383206	17
FOXD4	-0.383572	17
C20orf132	-0.384436	18
SMTNL2	-0.384933	14
FANCE	-0.385152	12
CLEC18A	-0.386311	21
FAM162B	-0.389563	22
LIPT1	-0.389787	17
BCL2L15	-0.390784	14
NBR2	-0.392286	19
MKL2	-0.392531	15
RBPMS2	-0.392802	4
GUCY1B3	-0.392851	17
C2orf40	-0.392868	8
C17orf97	-0.393733	21
ASAH2B	-0.393981	22
SLC22A5	-0.394748	14
SLC7A5P2	-0.394766	14
FAM66C	-0.395223	21
SPOCK2	-0.395391	17
ACBD7	-0.395491	22
CABP1	-0.396689	21
FAM91A2	-0.396787	17
RBM20	-0.397307	14
HEBP1	-0.397965	13
MGC3771	-0.400486	15
SVEP1	-0.401092	4
ABCC6P2	-0.401689	17
RPS6KL1	-0.402836	16
PCDHB9	-0.40297	19
LOC219347	-0.403586	21
LOC730091	-0.404126	19
CDKN2AIPNL	-0.405178	13
LOC221442	-0.405211	21
SYCP1	-0.405279	10
NMUR1	-0.405942	10
C11orf80	-0.40789	19
ADK	-0.410486	21
LOC100506599	-0.411207	11
TSHZ1	-0.411268	8
GREB1	-0.412807	15
SLC15A5	-0.413707	13
SLC28A2	-0.414044	13
LOC100132352	-0.414394	18
ATP5S	-0.414837	15
SBDSP1	-0.415344	14
KIAA1324L	-0.415714	12
ZNF526	-0.416004	19
MIAT	-0.416742	18
CNR1	-0.418193	20
ABCA5	-0.418283	14
TSR1	-0.41889	17
LEFTY2	-0.420793	20
ELK2AP	-0.421682	20
AGSK1	-0.423334	22
NRK	-0.423677	14
NRP2	-0.423735	21
GLIPR1L2	-0.424045	20
DCAF16	-0.424689	6
SPATA18	-0.427815	21
LOC100130093	-0.428172	4
SLC7A14	-0.428559	22
RPH3AL	-0.428931	20
MEOX2	-0.429104	13
SCN3B	-0.429231	10
VGLL3	-0.429577	19
FAM182B	-0.430561	21
KANK2	-0.433043	21
SLC6A1	-0.433712	22
CATSPER2P1	-0.433753	15
POM121L8P	-0.436295	19
CEACAM1	-0.436835	21
IGFBP5	-0.437975	13
TRPC4	-0.438562	15
SLA2	-0.438568	22
ACAT1	-0.438607	22
EXD1	-0.439887	8
NECAB1	-0.440184	18
ESR2	-0.4412	20
TBX5	-0.441231	16
GRTP1	-0.442354	11
SEMA3B	-0.44311	10
TBX4	-0.443423	9
LOC100288069	-0.444505	16
PYGM	-0.444723	17
RARB	-0.444828	12
UIMC1	-0.444969	21
CLCNKA	-0.445383	17
DCAKD	-0.446821	21
DMRT2	-0.447262	9
ALDH7A1	-0.447365	15
LINC00087	-0.448301	6
FAM83F	-0.44879	20
SLC16A9	-0.449295	20
EHD2	-0.450222	3
ACOT2	-0.450842	19
ARID5B	-0.450887	17
STARD8	-0.45176	13
KGFLP1	-0.452443	14
C8orf46	-0.452812	22
GUSBP2	-0.452941	20
OMA1	-0.45305	13
PGD	-0.453344	12
DTNA	-0.453595	9
LRRC61	-0.453883	21
IGFBP7	-0.45544	22
PRPH	-0.456595	20
SOX7	-0.457191	18
TLE1	-0.457453	21
LOH12CR2	-0.457971	15
TMIGD2	-0.458371	22
DUOX1	-0.458436	15
DPH3P1	-0.459635	17
WDR52	-0.460869	18
PCDHB12	-0.461262	16
FLJ41484	-0.462443	15
CABLES1	-0.46269	15
MRI1	-0.462729	12
CCDC68	-0.464087	20
SERINC4	-0.464519	21
WNT5B	-0.464713	22
TMTC4	-0.464883	19
GRPEL2	-0.465026	15
LOC100505738	-0.46601	21
MSTN	-0.467777	11
CRLS1	-0.468061	22
ITGA6	-0.470045	21
HIST1H2AC	-0.471222	17
DPPA4	-0.47125	14
CLIC5	-0.471353	20
TRMT2B	-0.472575	8
LOC100507421	-0.474457	22
CTC1	-0.478183	11
UBAC2.AS1	-0.478335	22
PRR15	-0.479042	14
PKNOX2	-0.479359	14
ST6GALNAC3	-0.479467	19
S1PR5	-0.481369	20
MYH2	-0.481451	22
LOC340544	-0.481648	22
ENPP3	-0.482378	15
HOXA7	-0.482629	20
TTC14	-0.482724	8
EPB49	-0.482859	13
REPIN1	-0.482979	17
KCNC4	-0.48305	21
SAA2	-0.483059	12
PECR	-0.483195	7
ZNF160	-0.483209	18
AGMO	-0.483217	19
NAALAD2	-0.484486	13
PITX1	-0.4861	7
MRVI1	-0.486474	19
PDE8B	-0.487173	15
NRIP2	-0.487236	19
RERG	-0.488131	18
MGC16703	-0.488856	21
PTPRK	-0.489215	5
PLEKHG6	-0.489921	22
FGF11	-0.490127	21
PGM5	-0.49074	21
CEBPA	-0.491995	10
DPY19L2P2	-0.492087	17
STOM	-0.49287	5
CXXC4	-0.493304	21
DDX51	-0.493317	18
PPARD	-0.49398	20
LOC286297	-0.495077	19
LPL	-0.495113	19
HOOK2	-0.495657	15
SV2B	-0.497694	22
TMCC3	-0.498442	22
DPP6	-0.499735	21
ISOC1	-0.500028	21
SCN2A	-0.500188	22
ANO2	-0.500574	21
C10orf103	-0.501066	17
WNK3	-0.501674	22
RBM48	-0.501902	20
PARM1	-0.502162	20
OBSCN	-0.503659	17
LDOC1	-0.505577	14
SNORA70	-0.505654	21
SAA1	-0.506117	16
CYB5D1	-0.506157	21
CA8	-0.506301	18
FAM66D	-0.506341	22
AFF3	-0.507103	17
LOC100132215	-0.507673	13
FLJ10038	-0.507928	20
RNF165	-0.508723	14
BMP4	-0.509098	11
LIN52	-0.509971	20
ZNRF3	-0.510362	22
ESRP2	-0.510929	22
NOTCH1	-0.511152	22
HAS3	-0.511825	7
OTUD3	-0.513553	22
FRY	-0.514189	22
TPGS2	-0.514249	20
SLC2A4	-0.514339	20
OSGIN2	-0.514678	20
LOC646278	-0.515434	22
PGM1	-0.516542	17
CSGALNACT1	-0.517524	21
THBS4	-0.51839	20
CACNA2D2	-0.519953	21
PKD2	-0.520225	7
WSCD1	-0.521489	19
TSPAN7	-0.521708	13
SEPT7P2	-0.52173	22
SLC16A14	-0.522046	21
CES4A	-0.522127	3
LOC100335030	-0.522402	19
PARD6G	-0.523145	22
MCC	-0.523256	21
FAM204A	-0.523467	18
OCLN	-0.524323	22
ACYP2	-0.526143	13
TACSTD2	-0.527434	17
PCMTD2	-0.528113	17
PITRM1	-0.528406	22
LOC100505876	-0.529817	16
RGS3	-0.530062	13
FAM86B1	-0.531338	22
NICN1	-0.53257	9
C3orf55	-0.532861	21
LOC284440	-0.533451	16
IRS1	-0.534021	17
RAI1	-0.534482	20
PLEKHM1P	-0.534545	18
FLT1	-0.535045	19
ACO2	-0.535197	11
GPRC5B	-0.535705	21
CNTD2	-0.536342	22
C8orf34	-0.53893	21
USP33	-0.539173	15
NLGN1	-0.539203	16
C1orf213	-0.539292	9
GPD1L	-0.5395	3
FMO2	-0.54187	13
TCF7L2	-0.5429	18
FAM92A3	-0.543276	22
GKAP1	-0.54331	19
MXRA7	-0.543693	19
LOC100132832	-0.544828	20
SLC6A9	-0.545687	22
NDN	-0.545959	17
POM121C	-0.546154	22
LOC100506472	-0.546408	21
LRRTM4	-0.546906	22
SYBU	-0.547354	21
L1TD1	-0.547753	21
REEP2	-0.547924	22
MAP4K3	-0.550328	12
SULT1C4	-0.55235	13
SATB1	-0.553426	10
NQO2	-0.553667	21
BHMT	-0.554219	18
EPB41	-0.55518	19
CCDC69	-0.557482	19
STRADB	-0.557495	22
CYYR1	-0.558615	21
KIF21A	-0.558737	22
APOL6	-0.558948	22
LACTB2	-0.559107	20
STC1	-0.559284	21
PLCH2	-0.559953	22
BTG2	-0.56138	14
FNIP1	-0.564529	19
LOC100505648	-0.565073	6
SEMA6D	-0.565205	21
ADRB1	-0.565534	17
CCDC88C	-0.565723	18
SPARCL1	-0.566669	22
GALNTL2	-0.567139	19
UNC5C	-0.567433	21
FBXW10	-0.568878	21
PAWR	-0.569009	21
PRDM16	-0.569193	21
LOC387646	-0.569505	22
NFS1	-0.569682	16
CCDC102A	-0.570379	21
ALDH1A1	-0.570801	10
OR2A9P	-0.572556	22
LOC386597	-0.572762	20
TSPAN10	-0.57336	22
FBXL20	-0.575219	19
SUCLG1	-0.575719	19
GCFC2	-0.576762	22
LOC100306951	-0.57684	16
LOC100506795	-0.577218	19
AGAP1	-0.577756	18
LOC493754	-0.578389	20
LINC00264	-0.579623	22
GLYAT	-0.580187	10
LOC728558	-0.580298	20
POLI	-0.580519	9
TMEM189	-0.580846	19
SMAD1	-0.580867	22
MARCH3	-0.581099	20
RASSF10	-0.581679	20
EPB41L1	-0.581839	22
GATA3	-0.58267	22
ATPAF1	-0.582755	4
DCUN1D3	-0.583059	15
AIFM2	-0.584831	6
HOXB8	-0.585479	21
MYH1	-0.585493	21
MGEA5	-0.585703	9
ANKRD33B	-0.586697	16
LOC731424	-0.587074	21
FAM47E	-0.587982	17
FASN	-0.588311	22
UPF3A	-0.588727	17
FIGF	-0.589669	5
GRID1	-0.589858	21
C14orf126	-0.591158	22
GNG4	-0.591269	22
C9orf25	-0.591666	20
PDE6A	-0.592004	15
LOC389791	-0.592517	21
ORMDL3	-0.592694	16
TBX3	-0.593223	21
TMC7	-0.594131	18
C1orf198	-0.594677	21
DTX2P1.UPK3BP1.PMS2P11	-0.595192	22
TM7SF2	-0.595728	19
SEL1L2	-0.597928	21
RBPMS	-0.598746	9
GPI	-0.598935	19
SLC35F1	-0.599067	21
PFN2	-0.599087	16
TRDN	-0.599679	22
BAHCC1	-0.600213	16
ZNF611	-0.600577	17
NPR3	-0.601502	21
LHCGR	-0.602014	22
SAA2.SAA4	-0.602477	18
UBA2	-0.604112	10
DMWD	-0.60505	20
NMNAT3	-0.605625	8
INE1	-0.606276	18
TSPAN18	-0.608272	22
IPW	-0.608376	22
PHLDB2	-0.609561	21
PKP1	-0.609789	8
SHANK2	-0.611268	22
PCDH19	-0.611638	22
GPR125	-0.612693	8
SBDS	-0.612882	21
GYG2	-0.615213	9
PBLD	-0.615349	21
TPRG1	-0.616559	22
CACNG8	-0.616929	22
ZNF471	-0.61701	15
EEPD1	-0.61904	22
LOC100506930	-0.619681	22
EIF1AD	-0.619918	22
MASP2	-0.619953	16
TP73.AS1	-0.621403	18
LOC147670	-0.622141	21
PKD1L1	-0.622242	21
FAM107A	-0.622596	22
MYO1C	-0.623301	17
SLC35E2B	-0.624646	21
C10orf58	-0.624891	19
CCDC3	-0.625545	18
BNIPL	-0.625638	22
GOLGA6L6	-0.625702	22
RAB3B	-0.625834	21
LINC00312	-0.626118	21
C6orf123	-0.627177	22
PCDHB2	-0.627413	20
HOXC10	-0.628189	22
MGST1	-0.628716	19
CNTD1	-0.628876	15
HOXC6	-0.629206	21
EPB41L4B	-0.630042	21
EPAS1	-0.63048	19
C20orf7	-0.630502	22
ESR1	-0.630609	12
SEC14L1	-0.631502	22
C15orf2	-0.631881	22
PODXL	-0.632102	17
SLC25A4	-0.632311	21
ALDH2	-0.633609	15
SYNPO2	-0.634211	22
PRKD1	-0.635379	22
ZNF275	-0.635609	22
ADH5	-0.636094	20
TEK	-0.636284	22
CTF1	-0.6363	20
OTUD7B	-0.636677	10
RGS5	-0.636884	22
NAP1L5	-0.637077	19
ERG	-0.637747	22
NME4	-0.637795	21
NPR1	-0.639603	21
DPH1	-0.639818	22
FAM18A	-0.639856	17
MGC45800	-0.640106	22
PIEZO1	-0.640364	15
SPATA9	-0.641187	15
PLAT	-0.64345	22
SLC19A2	-0.644391	8
CADM2	-0.644553	21
F8	-0.645668	21
STXBP1	-0.646633	20
LOC92249	-0.646801	13
AQP7P1	-0.647673	17
GOLGA2	-0.647778	19
SCAND2	-0.648679	22
PAPSS2	-0.648783	16
KLLN	-0.648896	22
ENTPD3	-0.649564	16
EBF2	-0.650123	21
TMEM120B	-0.650148	22
EBF3	-0.650724	22
PPP1R16B	-0.651168	22
PHLPP1	-0.652176	22
GNAI1	-0.652304	21
S1PR1	-0.652665	15
LOC100129794	-0.652681	13
ADCY6	-0.653286	10
ENPP1	-0.653344	20
AIF1L	-0.654075	18
PRPF40B	-0.654361	11
EFNA5	-0.655642	14
PCDHGA3	-0.656823	22
DPY19L2P3	-0.657001	22
GIMAP6	-0.657007	22
MYOM1	-0.657401	21
DMGDH	-0.658498	19
SLC26A7	-0.659798	22
PTPRF	-0.659875	20
AIG1	-0.661105	17
SLC25A45	-0.661284	22
GPT2	-0.661691	21
C3orf26	-0.662022	22
LOC90834	-0.662406	21
PLA2G16	-0.663105	19
DMKN	-0.663259	22
PHKA2	-0.663584	10
PTEN	-0.663962	21
F3	-0.664716	20
LOC100506469	-0.665868	19
STOX1	-0.667309	22
FLJ43390	-0.66884	22
RDH10	-0.669006	22
SLC25A23	-0.669312	22
TUFT1	-0.669746	22
MECOM	-0.670245	21
LIPE	-0.670657	22
INADL	-0.6707	21
LOC100131434	-0.670701	12
TEAD1	-0.671115	13
KLHL21	-0.671175	19
LMTK2	-0.671869	20
SLC1A5	-0.671917	22
WFS1	-0.673185	9
STC2	-0.673411	22
ITGA7	-0.673736	20
TNN	-0.674053	22
C1orf109	-0.674135	16
MTUS1	-0.674366	12
KIAA1217	-0.67557	21
KLHL5	-0.676349	22
DAB2IP	-0.67941	22
ATP1A2	-0.679573	22
TMEM133	-0.680134	22
LOC401093	-0.680692	22
CELSR2	-0.68075	20
GPRASP1	-0.68079	21
DDR1	-0.681966	22
APBB2	-0.68215	22
JAKMIP3	-0.682216	19
SH3BGRL2	-0.682659	22
ACSS3	-0.68279	14
ALPK3	-0.684013	21
PPARG	-0.684814	22
MCAM	-0.686456	20
PROM2	-0.686682	22
MICAL3	-0.687235	9
AQP7	-0.687258	16
SOCS2	-0.687954	22
PRDX6	-0.688689	12
USP30	-0.688875	14
KIF1C	-0.689496	14
SPIN3	-0.693154	21
OR2A20P	-0.693819	21
FZD4	-0.694085	14
PIGP	-0.694285	22
RIC3	-0.695074	22
NFASC	-0.69615	22
ZNF204P	-0.696755	21
PRICKLE2	-0.696868	20
STBD1	-0.699281	22
CTIF	-0.69996	22
MAST4	-0.700579	22
LOC339290	-0.701689	21
FBXO32	-0.703379	20
FZD5	-0.703879	21
TMEM22	-0.704023	21
ACAD11	-0.704294	22
VIP	-0.705626	22
GDF5	-0.707533	22
HEMK1	-0.708828	22
SOCS7	-0.708858	20
SLC5A6	-0.709055	22
CTNNBIP1	-0.712929	17
SASH1	-0.713112	20
LGALS8	-0.713878	22
C1orf21	-0.715979	22
PFKFB1	-0.716315	22
MYO16	-0.717362	22
SH3TC2	-0.71796	22
RGS6	-0.718056	13
ATN1	-0.718151	13
CAND2	-0.718722	22
BNIP3	-0.720342	22
MLLT6	-0.721151	20
LOC286189	-0.721574	22
SLC12A4	-0.72217	11
ADAMTSL3	-0.723438	21
TEAD3	-0.72392	22
KLF8	-0.724519	22
TXLNG	-0.724641	22
ATP7B	-0.724773	22
KLF15	-0.72761	22
SOX6	-0.730849	22
LOC283392	-0.732103	11
ECHDC3	-0.732892	22
NAT8L	-0.73335	12
LOC100286844	-0.734066	22
RHOBTB3	-0.737633	20
STX16	-0.738775	12
FAM71F2	-0.739205	18
AASS	-0.740978	18
TJP1	-0.741311	22
CHCHD3	-0.741635	22
SDPR	-0.74182	22
FBXL18	-0.741928	22
TSPAN6	-0.742811	22
KAZN	-0.743724	22
XPNPEP3	-0.746737	22
KIAA0182	-0.748629	21
SLC6A8	-0.748673	22
PLEKHG5	-0.748786	22
ITSN1	-0.75092	20
PLIN5	-0.752098	22
CYP2C8	-0.752663	22
RBMS2	-0.753296	21
SLC4A4	-0.754601	22
CDNF	-0.755604	22
ARHGEF17	-0.756246	21
ZNF69	-0.756499	22
ANKS1A	-0.757404	22
TNFAIP8	-0.759235	22
ACADL	-0.760166	21
AKAP2	-0.76041	22
EDNRA	-0.764142	22
MYH14	-0.766762	22
NUDT4P1	-0.767497	22
TSEN2	-0.769201	22
TJP2	-0.772835	22
AMOTL2	-0.773422	22
RAPGEF5	-0.775814	22
MARC1	-0.776017	22
NPY1R	-0.776618	22
NPY5R	-0.777458	22
CCDC85A	-0.781003	22
FAM89A	-0.781719	22
DMD	-0.782114	20
MAOA	-0.782896	22
PTPRQ	-0.785937	21
TTPA	-0.788473	20
SYN2	-0.793846	22
FBXO27	-0.795801	22
ARHGEF7	-0.796041	21
PARD3B	-0.796858	21
PTPRM	-0.801887	22
MBD2	-0.801924	22
GABRE	-0.802221	15
PDZD2	-0.805514	22
BHMT2	-0.813907	22
MYH10	-0.815615	17
SPRED2	-0.818113	22
PCLO	-0.82255	22
SLC19A3	-0.827192	22
ATXN2	-0.827715	22
EPB41L4A	-0.830859	22
GPR116	-0.834809	22
COG7	-0.836156	20
KIAA1462	-0.839835	22
CALCOCO1	-0.844388	22
EBF1	-0.854844	21
PLIN1	-0.865456	21

## Sheet: magenta
Table S8B: Genes of the magenta module, ranked by decreasing module membership (MM) from +1 (positive contribution) to -1 (negative contribution).
Stability indicates the number of times the gene is correctly classified in the 22 Jackknife sub-analyses.
Genes listed in the GO category are genes of the module belonging to the given enriched category
Gene ID	MM	Stability		Genes in GO:0007166 "cell surface receptor signaling pathway"			Genes in GO:0005833 "hemoglobin complex"
LCK	0.963761	22		CCR7	chemokine (C-C motif) receptor 7		HBA1, HBA2	hemoglobin, alpha 2; hemoglobin, alpha 1
CD79A	0.952116	22		CD2	CD2 molecule		HBB	hemoglobin, beta
CARD11	0.940302	22		CD247	CD247 molecule		HBD	hemoglobin, delta
PIM2	0.939452	22		CD27	CD27 molecule		HBG1	hemoglobin, gamma A
IL18RAP	0.935084	22		CD3D	CD3d molecule, delta (CD3-TCR complex)		HBG2	hemoglobin, gamma G
BCL11B	0.912673	22		CD3E	CD3e molecule, epsilon (CD3-TCR complex)		HBM	hemoglobin, mu
CD247	0.909122	22		CD7	CD7 molecule		HBQ1	hemoglobin, theta 1
LEF1	0.908952	22		CD79A	CD79a molecule, immunoglobulin-associated alpha
LOC100130231	0.908795	22		CD79B	CD79b molecule, immunoglobulin-associated beta		Erythroid specific genes
MMP25	0.90774	22		CD8A	CD8a molecule		AHSP	erythroid associated factor
FAM129C	0.906093	22		CD8B	CD8b molecule		ALAS2	aminolevulinate, delta-, synthase 2
MYBL1	0.905982	22		CXCR1	interleukin 8 receptor, alpha		SLC4A1	solute carrier family 4, member 1 (Diego blood group)
SLC25A37	0.905311	22		CXCR2	interleukin 8 receptor, beta
ITK	0.903404	22		CYSLTR2	cysteinyl leukotriene receptor 2
ACAP1	0.902979	22		DGKA	diacylglycerol kinase, alpha 80kDa
MS4A1	0.901743	22		F2RL1	coagulation factor II (thrombin) receptor-like 1
KIAA0748	0.899013	22		FFAR2	free fatty acid receptor 2
CD6	0.898892	21		FKBP8	FK506 binding protein 8, 38kDa
LTB	0.898521	22		FRAT2	frequently rearranged in advanced T-cell lymphomas 2
PHOSPHO1	0.894225	22		GPR114	G protein-coupled receptor 114
TMC8	0.889466	22		GPR171	G protein-coupled receptor 171
CD3E	0.884912	22		GPR63	G protein-coupled receptor 63
ZAP70	0.884002	22		GPR97	G protein-coupled receptor 97
ALAS2	0.882537	22		GPRC5C	G protein-coupled receptor, family C, group 5, member C
RLTPR	0.882101	22		IL18RAP	interleukin 18 receptor accessory protein
CD7	0.881902	22		IL7R	interleukin 7 receptor
SYTL1	0.881631	21		ITGA2B	integrin, alpha 2b (platelet glycoprotein IIb of IIb/IIIa complex, antigen CD41)
CXCR1	0.878851	22		ITGB7	integrin, beta 7
CD5	0.877147	22		JAK3	Janus kinase 3
SLAMF1	0.876838	22		KLRB1	killer cell lectin-like receptor subfamily B, member 1
PRKCQ	0.87446	22		LCK	lymphocyte-specific protein tyrosine kinase
CXCR2	0.871331	19		LEF1	lymphoid enhancer-binding factor 1
RASGRP1	0.867144	22		LEPR	leptin receptor
SLC4A1	0.865184	22		LPHN3	latrophilin 3
SH2D1A	0.86058	22		LTK	leukocyte receptor tyrosine kinase
HBM	0.857497	22		NOTCH3	Notch homolog 3 (Drosophila)
TBC1D10C	0.855135	21		PF4	platelet factor 4
GPR97	0.855011	22		PPBP	pro-platelet basic protein (chemokine (C-X-C motif) ligand 7)
KLRB1	0.851374	22		PRKCZ	protein kinase C, zeta
TCF7	0.841988	22		PTCH1	patched homolog 1 (Drosophila)
GPR114	0.836778	21		PTENP1	phosphatase and tensin homolog; phosphatase and tensin homolog pseudogene 1
KRT8	0.835356	22		PTPRD	protein tyrosine phosphatase, receptor type, D
CD8B	0.831587	22		S1PR4	sphingosine-1-phosphate receptor 4
FCRL3	0.826916	21		SKAP1	src kinase associated phosphoprotein 1
HBA1	0.821976	22		SLC9A3R1	solute carrier family 9 (sodium/hydrogen exchanger), member 3 regulator 1
IL7R	0.815277	22		SMO	smoothened homolog (Drosophila)
HBB	0.814401	22		TCF7	transcription factor 7 (T-cell specific, HMG-box)
SAMD3	0.813059	22		THEMIS	thymocyte selection pathway associated
CD27	0.81274	21		ZAP70	zeta-chain (TCR) associated protein kinase 70kDa
MAL	0.81216	22
HBD	0.811983	22
CCR7	0.811675	22
ZNF831	0.811397	22
CMTM5	0.808776	22
DGKA	0.807202	21
UBASH3A	0.807023	21
PRF1	0.80691	21
LOC439949	0.803687	22
NLRC3	0.802304	21
SEPT1	0.799496	22
LOC100506779	0.79387	22
R3HDM4	0.790942	18
CYFIP2	0.788151	22
CD3D	0.778726	22
HBG2	0.778355	20
HBQ1	0.776545	22
SLC9A3R1	0.776254	22
AHSP	0.775702	22
GRAP2	0.774801	21
CD2	0.768295	22
SKAP1	0.766917	21
CPA1	0.763268	22
TRIM58	0.762214	21
PTPRCAP	0.754862	19
HBG1	0.75433	22
JAK3	0.753715	18
GNLY	0.751978	21
S1PR4	0.751872	18
SP140	0.745242	21
SIT1	0.744197	19
TBX21	0.740166	21
CST7	0.737322	21
TRAT1	0.736467	22
SH2D1B	0.73571	22
IL2RB	0.735533	21
ATP2A3	0.73432	21
KCNA3	0.728392	19
FKBP8	0.725887	20
ITGB7	0.724469	21
GZMB	0.72022	21
GPR171	0.718422	22
SBK1	0.716901	22
ABHD12B	0.716334	21
ITGA2B	0.705822	20
MYL4	0.702692	21
SLC38A1	0.700987	18
NRGN	0.699578	16
CYSLTR2	0.699305	21
FAM46C	0.698088	18
PDZK1IP1	0.690654	17
PF4	0.687586	19
APBA2	0.687354	8
PPBP	0.678264	19
CCDC64	0.677005	17
HBA2	0.672237	16
TNFRSF10C	0.671013	18
F2RL1	0.667623	19
HOXA11	0.663378	21
CHST5	0.657175	19
KDM5B.AS1	0.653064	18
ZNF573	0.65257	16
GZMA	0.6521	21
LTK	0.650321	19
THEMIS	0.649829	18
MCOLN2	0.642792	20
APOBEC3D	0.640785	21
C9orf116	0.637325	11
REC8	0.636632	19
NELL2	0.635048	19
MZB1	0.631951	20
LOC729683	0.63162	18
C21orf7	0.621221	8
PLAC8	0.619989	22
EOMES	0.619982	16
LOC653501	0.619438	17
KIF21B	0.613757	11
GPRC5C	0.612897	17
MTRNR2L6	0.611346	21
MTRNR2L2	0.602345	20
MTRNR2L1	0.600954	20
NKG7	0.600601	20
COPG2	0.597582	16
SCARNA15	0.593522	7
CTLA4	0.591748	17
FFAR2	0.589184	19
LOC388588	0.588204	20
MTRNR2L8	0.585109	21
PDE7A	0.583925	14
OR7E14P	0.582194	12
ANO9	0.581318	19
ZNF670	0.580902	18
TARP	0.577185	16
CD8A	0.576866	20
SLC9B1	0.576687	8
GZMM	0.573436	19
LRG1	0.567338	17
HOPX	0.563428	19
PRKCZ	0.560629	21
NAMPT	0.549128	16
UBD	0.546735	12
RUNX2	0.544257	16
LOC100288428	0.543928	13
CCT6B	0.540568	20
FASLG	0.538719	21
GZMK	0.531623	19
GLRX	0.521642	8
C1orf106	0.520736	19
POU2AF1	0.516025	19
TSNAX.DISC1	0.512562	10
PTPN20A	0.508225	15
PTPN20B	0.508225	15
HIST2H2BF	0.505134	16
ITIH4	0.498822	4
ANK1	0.498794	21
ZNF557	0.495496	13
GTPBP5	0.494634	5
SNX22	0.492723	19
ZNF808	0.487977	8
ZNF124	0.484789	16
FRAT2	0.484303	14
ANKRD22	0.474051	19
CSF2RA	0.464729	11
CPB1	0.457804	10
MTRNR2L10	0.445969	20
CD79B	0.442455	18
PIR.FIGF	0.43825	6
HAR1A	0.410885	9
C17orf76.AS1	0.40405	5
ZNF419	0.398473	10
SLC2A1	0.392352	1
CD40LG	0.382368	9
GSG1	0.381812	15
SERF1A	0.374558	15
CHRNE	0.364657	15
ATF7IP2	0.354196	1
C19orf33	0.346097	5
HECW2	0.338956	0
ZNF587B	0.317757	3
MYLK.AS1	0.316614	6
CBS	0.307406	6
SPATA7	0.220238	1
PCDHB16	-0.156391	0
PLAC2	-0.182935	3
DOC2B	-0.215581	14
PTCH1	-0.291621	1
LPHN3	-0.316	8
ZNF850	-0.332721	8
TMX2.CTNND1	-0.35167	5
PTPRD	-0.366622	3
REM1	-0.375094	11
C4orf32	-0.384084	10
ZNF823	-0.38495	4
FAM21C	-0.388727	5
ZNF677	-0.393285	7
PGA5	-0.394437	13
C21orf62	-0.404948	13
SMO	-0.414727	12
LEPR	-0.437129	8
NSA2	-0.438674	14
NOTCH3	-0.447424	9
FSBP	-0.448901	16
PCDHGB3	-0.473688	7
PGA3	-0.476545	16
LOC100128750	-0.481222	10
FLCN	-0.50137	18
MFGE8	-0.507306	10
OR2A7	-0.51062	14
PCDHB14	-0.51094	19
DZANK1	-0.515023	6
C8orf44.SGK3	-0.516324	6
UQCRHL	-0.521439	21
FAS	-0.531473	14
LHPP	-0.532199	8
PLEKHA8P1	-0.53554	16
NDRG3	-0.53636	7
C1QL3	-0.540146	20
HSCB	-0.540173	8
SEPT5	-0.554709	19
BRD3	-0.560574	16
CTAGE4	-0.569529	18
SAMD5	-0.57585	14
NSL1	-0.577252	17
ATG10	-0.579982	20
GPR63	-0.584022	19
GJA9.MYCBP	-0.587945	21
HSP90AB1	-0.598381	8
RUNDC3B	-0.603524	12
PTENP1	-0.606714	16
SH3RF3	-0.606786	11
SCAMP4	-0.617433	17
PCDHGC3	-0.64823	7
PLXNB2	-0.653791	21
CYFIP1	-0.654454	19
ORC6	-0.655996	20
SMPDL3A	-0.66486	21
NIPA1	-0.682389	21

## Sheet: tan
Table S8C: Genes of the tan module, ranked by decreasing module membership (MM) from +1 (positive contribution) to -1 (negative contribution).
Stability indicates the number of times the gene is correctly classified in the 22 Jackknife sub-analyses.
Genes listed in the GO category are genes of the module belonging to the given enriched category
Gene ID	MM	Stability		Genes in GO:0006952 "defense response"
S100A9	0.961523	22		ALOX5	arachidonate 5-lipoxygenase
S100A8	0.955862	22		APAF1	apoptotic peptidase activating factor 1
CSF3R	0.955077	22		CCR2	chemokine (C-C motif) receptor 2
RGS2	0.950659	22		CD1D	CD1d molecule
FPR1	0.948397	22		CD48	CD48 molecule
BIN2	0.944184	22		CFP	complement factor properdin
S100A12	0.941023	22		CLEC7A	C-type lectin domain family 7, member A
GLT1D1	0.935109	22		CORO1A	coronin, actin binding protein, 1A
RGS18	0.927807	22		CSF3R	colony stimulating factor 3 receptor (granulocyte)
TRAF3IP3	0.92654	18		CX3CR1	chemokine (C-X3-C motif) receptor 1
NFE2	0.923584	22		CXCR4	chemokine (C-X-C motif) receptor 4
VNN2	0.921313	22		FPR2	formyl peptide receptor 2
SERPINA1	0.910472	22		IL1B	interleukin 1, beta
RASSF5	0.910101	22		KCNJ8	potassium inwardly-rectifying channel, subfamily J, member 8
GAPT	0.905399	22		LY75	CD302 molecule; lymphocyte antigen 75
SELL	0.902941	18		MEFV	Mediterranean fever
IKZF1	0.900517	22		NCF1, NCF1C	neutrophil cytosolic factor 1; neutrophil cytosolic factor 1C pseudogene
AMICA1	0.897426	21		NOD2	nucleotide-binding oligomerization domain containing 2
TUBB1	0.897401	22		NOS2	nitric oxide synthase 2, inducible
CD48	0.895426	22		PROK2	prokineticin 2
NOD2	0.885405	22		PTAFR	platelet-activating factor receptor
FAM65B	0.884137	18		PTPRC	protein tyrosine phosphatase, receptor type, C
PTPRC	0.882213	21		S100A12	S100 calcium binding protein A12
LST1	0.881448	22		S100A8	S100 calcium binding protein A8
TREM1	0.87925	22		S100A9	S100 calcium binding protein A9
PIK3CD	0.878621	22		SERPINA1	serpin peptidase inhibitor, clade A (alpha-1 antiproteinase, antitrypsin), member 1
PARP15	0.877482	21		SNCA	synuclein, alpha (non A4 component of amyloid precursor)
FCN1	0.876709	22		TLR1	toll-like receptor 1
MXD1	0.876266	22		TLR2	toll-like receptor 2
APOBEC3A	0.875998	22		TLR6	toll-like receptor 6
TSPAN32	0.874795	22
TMEM71	0.869706	21
FYB	0.86819	21
CLEC12B	0.865965	22
CYTIP	0.864309	22
IL1B	0.862517	22
CD1D	0.862515	15
CSF2RB	0.861155	22
CCR2	0.859213	22
FCGR3B	0.858489	17
MYCL1	0.855414	21
CD300LF	0.852064	21
ITGA4	0.845323	22
PROK2	0.843299	15
CLEC12A	0.838194	17
CD300E	0.837037	22
ARHGAP9	0.834293	22
CFP	0.832944	21
AMPD2	0.824847	19
SORL1	0.823265	21
CD244	0.819482	21
LIMD2	0.819194	22
ANKRD44	0.818337	22
SELPLG	0.815949	16
NUP210	0.814925	21
GCA	0.814696	20
LILRA5	0.813471	14
MST4	0.81191	21
ADAM8	0.808735	22
ALOX5	0.807984	22
MGAM	0.806035	18
CLEC7A	0.804342	20
PTAFR	0.803435	6
C11orf21	0.803372	22
HAL	0.800507	21
USP15	0.797468	19
CLEC4E	0.796321	22
CD101	0.793221	21
CORO1A	0.789327	21
PMAIP1	0.786882	18
BIRC3	0.78295	21
SNX20	0.78178	17
MYO1G	0.778602	21
FGD3	0.776649	18
NCF1B	0.775711	22
CXCR4	0.775708	22
TLR1	0.77547	14
EMR1	0.770365	22
FPR2	0.767628	20
TLR2	0.763377	22
HSH2D	0.763142	18
TAGAP	0.761225	17
TXK	0.750965	19
PIK3CG	0.747333	11
PTPLAD2	0.746588	13
SEMA4D	0.744417	18
CLEC5A	0.742218	22
RNF149	0.737549	11
SNCA	0.734284	6
GBP5	0.73392	17
CLECL1	0.72934	15
C16orf54	0.725921	21
KCNJ15	0.725889	16
TMEM154	0.72516	21
NCF1	0.72468	20
SEPT6	0.717538	13
TLR6	0.713632	14
AP1S2	0.709864	10
RUNX3	0.708687	22
HSPA6	0.708296	21
IL1R2	0.699457	22
IRF1	0.697563	19
EFHC2	0.697483	17
ADAM28	0.696556	14
CEACAM4	0.692452	22
CX3CR1	0.687849	21
ASGR2	0.687344	17
HLA.DOB	0.686509	9
IL21R	0.668587	15
TNFRSF9	0.668229	22
SLCO4C1	0.666272	21
TSPAN5	0.662198	20
LY75	0.655976	12
SGK3	0.646757	8
ADAM19	0.646689	21
PARP14	0.642059	21
FBN2	0.640494	4
SPDYE8P	0.638126	19
ERMN	0.636359	15
FAM26F	0.635487	13
SEMA4A	0.63279	8
SIGLEC10	0.628823	22
CDA	0.626509	22
LGALS2	0.616605	17
DOCK8	0.613361	10
MRE11A	0.599105	6
LOC100505746	0.580139	10
ZNF845	0.57625	10
RAP1GAP2	0.56621	15
NLRP12	0.558454	20
RGS14	0.557073	11
KCNC3	0.546659	19
FAM179A	0.546	12
NCF1C	0.544494	19
GALC	0.541148	1
FLJ35282	0.540541	7
CHD1L	0.538149	19
FAM35B2	0.524639	11
MEFV	0.520181	19
APAF1	0.516512	20
SNORA52	0.51204	20
NPHS1	0.492645	16
LOC286467	0.476739	18
MANEAL	0.465517	9
SMA5	0.452347	12
RPS10P7	0.452083	10
SLC24A4	0.45004	15
CCDC163P	0.445669	16
SPATA13	0.442145	16
FAM90A1	0.438223	6
GPRASP2	0.427898	15
PPAPDC1B	0.42696	7
PCDHB19P	0.411057	16
FAM117B	0.409297	20
SYT15	0.40275	19
RGPD2	0.398286	16
VPREB3	0.372127	11
SGOL1	0.368946	9
LOC100306975	0.353919	2
C4orf21	0.350726	6
RASA4P	0.344121	14
RETN	0.324931	8
ZNF415	-0.335797	11
RAB15	-0.338153	6
FUT6	-0.358988	9
ZNF385D	-0.361463	3
JAG1	-0.36927	17
LOC729264	-0.385657	12
MGC14436	-0.411941	13
AICDA	-0.417414	19
CD82	-0.431474	11
C1orf210	-0.437968	4
FAM66E	-0.449531	13
MTX2	-0.454804	17
NOS2	-0.461297	14
ELN	-0.482137	4
C9orf40	-0.489246	10
MCF2L2	-0.497474	17
LOC100287616	-0.506329	15
CBWD5	-0.51379	14
STEAP4	-0.524437	16
C2orf27A	-0.526064	12
SLC29A4	-0.539208	16
CRYZ	-0.540645	19
ZNRD1.AS1	-0.551041	7
TUBGCP5	-0.583308	13
GUSBP4	-0.5852	22
PCDHA4	-0.59645	22
BCR	-0.598864	8
VENTX	-0.618568	3
GPC3	-0.626673	15
CCDC148	-0.632928	22
EFHD1	-0.634757	17
FBLN5	-0.642513	21
TCF7L1	-0.664705	4
ALDH4A1	-0.675583	10
KIAA0355	-0.688419	7
PALM	-0.713904	17
LOC100131089	-0.728665	18
METTL4	-0.755719	19
KCNJ8	-0.772356	22
HOXC5	-0.806928	22
PDZRN3	-0.851465	22

## Sheet: darkmagenta
Table S8D: Genes of the darkmagenta module, ranked by decreasing module membership (MM) from +1 (positive contribution) to -1 (negative contribution).
Stability indicates the number of times the gene is correctly classified in the 22 Jackknife sub-analyses.
Genes listed in the GO category are genes of the module belonging to the given enriched category
Gene ID	MM	Stability		Genes in G0:0007398 "ectoderm development"
KRT15	0.979305	22		CALML5	calmodulin-like 5
FLG	0.942345	22		COL17A1	collagen, type XVII, alpha 1
TFAP2A	0.931293	22		COL7A1	collagen, type VII, alpha 1
SCEL	0.92234	22		CST6	cystatin E/M
FLG2	0.91055	22		DSP	desmoplakin
CDSN	0.902826	22		EVPL	envoplakin
KRT5	0.882349	22		FLG	filaggrin
COL7A1	0.87736	22		IRF6	interferon regulatory factor 6
COL17A1	0.867367	22		KRT1	keratin 1
EPS8L1	0.85722	22		KRT10	keratin 10
SFN	0.848408	22		KRT14	keratin 14
DSP	0.844245	21		KRT15	keratin 15
KRT10	0.840972	22		KRT2	keratin 2
TRIM29	0.829194	22		KRT5	keratin 5
EVPL	0.82717	22		LOR	loricrin
S100A14	0.821002	22		SCEL	sciellin
KRT77	0.813712	22		SFN	stratifin
CLDN1	0.81344	22		TFAP2A	transcription factor AP-2 alpha (activating enhancer binding protein 2 alpha)
KRT2	0.8117	21		TP63	tumor protein p63
SBSN	0.808233	21
LGALS7B	0.805921	21
LY6D	0.802834	21
KRTDAP	0.797964	21
C12orf39	0.796554	15
CALML5	0.777582	21
DSC3	0.771786	22
FGFR3	0.770894	21
LGALS7	0.765749	21
LOC283547	0.752949	21
FXYD3	0.747751	21
IRF6	0.746409	22
TNFRSF19	0.745444	18
LAD1	0.723903	22
C1orf115	0.723144	1
CST6	0.717558	21
LOC650623	0.714248	7
KRT14	0.711971	21
KRT1	0.709641	21
SPICE1	0.708779	21
TP63	0.70515	21
HSPB2.C11orf52	0.701096	18
CALML3	0.699043	5
SLC14A2	0.697037	21
LYPD3	0.689676	22
ARL15	0.675617	10
EPCAM	0.655952	19
PKP3	0.650794	19
FZD3	0.637487	15
LINC00167	0.627209	15
GATC	0.611253	9
LOC284751	0.604293	21
ANXA8L2	0.599287	21
DSG1	0.597413	21
LOR	0.588823	21
SFTPD	0.578058	5
MYLK	0.56335	4
CDHR1	0.561853	18
GRIA1	0.552918	10
LOC100506388	0.545995	16
RND2	0.544068	0
TP73	0.537499	9
RGPD6	0.532064	1
KL	0.524255	0
HEYL	0.524193	3
GJA5	0.516342	18
VEGFB	0.50006	0
C9orf125	0.499683	2
ESRG	0.477868	0
TNFSF9	0.439901	21
SH3GL1P1	0.384396	0
GEN1	0.376463	21
PCDHA11	0.370062	2
CDR1	0.367528	1
ARMCX5.GPRASP2	0.358564	15
CDH13	0.28163	7
DSN1	-0.228941	1
CD3G	-0.32724	2
CLSPN	-0.383935	2
HDDC2	-0.400666	10
LOC100287177	-0.460266	16
WIPF3	-0.464765	0
CBR3.AS1	-0.504747	11
CILP2	-0.520567	20
CHRAC1	-0.534506	0
C4A	-0.538721	21
MRPS18C	-0.56702	20
C4B	-0.580607	21
LPAL2	-0.606498	1
PLA2G2A	-0.627404	18
COL16A1	-0.633957	11
SUMF2	-0.647596	7
PRC1	-0.655847	0
C11orf52	-0.726646	21
LINC00514	-0.726749	21

## Sheet: paleturquoise
Table S8E: Genes of the paleturquoise module, ranked by decreasing module membership (MM) from +1 (positive contribution) to -1 (negative contribution).
Stability indicates the number of times the gene is correctly classified in the 22 Jackknife sub-analyses.
Genes listed in the GO category are genes of the module belonging to the given enriched category
Gene ID	MM	Stability		Genes in GO:0006351 "transcription"
NIPBL	0.963261	22		AEBP2	AE binding protein 2
ARFGEF2	0.946905	22		AFF4	AF4/FMR2 family, member 4
NCOA2	0.946388	22		ASCC3	activating signal cointegrator 1 complex subunit 3
ZNF354C	0.946277	22		ASXL2	additional sex combs like 2 (Drosophila)
SLK	0.936334	22		ATF7IP	activating transcription factor 7 interacting protein
LRCH3	0.936028	22		ATXN3	ataxin 3
CTDSPL2	0.932249	22		BBX	bobby sox homolog (Drosophila)
NF1	0.926518	22		BDP1	B double prime 1, subunit of RNA polymerase III transcription initiation factor IIIB
LATS1	0.926291	22		BPTF	bromodomain PHD finger transcription factor
ATE1	0.925277	22		BRWD1	bromodomain and WD repeat domain containing 1
STAG1	0.921959	22		CASP8AP2	caspase 8 associated protein 2
SPIN1	0.921722	22		CHD9	chromodomain helicase DNA binding protein 9
GNAQ	0.920745	22		CLOCK	clock homolog (mouse)
DIAPH2	0.918142	22		CREB1	cAMP responsive element binding protein 1
TTBK2	0.915596	22		DENND4A	DENN/MADD domain containing 4A
SPOPL	0.914394	22		DMRT3	doublesex and mab-3 related transcription factor 3
RC3H2	0.912668	22		ELK3	ELK3, ETS-domain protein (SRF accessory protein 2)
ANKIB1	0.912091	22		FOXN2	forkhead box N2
TMED8	0.910807	22		FRYL	FRY-like
HIPK3	0.909978	22		FUBP1	far upstream element (FUSE) binding protein 1
VPS13B	0.909459	21		GABPA	GA binding protein transcription factor, alpha subunit 60kDa
MYO9A	0.909321	22		GTF2A1	general transcription factor IIA, 1, 19/37kDa
ZNF12	0.907567	22		HIPK3	homeodomain interacting protein kinase 3
TAOK1	0.902721	22		HR	hairless homolog (mouse)
ARHGAP5	0.901155	22		IKZF5	IKAROS family zinc finger 5 (Pegasus)
SNX13	0.892759	22		JMJD1C	jumonji domain containing 1C
FAM171B	0.89191	22		KAT2B	K(lysine) acetyltransferase 2B
RAB11FIP2	0.891872	22		KLF12	Kruppel-like factor 12
DPP8	0.890662	22		KLF3	Kruppel-like factor 3 (basic)
IREB2	0.889705	21		MAML2	mastermind-like 2 (Drosophila)
PIAS1	0.889567	22		MED13	mediator complex subunit 13
MAP3K2	0.888741	22		MED8	mediator complex subunit 8
QSER1	0.886992	22		MOV10	Mov10, Moloney leukemia virus 10, homolog (mouse)
CPNE3	0.886861	21		MSC	musculin (activated B-cell factor-1)
DMXL1	0.886327	22		MYCBP2	MYC binding protein 2
EGFR	0.885012	20		NCOA2	nuclear receptor coactivator 2
PPM1L	0.884843	22		NR3C1	nuclear receptor subfamily 3, group C, member 1 (glucocorticoid receptor)
BIRC6	0.884208	22		PBRM1	polybromo 1
MAN2A1	0.883475	22		PBX3	pre-B-cell leukemia homeobox 3
STAG2	0.882833	22		PCGF5	polycomb group ring finger 5
C10orf118	0.88189	22		PHF20	PHD finger protein 20
GTF2A1	0.88161	22		PIAS1	protein inhibitor of activated STAT, 1
C14orf49	0.880016	22		RB1	retinoblastoma 1
RSF1	0.878931	22		RBL2	retinoblastoma-like 2 (p130)
C9orf102	0.878327	21		RBPJ	recombination signal binding protein for immunoglobulin kappa J region
JMJD1C	0.877574	22		REST	RE1-silencing transcription factor
STRN	0.876773	19		RORA	RAR-related orphan receptor A
PCGF5	0.875448	22		RSC1A1	regulatory solute carrier protein, family 1, member 1
KCNT2	0.874465	21		RSF1	remodeling and spacing factor 1
PTPRG	0.873006	22		SCXA, SCXB	scleraxis homolog A (mouse); scleraxis homolog B (mouse)
CDKL5	0.872226	22		SHOX	short stature homeobox
LRRC58	0.87151	21		SMAD5	SMAD family member 5
OIP5.AS1	0.869753	20		SOX5	SRY (sex determining region Y)-box 5
KIAA1430	0.868825	21		SUV39H2	suppressor of variegation 3-9 homolog 2 (Drosophila)
ATF7IP	0.867087	22		TRIP11	hypothetical LOC341378; thyroid hormone receptor interactor 11
PJA2	0.866788	7		TRPS1	trichorhinophalangeal syndrome I
TRIP11	0.865738	21		ZBTB10	zinc finger and BTB domain containing 10
SOX5	0.865672	22		ZBTB38	zinc finger and BTB domain containing 38
FEM1B	0.863415	22		ZFHX4	zinc finger homeobox 4
MARCH6	0.862823	20		ZFP30	zinc finger protein 30 homolog (mouse)
RANBP2	0.862281	22		ZKSCAN1	zinc finger with KRAB and SCAN domains 1
NR3C1	0.861611	18		ZNF117	zinc finger protein 117
ZNF148	0.861318	22		ZNF12	postmeiotic segregation increased 2-like 3; zinc finger protein 12
MAML2	0.860632	22		ZNF138	zinc finger protein 138
AFF4	0.858916	14		ZNF148	zinc finger protein 148
FNIP2	0.858287	22		ZNF155	zinc finger protein 155
BBX	0.858272	22		ZNF177	zinc finger protein 177
ATP11B	0.857691	20		ZNF217	zinc finger protein 217
NHLRC2	0.856764	22		ZNF24	zinc finger protein 24
STT3B	0.856575	20		ZNF292	zinc finger protein 292
ROCK2	0.856489	20		ZNF354C	zinc finger protein 354C
SCYL2	0.855713	22		ZNF430	zinc finger protein 430
RNF150	0.853281	22		ZNF433	zinc finger protein 433
KIF2A	0.853061	21		ZNF521	zinc finger protein 521
CASP8AP2	0.852436	22		ZNF544	zinc finger protein 544
RBL2	0.851153	19		ZNF555	zinc finger protein 555
ATRX	0.851088	22		ZNF595	zinc finger protein 595
AVL9	0.850851	22		ZNF644	zinc finger protein 644
G2E3	0.850332	22		ZNF699	zinc finger protein 699
RASA2	0.849841	22		ZNF714	zinc finger protein 714
APPL1	0.849411	21		ZNF764	zinc finger protein 764
PFN1P2	0.848339	22		ZNF780B	zinc finger protein 780B
FAM199X	0.847604	22		ZNF790	zinc finger protein 790
C5orf42	0.8441	22		ZNF791	zinc finger protein 791
PCDH18	0.843788	20		ZNF81	zinc finger protein 81
ZNF699	0.842806	22		ZXDB	zinc finger, X-linked, duplicated B
SHPRH	0.842067	22
ASXL2	0.841187	22
ZNF24	0.841063	18
MED13	0.840905	22
TNPO1	0.840879	21
ALS2CR8	0.839492	22
TTC37	0.839292	19
ANKRD50	0.839004	19
MKLN1	0.837554	22
NBPF10	0.837021	22
IKZF5	0.835994	21
BPTF	0.835673	16
KLHL11	0.834966	19
REV3L	0.834901	22
PIK3CA	0.834476	18
DNAJB14	0.833916	21
SMCHD1	0.833911	22
OSBPL8	0.832854	22
ROCK1	0.83241	18
LPP	0.831989	16
IL6ST	0.83195	22
TBCEL	0.831072	22
ZNF704	0.83065	21
CLOCK	0.829041	20
KIAA0232	0.828565	17
FRS2	0.824359	7
FAM73A	0.823645	12
CHD9	0.822739	22
BDP1	0.821673	21
ZNF292	0.819965	21
MAN1A2	0.818133	15
PBRM1	0.81717	16
PRKCA	0.816969	22
LRP6	0.816154	13
MPP7	0.815631	13
PTER	0.814119	8
ZBED6	0.814048	22
LTN1	0.812142	22
MIB1	0.810306	22
RSC1A1	0.808512	22
ZNF81	0.807594	22
KAT2B	0.807511	20
DENND4A	0.807204	21
KIAA1109	0.806276	21
CPSF6	0.805444	20
ZFHX4	0.802904	22
RORA	0.801804	16
ATXN1	0.801644	19
ZFC3H1	0.800522	22
ITSN2	0.799484	18
DENND5B	0.799482	20
PRKAR2A	0.799451	15
XPO1	0.798696	19
CD302	0.798216	11
AVPR1A	0.796564	22
RBM43	0.796455	18
GLCE	0.796407	16
PHF20	0.795184	6
UBXN7	0.793528	22
ZNF521	0.792405	17
RB1	0.792173	12
GALNT4	0.792133	10
PDZD8	0.791553	16
GABPA	0.791526	18
ASCC3	0.789461	12
SMAD5	0.787768	22
CAPN7	0.785855	17
BRAF	0.784885	22
FRMD6	0.78488	20
MAB21L3	0.784341	22
ZBTB38	0.783774	16
PRKAR1A	0.783102	7
FUBP1	0.782452	17
ASTN2	0.782318	22
TTC3	0.782315	20
BRWD1	0.7819	20
ZNF791	0.781829	19
RECQL	0.781581	18
SMG1	0.781293	22
PRKDC	0.778452	15
GFRA1	0.776146	21
CNTN1	0.772782	17
CELF2	0.772248	12
CPD	0.772173	20
KIAA1432	0.771372	16
ACAP2	0.770637	18
AKAP11	0.768672	22
REST	0.768409	16
ATP7A	0.767352	15
BROX	0.765976	4
KLF3	0.765695	22
MOB1B	0.765462	21
SECISBP2L	0.764639	18
LOC641298	0.763014	22
DDR2	0.762155	19
BOD1L	0.761145	14
ZNF217	0.759725	20
CREB1	0.758869	20
LOC647979	0.757358	5
SETBP1	0.753688	18
PCNX	0.752265	21
KCND3	0.748148	22
ITGA1	0.747052	13
USP24	0.746713	18
FRYL	0.746247	22
RPS6KA3	0.745501	5
HEATR1	0.745487	2
KLF12	0.745295	12
LOC100294145	0.744998	1
NHSL2	0.744982	22
SUV39H2	0.744595	16
ZNF816	0.743861	13
PIK3C2A	0.742271	22
SEL1L	0.741634	6
PRKG1	0.741554	7
HCG11	0.740977	8
MCTP2	0.740213	21
CCDC50	0.740082	22
MOB1A	0.739568	2
DPY19L4	0.738526	7
DYNC2H1	0.73549	22
TRPS1	0.735164	3
LIN7A	0.733368	16
CAMSAP2	0.73283	20
LPIN2	0.73214	7
SLC26A2	0.731104	22
ATAD2B	0.730953	22
PRICKLE1	0.729766	9
NIPAL2	0.729706	2
IPO5	0.72908	7
PIKFYVE	0.72643	22
XRN1	0.726417	17
DDI2	0.725878	10
C1orf168	0.724094	21
DPYD	0.723682	20
IFT80	0.722859	6
EIF2AK2	0.722494	19
PTAR1	0.722317	13
LRP4	0.72168	2
CCDC39	0.720193	20
NDFIP1	0.719968	2
CFH	0.718979	15
FAM13B	0.718739	0
PLCL2	0.717835	5
REXO1L1	0.715877	22
TXNDC16	0.715587	21
CERS6	0.711098	9
TMEM30A	0.710724	20
DNM3OS	0.709586	19
ARL5B	0.70814	21
GMCL1	0.707043	3
ST8SIA1	0.706144	20
RFX7	0.70308	22
HEATR5A	0.702699	21
ZNF644	0.701548	19
ZKSCAN1	0.700284	15
MYCBP2	0.699382	4
FOXN2	0.698606	22
NEGR1	0.698538	14
C15orf38	0.697132	2
GDA	0.696885	22
LOC389834	0.6966	21
TET2	0.695025	22
YES1	0.693442	18
ZXDB	0.692295	18
GSK3B	0.69115	11
C14orf118	0.690217	20
ZBTB10	0.688782	3
ELK3	0.688337	21
SCD5	0.683008	19
AGL	0.679259	18
SPIN4	0.678402	21
FGD4	0.675739	12
SAMD8	0.675132	12
RECK	0.670906	6
CYBRD1	0.669981	4
VPS13A	0.669786	20
C11orf92	0.669248	18
VPS13C	0.665357	9
PVRL3	0.664243	5
ADCY2	0.658404	6
SLC46A1	0.658337	0
IGSF10	0.657912	3
RNF19A	0.655334	1
ZNF117	0.655253	22
NBEA	0.655046	16
PGAP1	0.650164	16
RASSF8	0.64848	13
KITLG	0.646356	17
C12orf35	0.64497	20
C6orf72	0.64273	3
MPHOSPH9	0.639988	4
ATP8A1	0.638102	22
SIGLEC6	0.637371	11
ERCC4	0.636139	5
POLR2M	0.635243	7
ACVR1	0.634068	2
TMOD2	0.629765	22
C21orf91	0.629361	21
ZNF658	0.627451	10
SLC9A7P1	0.6244	19
RAPGEF6	0.620525	22
ZNF595	0.613793	4
SOS1	0.611352	6
SIGLEC8	0.607219	11
ZNF555	0.602897	14
SLFN5	0.600948	1
RPL23AP53	0.59723	21
FAM208B	0.595937	21
ATP1B4	0.594747	18
SLC35F5	0.584071	0
CAST	0.583777	1
ZNF780B	0.583749	16
MGAT4A	0.583494	4
RBPJ	0.574616	6
VAMP4	0.571288	11
FKBP7	0.562759	5
PHACTR3	0.554354	18
AEBP2	0.551388	2
GVINP1	0.550229	21
NDNF	0.548252	22
TBC1D4	0.546401	20
NAPEPLD	0.543058	16
SEC1	0.543035	12
FLJ45445	0.540811	21
LINC00260	0.52731	21
ZNF714	0.515938	19
SLITRK4	0.497043	18
ZNF764	0.492179	18
ZNF790	0.486872	20
LOC100132287	0.479753	20
LOC100132062	0.479532	20
SVIL	0.468686	12
LOC100133161	0.466989	20
SLC38A11	0.465531	18
GCC2	0.463642	15
STYX	0.461785	12
STOX2	0.459169	20
TC2N	0.458051	20
DPY19L2P4	0.453147	18
GPR82	0.449378	11
LRRC34	0.448367	14
DACT3	0.448365	14
SCN3A	0.444666	17
ATP5J2.PTCD1	0.442452	14
ZNF84	0.440854	12
NUPL1	0.440529	14
ZNF430	0.43727	18
SNORA4	0.428449	21
MPV17L	0.424051	14
POM121L4P	0.4205	21
SHOX	0.417192	22
LOC100233156	0.403768	20
DNM1P46	0.403753	19
TRIM4	0.403136	11
RASGRF2	0.395176	20
C14orf39	0.389165	20
CCDC73	0.387679	13
SKIV2L2	0.387189	1
LOC151475	0.386208	20
CXCL9	0.386195	20
IRX5	0.37551	3
ZFP30	0.373915	16
GYS2	0.371641	16
FCER1A	0.370554	18
SRL	0.370033	16
ZNF138	0.368434	18
LRRC4B	0.367004	13
CEP44	0.365306	16
ELTD1	0.364773	16
SYNDIG1	0.363865	19
RRN3P2	0.362802	16
ATXN3	0.35826	19
PCDHB7	0.352615	3
DLEU2	0.351576	17
C1orf140	0.349115	10
ZBTB7C	0.345747	15
LAMP3	0.344494	11
CCDC165	0.343563	18
CHI3L2	0.341228	15
PLEKHA8	0.320495	16
PBX3	0.297689	2
FHL5	0.294689	18
CEP135	0.26487	18
KCNS3	0.216663	3
ETFA	0.209481	9
VIPR2	0.112609	1
LOC643623	0.0799697	1
MTHFS	-0.0143923	0
GJB2	-0.175003	1
C9orf174	-0.188854	3
OPRL1	-0.253707	21
MGRN1	-0.258197	5
FAM72D	-0.294843	14
AP1M2	-0.30165	1
HIST2H2BC	-0.302628	21
ZNF155	-0.312176	17
ARMCX5	-0.323727	15
HR	-0.326098	9
FAM95B1	-0.339983	15
PRSS35	-0.349135	20
HIST1H4J	-0.356849	19
DTX4	-0.366087	14
PDZK1	-0.386123	20
LOC650368	-0.39562	22
PCDHGC5	-0.408361	9
IL17RE	-0.41198	18
LOC100292680	-0.412339	8
ZNF815	-0.415271	20
SCXA	-0.424985	15
SCXB	-0.424985	15
GPR172A	-0.432622	18
CTU2	-0.433571	1
ACOX3	-0.434936	17
CIDECP	-0.437114	4
LYSMD4	-0.443616	15
DTX2	-0.445396	8
MT1DP	-0.454411	20
LOC90499	-0.456829	16
TMEM17	-0.457534	19
FSTL3	-0.463271	21
LY6H	-0.465817	17
NIT2	-0.472702	0
ANKLE1	-0.490725	13
LOC100505967	-0.494349	13
MSC	-0.500593	1
DBNDD1	-0.500643	13
SNX15	-0.501973	20
NEK8	-0.507787	6
TAX1BP3	-0.507855	21
C16orf89	-0.510265	7
AIPL1	-0.513777	22
PRELID2	-0.519414	18
ENDOG	-0.521092	1
ZNF433	-0.531117	15
DMRT3	-0.543672	10
GSDMA	-0.546385	21
NUDT18	-0.548099	1
MGC72080	-0.551819	18
TMEM160	-0.557982	21
CHST2	-0.562786	4
QRICH2	-0.572317	1
ZNF544	-0.578664	21
SNORA44	-0.587104	19
RHBDD3	-0.59986	2
MOV10	-0.602337	0
PSMD8	-0.608765	8
JMJD5	-0.611578	3
C7orf43	-0.614616	1
HTRA1	-0.618521	2
MED8	-0.618618	3
MORC2.AS1	-0.626033	17
SRM	-0.628481	5
COMT	-0.634334	11
RABL2B	-0.638241	19
MYL9	-0.638984	20
CAPNS1	-0.641887	4
RPP38	-0.645013	21
PTCD1	-0.650187	22
POR	-0.650858	10
SWSAP1	-0.655665	22
FADS3	-0.658388	3
TMPRSS5	-0.660923	2
CYTH2	-0.662041	2
INPP1	-0.662923	1
CEL	-0.667886	2
TAGLN	-0.674801	22
HMOX2	-0.677976	7
MGMT	-0.683293	5
TRADD	-0.685811	10
TCN2	-0.694453	22
TMEM214	-0.702113	22
CLIP3	-0.704293	22
GRK5	-0.705063	20
SULT1A3	-0.70529	17
SULT1A4	-0.70529	17
DDX55	-0.706925	10
CENPO	-0.708554	11
GPSM1	-0.708908	12
B4GALT7	-0.709337	4
CYR61	-0.709628	22
PCSK7	-0.710184	22
KIAA0415	-0.71533	1
PPP2R3B.AS1	-0.71843	22
NAA10	-0.722992	1
MIEN1	-0.726654	1
FAM100A	-0.735026	5
EFCAB4A	-0.738514	2
ZNF177	-0.741734	10
TDRD10	-0.742914	1
YIF1A	-0.744049	8
FFAR3	-0.748478	11
ABCD1	-0.748965	5
PPP4C	-0.752773	3
ADAD2	-0.752823	7
BSG	-0.755356	6
EPOR	-0.755433	5
IL3RA	-0.761525	6
RABEP2	-0.764241	4
RRAS	-0.76732	5
RRBP1	-0.767664	19
ACSS1	-0.770675	18
PRKCDBP	-0.771127	20
H2AFJ	-0.771324	12
MVP	-0.771948	19
NOC4L	-0.787401	8
LOC100188947	-0.788309	13
USE1	-0.794428	5
RCN3	-0.798908	22
CCDC124	-0.802829	9
CDK11B	-0.80713	7
LOC100134317	-0.812436	22
LOC728392	-0.826387	17
C15orf63	-0.837299	20
NRN1L	-0.861182	17
SMTN	-0.862458	18
THAP8	-0.867235	14

## Sheet: skyblue
Table S8F: Genes of the skyblue module, ranked by decreasing module membership (MM) from +1 (positive contribution) to -1 (negative contribution).
Stability indicates the number of times the gene is correctly classified in the 22 Jackknife sub-analyses.
Genes listed in the GO category are genes of the module belonging to the given enriched category
Gene ID	MM	Stability		Genes in GO:0005576 "extracellular region"			Genes in GO:0031226 "intrinsic to plasma membrane"
PAMR1	0.912493	22		ADAMTS16	ADAM metallopeptidase with thrombospondin type 1 motif, 16		AQP1	aquaporin 1 (Colton blood group)
TNXB	0.891177	22		C1QTNF2	C1q and tumor necrosis factor related protein 2		CD55	CD55 molecule, decay accelerating factor for complement (Cromer blood group)
PI16	0.889307	22		C1QTNF4	C1q and tumor necrosis factor related protein 4		CD70	CD70 molecule
SCARA5	0.889095	21		CCL23	chemokine (C-C motif) ligand 23		EPHA4	EPH receptor A4
CD55	0.884557	20		CD70	CD70 molecule		F10	coagulation factor X
CD70	0.882114	21		CILP	cartilage intermediate layer protein, nucleotide pyrophosphohydrolase		GPR12	G protein-coupled receptor 12
GPR133	0.874524	21		F10	coagulation factor X		GPRC5A	G protein-coupled receptor, family C, group 5, member A
CILP	0.863071	21		FAM19A5	family with sequence similarity 19 (chemokine (C-C motif)-like), member A5		KCNK1	potassium channel, subfamily K, member 1
VIT	0.85745	21		FBLN1	fibulin 1		KCNRG	potassium channel regulator
SPSB4	0.847381	20		MATN4	matrilin 4		NRXN3	neurexin 3
PTHLH	0.84035	19		OGN	osteoglycin		PCDHA2	protocadherin alpha 2
C17orf58	0.835236	22		PAMR1	peptidase domain containing associated with muscle regeneration 1		PROCR	protein C receptor, endothelial (EPCR)
TPPP3	0.833054	18		PI16	peptidase inhibitor 16		SCARA5	scavenger receptor class A, member 5 (putative)
PROCR	0.829676	21		PTHLH	parathyroid hormone-like hormone		SCN8A	sodium channel, voltage gated, type VIII, alpha subunit
HUNK	0.821428	20		PXDNL	peroxidasin homolog (Drosophila)-like
SLC17A7	0.818148	22		SLPI	secretory leukocyte peptidase inhibitor
RARG	0.817047	20		VIT	vitrin
GPR12	0.792831	17		WNT10B	wingless-type MMTV integration site family, member 10B
DACT2	0.792031	20
DBNDD2	0.782073	12
OGN	0.77677	18
KCNK1	0.772025	19
SH3PXD2B	0.771852	17
MATN4	0.769993	21
ABI3BP	0.768423	19
FBLN1	0.766063	13
WSCD2	0.764913	15
FRMPD1	0.763038	21
F10	0.76143	14
DBN1	0.752271	13
FAM19A5	0.751347	21
ADAMTS16	0.746758	17
SLPI	0.744092	20
HSD3BP4	0.743905	11
B3GNT9	0.736496	20
WNT10B	0.7339	21
PDLIM4	0.72613	20
CCDC34	0.718585	9
C1QTNF2	0.709141	11
MTMR11	0.699372	20
PCNXL2	0.685228	7
RXRG	0.66534	4
PXDNL	0.657282	11
HIC1	0.656618	19
NHSL1	0.639364	12
PANK1	0.630291	18
VSTM2L	0.625346	8
C1QTNF4	0.610992	14
KCNIP3	0.607778	18
LINC00341	0.59136	6
RFX2	0.586536	16
GPRC5A	0.579584	17
LOC441666	0.57629	21
CCL23	0.569637	20
MAFG	0.568829	14
CD24	0.565676	20
STON2	0.557091	4
PIEZO2	0.544112	18
LOC100505806	0.541441	7
CYP2C18	0.536327	6
DKFZP686I15217	0.49847	6
SDK1	0.450307	7
SERF1B	-0.424932	4
PCDHA2	-0.442038	8
RWDD2A	-0.449201	9
GMEB1	-0.482711	16
IGF2BP2	-0.487238	1
SMN2	-0.48861	18
AQP1	-0.510576	8
SPIN2B	-0.530188	11
EBPL	-0.532533	3
KIAA1549	-0.535594	13
PLCB1	-0.549871	13
LOC100128822	-0.551501	3
NRXN3	-0.553751	3
KIAA1045	-0.583289	10
EPHA4	-0.585347	5
EXOG	-0.603841	11
SCN8A	-0.628149	5
C17orf96	-0.628996	18
HIST1H2BC	-0.643271	21
KCNRG	-0.664718	19
POU5F1P3	-0.699327	17
TRPM3	-0.714938	18
MAPK8IP2	-0.730503	20
PPFIBP2	-0.779372	19
C12orf68	-0.784669	13
LOXHD1	-0.787516	19

## Sheet: steelblue
Table S8G: Genes of the steelblue module, ranked by decreasing module membership (MM) from +1 (positive contribution) to -1 (negative contribution).
Stability indicates the number of times the gene is correctly classified in the 22 Jackknife sub-analyses.
Genes listed in the GO category are genes of the module belonging to the given enriched category
Gene ID	MM	Stability		Genes in GO:0005576 "extracellular region"
PPL	0.939219	21		ADAMTSL1	ADAMTS-like 1
PDGFRA	0.930476	20		AEBP1	AE binding protein 1
C1R	0.907664	18		C1S	complement component 1, s subcomponent
DCN	0.889761	19		C3	similar to Complement C3 precursor; complement component 3; hypothetical protein LOC100133511
MAN1C1	0.884967	22		CHL1	cell adhesion molecule with homology to L1CAM (close homolog of L1)
AHNAK2	0.884772	21		CMA1	chymase 1, mast cell
ITGBL1	0.880034	19		CP	ceruloplasmin (ferroxidase)
CTSK	0.874561	18		CTHRC1	collagen triple helix repeat containing 1
PTGIS	0.861806	21		CTSK	cathepsin K
PTGES	0.859913	21		CXCL10	chemokine (C-X-C motif) ligand 10
GAS1	0.858788	17		CXCL11	chemokine (C-X-C motif) ligand 11
C1S	0.854719	17		CXCL14	chemokine (C-X-C motif) ligand 14
FGF14	0.851525	20		DCN	decorin
PTGFR	0.84881	21		ECM1	extracellular matrix protein 1
ECM1	0.840828	17		GDF10	growth differentiation factor 10
IGDCC4	0.837343	22		GDF6	growth differentiation factor 6
DCLK1	0.834421	22		IGFBP3	insulin-like growth factor binding protein 3
CPA3	0.833427	22		ITGBL1	integrin, beta-like 1 (with EGF-like repeat domains)
GLT8D2	0.830371	21		MASP1	mannan-binding lectin serine peptidase 1 (C4/C2 activating component of Ra-reactive factor)
CTHRC1	0.82739	17		MFAP4	microfibrillar-associated protein 4
CHL1	0.82726	19		MMP2	matrix metallopeptidase 2 (gelatinase A, 72kDa gelatinase, 72kDa type IV collagenase)
SEMA3D	0.82629	14		OLFML1	olfactomedin-like 1
CXCL14	0.822923	19		SEMA3D	sema domain, immunoglobulin domain (Ig), short basic domain, secreted, (semaphorin) 3D
VASH2	0.822019	22		SPOCK1	sparc/osteonectin, cwcv and kazal-like domains proteoglycan (testican) 1
SRPX	0.819432	22		THBS2	thrombospondin 2
TPSB2	0.817527	19		TPSAB1, TPSB2	tryptase alpha/beta 1; tryptase beta 2
CTSG	0.816827	22		WNT2B	wingless-type MMTV integration site family, member 2B
MS4A2	0.808889	22
TPSAB1	0.803559	22
THBS2	0.798492	20
NUDT11	0.789404	21
CP	0.787648	16
HPGD	0.786887	22
PRRX1	0.784545	13
RGS13	0.776821	22
SNED1	0.770498	6
ASB13	0.768884	10
OLFML1	0.765093	15
PLXNA1	0.760411	21
ADAMTSL1	0.750305	14
CMA1	0.726685	22
FPGT.TNNI3K	0.723771	11
MMP2	0.708896	18
C14orf132	0.704758	16
STIL	0.695725	15
IL17RD	0.694896	13
IGFBP3	0.694471	2
WASF1	0.679082	15
MFAP4	0.670016	11
HDC	0.659681	16
C3	0.652267	17
GDF6	0.651774	10
TPST1	0.64937	2
SYNGR1	0.648287	11
OSR2	0.636925	9
AEBP1	0.630353	12
CCNB1IP1	0.621365	16
PLP2	0.618102	14
BHLHE22	0.61148	15
OSR1	0.605459	8
WDR17	0.594755	7
CCDC8	0.592072	2
MASP1	0.591623	11
SPOCK1	0.591065	0
LOC729737	0.575536	3
C1orf186	0.56093	13
GDF10	0.551219	8
CFB	0.547777	4
ZNF503	0.53158	6
BCORL1	0.519932	10
LOC645166	0.51581	21
LOC100128788	0.506537	11
IRX3	0.491332	3
CARD14	0.488315	11
SNORD22	0.466658	12
SDCBP2	0.449351	8
CXCL11	0.429043	5
LOC100507178	0.424962	13
LOC653566	0.424564	6
LINC00487	0.397918	6
AP3B2	0.396249	5
CXCL10	0.351899	3
TIAM2	0.327481	13
GCFC1.AS1	-0.404245	3
TRPM6	-0.4171	7
LOC100133920	-0.458704	8
SPDYE7P	-0.4906	10
ANKDD1A	-0.515386	4
MEF2BNB.MEF2B	-0.517382	7
BTN3A2	-0.534908	5
FLJ45340	-0.535105	10
CYP1A2	-0.545366	9
SLC16A4	-0.552423	2
BAG3	-0.55813	0
IQSEC3	-0.583948	5
PPA1	-0.600353	3
WIPI1	-0.606968	1
WNT2B	-0.623707	0
PCDHGB1	-0.627188	10
STK17B	-0.64081	1
TMEM138	-0.655384	8
MAP1LC3B2	-0.658975	16
MYOM2	-0.673023	14
LOC100861402	-0.682997	11
MYBBP1A	-0.68721	1
MAP6	-0.709225	1
DIRC3	-0.737054	17
COPG1	-0.77832	1

## Sheet: violet
Table S8H: Genes of the violet module, ranked by decreasing module membership (MM) from +1 (positive contribution) to -1 (negative contribution).
Stability indicates the number of times the gene is correctly classified in the 22 Jackknife sub-analyses.
Genes listed in the GO category are genes of the module belonging to the given enriched category
Gene ID	MM	Stability		Genes in GO:0008610 "lipid biosynthetic process"			Genes in GO:0006631 "fatty acid metabolic process"
ACLY	0.912011	21		ACACA	acetyl-Coenzyme A carboxylase alpha		AACS	acetoacetyl-CoA synthetase
FADS1	0.911037	21		ACLY	ATP citrate lyase		ACACA	acetyl-Coenzyme A carboxylase alpha
ACACA	0.898005	17		ACSL3	acyl-CoA synthetase long-chain family member 3		ACSL3	acyl-CoA synthetase long-chain family member 3
LPIN1	0.897532	22		ACSS2	acyl-CoA synthetase short-chain family member 2		CPT1A	carnitine palmitoyltransferase 1A (liver)
ATP2B4	0.896041	17		DHCR24	24-dehydrocholesterol reductase		ELOVL5	ELOVL family member 5, elongation of long chain fatty acids (FEN1/Elo2, SUR4/Elo3-like, yeast)
FADS2	0.893781	22		DHCR7	7-dehydrocholesterol reductase		ELOVL6	ELOVL family member 6, elongation of long chain fatty acids (FEN1/Elo2, SUR4/Elo3-like, yeast)
GPAM	0.885106	19		ELOVL5	ELOVL family member 5, elongation of long chain fatty acids (FEN1/Elo2, SUR4/Elo3-like, yeast)		FABP4	fatty acid binding protein 4, adipocyte
AACS	0.883711	21		ELOVL6	ELOVL family member 6, elongation of long chain fatty acids (FEN1/Elo2, SUR4/Elo3-like, yeast)		FADS1	fatty acid desaturase 1
SREBF1	0.879392	19		FADS1	fatty acid desaturase 1		FADS2	fatty acid desaturase 2
INSIG1	0.878621	21		FADS2	fatty acid desaturase 2		GPAM	glycerol-3-phosphate acyltransferase, mitochondrial
CYCS	0.877808	21		GPAM	glycerol-3-phosphate acyltransferase, mitochondrial		PLA2G4B	JMJD7-PLA2G4B readthrough transcript; phospholipase A2, group IVB (cytosolic); jumonji domain containing 7
MME	0.865891	20		HMGCS1	3-hydroxy-3-methylglutaryl-Coenzyme A synthase 1 (soluble)
LGALS12	0.856298	20		IDI1	isopentenyl-diphosphate delta isomerase 1
CLCA2	0.851182	17		LPCAT3	lysophosphatidylcholine acyltransferase 3		Genes in GO:0008203 "cholesterol metabolic process"
DLAT	0.846077	21		MVD	mevalonate (diphospho) decarboxylase		CETP	cholesteryl ester transfer protein, plasma
ELOVL6	0.841279	17		NSDHL	NAD(P) dependent steroid dehydrogenase-like		DHCR24	24-dehydrocholesterol reductase
APBB1IP	0.83893	21		PNPLA3	patatin-like phospholipase domain containing 3		DHCR7	7-dehydrocholesterol reductase
DHCR7	0.824099	21					HMGCS1	3-hydroxy-3-methylglutaryl-Coenzyme A synthase 1 (soluble)
ECHDC1	0.822731	21					IDI1	isopentenyl-diphosphate delta isomerase 1
TANC2	0.820775	16					INSIG1	insulin induced gene 1
SPTSSA	0.820579	13					MVD	mevalonate (diphospho) decarboxylase
ME1	0.819509	13					NSDHL	NAD(P) dependent steroid dehydrogenase-like
HCAR2	0.81755	19					SREBF1	sterol regulatory element binding transcription factor 1
LOC100130872	0.816595	21
ACSL3	0.814242	5
IDI1	0.812434	19
KIAA0408	0.812373	21
ELOVL5	0.806372	13
NXPH4	0.806264	21
ACSS2	0.805419	9
LPCAT3	0.799685	21
DHCR24	0.780166	20
MRPL19	0.779743	16
ARHGEF40	0.77908	16
CYP3A4	0.777289	19
SRCRB4D	0.77009	11
TMEM135	0.765109	13
LINC00263	0.76364	20
EHF	0.75752	15
PRUNE2	0.755473	17
SLC2A6	0.753909	14
PNPLA3	0.750004	21
MCM10	0.741409	21
CDO1	0.736966	21
IDH1	0.734948	13
FCN2	0.728247	10
HMGCS1	0.727741	20
DBI	0.725259	9
CNTN6	0.725056	11
LOC149837	0.718882	21
KLHDC10	0.715537	14
GYPC	0.710846	20
MVD	0.707039	6
CLMN	0.705376	10
THRSP	0.704073	15
FAT3	0.701346	10
CDH6	0.700696	12
LYRM7	0.687134	3
P2RY8	0.679239	17
CRHR2	0.676357	13
SPDYE5	0.637106	19
FGF18	0.624832	17
SLC2A5	0.621989	15
SCN5A	0.611444	15
POLR1A	0.569822	11
NSDHL	0.56251	1
ADAMTS9	0.561555	9
LINC00242	0.561162	16
LMO4	0.545555	4
SERPINI1	0.527806	9
CETP	0.516981	8
NID2	0.501356	11
BANP	0.474737	7
C14orf23	0.457657	12
INTS4L1	0.449045	12
MDH1	0.417417	8
HOXB.AS3	-0.437926	8
CHST9.AS1	-0.506617	6
C10orf32.AS3MT	-0.526059	10
TTC7B	-0.555189	5
ALDH3A1	-0.560796	14
EFHB	-0.574718	11
FABP4	-0.592608	10
CTSF	-0.609019	16
KIAA1755	-0.623072	2
MSH5	-0.630524	7
METTL21B	-0.638728	9
YPEL1	-0.638801	8
IL34	-0.645956	11
PLCXD3	-0.666806	17
ZNF286A	-0.66901	18
OVGP1	-0.66918	14
C19orf29.AS1	-0.695591	12
EFHC1	-0.698616	21
C1QTNF9B.AS1	-0.717099	20
EPS8L2	-0.726466	19
SLC39A4	-0.729629	19
DIO3OS	-0.740352	12
FAM122C	-0.746232	19
CPT1A	-0.747907	13
IMPA2	-0.806954	17
PLA2G4B	-0.822832	8

## Sheet: plum
Table S8I: Genes of the plum module, ranked by decreasing module membership (MM) from +1 (positive contribution) to -1 (negative contribution).
Stability indicates the number of times the gene is correctly classified in the 22 Jackknife sub-analyses.
Genes listed in the GO category are genes of the module belonging to the given enriched category
Gene ID	MM	Stability		Genes in GO:0009615 "Response to virus"
IFIH1	0.883653	22		DDX58	DEAD (Asp-Glu-Ala-Asp) box polypeptide 58
IFI44L	0.869579	22		IFI44	interferon-induced protein 44
IFI44	0.847543	22		IFIH1	interferon induced with helicase C domain 1
ISG15	0.836808	14		IRF7	interferon regulatory factor 7
HERC6	0.82644	22		ISG15	ISG15 ubiquitin-like modifier
IFI27	0.819281	16		MX1	myxovirus (influenza virus) resistance 1, interferon-inducible protein p78 (mouse)
OAS2	0.814369	22		MX2	myxovirus (influenza virus) resistance 2 (mouse)
RSAD2	0.802675	22		RSAD2	radical S-adenosyl methionine domain containing 2
IRF7	0.801593	14
CMPK2	0.792116	22
IFI6	0.785402	22
UBTD1	0.777661	2
IFIT1	0.772812	22
DDX60	0.76233	22
MX1	0.755007	22
FLJ36777	0.749336	3
OAS3	0.740428	22
MX2	0.732123	21
DGAT2	0.721595	2
C9orf95	0.705773	8
DDX58	0.698897	22
PARP9	0.698784	22
AZGP1	0.687142	0
KIF27	0.684368	2
LURAP1	0.681614	18
CYP3A5	0.681198	2
BLVRB	0.649111	1
HAUS4	0.616781	5
SLC15A2	0.607134	2
BOK.AS1	0.579595	3
MTRNR2L3	0.571463	3
AMZ2P1	0.530637	16
ZDBF2	0.526657	1
GLUL	0.526324	1
CREB3L1	0.524149	12
NT5M	0.520717	4
ZNF429	0.517203	0
LOC283788	0.476674	1
PPP2R5A	0.473919	0
AZGP1P1	0.443658	0
APOB	0.429724	0
XCL1	0.423738	0
RASGRP3	0.338695	0
LOC100505549	0.13749	0
FAM108B1	0.0859282	0
KLF6	-0.243547	1
IGSF21	-0.381748	0
SPTBN5	-0.410764	1
ADCYAP1	-0.47444	4
SPESP1	-0.483657	20
SORCS2	-0.512194	1
KCNMB3	-0.514231	0
TTC3P1	-0.518713	2
CDR2	-0.525514	5
CTGF	-0.528518	3
PAPPA	-0.547183	3
PRORSD1P	-0.551855	6
THBS1	-0.557404	1
CGREF1	-0.559127	1
XBP1	-0.564045	2
ZNF439	-0.572587	5
KIAA1522	-0.576265	4
POMZP3	-0.578094	8
TNMD	-0.605756	3
SLC7A2	-0.61005	3
TNFRSF12A	-0.63625	0
BMS1P4	-0.644363	6
CECR7	-0.645197	7
MAPT	-0.653657	3
NUAK1	-0.656128	5
FILIP1L	-0.660074	9
C15orf59	-0.668148	21
JPH2	-0.674451	11
TXNRD1	-0.687747	7
CHST3	-0.698006	2
CCRN4L	-0.707369	11
C1QTNF5	-0.712028	5
NCALD	-0.719214	5
BEST1	-0.726799	11
RRAS2	-0.747746	2
ANKRD1	-0.75639	4
MAP1B	-0.761415	12
DAAM2	-0.762197	5
SLC35C1	-0.772534	8
SRPX2	-0.793052	8
SYTL4	-0.806944	7
CRY1	-0.835431	18
